# Supplementary material for: Lineage-Specific Genes and Family Expansions in Dictyostelid Genomes Display Expression Bias and Evolutionary Diversification during Development
Source: Genes (Basel). 2021 Oct 16;12(10):1628. doi: 10.3390/genes12101628 (PMC8535579; doi:10.3390/genes12101628)
Supplement: Supplementary file 1 [file genes-12-01628-s001.zip › Luna_manuscript_SuppTables.xlsx]

## Sheet: TableS1.Genomes
Table S1: Genome assembly and annotation statistics. Genome information for each of five dictyostelid species including the genome size, number of coding genes, number of scaffolds and scaffold N50, number of contigs and contig N50, as reported in Ensembl Protists.
Species	Genome Size (Mb)	Coding Genes	Scaffolds	Scaffold N50	Contigs	Contig N50
dd: D. discoideum	34.13	13243	39	5450249	259	341816
dp: D. purpureum	32.85	12398	799	66881	1212	45210
df: D. (C.) fasciculata	31.02	12165	25	2485436	35	1542377
dl: D. (T.) lacteum	23.38	10224	54	1098390	54	1098390
pp: P. pallidum	32.97	12367	43	1505626	64	1220979

## Sheet: TableS2.Orthogroups
Table S2. Orthogroups. Protein accessions for each protein assigned to each orthogroup via Orthofinder.
Orthogroup	Dictyostelium_discoideum.dicty_2.7.pep.all	Dictyostelium_purpureum.v1.0.pep.all	Dictyostelium_lacteum.ASM160615v1.pep.all	Dictyostelium_fasciculatum.DFas_2.0.pep.all	Polysphondylium_pallidum_pn500.PolPal_Dec2009.pep.all
OG0000000	EAL60612, EAL60644, EAL60672, EAL60673, EAL60725, EAL61944, EAL61953, EAL62015, EAL62178, EAL62424, EAL62435, EAL62436, EAL62437, EAL63028, EAL63029, EAL63293, EAL63301, EAL63427, EAL63799, EAL63858, EAL63991, EAL64986, EAL65077, EAL66213, EAL66898, EAL66900, EAL66975, EAL67301, EAL67304, EAL67305, EAL68061, EAL68438, EAL68533, EAL68539, EAL68832, EAL69317, EAL70106, EAL70108, EAL70358, EAL70411,…	EGC29300, EGC29577, EGC31042, EGC33093, EGC33270, EGC33399, EGC33435, EGC33480, EGC33716, EGC33797, EGC34198, EGC34293, EGC34405, EGC34465, EGC34701, EGC34702, EGC34703, EGC35504, EGC35737, EGC35993, EGC37177, EGC37465, EGC37466, EGC37467, EGC38339, EGC38428, EGC38508, EGC39446, EGC39448, EGC39455, EGC39456, EGC39595, EGC39938, EGC40141, EGC40218, EGC40445	KYQ88765, KYQ89252, KYQ89253, KYQ89254, KYQ89604, KYQ89900, KYQ89970, KYQ90001, KYQ90012, KYQ90013, KYQ90014, KYQ90018, KYQ90019, KYQ90021, KYQ90048, KYQ90456, KYQ90458, KYQ90459, KYQ90461, KYQ91115, KYQ91162, KYQ91163, KYQ91164, KYQ91538, KYQ91539, KYQ91540, KYQ91541, KYQ91561, KYQ91562, KYQ91777, KYQ91778, KYQ91779, KYQ91780, KYQ92311, KYQ92641, KYQ92791, KYQ92813, KYQ92830, KYQ92870, KYQ93135,…	EGG21304	EFA77592, EFA78774, EFA80332, EFA82747, EFA84153
OG0000001	EAL60836, EAL61261, EAL61266, EAL61995, EAL62012, EAL62042, EAL62069, EAL62113, EAL62114, EAL62124, EAL62140, EAL62141, EAL62143, EAL62145, EAL62146, EAL62165, EAL62167, EAL62169, EAL62173, EAL62180, EAL62191, EAL62200, EAL62201, EAL62202, EAL62386, EAL62393, EAL62394, EAL62427, EAL62431, EAL62509, EAL62510, EAL62525, EAL62526, EAL62528, EAL62570, EAL62581, EAL62587, EAL62588, EAL62600, EAL62609,…	EGC28345, EGC28346, EGC28568, EGC28858, EGC30905, EGC30906, EGC31153, EGC32073, EGC32226, EGC32640, EGC32754, EGC34744, EGC35405, EGC35477, EGC36649, EGC36660, EGC36661, EGC36667, EGC37365, EGC37809, EGC37813, EGC37987, EGC40168, EGC40270, EGC40521, EGC40522, EGC40556, EGC40580, EGC40582, EGC40583, EGC40584, EGC40585, EGC40586, EGC40617	KYR01371
OG0000002	EAL60564, EAL61131, EAL62123, EAL63667, EAL70347, EAL72620		KYQ89643, KYQ99660	EGG23282	EFA75746, EFA75748, EFA75751, EFA75753, EFA75755, EFA75756, EFA75763, EFA75765, EFA75818, EFA75832, EFA75895, EFA76194, EFA76195, EFA76276, EFA76277, EFA76680, EFA76703, EFA76711, EFA77175, EFA77301, EFA77302, EFA77397, EFA77455, EFA77465, EFA77733, EFA77899, EFA77901, EFA77905, EFA77921, EFA77943, EFA78724, EFA78974, EFA78975, EFA79012, EFA79023, EFA79034, EFA79036, EFA79038, EFA79039, EFA79278,…
OG0000003	EAL60587, EAL61139, EAL61140, EAL61176, EAL61433, EAL61569, EAL61628, EAL62055, EAL62199, EAL62349, EAL62416, EAL62460, EAL62461, EAL62524, EAL62606, EAL62619, EAL62635, EAL62787, EAL63222, EAL63471, EAL63954, EAL64890, EAL65502, EAL65696, EAL65752, EAL65766, EAL66133, EAL66693, EAL67822, EAL68272, EAL68318, EAL68636, EAL69300, EAL69532, EAL69719, EAL69762, EAL70002, EAL70031, EAL70315, EAL70374,…	EGC28379, EGC28443, EGC28882, EGC29148, EGC29482, EGC29767, EGC29832, EGC29877, EGC29969, EGC30607, EGC30836, EGC31630, EGC31645, EGC32130, EGC33029, EGC33063, EGC33282, EGC33321, EGC33322, EGC33522, EGC33524, EGC33745, EGC33798, EGC33917, EGC35175, EGC35287, EGC35449, EGC35582, EGC35691, EGC36802, EGC36959, EGC37263, EGC37423, EGC38114, EGC38466, EGC39172, EGC39360, EGC40425, EGC40469, EGC40470,…	KYQ89203	EGG18033
OG0000004	EAL60542, EAL60703, EAL60764, EAL60932, EAL61340, EAL61509, EAL61828, EAL61906, EAL62614, EAL62903, EAL64542, EAL64788, EAL65008, EAL66236, EAL66253, EAL66709, EAL66764, EAL67565, EAL67566, EAL68991, EAL68992, EAL69405, EAL69722, EAL69724, EAL69891, EAL70269, EAL70629, EAL70630, EAL70881, EAL70882, EAL71979, EAL71982, EAL71983, EAL72121, EAL72328, EAL72579, EAL72674, EAL72776, EAL72793, EAL72853,…		KYQ89520, KYQ89527, KYQ91085, KYQ91370, KYQ92503, KYQ93912, KYQ93914, KYQ94504, KYQ96716, KYR00381, KYR02182, KYR02867	EGG14130, EGG14155, EGG15233, EGG22530, EGG22538	EFA75641, EFA75745, EFA75767, EFA76095, EFA77382, EFA81332, EFA81385, EFA82275, EFA82552, EFA83891, EFA84352, EFA84464, EFA85278, EFA85328, EFA85616, EFA86293, EFA86856, EFA86857
OG0000005	EAL61329, EAL61721, EAL62532, EAL62556, EAL62727, EAL62906, EAL63002, EAL63056, EAL64094, EAL65666, EAL66912, EAL67193, EAL67285, EAL67471, EAL67472, EAL67473, EAL67474, EAL67486, EAL68678, EAL68725, EAL68740, EAL68741, EAL68925, EAL68981, EAL69065, EAL69645, EAL69981, EAL70452, EAL70940, EAL71062, EAL71335, EAL71377, EAL71536, EAL71681, EAL71683, EAL72702, EAL72751, EAL72867, EAL73091, EAL73629,…	EGC28537, EGC28538, EGC28576, EGC28700, EGC29336, EGC29717, EGC30375, EGC30377, EGC30378, EGC30379, EGC30386, EGC31027, EGC31369, EGC31679, EGC31741, EGC32542, EGC32543, EGC32669, EGC33512, EGC33528, EGC33748, EGC33749, EGC33750, EGC33751, EGC33752, EGC33916, EGC33939, EGC34294, EGC35127, EGC35684, EGC35890, EGC36498, EGC36795, EGC37021, EGC37054, EGC37847, EGC38761, EGC39901, EGC40233
OG0000006	EAL68770, EAL68849	EGC35897	KYQ94368, KYQ94369	EGG13377, EGG13379, EGG14550, EGG15907, EGG15970, EGG15971, EGG15972, EGG16010, EGG16017, EGG16031, EGG16034, EGG16180, EGG17239, EGG17369, EGG17370, EGG17474, EGG17590, EGG17815, EGG17817, EGG17822, EGG18148, EGG19220, EGG19314, EGG19344, EGG19668, EGG20096, EGG20783, EGG20827, EGG21051, EGG21052, EGG21605, EGG21858, EGG22013, EGG22054, EGG22189, EGG22843, EGG22844, EGG24211, EGG24999, EGG25250	EFA74709, EFA74943, EFA74945, EFA75704, EFA75855, EFA75856, EFA76060, EFA76086, EFA76429, EFA76499, EFA76634, EFA76775, EFA78080, EFA78596, EFA78597, EFA78600, EFA79222, EFA79223, EFA80040, EFA80554, EFA80593, EFA80710, EFA81066, EFA81347, EFA81348, EFA81349, EFA81354, EFA81356, EFA82123, EFA82403, EFA84777, EFA85226, EFA85395
OG0000007				EGG14567, EGG15191, EGG15519, EGG15520, EGG16327, EGG17236, EGG18318, EGG18424, EGG18513, EGG18516, EGG18536, EGG18575, EGG18576, EGG18578, EGG18584, EGG18585, EGG18587, EGG18590, EGG18593, EGG18608, EGG18625, EGG18626, EGG18634, EGG18636, EGG18652, EGG18655, EGG18665, EGG18666, EGG18670, EGG18674, EGG18675, EGG18676, EGG18678, EGG18684, EGG18685, EGG18693, EGG18694, EGG18697, EGG18698, EGG18699,…	EFA75039, EFA75046, EFA76323, EFA78456, EFA78962, EFA80849, EFA81639, EFA84283, EFA84447, EFA85741
OG0000008	EAL67891	EGC39365	KYQ90889, KYR02767	EGG15319, EGG15321, EGG16286, EGG17253, EGG17331, EGG17332, EGG17333, EGG17344, EGG17346, EGG17348, EGG17349, EGG17350, EGG17414, EGG17416, EGG17417, EGG17418, EGG17420, EGG17422, EGG17424, EGG17426, EGG17440, EGG17445, EGG17449, EGG17452, EGG17453, EGG17454, EGG17455, EGG19010, EGG19063, EGG19065, EGG19131, EGG19136, EGG19137, EGG19138, EGG19139, EGG19141, EGG19143, EGG19145, EGG19147, EGG19148,…	EFA83672, EFA85912, EFA86786
OG0000009	EAL68427, EAL72292	EGC35427, EGC39625	KYQ90045, KYQ90943	EGG13407, EGG13419, EGG13483, EGG13904, EGG14787, EGG15912, EGG15921, EGG15922, EGG15936, EGG15938, EGG15939, EGG15942, EGG15943, EGG15944, EGG15945, EGG15946, EGG15948, EGG15949, EGG15950, EGG15951, EGG16097, EGG16151, EGG16153, EGG18325, EGG18804, EGG18805, EGG19486, EGG19511, EGG19593, EGG19595, EGG19596, EGG19908, EGG20657, EGG20663, EGG20828, EGG20830, EGG20832, EGG21764, EGG22768, EGG23028,…	EFA80407, EFA85954
OG0000010	EAL71997	EGC35167	KYR03008	EGG14180, EGG15172, EGG15528, EGG19226, EGG19230, EGG19623, EGG19751, EGG19773, EGG19776, EGG19777, EGG19799, EGG19810, EGG19813, EGG19819, EGG19837, EGG19845, EGG19849, EGG19858, EGG19878, EGG20001, EGG20679, EGG24381, EGG24648, EGG24679	EFA74606, EFA74612, EFA74644, EFA74652, EFA74655, EFA74672, EFA74674, EFA74679, EFA74694, EFA74701, EFA75860, EFA77434, EFA77443, EFA77452, EFA77461, EFA77478, EFA77482, EFA77489, EFA77498, EFA77518, EFA77544, EFA77549, EFA77574, EFA78540, EFA78731, EFA78822, EFA78826, EFA79237, EFA79356, EFA81000, EFA81793, EFA84771, EFA86156
OG0000011	EAL62506, EAL62543, EAL62666, EAL62918, EAL62963, EAL67074, EAL69792, EAL69957, EAL69959, EAL69960, EAL69961, EAL70035, EAL70173, EAL70192, EAL70193, EAL70256, EAL71184, EAL71276, EAL71967	EGC30058, EGC30585, EGC31214, EGC31345, EGC31475, EGC33475, EGC33482, EGC34073, EGC34244, EGC35682, EGC37388, EGC37400, EGC37721, EGC38622, EGC39665, EGC40221	KYQ96772, KYR00861, KYR01122, KYR01165, KYR01361	EGG13870, EGG13945, EGG14011, EGG14129, EGG17092, EGG17475, EGG23832, EGG23922, EGG24304	EFA75585, EFA77366, EFA77683, EFA80799, EFA81456, EFA81888, EFA83569, EFA83595, EFA85276
OG0000012	EAL63153, EAL69904, EAL73409, EAL73437, EAL73439, EAL73501, EAL73647, EAL73648, EAL73657, EAL73730	EGC32623, EGC33068, EGC33502, EGC34484, EGC34802, EGC36083, EGC39735	KYQ96679, KYR02509		EFA77892, EFA78784, EFA79601, EFA79602, EFA79606, EFA79609, EFA79611, EFA79614, EFA79615, EFA79621, EFA79622, EFA79623, EFA79632, EFA79681, EFA79789, EFA79793, EFA79794, EFA79954, EFA79955, EFA79957, EFA79959, EFA80009, EFA81935, EFA82118, EFA83519, EFA84236, EFA84238, EFA84742, EFA84985, EFA84986, EFA85275, EFA85476, EFA86159, EFA86425, EFA86459, EFA86460, EFA86576
OG0000013	EAL66887	EGC30985	KYQ88179, KYQ88642, KYQ88643, KYQ88644, KYQ88766, KYQ89005, KYQ89007, KYQ89009, KYQ89010, KYQ89011, KYQ89012, KYQ89013, KYQ89014, KYQ89030, KYQ89045, KYQ89106, KYQ89280, KYQ89638, KYQ89660, KYQ90688, KYQ90984, KYQ91029, KYQ91498, KYQ91611, KYQ91612, KYQ91624, KYQ91625, KYQ91838, KYQ91840, KYQ91958, KYQ92052, KYQ92162, KYQ92219, KYQ92439, KYQ92440, KYQ92750, KYQ92844, KYQ92868, KYQ92941, KYQ93969,…		EFA78729
OG0000014				EGG19308	EFA74811, EFA74918, EFA74920, EFA74936, EFA74938, EFA74939, EFA74940, EFA74946, EFA74948, EFA74949, EFA75030, EFA75281, EFA75337, EFA75461, EFA75626, EFA76655, EFA77136, EFA77289, EFA77290, EFA77453, EFA77456, EFA77464, EFA77466, EFA77571, EFA77707, EFA77743, EFA78154, EFA79230, EFA79269, EFA79281, EFA79286, EFA79361, EFA80796, EFA81028, EFA81404, EFA81406, EFA81409, EFA81410, EFA81796, EFA81820,…
OG0000015	EAL65665, EAL67385, EAL67531, EAL70024, EAL70474, EAL70953, EAL73522	EGC28674, EGC29745, EGC30698, EGC30699, EGC31773, EGC33258, EGC34770, EGC37550	KYQ88317, KYQ91354, KYQ92637, KYQ93854, KYQ94192, KYQ94193, KYQ99801, KYR01429, KYR03138, KYR03139	EGG13491, EGG18416, EGG18433, EGG19016, EGG22366, EGG22471	EFA74843, EFA75483, EFA76017, EFA76672, EFA76996, EFA77169, EFA77203, EFA78463, EFA78503, EFA78549, EFA79694, EFA79930, EFA81167, EFA81361, EFA81579, EFA81652, EFA81785, EFA83984, EFA83985, EFA84822, EFA85596, EFA85642, EFA85643
OG0000016					EFA75320, EFA75323, EFA75332, EFA75333, EFA75334, EFA75335, EFA75338, EFA75353, EFA75368, EFA75567, EFA75602, EFA75853, EFA76191, EFA76263, EFA76264, EFA77032, EFA77463, EFA77891, EFA77900, EFA77904, EFA78018, EFA78896, EFA79598, EFA79603, EFA79617, EFA79655, EFA80723, EFA80724, EFA81047, EFA81098, EFA81174, EFA81194, EFA81633, EFA81664, EFA81986, EFA82560, EFA83476, EFA83689, EFA83831, EFA84168,…
OG0000017	EAL63556, EAL63557, EAL67349, EAL67363, EAL67364, EAL67365, EAL68432, EAL68441, EAL68781	EGC30437, EGC31085, EGC31206, EGC34003, EGC34286, EGC34385, EGC34549, EGC36060, EGC36061, EGC36143, EGC36927, EGC39322, EGC40149, EGC40150	KYQ90906, KYQ99813, KYR00508, KYR00521, KYR02993	EGG13772, EGG13773, EGG13774, EGG15795, EGG15796, EGG15797, EGG15846, EGG15847, EGG16387, EGG18024, EGG18060, EGG18065, EGG18067, EGG18162, EGG22434	EFA75842, EFA81616, EFA81665, EFA81701, EFA81709
OG0000018	EAL61265, EAL63048, EAL66115, EAL69850, EAL72251, EAL72472	EGC29266, EGC30959, EGC33082, EGC33335, EGC33520, EGC33838, EGC34292, EGC34824, EGC35269, EGC35523, EGC35524, EGC36516, EGC36771, EGC36976, EGC37133, EGC37137, EGC38079, EGC38765, EGC39690, EGC39836, EGC40258, EGC40259, EGC40520, EGC40551, EGC40552, EGC40559, EGC40560, EGC40562, EGC40563, EGC40564, EGC40565, EGC40566, EGC40567, EGC40568, EGC40569, EGC40581, EGC40587, EGC40609, EGC40611, EGC40612,…
OG0000019			KYQ89837, KYR00043	EGG16055, EGG16901, EGG18100, EGG18102, EGG18104, EGG19346, EGG19347, EGG19350, EGG20020, EGG22094, EGG24294, EGG24380	EFA74625, EFA75354, EFA75684, EFA75786, EFA75973, EFA75977, EFA76125, EFA76136, EFA77039, EFA77043, EFA78162, EFA78354, EFA79017, EFA80192, EFA80733, EFA81037, EFA81049, EFA81546, EFA81962, EFA82586, EFA82635, EFA83103, EFA83392, EFA83513, EFA84724, EFA85079, EFA85322, EFA85482, EFA85502, EFA85544, EFA85571, EFA85572, EFA85688
OG0000020	EAL68159	EGC37363	KYQ90962, KYQ96729, KYR02374	EGG22031	EFA77596, EFA78759, EFA78793, EFA78794, EFA78808, EFA79629, EFA79866, EFA79867, EFA79882, EFA79883, EFA82020, EFA82028, EFA82030, EFA82034, EFA82036, EFA82050, EFA82063, EFA82066, EFA82071, EFA82074, EFA82081, EFA82086, EFA82087, EFA82103, EFA82105, EFA82114, EFA82390, EFA82420, EFA83048, EFA83122, EFA83143, EFA83173, EFA83568, EFA83582, EFA83583, EFA83766, EFA83767, EFA84014
OG0000021	EAL60481, EAL60559, EAL60697, EAL60922, EAL61159, EAL61293, EAL61310, EAL61387, EAL61469, EAL61472, EAL61500, EAL61512, EAL61794, EAL64167, EAL64175, EAL64539, EAL64737, EAL64787, EAL65341, EAL66727, EAL67436, EAL67487, EAL67620, EAL67949, EAL68993, EAL69274, EAL69303, EAL69385, EAL70311, EAL71297, EAL71856, EAL72735, EAL72745, EAL73623	EGC30767, EGC31924, EGC32568, EGC33527, EGC36289, EGC37004, EGC39187, EGC39459
OG0000022	EAL61012			EGG14239, EGG14240, EGG14475, EGG15595, EGG16761, EGG16764, EGG16780, EGG16787, EGG20017, EGG22166, EGG22174, EGG22203, EGG22215, EGG22216, EGG22224, EGG22235, EGG22239, EGG22252, EGG22258, EGG22275, EGG22276, EGG22289, EGG22291, EGG22292, EGG22294, EGG22296, EGG22297, EGG22298, EGG22302, EGG22303, EGG22304, EGG22317, EGG22318, EGG22319, EGG22320, EGG23583, EGG23612, EGG24268, EGG24987, EGG24988	EFA80869
OG0000023				EGG18961, EGG23699, EGG23969	EFA75089, EFA75342, EFA75494, EFA75646, EFA75656, EFA75657, EFA75717, EFA75780, EFA75784, EFA75788, EFA75794, EFA75795, EFA75796, EFA75839, EFA75844, EFA75846, EFA75933, EFA75935, EFA75943, EFA76612, EFA77125, EFA77129, EFA78027, EFA78110, EFA78139, EFA79254, EFA79808, EFA79811, EFA79826, EFA79827, EFA79828, EFA79829, EFA79931, EFA79932, EFA80032, EFA80060, EFA81970, EFA83336, EFA83337
OG0000024		EGC29081, EGC33050	KYR01702, KYR02991	EGG20456, EGG21925, EGG21926	EFA75150, EFA75318, EFA75340, EFA75341, EFA75402, EFA75405, EFA75413, EFA75416, EFA75806, EFA75807, EFA77970, EFA78677, EFA78698, EFA78708, EFA78736, EFA78737, EFA79164, EFA79180, EFA80067, EFA80069, EFA80075, EFA80079, EFA80080, EFA80082, EFA80089, EFA80099, EFA80101, EFA80103, EFA80943, EFA81105, EFA81252, EFA81362, EFA81649, EFA84650, EFA86102
OG0000025	EAL62233, EAL71059, EAL71168, EAL71169, EAL71194, EAL71795, EAL71811, EAL71812, EAL72097, EAL72504, EAL73446	EGC28668, EGC29107, EGC29398, EGC29914, EGC30521, EGC30865, EGC31293, EGC32218, EGC32219, EGC32232, EGC32453, EGC33046, EGC33090, EGC33105, EGC34387, EGC36166, EGC36170, EGC37132, EGC37163, EGC37233, EGC37611, EGC37799, EGC38292, EGC38398, EGC38509, EGC39102, EGC39702, EGC39749, EGC39808, EGC39889
OG0000026			KYQ88510, KYQ88511, KYQ89928, KYQ90353, KYQ90354, KYQ91470, KYQ91948, KYQ91949, KYQ92323, KYQ92324, KYQ92989, KYQ93498, KYQ93942, KYQ93943, KYR00012, KYR00895, KYR00896, KYR01160, KYR01389, KYR01390, KYR02491, KYR02492	EGG15642, EGG15672, EGG15673, EGG15674, EGG15676, EGG16667, EGG16985, EGG16986, EGG18077, EGG18079, EGG19565, EGG21504, EGG22993, EGG23044, EGG23045, EGG23746, EGG23747, EGG23748	EFA75956
OG0000027		EGC35099	KYR01817	EGG13336, EGG13401, EGG13504, EGG14447, EGG14448, EGG15876, EGG15881, EGG16244, EGG16436, EGG17371, EGG17610, EGG17679, EGG19079, EGG19400, EGG20329, EGG20331, EGG20702, EGG20781, EGG21915, EGG22177, EGG22744, EGG24621, EGG25343, EGG25344, EGG25346	EFA81489, EFA82623, EFA82973, EFA82974, EFA83528, EFA83535, EFA83572, EFA84181, EFA84783, EFA85668, EFA85779, EFA86029
OG0000028				EGG13322, EGG15073, EGG15375, EGG15416, EGG15417, EGG15419, EGG15420, EGG15421, EGG15904, EGG16000, EGG16968, EGG18496, EGG19012, EGG19261, EGG19263, EGG19264, EGG19266, EGG19272, EGG19279, EGG19284, EGG19285, EGG19286, EGG19287, EGG19288, EGG20510, EGG20554, EGG21017, EGG21019, EGG21020, EGG21021, EGG21022, EGG21023, EGG21024, EGG22929, EGG24270, EGG24861, EGG25008	EFA76160
OG0000029	EAL73535				EFA74512, EFA75721, EFA75766, EFA76266, EFA76626, EFA76627, EFA76671, EFA76987, EFA77083, EFA77092, EFA77133, EFA77134, EFA77521, EFA78715, EFA78924, EFA79348, EFA79755, EFA80499, EFA80621, EFA81568, EFA82432, EFA82599, EFA82904, EFA83953, EFA84161, EFA84163, EFA84170, EFA84174, EFA84211, EFA84246, EFA84432, EFA84449, EFA84450, EFA84459, EFA84465, EFA84476
OG0000030	EAL61079, EAL70047, EAL70633, EAL70634, EAL70650, EAL70749, EAL70750, EAL70751, EAL72456, EAL72457	EGC28494, EGC29182, EGC31439, EGC31757, EGC33264, EGC34973, EGC38449, EGC39121, EGC39122, EGC39279, EGC39787, EGC40022, EGC40356	KYQ92785, KYQ93021, KYQ93423, KYR00154, KYR00330	EGG23362, EGG24114	EFA75418, EFA75554, EFA75555, EFA80347, EFA84072, EFA85909, EFA85910
OG0000031			KYQ89961, KYQ90119, KYQ90252, KYQ90738, KYQ90857, KYQ90858, KYQ92556, KYQ92966, KYQ93002, KYQ93196, KYQ94098, KYQ94180, KYQ99726, KYR01123, KYR01125, KYR01133, KYR01867, KYR01896, KYR01940, KYR02018, KYR02041, KYR02046, KYR02052, KYR02056, KYR02058, KYR02059, KYR02060, KYR02064, KYR02076, KYR02103, KYR02151, KYR02351, KYR02352, KYR02354, KYR03068	EGG20386, EGG23415
OG0000032	EAL63586, EAL64452, EAL68898, EAL72374	EGC29450, EGC30675, EGC30755, EGC30756, EGC32577, EGC32609, EGC32772, EGC33253, EGC33381, EGC33907, EGC33998, EGC34061, EGC34085, EGC34838, EGC34965, EGC35096, EGC35341, EGC35769, EGC35958, EGC35961, EGC36237, EGC36386, EGC37341, EGC37519, EGC37657, EGC38400, EGC39505, EGC39765, EGC40009, EGC40502			EFA81183, EFA81258
OG0000033	EAL62190, EAL67711	EGC28967, EGC35528, EGC36389, EGC38219, EGC39103	KYQ89333, KYQ91719, KYQ92200, KYQ92201, KYQ92499, KYQ93441, KYR02211	EGG17373, EGG17547, EGG18282, EGG19366, EGG19367, EGG24290, EGG25129	EFA75975, EFA75976, EFA76620, EFA79503, EFA79892, EFA79894, EFA80033, EFA80857, EFA81816, EFA81922, EFA81930, EFA82012, EFA82013, EFA82556, EFA85452
OG0000034	EAL61292, EAL63971, EAL64369, EAL64370, EAL66179, EAL66354, EAL66547, EAL68798, EAL70219, EAL71213, EAL71411, EAS66892	EGC29031, EGC30852, EGC31086, EGC31087, EGC31549, EGC31555, EGC34014, EGC34667, EGC36341, EGC37741, EGC37979, EGC39391, EGC39421, EGC39430, EGC40275, EGC40276, EGC40325, EGC40355, EGC40532, EGC40534, EGC40535, EGC40536, EGC40615, EGC40616
OG0000035			KYQ88650, KYR02404, KYR02439	EGG17543	EFA75151, EFA75262, EFA75274, EFA75302, EFA75303, EFA75304, EFA75306, EFA79592, EFA79595, EFA79599, EFA79744, EFA80176, EFA80798, EFA82277, EFA82489, EFA83552, EFA83757, EFA83759, EFA83764, EFA85136, EFA85137, EFA85138, EFA85159, EFA85189, EFA85190, EFA85191, EFA85272, EFA85846, EFA85986, EFA85987, EFA86035, EFA86037
OG0000036	EAL62807	EGC29815	KYQ93315	EGG16919, EGG16951, EGG17039, EGG17041, EGG20297, EGG20580, EGG24543, EGG24567, EGG24600, EGG24601, EGG24607, EGG24654, EGG24655, EGG24660, EGG24667, EGG24669, EGG24682, EGG24683, EGG24689, EGG24711, EGG24718, EGG24730, EGG24742, EGG24759, EGG24760, EGG24764, EGG24807, EGG24818, EGG24819, EGG24901, EGG24941	EFA78483
OG0000037	EAL62571, EAL73562	EGC29192, EGC29575, EGC29746, EGC29803, EGC29853, EGC30721, EGC31222, EGC31492, EGC31854, EGC32814, EGC33728, EGC33740, EGC36253, EGC37045, EGC37637, EGC38403, EGC38419, EGC39397, EGC39736, EGC39743, EGC39744, EGC40229, EGC40264, EGC40303, EGC40388, EGC40389	KYQ88244, KYQ89179	EGG19302, EGG19641	EFA74868, EFA79434
OG0000038					EFA74807, EFA75478, EFA75885, EFA77126, EFA77128, EFA77746, EFA77840, EFA77857, EFA77858, EFA77859, EFA77866, EFA77889, EFA77898, EFA78526, EFA78832, EFA78838, EFA79579, EFA79616, EFA79646, EFA79647, EFA79652, EFA79657, EFA79658, EFA79660, EFA79661, EFA79663, EFA79683, EFA79698, EFA82225, EFA83300, EFA83301, EFA84108, EFA85992, EFA86514
OG0000039	EAL61221, EAL61911, EAL61913, EAL61916, EAL61948, EAL61981, EAL61982, EAL61983, EAL61986, EAL62006, EAS66947	EGC28234, EGC28235, EGC30330, EGC30757, EGC31507, EGC31508, EGC31509, EGC31510, EGC31511, EGC31513, EGC35424, EGC36932, EGC37173, EGC37254, EGC38740, EGC39401, EGC39434, EGC39717, EGC39719, EGC40443, EGC40448		EGG18108
OG0000040	EAL66361		KYQ92218	EGG14357, EGG14358, EGG15336, EGG16729, EGG17703, EGG17781, EGG17900, EGG18021, EGG18040, EGG18346, EGG18632, EGG18696, EGG21680, EGG22914, EGG22915, EGG22916, EGG22917, EGG22921, EGG22946, EGG22947, EGG22948, EGG24229, EGG24256, EGG24259, EGG24260, EGG24269, EGG24339, EGG24340, EGG24341, EGG24342, EGG24343
OG0000041	EAL62732	EGC36456	KYQ89682, KYQ89685	EGG16052, EGG16900, EGG18105, EGG19345, EGG20021, EGG22095, EGG24293	EFA75974, EFA76127, EFA76135, EFA77037, EFA77038, EFA77040, EFA77044, EFA78204, EFA78206, EFA79444, EFA79445, EFA81908, EFA82627, EFA82628, EFA82640, EFA82641, EFA83393, EFA85321, EFA85438, EFA85439, EFA85570
OG0000042	EAL60742, EAL60839, EAL60931, EAL61072, EAL63778, EAL64893, EAL65271, EAL66062, EAL66114, EAL66131, EAL66258, EAL66530, EAL66551, EAL67409, EAL67843, EAL68835, EAL68869, EAL69201, EAL70571, EAL70639, EAL70879, EAL70890, EAL72582, EAL72780, EAL72859, EAL73117	EGC32802, EGC36580	KYQ92840, KYQ94503, KYR00774
OG0000043	EAL60440, EAL60549, EAL60568, EAL60872, EAL60950, EAL61015, EAL61016, EAL61017, EAL61024, EAL61025, EAL63616, EAL67234, EAL67536, EAL70410, EAL71089, EAL71463, EAL72935	EGC31115, EGC32215, EGC32217, EGC33894, EGC33903, EGC34069, EGC39027, EGC40253	KYQ91252, KYQ91255, KYQ91257, KYQ91258, KYQ91297, KYQ94437
OG0000044	EAL62927, EAL63992, EAL64867, EAL66362	EGC28456, EGC28585, EGC29471, EGC30547, EGC32426, EGC32759, EGC32784, EGC32931, EGC32986, EGC33814, EGC34249, EGC35147, EGC35763, EGC36055, EGC36646, EGC37236, EGC37551, EGC37810, EGC38095, EGC38099, EGC38420, EGC38510, EGC39205, EGC39616, EGC40133, EGC40318, EGC40454
OG0000045	EAL62193, EAL64016, EAL64017, EAL66840, EAL66968, EAL67115, EAL67814	EGC29683, EGC29933, EGC30530, EGC30532, EGC30586, EGC31180, EGC32886, EGC35835, EGC36221, EGC36544, EGC36550, EGC36978	KYR02299, KYR02754	EGG16798, EGG20175, EGG20493, EGG23871	EFA75982, EFA77387, EFA78861, EFA79151, EFA81945, EFA82317
OG0000046	EAL60557, EAL65084, EAL65085, EAL72131, EAL72390	EGC28847, EGC33246, EGC33899, EGC34593	KYQ93322, KYR01662, KYR01664, KYR01667	EGG16540, EGG16550, EGG17005, EGG17026, EGG17028	EFA74722, EFA76519, EFA77835, EFA79699, EFA79701, EFA79710, EFA79712, EFA79734, EFA83907, EFA84765, EFA84808, EFA85754, EFA85768
OG0000047	EAL65548, EAL66835, EAL66836, EAL67513, EAL71045, EAL71301	EGC30264, EGC30864, EGC32857, EGC32858, EGC32859, EGC33584, EGC33585, EGC34558, EGC38010, EGC38686, EGC39809, EGC39810	KYQ92715, KYR00553, KYR00556	EGG14711, EGG16783, EGG17408, EGG21338	EFA74824, EFA77940, EFA78427, EFA78592, EFA81740, EFA85693
OG0000048	EAL68368, EAL68913		KYQ88392, KYQ88393, KYQ89110, KYQ89111, KYQ89587, KYQ89848, KYQ90441, KYQ90693, KYQ90694, KYQ90695, KYQ90779, KYQ90780, KYQ90781, KYQ90784, KYQ91005, KYQ92336, KYQ92687, KYQ92891, KYQ94085, KYQ94086, KYQ94413, KYQ96677, KYQ96756, KYQ99691, KYQ99694, KYR00913, KYR02001, KYR02895, KYR02913
OG0000049	EAL66331	EGC39594		EGG19062	EFA74845, EFA74916, EFA74917, EFA74919, EFA74921, EFA74924, EFA74925, EFA75124, EFA75659, EFA75664, EFA75741, EFA75764, EFA75778, EFA75781, EFA75782, EFA75785, EFA75808, EFA75810, EFA75811, EFA75812, EFA75815, EFA75831, EFA75833, EFA75834, EFA75845, EFA77924, EFA78028, EFA82751
OG0000050	EAL66982, EAL69256, EAL70004, EAL70245, EAL71470	EGC31061, EGC35491, EGC36282, EGC38168, EGC38459, EGC39559	KYQ99990, KYQ99991	EGG15909, EGG16242, EGG18242, EGG18253, EGG23853, EGG24172, EGG24835	EFA76568, EFA76927, EFA76955, EFA78077, EFA80086, EFA80096, EFA80688, EFA80757, EFA84966, EFA85432
OG0000051	EAL60298, EAL60307, EAL60325, EAL60326, EAL60354, EAL60367, EAL66749, EAL72827, EAL73761, EAL73767, EAL73770, EAL73790	EGC35166	KYQ96678, KYR01002, KYR01188	EGG14714, EGG14977, EGG16201, EGG16520, EGG16605, EGG20321, EGG21018, EGG22119, EGG22350, EGG22685, EGG24134	EFA82497, EFA84935, EFA85022
OG0000052	EAL62895, EAL72042, EAL72983	EGC28432, EGC28903, EGC29940, EGC30355, EGC30963, EGC31226, EGC34111, EGC34626, EGC35028, EGC35845, EGC36241, EGC36520, EGC36556, EGC36560, EGC36991, EGC38953	KYQ90189, KYQ91279, KYQ92532, KYQ92943, KYR00197, KYR01348	EGG14514, EGG18492	EFA77068, EFA80469, EFA83003
OG0000053	EAL62751, EAL70363	EGC30770, EGC39053	KYQ88217, KYR00241, KYR00685	EGG16231, EGG17027, EGG21965, EGG22961, EGG23589, EGG23660, EGG23675, EGG23854	EFA75369, EFA76402, EFA76409, EFA81324, EFA81326, EFA81327, EFA81770, EFA81924, EFA82380, EFA82770, EFA84039, EFA84613, EFA84702, EFA84706, EFA86526
OG0000054	EAL62163, EAL65450, EAL66574	EGC28323, EGC29752, EGC34078, EGC34402, EGC36154	KYQ92389, KYR02316	EGG13432, EGG13434, EGG13435, EGG13438, EGG13439, EGG13440, EGG13441, EGG13442, EGG13444, EGG13445, EGG13449, EGG13451, EGG13453, EGG16762, EGG18211, EGG18577, EGG23215	EFA79960, EFA82270, EFA83796
OG0000055			KYQ88295, KYQ89219, KYQ89402, KYQ90231, KYQ90232, KYQ90234, KYQ90298, KYQ90300, KYQ90301, KYQ90302, KYQ90303, KYQ90930, KYQ90931, KYQ91065, KYQ91173, KYQ91418, KYQ92005, KYQ92471, KYQ92596, KYQ92925, KYQ94019, KYQ94115, KYQ99788, KYR00238, KYR00541, KYR00761, KYR01166, KYR01639, KYR01774, KYR01776
OG0000056	EAL60393, EAL65406, EAL68684, EAL68686, EAL69941, EAL71119, EAL71720, EAL71723, EAL71730, EAL71731, EAL71737, EAL71738, EAL71744, EAL71826, EAL71832, EAL71833, EAL71834, EAL71836, EAL71839, EAL71842, EAL71845, EAL71846, EAL71847, EAL71869, EAL73131, EAL73262, EAL73289, EAL73700	EGC40057
OG0000057	EAL61334, EAL63651	EGC36381	KYQ89541, KYQ90151, KYQ90859, KYQ90899, KYQ90909, KYQ92263, KYQ92835, KYQ92896, KYQ93955, KYQ94149, KYQ94444, KYQ99682, KYQ99701	EGG13602, EGG19889, EGG22324, EGG23770, EGG24353	EFA76018, EFA76019, EFA77929, EFA78434, EFA83202, EFA83970, EFA85700, EFA86468
OG0000058	EAL62493	EGC28444, EGC28534, EGC28994, EGC29347, EGC29718, EGC30420, EGC30883, EGC31028, EGC31395, EGC31751, EGC33040, EGC33736, EGC33898, EGC34826, EGC35445, EGC35596, EGC37041, EGC37143, EGC38129, EGC38704, EGC38853, EGC39029, EGC39363, EGC39579, EGC40411	KYQ91594	EGG23700	EFA78022
OG0000059	EAL65400, EAL65425, EAL70015, EAL72335, EAL72375	EGC28842, EGC35035	KYQ89354, KYQ90607, KYQ99717	EGG14198, EGG14876, EGG15611, EGG19378, EGG19729, EGG19731, EGG19732, EGG19734, EGG23581, EGG23724	EFA75874, EFA76707, EFA77721, EFA81186, EFA81960, EFA81961, EFA82178, EFA84628, EFA84861
OG0000060	EAL61084, EAL61711, EAL64010, EAL65099, EAL66685, EAL67067, EAL67113, EAL67119, EAL71657, EAL71663, EAL71687, EAL71691	EGC29426, EGC30550, EGC40182, EGC40183, EGC40185, EGC40187, EGC40188, EGC40189, EGC40190, EGC40191, EGC40211, EGC40212, EGC40213, EGC40214, EGC40215, EGC40219, EGC40220
OG0000061	EAL69053	EGC39281	KYQ88814, KYQ88815, KYQ88816, KYQ88817, KYQ89774, KYQ91994, KYQ92436, KYQ92437, KYQ92454, KYQ92519, KYQ93421, KYQ93422, KYQ93451, KYQ93465, KYQ94061, KYQ96736, KYQ96737, KYR01380, KYR02078, KYR02510, KYR02522, KYR02694, KYR02958		EFA74685, EFA75119, EFA76193, EFA86340
OG0000062				EGG13361, EGG16190, EGG17156, EGG18828, EGG18829, EGG18918, EGG18919, EGG18921, EGG18964, EGG19516, EGG19517, EGG19692, EGG19693, EGG19792, EGG20450, EGG20452, EGG20453, EGG20454, EGG20455, EGG20891, EGG20907, EGG20910, EGG20911, EGG21888, EGG24174, EGG24175, EGG24176, EGG24194, EGG24195
OG0000063	EAL61363, EAL62724, EAL62983, EAL67310, EAL70113, EAL70493, EAL70912	EGC33115, EGC33116, EGC34961, EGC36088, EGC37827, EGC37828, EGC38453	KYQ89300, KYQ89641, KYQ89654, KYQ90108, KYQ90109	EGG21928, EGG23108, EGG23347, EGG24552, EGG24995	EFA75228, EFA75229, EFA76162, EFA82368
OG0000064	EAL62255, EAL62256, EAL62257, EAL62259, EAL65377, EAL65725, EAL66405, EAL66486, EAL66774, EAL67432, EAL69527, EAL70157, EAL70327, EAL70400, EAL71162, EAL71460, EAL72220, EAS66920, EAS66946	EGC30789, EGC30790, EGC31427, EGC33230, EGC35055, EGC36388, EGC40164	KYQ89066, KYQ93175
OG0000065	EAL62085, EAL62086	EGC29711, EGC29819, EGC29820, EGC29885, EGC30911, EGC30912, EGC32701, EGC32893, EGC32929, EGC33057, EGC33734, EGC34312, EGC34313, EGC34314, EGC34321, EGC34426, EGC34427, EGC35225, EGC36367, EGC37413, EGC38589, EGC38591, EGC38614, EGC38764, EGC38766, EGC40610
OG0000066	EAL65937, EAL65955, EAL72449, EAL73520	EGC29206, EGC35704, EGC35721, EGC35722, EGC36181, EGC38155, EGC38425, EGC38778, EGC38799, EGC39331, EGC39918, EGC39921, EGC39936, EGC39950, EGC40361, EGC40495	KYR00223, KYR00841	EGG15473, EGG19699, EGG23446	EFA77237, EFA78469, EFA82825
OG0000067	EAL67478, EAL68708, EAL68939, EAL68976, EAL68977, EAL68978, EAL69061, EAL69063, EAL69064, EAL69146, EAL69150, EAL69458, EAL69820	EGC28296, EGC30666, EGC34591, EGC34602, EGC34748, EGC35158, EGC36917, EGC36935, EGC38438	KYQ88386, KYQ91527, KYQ96717, KYQ96722, KYR02364, KYR02844
OG0000068				EGG13580, EGG13581, EGG13583, EGG13584, EGG13585, EGG14191, EGG14745, EGG14746, EGG14747, EGG14748, EGG14749, EGG15679, EGG15940, EGG16949, EGG16954, EGG17089, EGG17222, EGG17826, EGG17949, EGG18331, EGG19066, EGG21106, EGG22566, EGG22784, EGG24308, EGG24368, EGG24633	EFA77958
OG0000069				EGG21963, EGG22613	EFA77200, EFA77202, EFA79817, EFA80525, EFA80807, EFA82311, EFA82802, EFA83677, EFA84889, EFA84890, EFA84891, EFA84893, EFA84896, EFA84898, EFA84899, EFA84900, EFA84915, EFA84923, EFA84924, EFA84925, EFA84926, EFA84993, EFA84994, EFA84995, EFA84996, EFA84999
OG0000070	EAL69295, EAL71818, EAL72789	EGC29226, EGC29326, EGC37732	KYQ88441, KYR00446	EGG15581, EGG15589, EGG15591, EGG15592, EGG15623, EGG15692, EGG15774, EGG17230, EGG17384, EGG19091, EGG19116, EGG20736, EGG20759, EGG22872, EGG23960	EFA79201, EFA83236, EFA83554, EFA84342
OG0000071	EAL60709, EAL70581, EAL70754, EAL71953, EAL71954, EAL71955, EAL71956	EGC31159, EGC32812, EGC38277	KYQ91227, KYQ91763, KYQ99842, KYR00643	EGG16693, EGG16975, EGG18744, EGG19464, EGG25222, EGG25223, EGG25235	EFA76868, EFA77563, EFA79509, EFA79741, EFA80736, EFA82003
OG0000072	EAL66576, EAL68888, EAL70077, EEU04150	EGC28782, EGC29447, EGC29475, EGC29540, EGC30101, EGC30578, EGC31253, EGC31300, EGC31875, EGC33042, EGC33946, EGC34442, EGC35886, EGC36279, EGC37458, EGC38387, EGC39510, EGC40194, EGC40570	KYQ89965, KYQ93827	EGG17134	EFA83693
OG0000073	EAL64336, EAL65308, EAL65336, EAL71697, EAL71787	EGC31204, EGC31287, EGC31560, EGC33455, EGC34746, EGC36908, EGC39972	KYQ92546, KYQ92548, KYQ92935, KYR00625, KYR00651, KYR02578	EGG20426, EGG23484, EGG23967	EFA77671, EFA79401, EFA81213, EFA81225, EFA81227, EFA84143
OG0000074				EGG19059, EGG20277	EFA74812, EFA75313, EFA77961, EFA77962, EFA78665, EFA81441, EFA81442, EFA81445, EFA83761, EFA84234, EFA84241, EFA84242, EFA84329, EFA84330, EFA84332, EFA84333, EFA84334, EFA84343, EFA84346, EFA84348, EFA84349, EFA85184, EFA85527, EFA86395, EFA86396
OG0000075		EGC31324, EGC31326, EGC31734, EGC35033, EGC40579	KYQ89117, KYQ90352, KYQ91098, KYQ91276, KYQ91966, KYQ93186, KYQ93583, KYQ99661, KYR00869, KYR01323, KYR01324, KYR01328, KYR01457, KYR01694, KYR01700, KYR01701, KYR01718, KYR01721, KYR01739, KYR01995, KYR02057, KYR02594
OG0000076	EAL63115, EAL68086, EAL68881, EAL73181	EGC28396, EGC28857, EGC29508, EGC31659, EGC32317, EGC33291, EGC34945, EGC34949, EGC34950, EGC36330, EGC36686, EGC36957, EGC37151, EGC37152, EGC38913, EGC39152, EGC39153	KYQ91294	EGG17684, EGG18637, EGG18784	EFA84035
OG0000077	EAL71226	EGC30389, EGC31347, EGC39523	KYQ88894, KYQ88895, KYQ88896, KYQ89216, KYQ91834, KYQ91835, KYQ91836, KYQ91945, KYQ91946, KYQ92151, KYQ92886, KYQ92887, KYQ93490, KYQ93491, KYR00010	EGG21736	EFA80257, EFA82562, EFA82592, EFA85577, EFA85585, EFA86509
OG0000078	EAL61784	EGC34323	KYQ99736	EGG15414, EGG15580, EGG15593, EGG15594, EGG15602, EGG15691, EGG15693, EGG15694, EGG15695, EGG15696, EGG15697, EGG15699, EGG15706, EGG17477, EGG19073, EGG19115, EGG20109, EGG20211, EGG21271, EGG23116, EGG24418	EFA85659
OG0000079				EGG15230, EGG16192, EGG16256, EGG16258, EGG16259, EGG16260, EGG16261, EGG16263, EGG16264, EGG16265, EGG16266, EGG16318, EGG16319, EGG16913, EGG18023, EGG18583, EGG18609, EGG19937, EGG20219, EGG24168, EGG24541, EGG24542, EGG25207, EGG25208, EGG25209
OG0000080		EGC28268, EGC28519, EGC28730, EGC28825, EGC29015, EGC29138, EGC29271, EGC29413, EGC30126, EGC30450, EGC30932, EGC31903, EGC32209, EGC32214, EGC32224, EGC32352, EGC32355, EGC32357, EGC32358, EGC32361, EGC33085, EGC34996, EGC35922, EGC39039, EGC39062
OG0000081	EAL60313, EAL60322, EAL60328, EAL60341, EAL60351, EAL61835, EAL68283, EAL71201, EAL73777, EAL73784, EAL73785, EAL73789, EAL73798, EAL73800, EAL73804, EAL73815, EAL73817, EAL73822, EAL73826, EAL73828, EAL73831, EAL73842, EAL73855, EAL73857
OG0000082	EAL62862, EAL62871, EAL62872, EAL64020, EAL64022, EAL64028, EAL65263, EAL67116, EAL69530, EAL71385, EAS66850	EGC28688, EGC29253, EGC34079, EGC35342, EGC36788, EGC36789, EGC37693, EGC39139	KYQ88210, KYQ89038, KYQ93105, KYQ96671, KYR00232
OG0000083	EAL73238	EGC38388	KYQ88236	EGG15069, EGG15153, EGG15209, EGG15210, EGG20230, EGG20275, EGG20278, EGG20289, EGG20290, EGG20300, EGG21108, EGG24837, EGG25020	EFA75474, EFA75747, EFA75962, EFA75963, EFA76054, EFA77937, EFA80706, EFA85193
OG0000084	EAL66069, EAL70204	EGC28763, EGC29624, EGC30714, EGC38582	KYQ92821, KYQ96730, KYR00509, KYR00510, KYR00511	EGG13398, EGG15618, EGG16688, EGG16689, EGG21426	EFA75507, EFA75510, EFA81217, EFA81218, EFA83731, EFA84331, EFA85152, EFA85316
OG0000085	EAL67781	EGC39326	KYQ88697, KYQ88707, KYQ89006, KYQ89008, KYQ89028, KYQ90020, KYQ90979, KYQ92004, KYQ92006, KYQ92008, KYQ94114, KYQ94178, KYQ94179, KYQ96776, KYQ99689, KYR00142, KYR02366, KYR02894, KYR02945, KYR02946	EGG18394	EFA81705
OG0000086	EAL65031	EGC28914, EGC29132, EGC29451, EGC29667, EGC29977, EGC30234, EGC31761, EGC32306, EGC32921, EGC34926, EGC35636, EGC36018, EGC36182, EGC37411, EGC37578, EGC37776, EGC38426, EGC38685, EGC39948, EGC40311	KYQ96674	EGG19416	EFA82455
OG0000087			KYQ88906, KYQ88907, KYQ93232	EGG13256, EGG14412, EGG14755, EGG14756, EGG14909, EGG15065, EGG15634, EGG15648, EGG16664, EGG16665, EGG18091, EGG18240, EGG18909, EGG19243, EGG19725, EGG20063, EGG22305, EGG22990, EGG24700, EGG24701	EFA77428
OG0000088		EGC33326, EGC34942, EGC34943, EGC35891		EGG15621, EGG15878, EGG15879, EGG15880, EGG15882, EGG15883, EGG15884, EGG15886, EGG15889, EGG15892, EGG15952, EGG15953, EGG15956, EGG16038, EGG17433, EGG17434, EGG17435, EGG17436, EGG20712, EGG20713
OG0000089					EFA74599, EFA75205, EFA75208, EFA76437, EFA77710, EFA78256, EFA78541, EFA78866, EFA78867, EFA79140, EFA79141, EFA81114, EFA81363, EFA83729, EFA83777, EFA83794, EFA83795, EFA85244, EFA85266, EFA85274, EFA85284, EFA85286, EFA85331, EFA86833
OG0000090	EAL63372, EAL69050	EGC32817, EGC37240, EGC37260, EGC37261, EGC37262	KYQ89780	EGG14629, EGG15540, EGG15541, EGG15542, EGG15569, EGG15596, EGG15598, EGG15599, EGG24687, EGG24984	EFA75298, EFA75814, EFA75817, EFA78766, EFA84663
OG0000091	EAL60462, EAL61780, EAL62974, EAL63018, EAL65785, EAL65874, EAL65875, EAL65876, EAL66142, EAL66972, EAL67108, EAL67284, EAL68736, EAL72980	EGC29530, EGC30830, EGC36272, EGC36521, EGC39701, EGC40598	KYQ90645	EGG21380, EGG22546
OG0000092	EAL70534, EAL70535, EAL70536, EAL70538, EAL70539, EAL70540, EAL70545, EAL70549, EAL70823, EAL70824, EAL70825, EAL70829, EAL70830, EAL70831, EAL70832, EAL70870, EAL70900, EAL71260, EAL71302, EAL73206, EAL73225, EAL73589	EGC31650
OG0000093	EAL64996	EGC31459	KYQ96766, KYR01563, KYR01898, KYR01901	EGG17743, EGG17745	EFA75263, EFA76841, EFA76842, EFA76843, EFA76863, EFA82611, EFA82612, EFA82947, EFA83906, EFA83909, EFA83910, EFA84365, EFA84366, EFA84367, EFA86437
OG0000094			KYQ91314, KYQ91585, KYQ92236	EGG16880, EGG16882, EGG16883	EFA79802, EFA80013, EFA80014, EFA80015, EFA80016, EFA80018, EFA80019, EFA80020, EFA80021, EFA80022, EFA80023, EFA80024, EFA80025, EFA80026, EFA84477, EFA84478, EFA84479
OG0000095	EAL63811, EAL71408, EAL71908, EAL72744, EAL72748, EAL72887	EGC29469, EGC29615, EGC29878, EGC31530, EGC35130		EGG17853, EGG18404, EGG18406, EGG18407, EGG21654, EGG23526	EFA83706, EFA83873, EFA84309, EFA84358, EFA84359
OG0000096	EAL61900, EAL63908, EAL64127, EAL66298, EAL67561, EAL72527, EAS66871	EGC30507, EGC32377, EGC36514, EGC36713, EGC39927, EGC39928, EGC39929, EGC39930, EGC40353	KYR00785	EGG20161, EGG20162	EFA76107, EFA79928, EFA85366
OG0000097	EAL64887, EAL68807, EAL70671, EAL70709, EAL71322, EAL71527, EAL73325, EAL73330	EGC30142, EGC30143, EGC32159, EGC32505, EGC32564, EGC32748, EGC32907, EGC33296, EGC34276, EGC36475, EGC38220, EGC38221, EGC38222, EGC40478
OG0000098	EAL61562, EAL64058, EAL69807, EAL69973, EAL70981, EAL73374	EGC28618, EGC31064, EGC32581, EGC33990, EGC33991, EGC34653, EGC37639, EGC37858, EGC39511, EGC39811	KYQ89100, KYQ89123, KYQ89195	EGG13670, EGG13671, EGG18715
OG0000099	EAL72884	EGC31967	KYQ94025, KYQ99953, KYR00227	EGG13864, EGG22138, EGG22139	EFA77346, EFA78266, EFA78292, EFA79132, EFA82651, EFA82654, EFA82696, EFA82699, EFA82701, EFA82748, EFA82850, EFA84204, EFA85915, EFA85917
OG0000100	EAL66568, EAL66570, EAL66890, EAL66893, EAL66896, EAL66897, EAL68670, EAL68671, EAL68673, EAL68674, EAL68675, EAL71757	EGC28972, EGC32290, EGC32298, EGC32595, EGC33618, EGC35962, EGC38257, EGC38491, EGC40599, EGC40618
OG0000101			KYQ88196, KYQ88388, KYQ88669, KYQ88715, KYQ89858, KYQ90447, KYQ92000, KYQ92690, KYQ93129, KYQ93297, KYQ93300, KYR00124, KYR01009, KYR01025, KYR01036, KYR01037, KYR01058, KYR01066, KYR01068, KYR01083, KYR01126, KYR03093
OG0000102			KYQ89834, KYQ89835, KYQ91555, KYQ91593, KYQ92165, KYR00388		EFA74747, EFA74748, EFA75109, EFA78444, EFA78445, EFA78508, EFA78535, EFA80159, EFA80362, EFA80475, EFA80841, EFA83161, EFA83450, EFA83694, EFA85377, EFA86138
OG0000103	EAL61891, EAL62522, EAL69362, EAL69611, EAL72975	EGC30181, EGC31830, EGC31932, EGC32835, EGC34741, EGC34797, EGC35959, EGC38244, EGC39210, EGC39211, EGC39212, EGC39420, EGC40110	KYQ90745	EGG17138	EFA85804
OG0000104	EAL70476, EAL70651, EAL70795, EAL70951, EAL71530, EAL71560, EAL71580, EAL73614	EGC31798, EGC31799, EGC31808, EGC31809, EGC34630, EGC35895	KYQ91977	EGG22242, EGG22279, EGG22378	EFA74630, EFA79649, EFA82406
OG0000105	EAL72943, EAL73059	EGC30329	KYQ93239	EGG16501, EGG16853, EGG16888, EGG16889, EGG16890, EGG16893, EGG16895, EGG16897, EGG16971, EGG17018, EGG17019, EGG19311, EGG19388, EGG22004, EGG24399, EGG24536	EFA84545
OG0000106	EAL64577, EAL64630, EAL64710, EAL64714, EAL69580, EAL72871	EGC39162	KYQ92063, KYQ92276, KYQ92280, KYQ92444, KYQ93247, KYR01062, KYR01148, KYR01149, KYR01277, KYR02584, KYR03158, KYR03159, KYR03162		EFA74697
OG0000107	EAL61108, EAL65750	EGC30290, EGC33553, EGC34511, EGC38318, EGC38850, EGC39466	KYQ88371, KYQ90905, KYQ91488, KYQ94493, KYQ94494, KYR01432	EGG15152, EGG15154, EGG19546, EGG22680	EFA75130, EFA75131, EFA75184
OG0000108	EAL69967	EGC30488, EGC34711, EGC34927, EGC34928, EGC35950, EGC37291, EGC40510	KYQ93172	EGG13533	EFA78704, EFA78706, EFA78707, EFA78777, EFA78805, EFA82578, EFA82579, EFA82580, EFA82581, EFA84684, EFA85258
OG0000109	EAL65531, EAL65638, EAL66391, EAL67871	EGC30858, EGC35987, EGC35988	KYQ92467, KYQ93114, KYQ94329, KYQ96735, KYR02843, KYR02999, KYR03001	EGG17401, EGG17402, EGG22519, EGG22520	EFA75082, EFA81099, EFA82200
OG0000110	EAL67779	EGC39090	KYQ91215	EGG20849, EGG25052	EFA75104, EFA79570, EFA80296, EFA81872, EFA82309, EFA82320, EFA82321, EFA82345, EFA82349, EFA82383, EFA82398, EFA82399, EFA82422, EFA82427, EFA82912, EFA85256
OG0000111		EGC37096	KYQ89130, KYR00683, KYR01289	EGG14619, EGG15066, EGG15067, EGG15206, EGG15207, EGG15211, EGG15212, EGG15213, EGG15214, EGG20833, EGG20882, EGG22432, EGG22769, EGG22791, EGG22826, EGG22842	EFA77380
OG0000112				EGG15380, EGG15381, EGG15382, EGG15383, EGG15461, EGG15463, EGG15465, EGG15466, EGG15487, EGG15488, EGG15489, EGG15490, EGG15493, EGG15494, EGG15495, EGG15507, EGG15614, EGG15615, EGG15616	EFA78112, EFA80097
OG0000113	EAL63209, EAL64006, EAL64331, EAL67909, EAL68294, EAL70525, EAL70846	EGC28910, EGC31281, EGC32074, EGC33844	KYQ92567, KYQ92991	EGG17944	EFA75934, EFA76092, EFA79241, EFA80459, EFA85560, EFA86780
OG0000114	EAL60627, EAL61205, EAL62608, EAL64192, EAL66237, EAL66706, EAL66721, EAL66850, EAL66919, EAL68591, EAL68723, EAL68836, EAL69116, EAL69398, EAL69400, EAL72181, EAL72825, EAL72864, EAL73321		KYQ92841
OG0000115	EAL72453	EGC28259, EGC29020, EGC29247, EGC30299, EGC30498, EGC31296, EGC32544, EGC33534, EGC33633, EGC34428, EGC37121, EGC37284, EGC38152, EGC38330, EGC38359, EGC38594, EGC38596, EGC39706, EGC39908
OG0000116	EAL61570, EAL61589, EAL66579, EAL66815, EAL66855, EAL66857, EAL66862, EAL66864, EAL67165, EAL67168, EAL67170, EAL67327, EAL69139, EAL69141, EAL69143, EAL69144	EGC29999, EGC33548, EGC36509, EGC39886
OG0000117	EAL61095, EAL68589	EGC39614	KYQ88421, KYQ88916, KYQ91066, KYQ92247, KYR02162	EGG13706, EGG14413, EGG15894, EGG18090, EGG21153, EGG24346, EGG24352	EFA76485, EFA76894, EFA77639, EFA79858, EFA86282
OG0000118	EAL60734		KYQ88655, KYQ88909, KYQ93233	EGG14411, EGG14753, EGG15643, EGG15788, EGG18092, EGG18238, EGG18239, EGG18910, EGG18911, EGG19244, EGG19245, EGG19726, EGG19727, EGG24697, EGG24698	EFA77429
OG0000119			KYQ94119, KYR01102	EGG13900, EGG14147, EGG14427, EGG15263, EGG16068, EGG16328, EGG17712, EGG17848, EGG17851, EGG18359, EGG19128, EGG22191, EGG22932, EGG24163, EGG24506, EGG24507	EFA75681, EFA80977
OG0000120			KYQ89389, KYQ89940, KYQ90402, KYQ90403, KYQ93192, KYQ93526, KYR01326, KYR02806	EGG14771, EGG17317, EGG17359, EGG17597, EGG17598, EGG21249, EGG22228	EFA75174, EFA76334, EFA78963, EFA82564, EFA85384
OG0000121			KYQ88409, KYQ88538, KYQ90400, KYQ90401, KYQ93435	EGG13622, EGG16481, EGG17891, EGG19080, EGG20387, EGG20388, EGG20700, EGG23491, EGG23492	EFA75574, EFA75876, EFA78967, EFA79008, EFA82196, EFA82197
OG0000122			KYQ89864, KYQ89865, KYQ89866, KYQ89867, KYQ89868, KYQ91640, KYQ92307, KYQ92310, KYQ94166, KYR00789, KYR00791, KYR01400, KYR02121, KYR02122, KYR02152, KYR02732, KYR02733, KYR02734, KYR02735, KYR02736
OG0000123	EAL63328, EAL63329, EAL63350, EAL63396, EAL63749	EGC32283, EGC37257	KYQ88363, KYQ94443	EGG17106, EGG17107, EGG17673, EGG17674	EFA75319, EFA75358, EFA75410, EFA75411, EFA75414, EFA77617
OG0000124	EAL62523, EAL63634, EAL63655, EAL66180, EAL68607, EAL68610, EAL68627, EAL68637, EAL68638, EAL68639, EAL68640, EAL68641, EAL68643, EAL68644, EAL68645, EAL68646, EAL68647, EAL68648, EAL68837
OG0000125	EAL63433, EAL67112, EAL67118	EGC30424, EGC31218, EGC36315	KYQ91604, KYQ91910, KYQ93968, KYR02675, KYR02983		EFA79381, EFA80852, EFA80853, EFA80854, EFA81380, EFA81382, EFA84311, EFA85271
OG0000126	EAL60601, EAL62812, EAL62818, EAL67700	EGC31758, EGC39242	KYQ91471, KYQ93342, KYQ93962	EGG14660, EGG17709, EGG17726, EGG19681	EFA76885, EFA76886, EFA76887, EFA76938, EFA82292, EFA82293
OG0000127	EAL62683, EAL62696, EAL66697, EAL72919, EAL72920, EAL73046, EAL73051	EGC34739, EGC37184	KYQ88958, KYQ94211	EGG15163, EGG15164, EGG16234, EGG19854, EGG19855, EGG19861	EFA85442, EFA85443
OG0000128	EAL64800, EAL67458, EAL69628, EAL71978, EAL71980, EAL71985, EAL73549	EGC30359, EGC31918, EGC32969, EGC34060, EGC40232	KYQ88182, KYQ91211, KYQ91247, KYQ91248, KYQ92712	EGG17174	EFA84970
OG0000129	EAL64005, EAL64077, EAL66089, EAL66090, EAL71274, EAS66931	EGC34443, EGC34445	KYR00378, KYR02853, KYR02863, KYR02864, KYR02865	EGG16035	EFA76058, EFA78986, EFA78987, EFA82117, EFA83318
OG0000130	EAL61576, EAL69836, EAL69906, EAL69907, EAL69908, EAL71225	EGC30213, EGC33065, EGC33069, EGC35729, EGC37345	KYQ91167, KYQ91168, KYR01611	EGG18234	EFA76509, EFA80684, EFA81676, EFA86532
OG0000131	EAL64753, EAL69894, EDR41087	EGC31245, EGC32844, EGC35197, EGC35544, EGC38822	KYQ89138	EGG14784, EGG21276, EGG22045	EFA80997, EFA82866, EFA82867, EFA82868, EFA82869, EFA82870, EFA85842
OG0000132	EAL64190, EAL65249, EAL66823, EAL66824	EGC29754, EGC29973, EGC34998, EGC36691, EGC36692, EGC39512, EGC39513	KYQ91358, KYQ96856, KYQ99979	EGG15664, EGG19303	EFA76934, EFA76935, EFA85761
OG0000133	EAL64699, EAL66853			EGG14840, EGG15387, EGG16712, EGG16756, EGG16813, EGG16814, EGG16818, EGG16819, EGG19249, EGG20207, EGG22268, EGG24620, EGG24622, EGG24623, EGG24626, EGG25163	EFA83611
OG0000134	EAL64465	EGC38093	KYR01942	EGG17114, EGG19348, EGG19349, EGG19808, EGG19866, EGG19890, EGG19891, EGG19892, EGG19893, EGG20238, EGG20390, EGG23548	EFA75352, EFA77351, EFA79308, EFA85392
OG0000135			KYQ92874	EGG15932, EGG16043, EGG16051, EGG16056, EGG16057, EGG16058, EGG17732, EGG19051, EGG19092, EGG19124, EGG19852, EGG24627	EFA76956, EFA80755, EFA81307, EFA83916, EFA84621, EFA86117
OG0000136				EGG24378	EFA75536, EFA75537, EFA75538, EFA75539, EFA75547, EFA75566, EFA75568, EFA75569, EFA75591, EFA75854, EFA75988, EFA76623, EFA79317, EFA82927, EFA84673, EFA84723, EFA85597, EFA86505
OG0000137			KYQ88216, KYQ90460, KYQ91821, KYQ91825, KYQ92188, KYQ93096, KYQ94497, KYQ96820, KYR02698, KYR03055	EGG18438, EGG24783	EFA74617, EFA75744, EFA76308, EFA77886, EFA78733, EFA78811, EFA82041
OG0000138			KYR03086	EGG13539, EGG13540, EGG13553, EGG13554, EGG13555, EGG13558, EGG13564, EGG13565, EGG13566, EGG13567, EGG13570, EGG13571, EGG14501, EGG14502, EGG14640, EGG18455, EGG21820, EGG22423
OG0000139		EGC28767, EGC28768	KYQ89486, KYQ89487, KYQ89492	EGG13849	EFA77757, EFA77758, EFA79812, EFA79813, EFA79815, EFA79816, EFA79830, EFA79831, EFA79834, EFA79835, EFA82643, EFA82645, EFA82646
OG0000140			KYQ88305, KYQ88551, KYQ88567, KYQ89261, KYQ89263, KYQ90214, KYQ90317, KYQ90826, KYQ90903, KYQ91968, KYQ92060, KYQ92153, KYQ96668, KYQ99674, KYR01795, KYR02185, KYR02273	EGG14894, EGG22824
OG0000141			KYQ92558, KYQ92559, KYQ92584, KYQ92585, KYQ92586	EGG19491, EGG19502, EGG19503, EGG19504, EGG19505, EGG19506, EGG19507, EGG19527, EGG19528, EGG19529, EGG23308	EFA76614, EFA77019, EFA77145
OG0000142			KYQ88623, KYQ90365, KYQ90366, KYQ91434, KYQ91435, KYQ91794, KYQ91795, KYQ93635, KYQ93636, KYQ94120, KYR00217, KYR00218, KYR00219, KYR00242, KYR00243, KYR00244, KYR01601, KYR02523, KYR02605
OG0000143		EGC30966, EGC33216, EGC33232, EGC34062, EGC36548, EGC36971, EGC36973, EGC38829	KYQ88394, KYQ88833, KYQ90639, KYQ90640, KYQ93116, KYQ94134, KYR02692, KYR02896, KYR03000		EFA75073, EFA81726
OG0000144		EGC28477, EGC30967, EGC31860, EGC32318, EGC35144, EGC35577, EGC35578, EGC35981, EGC35982, EGC36568, EGC36629, EGC36825, EGC37737, EGC37747, EGC38411, EGC38592, EGC39120, EGC40265, EGC40267
OG0000145		EGC28485, EGC28615, EGC29013, EGC30106, EGC30934, EGC30935, EGC31683, EGC32348, EGC32349, EGC33078, EGC35321, EGC35323, EGC35325, EGC37418, EGC39037, EGC39933, EGC40134, EGC40420, EGC40421
OG0000146	EAL61947, EAL62052, EAL62844, EAL72588, EAL72671, EAL72672, EAL72703, EAL72774, EAL72775, EAL72829, EAL73261	EGC30100, EGC30577, EGC30627, EGC31528, EGC31731, EGC35002, EGC36440
OG0000147	EAL60486, EAL65801, EAL66220, EAL67416, EAL68966, EAL69935, EAL70477, EAL70638, EAL70802, EAL71074, EAL71142, EAL71143, EEU04058	EGC29174, EGC30068, EGC34283, EGC37645, EGC37889
OG0000148	EAL61060, EAL61713, EAL61741, EAL61795, EAL61817, EAL61818, EAL62661, EAL65799, EAL65802, EAL65808, EAL65863, EAL69623, EAL70005, EAL73280, EAL73595, EAL73605, EAL73698				EFA75702
OG0000149	EAL62061, EAL62062, EAL68223, EAL71004, EAS66958	EGC33061, EGC33062	KYQ91615, KYQ91616, KYR00444, KYR02979	EGG16166, EGG16340, EGG21310, EGG24566	EFA80074, EFA81581, EFA81819
OG0000150	EAL60970, EAL60971, EAL61030, EAL64842, EAL64854, EAL64860, EAL66408, EAL73641	EGC31413		EGG16041, EGG18488, EGG22377	EFA74511, EFA79559, EFA79642, EFA79956, EFA85676, EFA85799
OG0000151	EAL70619, EAL70642, EAL70803, EAL70884, EAL71131, EAL72166, EAL72797	EGC31966, EGC33620, EGC36164, EGC40428, EGC40433	KYQ90869	EGG13830, EGG20746, EGG21787	EFA84307, EFA84308
OG0000152	EAL64579, EAL64711, EAL65720, EAL71309, EAL71321, EAL71328, EAL71409, EAL71412, EAL71603, EAL72664	EGC30463, EGC30760, EGC32530, EGC37293, EGC38075, EGC39423	KYQ88809		EFA76928
OG0000153	EAL61294, EAL65653, EAL65654, EAL65675	EGC29282, EGC40034	KYQ89084, KYQ89085, KYQ91383	EGG14177, EGG19076, EGG19082, EGG19185, EGG22749, EGG22750	EFA75133, EFA75134, EFA75135
OG0000154	EAL61109, EAL65959	EGC28746, EGC28747, EGC30448, EGC30538, EGC30539, EGC30540, EGC30541, EGC30542, EGC30543, EGC31211, EGC32121, EGC33297, EGC34944, EGC34987, EGC36176, EGC40271
OG0000155	EAL60571		KYQ93474, KYQ99907, KYR01063	EGG13341, EGG17687, EGG17828, EGG18928, EGG20730	EFA76007, EFA76645, EFA76646, EFA77503, EFA77504, EFA77509, EFA80425, EFA83774, EFA83775
OG0000156	EAL65940, EAL65954	EGC28441, EGC35644, EGC37789, EGC37790, EGC40138	KYQ89784, KYQ89785, KYQ92299, KYQ93029, KYQ99792, KYR01971, KYR01972	EGG19910	EFA74765, EFA74766, EFA78001
OG0000157				EGG14223, EGG15012, EGG15013, EGG15087, EGG15156, EGG15439, EGG15509, EGG16423, EGG17155, EGG17727, EGG18255, EGG18663, EGG18913, EGG20322, EGG21043, EGG21242, EGG22529, EGG24121
OG0000158			KYQ88862, KYQ88863, KYQ88864, KYQ89241, KYQ89477, KYQ89500, KYR03014	EGG16830, EGG16831, EGG17149, EGG23110, EGG23428, EGG24243, EGG24244, EGG24245, EGG24246, EGG24247	EFA85808
OG0000159		EGC28447, EGC30660, EGC31864, EGC32100, EGC32629, EGC32999, EGC34194, EGC34195, EGC34975, EGC35320, EGC38647, EGC38860, EGC39032, EGC39033, EGC39034, EGC40553		EGG24439	EFA76224
OG0000160	EAL60372, EAL73848, EAL73850		KYQ89041, KYQ89042		EFA74614, EFA75789, EFA76600, EFA77127, EFA77462, EFA78950, EFA79753, EFA83192, EFA85584, EFA85602, EFA85613, EFA86210
OG0000161	EAL60909, EAL63680, EAL63959, EAL67675, EAL71566, EDR41088	EGC30065, EGC31154, EGC32476, EGC35402	KYQ93776, KYR00359, KYR01797	EGG14507	EFA79273, EFA84083, EFA86481
OG0000162	EAL61525, EAL62287, EAL62288, EAL62408, EAL64843, EAL66318, EAL68478, EAL70318, EAL72153, EAL72637, EAL72755, EAL73694, EAS66942, EDR41023	EGC36638, EGC37436	KYR03156
OG0000163	EAL60781, EAL60782, EAL60783, EAL60784, EAL60785, EAL60787, EAL60792, EAL61238, EAL61967, EAL61968, EAL61988, EAL67795, EAL67796, EAL67797, EAL71009, EAL71266, EAL72259
OG0000164	EAL73672, EAL73845	EGC29395, EGC33201, EGC40293	KYR02168	EGG14809, EGG19749, EGG20791, EGG20938, EGG20939, EGG21726	EFA76702, EFA82744, EFA84433, EFA84913, EFA85938
OG0000165	EAL68970, EAL69290, EAL73375, EAL73376	EGC32116, EGC32117, EGC34608, EGC39116	KYQ89178	EGG17523, EGG20430, EGG21536, EGG21819	EFA74732, EFA84776, EFA85180, EFA86475
OG0000166	EAL60805, EAL68135, EAL73668	EGC34697, EGC37360	KYQ91166, KYQ93685, KYQ96823, KYQ99890	EGG13469, EGG19237, EGG20138, EGG21425	EFA75966, EFA80785, EFA81412, EFA82893
OG0000167	EAL68538, EAL68550, EAL68578, EAL68962, EAL68964, EAL73507, EAS66902	EGC30409, EGC30701, EGC30702, EGC32778, EGC34451, EGC35123, EGC35758		EGG15001, EGG24160	EFA79644
OG0000168	EAL63888, EAL63976, EAL70042, EAL72201, EAL72652, EEU04146	EGC29526			EFA74592, EFA77381, EFA77744, EFA78067, EFA78875, EFA84967, EFA85060, EFA85120, EFA86306, EFA86712
OG0000169	EAL61352	EGC34651	KYQ94099	EGG24579	EFA74950, EFA76431, EFA76448, EFA76460, EFA80645, EFA82121, EFA83959, EFA83992, EFA84012, EFA84624, EFA84928, EFA84980, EFA86533
OG0000170	EAL65711		KYR02319	EGG19584, EGG19587, EGG20344, EGG20349, EGG22238, EGG22240, EGG22247, EGG22249, EGG22457, EGG23216, EGG23582, EGG23584, EGG23611, EGG25138	EFA79490
OG0000171	EAL65484, EAL65485, EAL65578	EGC38630	KYQ89347, KYQ89348, KYQ89349, KYQ93079, KYR00593, KYR00602, KYR00603, KYR00639, KYR01065	EGG15985, EGG21966, EGG25051	EFA78990
OG0000172	EAL63897, EAL64079, EAL64080, EAL64087	EGC30651, EGC31558	KYQ89132, KYR00786, KYR00838	EGG22068, EGG22528	EFA75435, EFA76565, EFA80921, EFA82173, EFA82185, EFA85472
OG0000173			KYR01951, KYR01957, KYR01977	EGG13409, EGG13549, EGG13551, EGG13557, EGG14452, EGG16032, EGG16100, EGG16721, EGG16722, EGG16724, EGG17567, EGG18130, EGG19105, EGG19107
OG0000174		EGC39521	KYQ88333, KYQ90829, KYQ94044, KYQ96732	EGG13532, EGG16681, EGG20724, EGG20725, EGG20726, EGG21221, EGG21656, EGG22831, EGG22925, EGG24545	EFA74715, EFA75596
OG0000175				EGG17669	EFA75776, EFA76315, EFA76316, EFA76317, EFA76318, EFA76549, EFA77522, EFA78116, EFA78122, EFA79801, EFA80470, EFA82053, EFA83426, EFA84259, EFA84260, EFA84263
OG0000176			KYQ90988, KYQ93425, KYR00754, KYR02379, KYR02411	EGG19687, EGG20381, EGG20431, EGG21250, EGG22164	EFA74734, EFA78330, EFA82267, EFA84109, EFA85744, EFA86068, EFA86686
OG0000177			KYQ88184, KYQ88465, KYQ88832, KYQ89513, KYQ94153, KYQ94496, KYQ99644, KYQ99645, KYR00044, KYR00974, KYR01426, KYR01435, KYR01440, KYR01602, KYR01868, KYR02563, KYR02590
OG0000178			KYQ99777		EFA75436, EFA77848, EFA77874, EFA77875, EFA78518, EFA78530, EFA78632, EFA78642, EFA78644, EFA78645, EFA78654, EFA78678, EFA82535, EFA83899, EFA84914, EFA85397
OG0000179		EGC35348			EFA75094, EFA75120, EFA75121, EFA75122, EFA75123, EFA75176, EFA75177, EFA77348, EFA79336, EFA79362, EFA82033, EFA82462, EFA82988, EFA83829, EFA85434, EFA86074
OG0000180	EAL60315, EAL60316, EAL60362, EAL64178, EAL67240, EAL68828, EAL71858		KYQ88160, KYQ88897, KYQ88900, KYQ88949, KYQ88975, KYQ93494		EFA75925, EFA75926, EFA76153
OG0000181	EAL61698, EAL61730, EAL61770, EAL61789, EAL61799, EAL62237, EAL63701, EAL63702, EAL63707, EAL63711, EAL63896, EAL68821	EGC28838, EGC28839	KYQ91496		EFA74753
OG0000182	EAL62066, EAL63198, EAL63231, EAL63251, EAL65936, EAL68887, EAL68889, EAL70565, EAL70810, EAL71635, EAL71709, EAL71717, EAL71859, EAL71860, EAL71861	EGC32103
OG0000183	EAL63155, EAL65292, EAL65293, EAL65327, EAL66598, EAL72020	EGC31019, EGC31464, EGC33251, EGC37425, EGC37426, EGC40401, EGC40547	KYQ90654, KYQ93801, KYQ93882
OG0000184	EAL62908, EAL62909, EAL71550, EAL71600	EGC28979, EGC29306, EGC33956, EGC33957, EGC34583, EGC36420	KYR00031, KYR01319	EGG20048	EFA81010, EFA85020, EFA86570
OG0000185	EAL60449, EAL62782, EDR41123	EGC29893, EGC32122, EGC36904, EGC39531	KYQ92756, KYR02488, KYR02939	EGG16489, EGG16671, EGG17043	EFA77311, EFA79332, EFA83904
OG0000186	EAL62475, EAL62476, EAL62478, EAL62601, EAL62620, EAL71694	EGC31147, EGC36796	KYQ90323, KYQ93177, KYQ93178	EGG16275	EFA74770, EFA81429, EFA82968, EFA85885
OG0000187	EAL61360, EAL62481, EAL62482, EAL62533, EAL62553, EAL62554, EAL62555, EAL64784, EAL64841, EAL64947, EAL65728, EAL66319, EAL71898, EAL72310, EAL73669	EGC35370
OG0000188	EAL61930, EAL62464, EAL64153, EAL64688, EAL64691, EAL65460, EAL65723, EAL65749, EAL66052, EAL70517, EAL70840, EAL73323	EGC29273, EGC29274, EGC31540, EGC36380
OG0000189	EAL62181, EAL73705	EGC34752, EGC37583, EGC37587	KYQ93110, KYQ93117, KYQ93119, KYQ93487, KYR02917	EGG13324, EGG20336, EGG20341	EFA80970, EFA81451, EFA82922
OG0000190	EAL61882, EAL67215, EAL71121	EGC29525, EGC31601, EGC32083, EGC39695	KYQ90573, KYQ91929	EGG18976, EGG23630, EGG25328	EFA74607, EFA75019, EFA78674, EFA84779
OG0000191	EAL60720, EAL69953, EAL73171	EGC30600, EGC31376, EGC32058, EGC35447, EGC37880	KYR01293, KYR01666, KYR02252	EGG19447, EGG24652, EGG24684	EFA79499, EFA79500
OG0000192	EAL71199, EAL71386, EAL73390	EGC34258, EGC34259, EGC36909, EGC38988, EGC38989, EGC40284	KYQ90870, KYR00681	EGG15379, EGG23769	EFA80788, EFA80816, EFA83958
OG0000193	EAL66039, EAL67684, EAL71910	EGC29473, EGC29923, EGC32294	KYQ90613, KYQ92604, KYQ92617	EGG16656, EGG19645, EGG19930, EGG22428	EFA76366, EFA84025, EFA85952
OG0000194	EAL66841, EAL72358, EAL72359	EGC34673, EGC38274	KYQ93611	EGG20801, EGG21223, EGG21224, EGG21316	EFA74591, EFA74954, EFA77533, EFA79567, EFA85347, EFA86476
OG0000195	EAL60556, EAL67608	EGC28579, EGC32440, EGC35493	KYQ90844, KYQ99874, KYR01600	EGG14392, EGG16503, EGG16504, EGG20033	EFA75445, EFA78631, EFA86343, EFA86344
OG0000196				EGG15462, EGG16894, EGG19853, EGG21235, EGG21236, EGG21237, EGG22033, EGG22034, EGG22042, EGG22043, EGG22290, EGG22295, EGG23920, EGG24986	EFA81617, EFA81618
OG0000197				EGG17884, EGG19333, EGG19399, EGG24296, EGG24898	EFA75044, EFA77450, EFA77459, EFA78402, EFA82256, EFA82890, EFA84009, EFA84580, EFA84631, EFA85303, EFA85314
OG0000198				EGG21387, EGG22014, EGG22015, EGG22017, EGG22018, EGG22019, EGG22020, EGG22021, EGG22022, EGG22023, EGG22028, EGG22029, EGG22260, EGG22452, EGG22453, EGG24551
OG0000199	EAL62359, EAL62360, EAL63567, EAL67448, EAL67450	EGC30891, EGC31150, EGC31491, EGC35426	KYR00486, KYR00487, KYR00488	EGG14428, EGG14535	EFA76055
OG0000200	EAL63173, EAL64593, EAL68769, EAL69168, EAL71029, EAL72643	EGC31836, EGC37985		EGG15543, EGG18324, EGG20733	EFA75677, EFA75936, EFA76588, EFA86621
OG0000201	EAL61494, EAL62704, EAL66044, EAL66269, EAL67635, EAL72079	EGC36453, EGC40029	KYQ93442	EGG13329, EGG15534, EGG15573	EFA79973, EFA82486, EFA85994
OG0000202	EAL62536		KYQ92574, KYQ93218, KYQ93308, KYQ93579, KYQ93580, KYQ99787, KYR01410, KYR02017, KYR02045, KYR02047	EGG14580, EGG23305, EGG23514	EFA83525
OG0000203	EAL60737, EAL60881, EAL60977, EAL61137, EAL62215, EAL64617, EAL64913, EAL66550	EGC30982, EGC30983, EGC33134, EGC34123, EGC36399, EGC37074, EGC39402
OG0000204	EAL63907, EAL73258	EGC39777	KYQ89713, KYQ91141, KYR02038	EGG14257, EGG17403, EGG20261	EFA81877, EFA81918, EFA83050, EFA83260, EFA86262, EFA86732
OG0000205	EAL73558			EGG14573, EGG14715, EGG15240, EGG15849, EGG16149, EGG16746, EGG17866, EGG17867, EGG18136, EGG18137, EGG18221, EGG20550, EGG20869, EGG22026
OG0000206	EAL68604, EAL72226		KYQ88956, KYQ89250, KYQ90047, KYQ90626, KYR00542, KYR00628, KYR01549, KYR01860	EGG15992, EGG19764, EGG21306	EFA75064, EFA82057
OG0000207	EAL61319, EAL61320, EAL61321, EAL61322, EAL61629, EAL69987, EAL72494, EAL72495, EAL72496, EAL72497	EGC28936, EGC32448	KYQ93885	EGG21273	EFA83139
OG0000208	EAL71906, EAL71907, EEU04155	EGC30447, EGC30792, EGC30938, EGC31365, EGC31791, EGC31880, EGC33007, EGC37397, EGC39047	KYR00878	EGG20518	EFA80744
OG0000209	EAL61291, EAL68139	EGC33225, EGC33226, EGC33227, EGC37346, EGC37844	KYQ93280, KYQ93281, KYQ93282	EGG17831, EGG19047, EGG23639	EFA75587, EFA75588
OG0000210	EAL60973, EAL61033, EAL67596, EAL67638	EGC32436, EGC32437, EGC33891, EGC33892	KYR01592, KYR01593, KYR01594, KYR01595	EGG14442, EGG14879	EFA80846
OG0000211	EAL66833, EAL69081, EAL71291, EAL71393, EAL71569	EGC28279, EGC29948, EGC35406, EGC36510, EGC38063, EGC40429, EGC40432	KYR01162, KYR01705	EGG23104
OG0000212	EAL66913, EAL68372, EAL68383, EAL68384, EAL68391, EAL68392	EGC28898, EGC29895, EGC29899, EGC32011, EGC33446, EGC36830, EGC37923, EGC38071	KYR02350
OG0000213	EAL68516	EGC28852, EGC33218, EGC33410, EGC33414, EGC36231, EGC36996, EGC36997, EGC36998, EGC36999, EGC37000, EGC39640	KYR00177	EGG18648	EFA77326
OG0000214	EAL66867, EAL67037, EAL67093, EAL67157, EAL67158	EGC30522, EGC30523, EGC30524, EGC32233, EGC32234		EGG16726, EGG16727, EGG21899, EGG21900, EGG21901
OG0000215	EAL64398, EAL66243	EGC28748	KYQ91415, KYQ91416, KYQ93872, KYR01706, KYR02169		EFA75896, EFA76427, EFA78133, EFA78134, EFA81530, EFA84905, EFA86411
OG0000216	EAL64436	EGC28484, EGC28729, EGC28788, EGC29806, EGC30444, EGC30657, EGC31600, EGC34148, EGC35864, EGC38545, EGC39045	KYQ92689	EGG16003	EFA85370
OG0000217	EAL64259	EGC32015	KYQ89440, KYQ90282, KYQ90327, KYQ91853, KYQ91855, KYQ91963	EGG15677, EGG15700, EGG16984, EGG18080, EGG22594, EGG23091	EFA83846
OG0000218				EGG15399, EGG16410, EGG25046	EFA75429, EFA75430, EFA76548, EFA76760, EFA77398, EFA78959, EFA79408, EFA79643, EFA79974, EFA79975, EFA80505, EFA86500
OG0000219		EGC29688, EGC29690, EGC33039, EGC33394, EGC33407, EGC35847, EGC35850, EGC35851, EGC36366, EGC36534		EGG13920, EGG25286	EFA74884, EFA74886, EFA81402
OG0000220				EGG13638, EGG13645, EGG13648, EGG14369, EGG14522, EGG14523, EGG17004, EGG17006, EGG17207, EGG19541, EGG20552, EGG21923, EGG23597, EGG25292	EFA85066
OG0000221		EGC39117	KYQ88622, KYQ90364, KYQ91151, KYQ91436, KYQ91796, KYQ93634, KYQ93825, KYQ93826, KYQ93839, KYR00051, KYR00220, KYR02441, KYR02606	EGG16769
OG0000222		EGC28397, EGC28927, EGC30724, EGC31909, EGC32211, EGC32511, EGC32517, EGC32649, EGC32935, EGC33267, EGC35293, EGC36167, EGC39344, EGC39658, EGC40281
OG0000223					EFA75533, EFA77650, EFA80310, EFA80328, EFA81204, EFA81272, EFA82499, EFA83024, EFA83845, EFA84135, EFA84180, EFA85553, EFA85795, EFA86133, EFA86142
OG0000224	EAL60893, EAL63781, EAL63994, EAL67818	EGC35764, EGC37066, EGC39310, EGC40132	KYQ90340, KYQ90815, KYR02282, KYR03100	EGG22825, EGG22928
OG0000225	EAL63244, EAL63253, EAL63563	EGC30875, EGC39989	KYQ89856, KYQ92889, KYQ96705	EGG15865, EGG15868, EGG20851	EFA74787, EFA77361, EFA81600
OG0000226	EAL60960, EAL60961, EAL60962, EAL60963, EAL63340	EGC29419, EGC40285	KYR01004	EGG13402, EGG20292, EGG22207	EFA83271, EFA85682, EFA85683
OG0000227	EAL63347, EAL64389, EAL69356	EGC29972, EGC39091	KYR02899, KYR02928	EGG16970, EGG17912, EGG18063, EGG20281, EGG20581	EFA76119, EFA76289
OG0000228	EAL60514, EAL60515, EAL62512, EAL66155, EAL69787	EGC32413, EGC35118, EGC36938, EGC36939, EGC37638, EGC37718	KYQ89184, KYQ92313, KYQ94304
OG0000229	EAL62465, EAL64387, EAL64394, EAL67094, EAL67095, EAL67096, EAL67171	EGC29570, EGC31581, EGC33846, EGC40186	KYQ93025		EFA86483, EFA86484
OG0000230	EAL72769, EAL72896, EAL73153	EGC28934, EGC39215	KYQ92215, KYR02515	EGG13659, EGG19135, EGG20599	EFA74871, EFA76639, EFA82979, EFA83331
OG0000231	EAL64521, EAL69483, EAL70098, EAL70099, EAL70208, EAL70209, EAL70210, EAL70211, EAL70367, EAL71049, EAL73110, EAL73580, EAL73581, EAL73759
OG0000232	EAL63993, EAL67359, EAL72010	EGC32001		EGG13928, EGG15317	EFA76657, EFA83877, EFA83878, EFA83879, EFA84267, EFA84576, EFA84857, EFA84858
OG0000233	EAL61611, EAL67964	EGC30924, EGC34215, EGC34909, EGC35574	KYQ90304, KYQ99713	EGG16146, EGG17001, EGG18144	EFA76994, EFA76995, EFA77070
OG0000234	EAL61720, EAL65523, EAL66854, EAL67164, EEU04046	EGC33951, EGC38609	KYQ92164	EGG16777	EFA75291, EFA75311, EFA77672, EFA83363, EFA85853
OG0000235	EAL61538, EAL67198, EAL69002	EGC34915, EGC36099, EGC36100	KYQ94357, KYQ99748	EGG17291, EGG20029, EGG22715, EGG22716	EFA86216, EFA86217
OG0000236	EAL61216, EAL65999, EAL66001, EAL69012, EAL70526, EAL70572, EAL70867, EAL70871	EGC33142, EGC37628	KYQ91770, KYR02778	EGG17535	EFA77314
OG0000237	EAL61088	EGC39626	KYQ88201	EGG16690, EGG18170, EGG19280, EGG19281, EGG19282, EGG19391, EGG20944, EGG22036, EGG22836, EGG24267	EFA80437
OG0000238	EAL60844, EAL68261	EGC29537, EGC29869, EGC29870, EGC29871, EGC34392, EGC34393		EGG14189, EGG20601, EGG20603, EGG20744	EFA75387, EFA76993
OG0000239	EAL60714, EAL66139	EGC31257, EGC38724, EGC38726, EGC38727	KYQ99998	EGG17548, EGG18270	EFA76819, EFA76874, EFA76932, EFA83061, EFA83215
OG0000240	EAL60452, EAL60454, EAL66077, EAL66079, EAL66080, EAL66081, EAL66082	EGC30395	KYQ91016, KYQ91100	EGG15747, EGG24209	EFA86339, EFA86341
OG0000241	EAL71432	EGC28621, EGC31857, EGC33221, EGC33331, EGC36654, EGC36890, EGC36930, EGC36933, EGC36934, EGC37640, EGC38722, EGC38749, EGC40384
OG0000242	EAL70987, EAL71096			EGG13679, EGG13683, EGG13687, EGG13691, EGG13692, EGG13713, EGG19163, EGG19164, EGG19165, EGG19166, EGG22804	EFA78634
OG0000243	EAL71127	EGC32995	KYR00166	EGG13359, EGG14085, EGG15731, EGG22887, EGG22890, EGG22892	EFA84983, EFA85663, EFA85665, EFA85666, EFA85670
OG0000244	EAL69878	EGC33793			EFA75132, EFA75284, EFA75286, EFA77996, EFA77997, EFA78622, EFA81201, EFA83326, EFA84500, EFA84501, EFA85265, EFA86006
OG0000245	EAL63872, EAL63984, EAL66091, EAL66141, EAL67724, EAL69244	EGC29232, EGC30207, EGC39417, EGC39429, EGC40491	KYQ92044	EGG18679	EFA79248
OG0000246	EAL68788	EGC39287	KYR01990, KYR02966	EGG19111, EGG19112, EGG20258, EGG23979, EGG24827, EGG25119	EFA74908, EFA78780, EFA78781, EFA82997
OG0000247	EAL67201, EAL67865	EGC31691, EGC34202, EGC37343	KYQ93076, KYQ93077, KYR00180	EGG15400, EGG15422, EGG19197	EFA75182, EFA77520, EFA80703
OG0000248	EAL64888, EAL66868, EAL66870, EAL66871	EGC31606, EGC37141, EGC37145, EGC39008, EGC39415, EGC39416, EGC39436		EGG19543, EGG22311	EFA82507
OG0000249	EAL66021	EGC30137, EGC34835, EGC36086, EGC36541, EGC37134	KYQ89521, KYQ89857, KYQ91870, KYQ94116, KYQ94165		EFA74680, EFA81391, EFA84020
OG0000250	EAL64187	EGC32454		EGG13342, EGG15600, EGG17736, EGG18944, EGG18945, EGG19515, EGG19767, EGG20131, EGG21471, EGG23032, EGG25045	EFA76442
OG0000251			KYQ88265, KYQ89591, KYQ92691, KYQ92731, KYQ92983, KYQ94033, KYQ99926, KYQ99927, KYR02953, KYR02989	EGG20978, EGG24875	EFA75644, EFA77565
OG0000252				EGG13632, EGG13633, EGG13637, EGG13649, EGG13716, EGG18336, EGG19235	EFA74700, EFA75142, EFA75143, EFA77451, EFA77540, EFA77543, EFA85564
OG0000253		EGC29678, EGC29684, EGC33403, EGC33405, EGC35842, EGC35853, EGC36222, EGC36238, EGC36539, EGC36554, EGC36559, EGC36980, EGC36982		EGG13779
OG0000254			KYQ88542, KYQ88651, KYQ88656, KYQ89647, KYQ91923, KYQ92705, KYQ93584, KYQ99672, KYQ99978, KYR00439, KYR02149	EGG16129, EGG23084	EFA76106
OG0000255			KYQ88506, KYQ89904, KYQ89906, KYQ89911, KYQ89913, KYQ89916, KYQ93732, KYQ99994, KYQ99995, KYR00013, KYR00015, KYR01161, KYR01900, KYR03032
OG0000256		EGC28223, EGC29070, EGC31565, EGC31831, EGC32171, EGC33693, EGC34064, EGC34193, EGC34810, EGC35377, EGC37389, EGC37450, EGC40440	KYQ88901
OG0000257		EGC28225, EGC29485, EGC31328, EGC31337, EGC31417, EGC31668, EGC31917, EGC32578, EGC34192, EGC36162, EGC38712, EGC39797, EGC40228			EFA81748
OG0000258		EGC30692, EGC31902, EGC33081, EGC34055, EGC34819, EGC34827, EGC35610, EGC36252, EGC36448, EGC37394, EGC38784, EGC40135			EFA79730, EFA80487
OG0000259	EAL63437	EGC30502, EGC30667, EGC30668, EGC31711, EGC32323, EGC34598, EGC34934, EGC37323, EGC37472, EGC37473	KYQ91394		EFA83221
OG0000260	EAL63234, EAL72953, EAL72958	EGC28280, EGC28281, EGC28282, EGC30486, EGC30835, EGC32338, EGC37319, EGC38090, EGC38091, EGC38788
OG0000261	EAL62142, EAL62454, EAL62507, EAL62508, EAL62788, EAL68152, EAL71273, EAL73186	EGC37172	KYR01809	EGG20991, EGG20993	EFA80573
OG0000262	EAL62438, EAL62511, EAL62613	EGC29063, EGC29474, EGC30339, EGC30908, EGC36295, EGC36653, EGC37814, EGC39497, EGC40523, EGC40588
OG0000263	EAL61118, EAL62366, EAL70386, EAL70478, EAL71034	EGC35486	KYQ89044, KYR02180	EGG17857, EGG18049	EFA82438, EFA85207, EFA86170
OG0000264	EAL70490, EAL70679, EAL70743, EAL70790, EAL73114	EGC40331, EGC40382, EGC40383	KYQ90407, KYQ92186	EGG18986	EFA85723, EFA85724
OG0000265	EAL64481, EAL68039, EAL71913, EAL72275, EAL72383, EAL72712, EAL72862	EGC37229	KYQ92338	EGG16633, EGG16653	EFA85861, EFA85869
OG0000266	EAL70628, EAL70805, EAL71974	EGC36419, EGC39437	KYR00416	EGG19117, EGG20940, EGG21629, EGG21655	EFA75031, EFA76158, EFA76159
OG0000267	EAL61196				EFA74667, EFA74668, EFA74944, EFA75632, EFA75819, EFA76434, EFA77056, EFA77506, EFA77507, EFA78111, EFA81388, EFA81389
OG0000268	EAL60879, EAL64229, EAL71823	EGC31561, EGC32010, EGC33016, EGC35829, EGC36402, EGC36878, EGC40314, EGC40326	KYR02030	EGG17443
OG0000269	EAL60719, EAL60850	EGC31735, EGC35221, EGC38794	KYQ93088, KYQ94050	EGG20423	EFA74806, EFA79682, EFA81216, EFA82361, EFA86540
OG0000270	EAL60918, EAL65138, EAL66099	EGC31342, EGC33431, EGC39317	KYQ96684, KYQ99651, KYR00725	EGG20562, EGG21657	EFA78995, EFA79109
OG0000271	EAL60338	EGC29738, EGC29879, EGC32162, EGC32550, EGC33739, EGC34817, EGC34993, EGC36332, EGC36424, EGC37186	KYQ93913, KYR01186
OG0000272	EAL64531, EAL71369, EDR41055	EGC34621	KYQ91781	EGG14469, EGG18125, EGG18126, EGG19289, EGG19290	EFA79619, EFA84205, EFA86218
OG0000273	EAL69761	EGC28503, EGC28820, EGC32197, EGC32200, EGC32619, EGC32676, EGC33529, EGC36040, EGC36437, EGC38688		EGG25379	EFA80871
OG0000274	EAL68499, EAS66899	EGC28973, EGC31045, EGC33541, EGC39652, EGC39653, EGC39654	KYQ91114	EGG16715, EGG16955	EFA77646, EFA80357
OG0000275	EAL67236	EGC30003, EGC30206, EGC30768, EGC34154	KYR00291	EGG17322, EGG17323	EFA77841, EFA77842, EFA77843, EFA77845, EFA84879
OG0000276	EAL66844, EAL66947, EAL66948, EAL67050, EAL67051, EAL67052, EAL67053, EAL67062, EAL67063	EGC29529, EGC38409, EGC38902, EGC39548
OG0000277	EAL65670, EAL65813, EAL66063	EGC29290, EGC31959, EGC35101	KYQ93379, KYR01654	EGG15234, EGG16683, EGG19402	EFA79148, EFA82817
OG0000278	EAL64059, EAS66849	EGC30173, EGC32086	KYQ90311, KYQ90724, KYQ96933	EGG14614, EGG20358, EGG24560	EFA74506, EFA74714, EFA84801
OG0000279				EGG13787, EGG15636, EGG15650, EGG22593, EGG24865	EFA79239, EFA81390, EFA81401, EFA81403, EFA81405, EFA81407, EFA85529, EFA85554
OG0000280				EGG14287, EGG14570, EGG18716, EGG22000, EGG23771, EGG24090, EGG24093, EGG24094, EGG25044, EGG25210	EFA75694, EFA80980, EFA86767
OG0000281				EGG14638, EGG16549, EGG18141, EGG18142, EGG20342, EGG21303, EGG22167, EGG22183, EGG22192, EGG22274, EGG24184, EGG25065	EFA78726
OG0000282			KYQ88277, KYQ88278, KYQ89663, KYQ89758, KYQ89759, KYQ89760, KYQ91997, KYQ93145, KYQ93564, KYR00140	EGG17497	EFA74791, EFA82839
OG0000283		EGC33834, EGC38901	KYQ91543, KYQ92488, KYQ92539, KYQ92540, KYQ92541, KYQ92542, KYQ92543, KYQ92544, KYQ92545, KYQ92551	EGG18208
OG0000284			KYQ90288, KYQ93576, KYQ99869, KYQ99870, KYQ99871, KYQ99872, KYQ99873, KYR00922, KYR01528, KYR01529, KYR01532, KYR01533, KYR01981
OG0000285			KYQ88367, KYQ88368, KYQ88369, KYQ89560, KYQ89561, KYQ89735, KYQ89739, KYQ89862, KYQ90495, KYQ94102, KYQ94129, KYQ94132, KYR01973
OG0000286					EFA80385, EFA80456, EFA80458, EFA81787, EFA83744, EFA84540, EFA84562, EFA84563, EFA84635, EFA84694, EFA84709, EFA84722, EFA86536
OG0000287	EAL70694, EAL70727, EAL73706	EGC28508, EGC32902	KYQ88797, KYQ90205	EGG14778, EGG17730	EFA76891, EFA77116, EFA78581
OG0000288	EAL63014, EAL70071, EAL70072, EAL72455	EGC28880, EGC31306, EGC37264, EGC40082	KYR01905	EGG20079	EFA75623, EFA83567
OG0000289	EAL63810, EAL65745, EAL69700	EGC30971, EGC38032	KYQ88520, KYQ88682, KYR03130	EGG17339, EGG25038	EFA76357, EFA84405
OG0000290	EAL63698	EGC35124, EGC38717	KYQ91060	EGG13412, EGG18429	EFA78880, EFA78881, EFA78885, EFA78887, EFA78893, EFA81350
OG0000291	EAL63705, EAS66818	EGC37025, EGC37876, EGC37879		EGG16592, EGG18638, EGG24864	EFA84344, EFA84345, EFA84347, EFA84350
OG0000292	EAL63492, EAL64035, EAL66783	EGC34852, EGC38375	KYQ89859	EGG21172, EGG24152, EGG24262	EFA76770, EFA79345, EFA85067
OG0000293	EAL63435	EGC39171	KYQ89053, KYQ90025, KYQ90026, KYQ90027, KYQ90028, KYR01772, KYR02873	EGG21693	EFA84629, EFA85053
OG0000294	EAL63445	EGC32462	KYQ89851	EGG15859, EGG20148	EFA75594, EFA81398, EFA84810, EFA86635, EFA86640, EFA86656, EFA86657
OG0000295	EAL62972	EGC28884, EGC29876, EGC29968, EGC33799, EGC39742	KYQ89083, KYQ89553, KYR00894	EGG14183	EFA75820, EFA83658
OG0000296	EAL61884, EAL62941, EAL68154, EAL68155	EGC28363, EGC32720, EGC35770	KYQ94317	EGG21481, EGG22730	EFA76561, EFA80416
OG0000297	EAL62468, EAL64371, EAL69250, EAL71069, EAL71296	EGC28577, EGC38575	KYQ91881, KYQ96792	EGG17936	EFA78050, EFA79070
OG0000298	EAL62389, EAL69614, EAL71664	EGC30663, EGC31054, EGC31702, EGC34035, EGC38003, EGC38347, EGC38835, EGC39030, EGC39031
OG0000299	EAL62209, EAL64170, EAL67449, EAL68762, EAL70616, EAL70774, EAL71176	EGC31050, EGC31251, EGC36527	KYQ90242, KYR01547
OG0000300	EAL62007, EAL62008, EAL72068, EAL72609, EAL73316, EAL73317, EAL73619, EAL73753	EGC28706, EGC37831	KYQ93605, KYQ93606
OG0000301	EAL61943, EAL65227, EAL68404	EGC33931, EGC37904	KYQ92515, KYR00762	EGG18053, EGG18066, EGG18111	EFA74623, EFA74648
OG0000302	EAL73349	EGC34103		EGG16020, EGG17202, EGG19193, EGG19809, EGG20909, EGG23073	EFA74629, EFA77159, EFA77160, EFA83068
OG0000303	EAL61008, EAL65244, EAL65245, EAL65246, EAL72966	EGC30650, EGC32765, EGC35642, EGC38588	KYQ90097	EGG17772	EFA82442
OG0000304	EAL72015	EGC30291, EGC32449, EGC35015, EGC38448		EGG19325, EGG19632, EGG20218, EGG20769, EGG21979, EGG21982, EGG24266
OG0000305	EAL66421, EAL72102, EAL72103, EAL72104, EAL72115, EAL72117, EAL72118, EAL72119, EAL72120, EAL72388, EAL72389		KYQ93349
OG0000306	EAL61820, EAL70415, EAL70918, EAL70935, EAL71015, EAL71054, EAL71719, EAL71728, EAL71790, EAL71793			EGG15567, EGG21314
OG0000307	EAL61370, EAL64446, EAL64449	EGC38522, EGC39827	KYQ90195	EGG14074, EGG14768, EGG21832, EGG24000	EFA84707, EFA86791
OG0000308	EAL60608, EAL60609, EAL60669, EAL60671	EGC40230	KYQ93390, KYR01522	EGG16406	EFA82713, EFA82714, EFA82715, EFA84036
OG0000309	EAL60631, EAL69538	EGC34781, EGC37070, EGC37072	KYQ92102, KYQ92103	EGG14269, EGG14270, EGG14271, EGG16537	EFA85332
OG0000310	EAL69634, EAL71607	EGC38078	KYQ96906, KYQ96907, KYQ96908, KYQ96909, KYR01740, KYR01742, KYR01743, KYR01744, KYR01794
OG0000311	EAL67010, EAL71022	EGC29495	KYQ90086	EGG15625, EGG16462, EGG18275, EGG18284, EGG23512	EFA78370, EFA78371, EFA86774
OG0000312	EAL70425, EAL71084	EGC33292	KYQ89363	EGG13559	EFA75001, EFA76817, EFA76904, EFA78754, EFA78871, EFA78873, EFA84647
OG0000313	EAL68169, EAL70419, EAL70420, EAL70934, EAL71085	EGC34270	KYQ88268, KYQ88517, KYQ88580, KYR00004, KYR01379		EFA77535
OG0000314	EAL70404, EAL70405, EAL70406, EAL70939, EAL71160, EAS66862, EAS66922	EGC28757, EGC31512, EGC32176, EGC35569, EGC39648
OG0000315	EAL69983	EGC32614, EGC34142	KYQ91476, KYR00374, KYR03124	EGG18852, EGG20328, EGG24519, EGG24520, EGG24960	EFA75204
OG0000316	EAL68905, EAL69029, EAL69401, EAL69736	EGC35905	KYQ88703, KYQ92370, KYQ92461, KYQ92462, KYQ92463	EGG19373	EFA79287
OG0000317	EAL66016, EAL67244, EAL69066	EGC30079, EGC39380	KYQ88592, KYQ94009, KYR00599	EGG13511, EGG15368	EFA80084, EFA80777
OG0000318	EAL64547, EAL64615, EAL65872, EAL68986	EGC32385, EGC34124, EGC34125, EGC36528, EGC36530, EGC38917		EGG20142	EFA76380
OG0000319	EEU04115	EGC30636	KYQ91108	EGG13313, EGG13314, EGG13315, EGG13918, EGG14645, EGG15741, EGG18380, EGG22356	EFA82841
OG0000320	EAL65510, EAL67034	EGC29170, EGC40106	KYQ92832, KYQ93208, KYR01227	EGG14703, EGG21743	EFA78671, EFA78941, EFA86671
OG0000321	EAL67777	EGC28249, EGC28295, EGC33404, EGC35832, EGC36228, EGC36284, EGC36542, EGC36981	KYR01735	EGG17724	EFA85057
OG0000322	EAS66879	EGC31608	KYQ88411, KYQ88995, KYQ89449, KYQ89546, KYQ90306, KYQ92563, KYQ99730, KYR01093, KYR01175, KYR03013
OG0000323	EAL66511	EGC30515, EGC40251	KYQ93759, KYQ99756	EGG16616, EGG23300	EFA74849, EFA80569, EFA81127, EFA83188, EFA83189
OG0000324			KYQ88654, KYQ88911	EGG14410, EGG14414, EGG15789, EGG16936, EGG18093, EGG18184, EGG18912, EGG19246, EGG19768, EGG20060
OG0000325		EGC34830, EGC37269, EGC38436	KYR01192	EGG14493, EGG16228, EGG17897, EGG18149, EGG18502, EGG19916, EGG20264, EGG22811
OG0000326			KYQ93212, KYQ93268, KYR02564	EGG22771	EFA77255, EFA77256, EFA78436, EFA80419, EFA80821, EFA80822, EFA83116, EFA83124
OG0000327			KYQ88290, KYQ89670, KYQ93578, KYQ96834, KYQ96890, KYQ96891, KYR00222, KYR00673, KYR02267, KYR02995, KYR03017		EFA86130
OG0000328					EFA78966, EFA78976, EFA78982, EFA79007, EFA79009, EFA79014, EFA79018, EFA79020, EFA79027, EFA80611, EFA80613, EFA80910
OG0000329	EAL60364, EAL60694, EAL63846, EAL63862, EAL73005, EEU04055	EGC30082, EGC30084, EGC38490, EGC38492, EGC38493
OG0000330	EAL63815, EAS66808, EAS66847	EGC32833, EGC33864, EGC37579, EGC39384	KYQ89998	EGG21841, EGG23885	EFA82952
OG0000331	EAL60820, EAL63704, EAL64549, EAL64648, EAL64651, EAL64653, EAL64702, EAL64723, EAL64724, EAL64725	EGC35800
OG0000332	EAL60913, EAL63543	EGC30869, EGC30870, EGC30871, EGC30872	KYR00885, KYR02303	EGG24204, EGG24206	EFA80226
OG0000333	EAL63549, EAL63550	EGC33302, EGC33303	KYQ88250, KYQ89738, KYQ90411, KYQ93547	EGG15445, EGG20523	EFA79025
OG0000334	EAL63308, EAL63312, EAL63316, EAL70036, EAL72114, EAL72715	EGC33616, EGC33634	KYQ88404	EGG23902	EFA85626
OG0000335	EAL63187, EAL63188, EAL63200	EGC28749, EGC35538, EGC39837	KYQ89981, KYR00435	EGG17658	EFA77208, EFA77209
OG0000336	EAL63086, EAL63087	EGC38804	KYQ89689, KYQ93376, KYQ93377, KYR01688	EGG15284, EGG20182, EGG20187	EFA76232
OG0000337	EAL62966, EAL67729, EAL71792, EAL71813, EAL71814	EGC30062, EGC30063	KYQ89781, KYQ92301, KYQ93041	EGG20804
OG0000338	EAL62814, EAL62836, EAL62837, EAL69070	EGC29812, EGC29813	KYQ90258	EGG16512, EGG21914	EFA78155, EFA78491
OG0000339	EAL62040, EAL62845, EAL62846, EAL72590, EEU04144, EEU04149, EEU04151	EGC33837, EGC34712, EGC35001, EGC36457
OG0000340	EAL62817	EGC36800	KYQ89813, KYR01958, KYR02212	EGG17352, EGG19850	EFA75385, EFA76466, EFA76470, EFA76471
OG0000341	EAL62466, EAL73109	EGC31914, EGC39678	KYQ94148, KYR00490, KYR00492, KYR02378, KYR02380	EGG20787, EGG21098
OG0000342	EAL62226	EGC34761	KYR00279	EGG16817, EGG20312, EGG23575	EFA75095, EFA78914, EFA82040, EFA86226, EFA86371
OG0000343	EAL61153, EAL62229, EAL66518, EAL73269	EGC30177, EGC32779, EGC37535, EGC40255	KYR02961	EGG16966	EFA79118
OG0000344	EAL62172, EAL69129, EDR41096	EGC32915, EGC37574	KYQ89103, KYQ90806	EGG18278, EGG24069	EFA77153, EFA80044
OG0000345	EAL61895	EGC32068, EGC32821	KYQ94314	EGG21492, EGG23780, EGG25358	EFA76687, EFA77405, EFA81767, EFA85014
OG0000346	EAL64605, EAL66681, EAL72138, EAL73265	EGC30796, EGC30797, EGC38261	KYQ94176	EGG25001	EFA74576, EFA85653
OG0000347	EAL67120, EAL73394, EAL73398, EAL73404	EGC28610, EGC29146, EGC33515	KYQ91056, KYR02431	EGG23759, EGG23760
OG0000348	EAL60538, EAL64303, EAL65051, EAL73007	EGC29818, EGC30004, EGC30602, EGC40173, EGC40256	KYQ92560, KYR01121
OG0000349	EAL71330, EAL71435, EAL71932, EAL72268	EGC34129, EGC34138, EGC34357	KYQ93467	EGG20467	EFA79729, EFA85728
OG0000350	EAL72733	EGC28769	KYQ93327	EGG14157, EGG15151, EGG20711, EGG21417, EGG21419	EFA80415, EFA86153, EFA86169
OG0000351	EAL61771, EAL69086, EAL71929	EGC30415, EGC34908	KYR01019	EGG21969, EGG22062	EFA84746, EFA85411, EFA86173
OG0000352	EAL61595, EAL65045	EGC30803, EGC34317	KYQ90819, KYQ99739	EGG15410, EGG24563	EFA77618, EFA77619, EFA77625
OG0000353	EAL61518, EAL68623	EGC30219, EGC36737	KYQ90162, KYQ93744, KYR03037	EGG15112, EGG19875	EFA76758, EFA86762
OG0000354	EAL61480, EAL69847, EAL69964	EGC33003, EGC33989, EGC37529	KYR00613	EGG20926	EFA74771, EFA82401, EFA85964
OG0000355	EAL61132, EAL68954, EAL68955, EAL69013	EGC31120, EGC31121, EGC39071, EGC39072, EGC39073	KYQ91607, KYQ91617
OG0000356	EAL61077, EAL64023	EGC29125, EGC29424, EGC30556, EGC30957, EGC33401, EGC33530, EGC40199, EGC40200, EGC40205
OG0000357	EAL63837, EAL64269, EAL71701	EGC29227, EGC36212	KYQ96924	EGG17083	EFA77849, EFA77850, EFA83340, EFA83938
OG0000358	EAL71573, EAL71574			EGG20222, EGG21867, EGG22860, EGG22861	EFA74530, EFA74531, EFA75015, EFA76001, EFA86817
OG0000359	EAL66333, EAL66365, EAL71373, EAL71449, EAL71481	EGC30077, EGC35510, EGC35511		EGG24813	EFA78536, EFA86783
OG0000360	EAL65134, EAL65147, EAL70450, EAL71155	EGC31044, EGC34513	KYQ90765, KYQ96900, KYR02616	EGG18728, EGG22903
OG0000361	EAL66811, EAL70448, EAL71156	EGC29178, EGC31763	KYQ91242, KYQ93183	EGG14003, EGG21582	EFA78401, EFA83475
OG0000362	EAL70626, EAL70627, EAL70793, EAL70806	EGC30461, EGC30462	KYQ92819, KYQ92820	EGG25294, EGG25295	EFA85985
OG0000363	EAL70296, EAL70558, EAL70815	EGC38061	KYQ91196, KYQ99985	EGG23859	EFA82707, EFA82708, EFA82709, EFA82710
OG0000364	EAL70063, EAL70140	EGC28926, EGC30184	KYR01403, KYR02173, KYR02174, KYR02175, KYR02878	EGG23459	EFA79389
OG0000365	EAL65152, EAL66094, EAL70263	EGC28356, EGC35495	KYQ88174, KYQ89627	EGG13592, EGG17693	EFA82247, EFA86299
OG0000366	EAL67380, EAL68895	EGC29616, EGC30566, EGC35476	KYQ91917, KYQ93899	EGG17819, EGG18547	EFA76853, EFA83792
OG0000367	EAL68654	EGC32728	KYQ88258, KYR01034	EGG14807, EGG20741, EGG21853	EFA78692, EFA82341, EFA84112, EFA86531
OG0000368	EAL68127	EGC34277	KYQ93688	EGG13518, EGG14488, EGG16161, EGG19487, EGG22002, EGG24225, EGG25265	EFA77338
OG0000369	EAL68214	EGC29595, EGC30406, EGC34188, EGC34189, EGC34190, EGC34191, EGC34859, EGC35369, EGC38117, EGC38550
OG0000370	EAL64081, EAL66356	EGC31436, EGC37688, EGC37706, EGC39303	KYQ89751	EGG23233	EFA75967, EFA82670, EFA85209
OG0000371	EAL65178, EAL65179, EAL65202, EAL65784	EGC31093, EGC31108	KYR00801, KYR00802, KYR00807, KYR00808	EGG21579
OG0000372	EAL65508, EAL65541	EGC28810, EGC29555, EGC32699, EGC32731, EGC32732, EGC32738, EGC33345, EGC33346, EGC39828
OG0000373	EAL64553	EGC28476, EGC30746, EGC30748, EGC30749, EGC33650, EGC33928, EGC35217, EGC37037	KYQ99666	EGG20072
OG0000374				EGG15902, EGG16213, EGG16252, EGG16397, EGG16837, EGG18037, EGG20715, EGG23455, EGG24044, EGG24388, EGG25311
OG0000375				EGG21333, EGG24412	EFA74554, EFA74555, EFA74556, EFA74558, EFA74559, EFA74561, EFA75835, EFA80745, EFA85814
OG0000376			KYQ99778	EGG14830, EGG17777, EGG19053, EGG19227, EGG19814, EGG19815, EGG19816, EGG19817	EFA75020, EFA76074
OG0000377			KYR02105	EGG16255, EGG19857	EFA74661, EFA74662, EFA76005, EFA76625, EFA77883, EFA80610, EFA82224, EFA86126
OG0000378			KYQ93056, KYQ93401, KYR01255	EGG18385, EGG18388, EGG22451, EGG23572	EFA86240, EFA86243, EFA86649, EFA86807
OG0000379				EGG23009	EFA75858, EFA75998, EFA76003, EFA76062, EFA76065, EFA76068, EFA77760, EFA80217, EFA83843, EFA85729
OG0000380	EAL60297	EGC36333, EGC37390		EGG17009, EGG17221, EGG19223	EFA75345, EFA80216, EFA85708, EFA86050
OG0000381	EAL63817	EGC35047	KYQ88699, KYQ89369, KYQ91545, KYQ91603, KYR02083	EGG15657	EFA76619, EFA79433
OG0000382	EAL63490, EAL63600, EAL63674, EAL63714, EAL68173	EGC29608, EGC29609, EGC34302, EGC36684, EGC36685
OG0000383	EAL61032, EAL63602, EAL65987, EAL66228, EAL67629, EEU04042	EGC35330, EGC38439			EFA74977, EFA78098
OG0000384	EAL63459, EAL67579, EAL72963, EAL72995	EGC29338, EGC29772, EGC30687, EGC31775	KYR01723		EFA78467
OG0000385	EAL63390, EAL64963	EGC36259	KYR01401, KYR03082, KYR03083	EGG13463, EGG19293	EFA78601, EFA82166
OG0000386	EAL61852, EAL63359, EAL70168	EGC34303, EGC34670, EGC35963, EGC40073	KYQ88611	EGG24550	EFA82099
OG0000387	EAL63320, EAL68087, EAL68088, EAL70653, EAL70721	EGC31161	KYQ99906	EGG19622, EGG21523	EFA84701
OG0000388	EAL63248, EAL65165, EAL71712, EAL71714, EAL71718, EAL71791, EAL71837	EGC31527, EGC31768, EGC32170
OG0000389	EAL61903, EAL63157, EAL71488	EGC31080, EGC35501	KYQ88355	EGG16154, EGG20008	EFA82199, EFA82659
OG0000390	EAL62859, EEU04077	EGC37681	KYR02861	EGG20768, EGG21981, EGG23326	EFA86398, EFA86399, EFA86400
OG0000391	EAL62764	EGC28997	KYQ91789	EGG15818, EGG15819, EGG16445, EGG25149	EFA75790, EFA75791, EFA81741
OG0000392	EAL62718, EAL66023	EGC29251, EGC31632	KYQ89232, KYQ93214	EGG17789	EFA77878, EFA78574, EFA86777
OG0000393	EAL62674, EAL67802	EGC35741		EGG23531, EGG23532, EGG23533	EFA78749, EFA82573, EFA82673, EFA84974
OG0000394	EAL62592, EAL72610	EGC31412, EGC39011	KYQ88226, KYQ88227, KYR00074	EGG13542	EFA75639, EFA81438
OG0000395	EAL61901	EGC32090	KYQ88677, KYQ91077, KYQ91078	EGG14815, EGG14890, EGG19295, EGG19660	EFA79174
OG0000396	EAL67669, EAL73180	EGC29559, EGC30715, EGC38430	KYQ90939, KYQ92706	EGG25134	EFA83629, EFA85556
OG0000397	EAL60646, EAL60647, EAL73621	EGC34472, EGC40457	KYQ90295, KYQ92535	EGG16062, EGG16188	EFA84829
OG0000398	EAL60705, EAL60763, EAL64981, EAL66707, EAL66708, EAL70631, EAL70880, EAL72794, EAL73342, EAL73744
OG0000399	EAL73402	EGC34457	KYQ93539	EGG15840, EGG25057	EFA74935, EFA75468, EFA76706, EFA77833, EFA84732
OG0000400	EAL65366, EAL69986, EAL73745	EGC28531, EGC29268	KYQ92285	EGG18059, EGG19277	EFA76102, EFA76388
OG0000401	EAL67963, EAL72622, EAL72625, EAL72683, EAS66889	EGC37210, EGC37230	KYQ92337	EGG16648	EFA85865
OG0000402	EAL68083, EAS66936	EGC34868	KYQ88552, KYQ94159, KYR03161	EGG19518, EGG21053	EFA75081, EFA78167
OG0000403	EAL69925, EAL72239	EGC31400, EGC36066	KYQ91992, KYR00904	EGG14957, EGG16916	EFA83634, EFA84133
OG0000404	EAL68107, EAL71939	EGC30410, EGC33713, EGC38963	KYQ92547, KYR01421	EGG14853	EFA78383, EFA85903
OG0000405	EAL71904, EAL72286, EAL72691, EAL72843	EGC31974, EGC35440, EGC38634, EGC38933	KYQ90044	EGG19592
OG0000406	EAL70502, EAL70842, EAL71922	EGC31973	KYR00848, KYR02032	EGG13827, EGG23634	EFA83410, EFA86375
OG0000407	EAL61386, EAL64816, EAL67477, EAL72746	EGC28252, EGC31359, EGC31843, EGC33699, EGC34839, EGC37417
OG0000408	EAL61732	EGC30110	KYQ88839, KYQ89121, KYQ89410, KYQ89413, KYQ92792	EGG13579, EGG15958	EFA78621
OG0000409	EAL61757, EAL61823, EAL70346, EAL70530, EAL70833	EGC34738, EGC36246, EGC36247			EFA75722, EFA75734
OG0000410	EAL61785, EAL64728	EGC34315, EGC39634	KYQ99737	EGG19458	EFA78764, EFA84940, EFA84941, EFA84944
OG0000411	EAL61401, EAL61404, EAL68864	EGC33374, EGC37243	KYQ91290, KYR00317	EGG20391, EGG22250	EFA74740
OG0000412	EAL61327, EDR41085	EGC30838, EGC37368	KYQ90843, KYQ93880	EGG17302, EGG21093	EFA83293, EFA85126
OG0000413	EAL61091, EAL61154, EAL64779, EAL71583	EGC32887, EGC38484	KYQ91391, KYR02707	EGG22898	EFA77980
OG0000414	EAL61065, EAL66543	EGC28386, EGC29088	KYQ93082, KYQ99764	EGG21845, EGG24496	EFA75243, EFA75637
OG0000415	EAL60926, EAL60943, EAL60945	EGC38775, EGC38776, EGC38797	KYR00179	EGG20756, EGG23173	EFA86537
OG0000416	EAL66367, EAL71227, EAL71532, EAL71533	EGC35128, EGC35497, EGC35498		EGG24814	EFA81733, EFA83418
OG0000417	EAL71437	EGC28570	KYR01673	EGG18436, EGG18439, EGG18440, EGG18441, EGG18442, EGG18443	EFA80397
OG0000418	EAL71256, EAL71257	EGC33336, EGC39127	KYQ89583, KYQ93406	EGG14914, EGG21379	EFA80260, EFA85228
OG0000419	EAL70302, EAL71136	EGC29891, EGC39673	KYQ91901, KYQ92152	EGG18714, EGG20252	EFA77713, EFA85923
OG0000420	EAL69396, EAL70621, EAL70776	EGC30465, EGC31496	KYQ91245, KYQ91871	EGG14210	EFA76850, EFA84658
OG0000421	EAL68786, EAL70608, EAL70769	EGC34905, EGC38434	KYQ89019, KYQ90560	EGG22673, EGG23278	EFA82167
OG0000422	EAL67969, EAL68013, EAL70097	EGC36669, EGC39544	KYQ92240, KYR00558	EGG18988	EFA85849, EFA85850
OG0000423	EAL69088, EAL70088	EGC29909, EGC34344	KYQ88455	EGG13477	EFA80507, EFA85298, EFA86148, EFA86643
OG0000424	EAL69690	EGC30210, EGC33705, EGC39049, EGC39670, EGC39691, EGC39697, EGC39698, EGC39699, EGC40387
OG0000425	EAL66498, EAL69606	EGC29218, EGC32682	KYQ93658, KYR02930	EGG13895, EGG24018	EFA76990, EFA79428
OG0000426	EAL67978, EAL69041	EGC30156, EGC39849	KYQ93463, KYR00718	EGG13505, EGG14588, EGG14758	EFA85340
OG0000427	EAL68777, EAL68933	EGC39086, EGC39282	KYQ90801, KYQ90802	EGG25166	EFA79069, EFA85533, EFA86709
OG0000428	EAL66224, EAL68596	EGC29860, EGC29943	KYQ96694, KYR01154	EGG16614, EGG17991	EFA76406, EFA77220
OG0000429	EAL68461	EGC35885	KYQ88194	EGG15231, EGG16713, EGG18051, EGG18052, EGG18056, EGG18057, EGG21031
OG0000430	EAL66497, EAL67509	EGC39618, EGC40298	KYR00826, KYR02002	EGG17971, EGG17972	EFA83951, EFA86553
OG0000431	EAL66911	EGC30954	KYQ91851, KYQ92952, KYR00917	EGG19832, EGG24188, EGG24190	EFA82704, EFA83935
OG0000432	EAL66248		KYQ88245, KYQ90064	EGG13607, EGG18664, EGG20965, EGG24382, EGG25182	EFA77445, EFA86160
OG0000433	EAL64914, EAL64984, EAL65823, EAL65838	EGC29083, EGC32953, EGC32954	KYQ92634	EGG22675	EFA79628
OG0000434	EAL65591	EGC29635	KYQ93364	EGG15518, EGG15526, EGG18506, EGG23209	EFA80520, EFA86752, EFA86754
OG0000435	EAL65056	EGC30832	KYQ90922, KYR02244, KYR03154	EGG15713, EGG16164, EGG22178, EGG22197	EFA85158
OG0000436	EAL64205	EGC29203	KYQ90225, KYQ92450	EGG21345	EFA81062, EFA81178, EFA83332, EFA86603, EFA86604
OG0000437	EAL64232, EAL64252	EGC31888, EGC32745, EGC38392	KYQ89442, KYR02085, KYR02086	EGG22534	EFA80599
OG0000438	EAL64105	EGC29565, EGC33908	KYR01111	EGG17476, EGG19184, EGG20395, EGG20437, EGG23385	EFA77320
OG0000439			KYQ89426	EGG14292, EGG15313, EGG16027, EGG18777, EGG21305, EGG21555, EGG21574	EFA76554, EFA84183
OG0000440				EGG15385, EGG23874	EFA75277, EFA76087, EFA76091, EFA83608, EFA84438, EFA84507, EFA84509, EFA86426
OG0000441			KYQ91190, KYR02761	EGG13669, EGG17503, EGG18591, EGG23730, EGG24126	EFA78776, EFA80756, EFA84660
OG0000442				EGG14586, EGG16404, EGG16838, EGG16839, EGG18914, EGG19915, EGG25280	EFA75530, EFA75531, EFA80329
OG0000443			KYQ91343	EGG14527, EGG17640, EGG19911, EGG20040, EGG20041, EGG20776	EFA80371, EFA81570, EFA85371
OG0000444				EGG18555, EGG18582, EGG18635, EGG18691, EGG18692, EGG18706	EFA80563, EFA84688, EFA84716, EFA85939
OG0000445				EGG19531, EGG19532, EGG19533, EGG19534, EGG19536, EGG19537, EGG19578	EFA75390, EFA84284, EFA84884
OG0000446			KYQ89563, KYQ91950, KYQ92321, KYQ93501, KYR01367, KYR01368, KYR01388, KYR01604, KYR01605, KYR02653
OG0000447			KYQ92470, KYQ92472, KYQ92718		EFA79024, EFA80320, EFA80324, EFA80326, EFA80345, EFA82046, EFA82073
OG0000448			KYQ88899		EFA75372, EFA76798, EFA77430, EFA77902, EFA79505, EFA82593, EFA83394, EFA83489, EFA85612
OG0000449					EFA76988, EFA77585, EFA81502, EFA83762, EFA84006, EFA84237, EFA84239, EFA84335, EFA84383, EFA84384
OG0000450	EAL60381, EAL62642, EAL73042, EAL73413, EAL73844	EGC30837, EGC33695, EGC35985, EGC40292
OG0000451	EAL63528, EAL63595	EGC35701, EGC36063	KYQ90406, KYR02376	EGG22712	EFA86682, EFA86683
OG0000452	EAL63493, EAL63851	EGC30098, EGC33777	KYQ93484	EGG13793, EGG14906	EFA82218, EFA86200
OG0000453	EAL63491, EAL66504	EGC30863, EGC40252	KYR01000, KYR02696	EGG18254	EFA79340, EFA86605
OG0000454	EAL62995, EAL63412			EGG22301, EGG23653	EFA75032, EFA86388, EFA86389, EFA86397, EFA86523
OG0000455	EAL63264, EAL69876, EAL69927, EAL71436	EGC28571, EGC40099	KYR01672	EGG18204	EFA80398
OG0000456	EAL63194, EAL64909	EGC30094, EGC36313	KYQ94054, KYQ96749	EGG19700	EFA74865, EFA79139
OG0000457	EAL62879	EGC36804	KYQ89842	EGG13510, EGG19830, EGG22288	EFA82717, EFA82718, EFA82719
OG0000458	EAL62880, EAL64439	EGC33034, EGC33941, EGC36794	KYR01930	EGG16731, EGG21524	EFA76468
OG0000459	EAL60521, EAL62654, EAL67687, EAL69499, EAL70037, EAL73011, EAL73012		KYQ93725		EFA80742
OG0000460	EAL62573	EGC34463		EGG17171, EGG20420	EFA75105, EFA76769, EFA79768, EFA80433, EFA80434
OG0000461	EAL62580	EGC34475	KYQ91076, KYQ96645	EGG18466	EFA75743, EFA80740, EFA81515, EFA83715
OG0000462	EAL62599	EGC30349, EGC32329	KYQ90265, KYQ93989, KYQ93990	EGG20542	EFA81330, EFA81982
OG0000463	EAL62419, EAL70112	EGC35827, EGC40031	KYQ89586	EGG13805, EGG19369	EFA79853, EFA84047
OG0000464	EAL62077, EAL62088, EAS66829, EAS66900	EGC29920, EGC33285, EGC33286, EGC33287, EGC38179
OG0000465	EAL62134, EAL66476	EGC36615	KYR00402, KYR03114	EGG21508, EGG25375	EFA79587, EFA84073
OG0000466	EAL62096, EAL69997	EGC29008	KYQ90629	EGG13330, EGG20172	EFA81747, EFA81749, EFA81869
OG0000467	EAL60749, EAL73588	EGC32423, EGC39224	KYQ91805, KYQ91861, KYQ92291	EGG23869	EFA81604
OG0000468	EAL72493, EAL72880, EAL73381, EAL73382, EAL73634, EDR41118	EGC28409, EGC34774	KYQ90785
OG0000469	EAL73452, EAL73453, EEU04161	EGC28915, EGC33803, EGC33811, EGC33901, EGC33902			EFA82287
OG0000470	EAL60496, EAL64990, EAL73482	EGC31823, EGC33972	KYQ92414	EGG19785, EGG22724	EFA84802
OG0000471	EAL66668, EAL73747	EGC29623	KYQ89954, KYQ90760, KYQ90786, KYQ90787, KYQ90879		EFA84506
OG0000472	EAL68302, EAL73086	EGC34354, EGC34543	KYQ94434	EGG13965, EGG19315	EFA78443, EFA83012
OG0000473	EAL60830, EAL61610, EAL73003, EAL73093, EAL73135	EGC36621, EGC37927, EGC39694, EGC40503
OG0000474	EAL66418, EAL71990	EGC35030, EGC37431	KYQ88501, KYQ90101	EGG14136, EGG21195	EFA80333
OG0000475	EAL72129	EGC38092, EGC38995	KYR01828	EGG17287, EGG21578, EGG21594, EGG23813	EFA84044
OG0000476	EAL70150, EAL70231, EAL70232, EAL70233, EAL71239, EAL72632	EGC40104		EGG21377	EFA86236
OG0000477	EAL72411, EAL72412, EAL72413, EAL72419, EAL72420	EGC28938	KYQ96777	EGG23224	EFA78367
OG0000478	EAL72415	EGC28367	KYQ93637, KYQ93638, KYQ93840, KYQ99685	EGG15426	EFA80353, EFA81281
OG0000479	EAL72737	EGC32582	KYQ90264, KYQ90980	EGG18061, EGG21687, EGG24021, EGG24022	EFA77408
OG0000480	EAL61279, EAL61660	EGC28265, EGC35776	KYQ92331, KYR02475	EGG18003, EGG20593	EFA84341
OG0000481	EAL61773, EAL61774, EAL61775, EAL61777, EAL61792, EAL61824	EGC37396, EGC38465, EGC39524
OG0000482	EAL67828, EDR41021	EGC33289, EGC38658	KYQ99740	EGG15964, EGG25327	EFA75007, EFA82967
OG0000483	EAL61288, EAL67321	EGC35649, EGC36810, EGC36823, EGC37853	KYQ93769		EFA76945, EFA86571
OG0000484	EAL61178, EAL66217	EGC34229, EGC39414	KYQ92407, KYQ93335	EGG20806	EFA80195, EFA80927
OG0000485	EAL61231, EAL64606	EGC30798, EGC39941	KYQ90638, KYQ93059	EGG21356	EFA77947, EFA80967
OG0000486	EAL60856	EGC38734	KYQ91161, KYQ93593	EGG18226, EGG20141	EFA77665, EFA84503, EFA84504
OG0000487	EAL60889	EGC34147	KYQ91028	EGG23244, EGG23250, EGG23253	EFA81313, EFA81490, EFA86287
OG0000488	EAL60808, EAL66691	EGC34698, EGC37712	KYQ99914	EGG15756, EGG18417	EFA76726, EFA81613
OG0000489	EAL60716		KYQ93228	EGG16158, EGG16197, EGG19720, EGG19765, EGG19913, EGG20062	EFA77424
OG0000490	EAL60511	EGC33981	KYR02074, KYR02304	EGG22085, EGG23070, EGG24035, EGG24705	EFA79667
OG0000491	EAL71425	EGC29757, EGC34070, EGC34464, EGC36139, EGC36140	KYQ90910	EGG16383	EFA76830
OG0000492	EAL71398	EGC32983, EGC34708, EGC35784	KYR00473	EGG24838	EFA78141, EFA82188, EFA82252
OG0000493	EAL69334, EAL71378	EGC31861	KYQ89328, KYR02825, KYR02826	EGG21289	EFA78081, EFA79298
OG0000494	EAL66347, EAS66952	EGC29994, EGC31946, EGC32922	KYQ93720	EGG15350	EFA79271, EFA80548
OG0000495	EAL70468, EAL70955, EEU04113	EGC35555, EGC35556, EGC37356	KYQ94295	EGG24283	EFA75625
OG0000496	EAL67427, EAL70593, EAL70752	EGC29573, EGC37925	KYR02134	EGG25186	EFA77761, EFA78176
OG0000497	EAL70585, EAL70759	EGC34082, EGC34092, EGC34093	KYQ91387	EGG13837, EGG13838	EFA75823
OG0000498	EAL70690, EAL70736	EGC29783	KYR01753	EGG15477, EGG17395, EGG23409, EGG23946	EFA80210
OG0000499	EAL67224, EAL70040	EGC36095	KYQ89275, KYQ90498	EGG15661, EGG19461	EFA76212, EFA82378
OG0000500	EAL69950	EGC33020, EGC33021, EGC35232, EGC37539	KYQ91489	EGG14347, EGG16016	EFA85174
OG0000501	EAL66541, EAL70375	EGC36626	KYQ90093, KYQ94406	EGG19971, EGG23911	EFA82162, EFA84280
OG0000502	EAL64297, EAL68071, EAL70008	EGC36351, EGC36352, EGC36353, EGC39561, EGC40379		EGG25388
OG0000503	EAL69840, EAL69841, EAL69842	EGC36595, EGC36596	KYQ92788	EGG23737	EFA75038, EFA85801
OG0000504	EAL65758, EAL69633	EGC31186, EGC31594	KYQ88988	EGG14982, EGG21427	EFA83847, EFA86597
OG0000505	EAL69406	EGC38018	KYQ89472	EGG16191, EGG19780, EGG20976, EGG22025, EGG24806	EFA80043
OG0000506	EAL65130, EAL69373	EGC36127	KYQ91264, KYQ96944	EGG18319, EGG19935	EFA80791, EFA84416
OG0000507	EAL69323	EGC31497	KYQ88469	EGG13786	EFA80269, EFA85262, EFA85269, EFA85307, EFA85308
OG0000508	EAL69261	EGC38035	KYQ93027	EGG13563	EFA81005, EFA81177, EFA82132, EFA82133, EFA86580
OG0000509	EAL64328, EAL64330, EAL69226	EGC31139, EGC35901, EGC37130	KYR00923	EGG18597	EFA79749
OG0000510	EAL65047, EAL69172	EGC30552, EGC33316		EGG17201, EGG17672, EGG23495	EFA86151, EFA86152
OG0000511	EAL69234	EGC36070, EGC39449	KYQ89517, KYQ90832	EGG19788, EGG22896	EFA77536, EFA85971
OG0000512	EAL64265, EAL68944	EGC28670, EGC39804	KYQ93656, KYQ99975	EGG16220, EGG20005	EFA84119
OG0000513	EAL68908	EGC31975	KYR01167	EGG18427, EGG19454, EGG21951	EFA81312, EFA81381, EFA81383
OG0000514	EAL63956, EAL66116, EAL68917	EGC28458, EGC29493, EGC34081, EGC38057, EGC40480	KYQ91642
OG0000515	EAL64813, EAL68720	EGC32173, EGC37547	KYQ99700, KYR01419	EGG21602, EGG21603, EGG21604
OG0000516	EAL68587	EGC29695, EGC40438, EGC40475	KYQ90444	EGG20243	EFA79311, EFA85006, EFA85704
OG0000517	EAL66577, EAL66580, EAL66663, EAL68485	EGC29430, EGC29431, EGC29432, EGC29434, EGC31143
OG0000518	EAL66379, EAL68320	EGC32925	KYQ89104	EGG14065, EGG20835	EFA83724, EFA83725, EFA83728
OG0000519	EAL67555	EGC30977	KYR01827, KYR01829	EGG16479, EGG19811	EFA82125, EFA84460, EFA86557
OG0000520	EAL66993, EAL67288	EGC34661, EGC37521	KYQ89704, KYQ89710	EGG17505	EFA85090, EFA85093
OG0000521	EAL67332, EAS66857	EGC31113	KYQ88845, KYQ92355	EGG16799, EGG17670, EGG24322	EFA78413
OG0000522	EAL67035	EGC39639	KYQ91902, KYQ92131	EGG24137	EFA79096, EFA84117, EFA84179, EFA86467
OG0000523	EAL66866	EGC28977, EGC39586	KYR02172	EGG20777	EFA81969, EFA81971, EFA84751, EFA85296
OG0000524	EAL65920	EGC36727	KYQ92776	EGG16562, EGG21436	EFA77393, EFA77394, EFA77805, EFA84469
OG0000525	EAL65333, EAL65522	EGC29191, EGC29852, EGC30723, EGC31119	KYR01116	EGG14698	EFA78937
OG0000526	EAL65166, EAL65201	EGC32950, EGC33310, EGC33441			EFA75190, EFA83798, EFA83799, EFA83858
OG0000527	EAL64075, EAL65189	EGC33829, EGC34455	KYQ88777, KYQ89540	EGG18954	EFA79995, EFA86204
OG0000528	EAL64965, EAL64966	EGC30594	KYQ93160, KYQ93161, KYQ93971	EGG21756	EFA78009, EFA82184
OG0000529	EAL64483	EGC31742, EGC31745, EGC31746	KYQ92865, KYQ93587	EGG19590, EGG21906	EFA81901
OG0000530	EAL64198	EGC28344	KYQ89690, KYQ89798, KYQ89810	EGG23805, EGG24407, EGG25021	EFA80359
OG0000531				EGG13367, EGG14026, EGG15874, EGG15893, EGG16012, EGG18076, EGG19482, EGG20605, EGG20629
OG0000532		EGC32470		EGG18721, EGG18722, EGG18723, EGG24042, EGG25019	EFA78182, EFA78183, EFA84675
OG0000533				EGG13854, EGG16678, EGG19169, EGG19820, EGG21413, EGG22900, EGG23550, EGG23673, EGG24558
OG0000534			KYQ96964	EGG19364, EGG19948, EGG20178, EGG20516, EGG25032	EFA74521, EFA77170, EFA77174
OG0000535			KYR02795	EGG18330, EGG18929, EGG18939, EGG18940, EGG19278, EGG21973, EGG25228	EFA80797
OG0000536			KYQ91472, KYQ93497, KYR00041	EGG13823	EFA79382, EFA79383, EFA79394, EFA79397, EFA79400
OG0000537			KYQ88826, KYQ92890, KYQ94113, KYQ96644, KYQ96822, KYQ99791, KYR00322, KYR02283, KYR02847
OG0000538		EGC28766, EGC31760, EGC32518, EGC32519, EGC33233, EGC39063, EGC39482	KYQ88872, KYR02667
OG0000539					EFA74923, EFA78679, EFA78790, EFA80153, EFA81526, EFA84171, EFA84319, EFA84565, EFA86840
OG0000540					EFA75066, EFA75068, EFA75221, EFA76662, EFA79750, EFA82843, EFA84023, EFA85815, EFA86325
OG0000541					EFA78691, EFA78878, EFA78883, EFA78894, EFA78895, EFA78899, EFA78902, EFA82494, EFA84887
OG0000542	EDR41048	EGC37327	KYQ91000, KYQ93981, KYR02760	EGG23083	EFA78221, EFA79441
OG0000543	EAL63723, EAL65882, EAL65902, EAL67798, EAL72092	EGC37511	KYR02893		EFA86428
OG0000544	EAL63762, EAL64166	EGC31478		EGG14549, EGG14551	EFA75210, EFA75211, EFA75264
OG0000545	EAL63654	EGC35108	KYR03048	EGG15450, EGG17742, EGG17926, EGG17927	EFA83756
OG0000546	EAL61868, EAL61869, EAL63636, EAL72813	EGC33239, EGC38871	KYQ91198	EGG18233
OG0000547	EAL63644, EAL65253	EGC28644, EGC34307	KYQ89574	EGG20192	EFA78723, EFA79875
OG0000548	EAL63632	EGC32823	KYQ90226, KYQ93365, KYR02412	EGG17740, EGG21257	EFA85965
OG0000549	EAL63507	EGC32736	KYQ99654	EGG25099	EFA78961, EFA85800, EFA86453, EFA86454
OG0000550	EAL63431, EAL73063	EGC30491	KYQ90596	EGG18200, EGG23255	EFA74692, EFA74693
OG0000551	EAL63451, EAL73313	EGC31504, EGC32567, EGC33323, EGC33668			EFA75450, EFA75451
OG0000552	EAL62717, EAL63409	EGC29256, EGC31058	KYR02203	EGG15705, EGG20049	EFA84815
OG0000553	EAL63341, EAL64386	EGC39112	KYQ90716	EGG20582, EGG21400	EFA75322, EFA75325
OG0000554	EAL63285, EAL69018	EGC35295, EGC37575	KYR02160, KYR02161	EGG13574	EFA83436
OG0000555	EAL60503, EAL63011	EGC29574, EGC39515, EGC39516	KYQ91081	EGG23690	EFA76093
OG0000556	EAL60614, EAL62982	EGC33113	KYR02691, KYR02693	EGG23537	EFA83941, EFA83944
OG0000557	EAL62947, EAL66566	EGC31858, EGC37921	KYR01393	EGG19003	EFA78244, EFA78343
OG0000558	EAL62888, EAL69835	EGC33058	KYQ88418, KYQ91239	EGG14297	EFA75920, EFA85961
OG0000559	EAL62826	EGC28581, EGC34906, EGC35658, EGC37542	KYQ94423	EGG17282	EFA84339
OG0000560	EAL62783, EAL66325		KYQ92636, KYQ99984	EGG14578, EGG21927	EFA79136, EFA82314
OG0000561	EAL62707, EAL72365, EAL72366	EGC30707, EGC32655	KYQ88377	EGG13752	EFA84726
OG0000562	EAL62566, EAL62607	EGC29254, EGC30948	KYQ88732	EGG22108	EFA81967, EFA81968
OG0000563	EAL62589	EGC36298	KYQ93225	EGG14504, EGG24253	EFA74859, EFA74860, EFA80709
OG0000564	EAL62531	EGC32261	KYQ91509	EGG21255	EFA75294, EFA86832, EFA86837, EFA86841
OG0000565	EAL62269, EAL62301, EAL62307, EAL65901, EAL66214, EAL66263, EAL68619	EGC33606
OG0000566	EAL61005, EAL62285	EGC33174, EGC35657	KYR02339	EGG15398, EGG21014	EFA78991
OG0000567	EAL62286, EAL69977	EGC34677, EGC38666	KYR00507, KYR00590	EGG17104	EFA80250
OG0000568	EAL62100, EAL62128, EAL62129	EGC35184	KYR00856	EGG24023	EFA75954, EFA78380
OG0000569	EAL61092, EAL61093, EAL62092, EAL64959, EAL64973, EAL65001, EAL65007	EGC37313
OG0000570	EAL62036, EAL62044, EAL62045, EAL67457	EGC29632, EGC37846, EGC37875, EGC40386
OG0000571	EAL61950, EAL64863	EGC31353, EGC38883	KYQ93734, KYQ96848	EGG21138	EFA85465
OG0000572	EAL61416, EAL61936, EAL65697	EGC37663, EGC40498	KYQ88427		EFA79597, EFA83669
OG0000573	EAL61232, EAL65034, EAL67685, EAL73260	EGC29742, EGC30920, EGC35298, EGC37552
OG0000574	EAL60579, EAL73273	EGC34578, EGC39955	KYQ93005, KYR03129	EGG14905	EFA76673
OG0000575	EAL73699	EGC29062, EGC35156, EGC39119	KYQ92875, KYR00275	EGG17365	EFA76801
OG0000576	EAL73466	EGC28517, EGC33657	KYQ89632, KYQ91818, KYQ92806	EGG19231	EFA76243
OG0000577	EAL68208, EAL73498	EGC30398, EGC40412		EGG13987	EFA75187, EFA83594, EFA83688
OG0000578	EAL66777, EAL73505	EGC34150, EGC36694	KYQ89293, KYQ93726	EGG16939	EFA80836
OG0000579	EAL68830, EAL70983, EAL73048	EGC28334, EGC29507, EGC29614, EGC40207			EFA82055
OG0000580	EAL72917	EGC29967, EGC34646, EGC34647, EGC37869, EGC38584, EGC39289, EGC40309
OG0000581	EAL73096	EGC29974, EGC30483	KYQ91388	EGG18467, EGG18468	EFA75514, EFA75515
OG0000582	EAL73013, EAL73014, EAL73015	EGC35672, EGC35673, EGC35674, EGC35675, EGC35676
OG0000583	EAL72025, EAL73017, EDR41080	EGC34851, EGC36434	KYQ89375	EGG24198	EFA77433
OG0000584	EAL73021	EGC35297	KYQ90759	EGG20957	EFA75289, EFA77300, EFA79654, EFA84787
OG0000585	EAL71917, EAL71918	EGC38986	KYQ88293, KYQ96813	EGG22355	EFA77061, EFA84695
OG0000586	EAL64817, EAS66933	EGC31437, EGC35561, EGC38083	KYQ93730	EGG19896	EFA77163
OG0000587	EAL68969, EAL72142, EAL72633	EGC29978	KYQ88831	EGG15454, EGG15978	EFA82204
OG0000588	EAL72641	EGC32203	KYQ88744, KYR01715	EGG23865	EFA78078, EFA83705, EFA86525
OG0000589	EAL71951	EGC31774		EGG21403, EGG24041	EFA76792, EFA76793, EFA76794, EFA76795
OG0000590	EAL68699, EAL72817	EGC37629	KYQ89288	EGG20270	EFA74809, EFA83427, EFA83435
OG0000591	EAL72681, EAL72839, EAS66905	EGC35336, EGC38960	KYR02394	EGG22677	EFA84537
OG0000592	EAL70090, EAL72861	EGC35532, EGC35565	KYQ99855, KYQ99944	EGG23412	EFA86825
OG0000593	EAL60558, EAL72379, EAL72380	EGC35575, EGC35585, EGC35586, EGC35587	KYR01280
OG0000594	EAL70458, EAL71076, EAL72394, EAL72397	EGC32163, EGC32996, EGC34363		EGG15044
OG0000595	EAL65627, EAL65628, EAL72713	EGC33850, EGC39832		EGG14967, EGG14968	EFA85425
OG0000596	EAL72480	EGC28702, EGC33409, EGC35839, EGC36232	KYQ90165	EGG24518	EFA82179
OG0000597	EAL72520	EGC40380	KYQ92807, KYR02250	EGG24510, EGG25011	EFA78261, EFA85399
OG0000598	EAL72558	EGC28939	KYR02520	EGG21908	EFA74539, EFA74546, EFA78499, EFA86799
OG0000599	EAL61634, EAL71866, EAL71868	EGC33822, EGC33823		EGG15620, EGG15895	EFA76998
OG0000600	EAL61754, EAL61755, EAL61759, EAL61760, EAL61805, EAL61806, EAL61825, EAL67097
OG0000601	EDR41017	EGC28603, EGC28604, EGC33792	KYQ93849, KYR01354	EGG19096	EFA76394
OG0000602	EAL61475, EAL61501	EGC31743, EGC31744, EGC32874	KYQ88860	EGG15287	EFA83334
OG0000603	EAL61395, EAL64517	EGC32332, EGC32333, EGC32334		EGG18824, EGG18825	EFA80782
OG0000604	EAL61408	EGC28448, EGC39784, EGC39785, EGC39793	KYQ89991	EGG16014	EFA76120
OG0000605	EAL61235, EAL61236, EAL66227, EAL67494, EAL67500, EAL68450, EAL71563	EGC36988
OG0000606	EAL60919				EFA74649, EFA80107, EFA82062, EFA82400, EFA82424, EFA82426, EFA82467
OG0000607	EAL60845, EAL68167	EGC28450, EGC32422, EGC35207, EGC35208, EGC39923, EGC39931
OG0000608	EAL60750	EGC38754, EGC38759, EGC40062	KYR01450	EGG16064, EGG24385	EFA76348
OG0000609	EAL60745, EAL71765	EGC38401, EGC38857	KYQ96771	EGG25147	EFA77219, EFA84510
OG0000610	EAL60721	EGC38102	KYQ88935	EGG17681, EGG19851	EFA76459, EFA76461, EFA83580
OG0000611	EAL60583, EAL66107	EGC28701	KYQ92664	EGG17698, EGG22618, EGG22741	EFA82268
OG0000612	EAL60645	EGC29128, EGC34105, EGC36655, EGC38021	KYQ88274		EFA80759, EFA85725
OG0000613	EAL60544, EAL65372	EGC32124, EGC35767, EGC36248, EGC39760, EGC39761			EFA75344
OG0000614	EAL71636	EGC30312	KYQ91344, KYR00157	EGG19688, EGG23694	EFA78071, EFA80763
OG0000615	EAL64805, EAL66838, EAL71455	EGC32601, EGC36484, EGC38301	KYQ94017, KYR00975
OG0000616	EAL71306	EGC29024, EGC29025	KYQ90611	EGG19763, EGG19769	EFA84487, EFA84488
OG0000617	EAL65464, EAL71241	EGC40516	KYQ90237, KYR01205	EGG17035, EGG17982	EFA76104
OG0000618	EAL68667, EAL68668, EAL70456, EAL71035	EGC31657, EGC34937	KYQ91558		EFA86567
OG0000619	EAL67512, EAL69193, EAL70191	EGC29111, EGC35643	KYQ89742	EGG20722	EFA81599
OG0000620	EAL70061	EGC40039	KYQ99899	EGG19301, EGG24913, EGG24914, EGG24915	EFA75545
OG0000621	EAL70260	EGC32057, EGC36937	KYQ89967	EGG17133, EGG17164	EFA83692, EFA85080
OG0000622	EAL70306	EGC31366, EGC31790, EGC31796, EGC34337	KYQ92242	EGG17090	EFA75503
OG0000623	EAL70362	EGC35403, EGC35411, EGC38171, EGC38172	KYR01798	EGG21865	EFA82675
OG0000624	EAL70089	EGC32038, EGC40546	KYR00526	EGG23092, EGG23093	EFA80372, EFA80373
OG0000625	EAL67826, EAL69992, EEU04110, EEU04111	EGC36738		EGG17796	EFA84277, EFA84279
OG0000626	EAL66302, EAL69828	EGC29959, EGC39202	KYR01984, KYR02135	EGG17863	EFA78035
OG0000627	EAL69813	EGC39964	KYR00529	EGG24691	EFA77968, EFA78115, EFA78123, EFA86820
OG0000628	EAL65557, EAL65558, EAL69920	EGC34509, EGC34510	KYR01646	EGG18561	EFA83855
OG0000629	EAL69771	EGC34605		EGG14806, EGG19488, EGG19745, EGG21507, EGG24271, EGG24272
OG0000630	EAL69662	EGC37502	KYQ91748, KYQ93144	EGG14664, EGG19950, EGG23890	EFA80531
OG0000631	EAL69525, EAL69605, EAL69711	EGC31928, EGC33886, EGC36202, EGC39728, EGC39730
OG0000632	EAL69594, EAL69595	EGC32249, EGC32253	KYQ91324, KYQ91325	EGG18231	EFA84973
OG0000633	EAL69513	EGC34497	KYQ89569, KYQ93667	EGG21942, EGG24966	EFA79726, EFA84146
OG0000634	EAL67024, EAL69504, EAL69707	EGC40156	KYQ91374, KYQ91375	EGG23200	EFA80295
OG0000635	EAL68376, EAL69506, EAL69608	EGC34552, EGC38482	KYQ96963	EGG17808	EFA76961
OG0000636	EAL64964, EAL69454, EAL69455	EGC33653, EGC34889, EGC38100, EGC38402, EGC39309
OG0000637	EAL69383, EAS66859	EGC29706, EGC35076	KYQ91315, KYR02415	EGG20661	EFA74984
OG0000638	EAL69318	EGC30873, EGC33909, EGC35143	KYQ92800	EGG25164	EFA84215, EFA86582
OG0000639	EAL64107, EAL69306	EGC29330, EGC37530	KYQ94004	EGG20572	EFA78689, EFA82716
OG0000640	EAL69188, EAL69241	EGC37577, EGC39438	KYQ88432, KYQ89089	EGG21752	EFA79676
OG0000641	EAL69015, EAL69016	EGC28357	KYQ89901, KYR01785	EGG16171, EGG16173	EFA81991
OG0000642	EAL68892	EGC32914, EGC38113	KYR00472	EGG20099, EGG21025	EFA76370, EFA78247
OG0000643	EAL65892, EEU04119	EGC36512, EGC36529, EGC39568, EGC40441, EGC40458, EGC40459
OG0000644	EAL67231, EAL68851	EGC32613, EGC39259	KYQ93890	EGG14373	EFA79406, EFA84551
OG0000645	EAL68103	EGC37707	KYR00515	EGG17786, EGG23082	EFA75309, EFA79442, EFA79806
OG0000646	EAL67988	EGC30610	KYQ93121, KYQ96914	EGG14282, EGG14847	EFA75740, EFA79186
OG0000647	EAL66395, EAL68006	EGC31634	KYQ90955, KYQ92759	EGG14093, EGG20304	EFA83250
OG0000648	EAL68012, EAL68073	EGC39567	KYR00518, KYR00552	EGG18985	EFA85840, EFA85841
OG0000649	EAL67670, EAL67671	EGC30716	KYQ90828, KYQ90915	EGG17326	EFA77295, EFA78304
OG0000650	EAL67430, EAL67431	EGC28306, EGC33328	KYR00586	EGG16805, EGG16821	EFA85789
OG0000651	EAL67253	EGC34666	KYQ91688	EGG18568, EGG18569	EFA80903, EFA81732, EFA82858
OG0000652	EAL67368, EAL67369	EGC30571, EGC37295	KYQ92626	EGG17945, EGG17946	EFA81414
OG0000653	EAL65997, EAL66675	EGC34727	KYQ92580, KYQ99803	EGG21593, EGG21725	EFA85834
OG0000654	EAL66735	EGC28629	KYQ93713	EGG21863, EGG23298	EFA76866, EFA76919, EFA80808
OG0000655	EAL66630, EAL66631	EGC28806	KYQ99745, KYQ99746	EGG23324	EFA76051, EFA84839
OG0000656	EAL66490	EGC32331, EGC32941	KYQ90071	EGG14718, EGG23403	EFA75326, EFA77364
OG0000657	EAL66527		KYQ89623	EGG19312, EGG20271, EGG20272	EFA83049, EFA83696, EFA86782
OG0000658	EAL66383, EAL66396	EGC28734, EGC33268	KYQ90590, KYQ93646	EGG17963	EFA76283
OG0000659	EAL66368, EAL66369	EGC29956, EGC29960	KYQ92978	EGG17527, EGG17528	EFA86634
OG0000660	EAL64661, EAL66129	EGC30841	KYR02721	EGG23056	EFA78559, EFA80648, EFA83915
OG0000661	EAL66049, EAL66187	EGC30435, EGC30436	KYR01504	EGG13839	EFA83338, EFA83339
OG0000662	EAL65707	EGC33154, EGC33155	KYR02388, KYR02777	EGG14265, EGG15816	EFA82931
OG0000663	EAL65538	EGC34382, EGC36822, EGC38501	KYQ91812, KYQ92120	EGG17770	EFA79547
OG0000664	EAL64567, EAL65540	EGC29793, EGC32956	KYR01243, KYR01244	EGG24442	EFA81818
OG0000665	EAL65437	EGC28286, EGC28337	KYQ88739	EGG14941, EGG15130	EFA78174, EFA81677
OG0000666	EAL65242, EAL65302	EGC32800	KYQ89075, KYQ94109	EGG16353, EGG22433	EFA80532
OG0000667	EAL65311	EGC31278	KYQ96789	EGG24775, EGG24777, EGG24779, EGG24780	EFA84385
OG0000668	EAL64821, EAL64830, EAL65182	EGC31317, EGC31373, EGC32947, EGC37086	KYR02722
OG0000669	EAL64352, EAL64353, EAL64354	EGC39108, EGC39109	KYQ91182	EGG14964	EFA81025
OG0000670	EAL64310	EGC33586, EGC35939	KYQ93756, KYQ99830	EGG23194, EGG23195	EFA79277
OG0000671	EAL64257	EGC33022, EGC35919	KYQ89880, KYR02348	EGG14396	EFA78728, EFA78735
OG0000672	EAL64083	EGC30455, EGC31563, EGC37764, EGC37765, EGC38485, EGC40178, EGC40179
OG0000673	EAL64084, EAL64085	EGC28892, EGC35936, EGC35937	KYQ91567	EGG18054, EGG18055
OG0000674	EAL63951	EGC32571, EGC32654	KYQ89581, KYQ91903, KYQ92123, KYQ93470		EFA77909
OG0000675			KYQ93204	EGG21734, EGG24214	EFA74624, EFA75239, EFA78498, EFA79569, EFA83347
OG0000676			KYQ88204, KYQ91206, KYR00335	EGG14812, EGG16920	EFA79596, EFA79700, EFA82042
OG0000677		EGC28459, EGC29921	KYQ91639, KYQ92668, KYQ92962	EGG17573, EGG20881	EFA76012
OG0000678			KYQ88158, KYQ90017, KYQ91404, KYQ92398, KYR00419	EGG13297, EGG13298	EFA83093
OG0000679		EGC29670, EGC30526, EGC30531, EGC33500, EGC36239, EGC36536, EGC36747		EGG13919
OG0000680				EGG18519, EGG18521, EGG18689	EFA75156, EFA79183, EFA83385, EFA83387, EFA83390
OG0000681			KYQ90004, KYQ90342, KYQ94196, KYQ94200, KYR00246, KYR00782, KYR01236	EGG18581
OG0000682				EGG14621, EGG23674	EFA81834, EFA82363, EFA82386, EFA84172, EFA84210, EFA86017
OG0000683				EGG23722	EFA78876, EFA82001, EFA82002, EFA82088, EFA82091, EFA82092, EFA83007
OG0000684			KYQ89845, KYQ91922, KYQ92036, KYQ92761, KYQ92766, KYQ92795, KYR02021, KYR02023
OG0000685		EGC29759, EGC30751, EGC31487, EGC31748, EGC39506	KYQ96765		EFA80679, EFA82421
OG0000686			KYQ88653, KYQ88912, KYQ88913, KYQ93234, KYQ93235, KYQ99880, KYR01660		EFA82498
OG0000687			KYQ88423, KYQ88424, KYQ89147, KYQ89434, KYQ90355, KYQ90470, KYQ90849, KYQ92127
OG0000688			KYQ88710, KYQ90544, KYQ90671, KYQ92497, KYR00327, KYR02822, KYR02931		EFA76164
OG0000689		EGC28418, EGC29542, EGC30501, EGC31075, EGC31766, EGC32014, EGC34936, EGC36113
OG0000690		EGC33839, EGC36418			EFA77041, EFA78662, EFA81205, EFA83398, EFA85797, EFA86294
OG0000691					EFA79786, EFA79787, EFA79788, EFA79790, EFA81980, EFA85734, EFA85735, EFA85736
OG0000692					EFA78212, EFA82330, EFA82334, EFA82359, EFA84892, EFA84895, EFA84901, EFA84998
OG0000693	EAL63806	EGC31618	KYQ91783, KYQ93710	EGG13668	EFA74514, EFA85382
OG0000694	EAL63737, EAL66524, EAL68742	EGC30673, EGC30674	KYQ91597		EFA85019
OG0000695	EAL61772, EAL63751, EAL69607	EGC32033	KYQ91408	EGG18540	EFA84598
OG0000696	EAL63647, EAL68787	EGC36777	KYQ89786, KYQ93761	EGG16189, EGG22100
OG0000697	EAL63426	EGC30425	KYQ89825, KYQ96747	EGG16162	EFA81353, EFA83913
OG0000698	EAL63456	EGC35062	KYQ92873, KYR00427	EGG13721	EFA80527, EFA81132
OG0000699	EAL63392, EAL63393	EGC33796	KYQ91240	EGG17296	EFA79933, EFA85178
OG0000700	EAL63214, EAL63217	EGC37315, EGC37339	KYQ91850	EGG17614	EFA78177
OG0000701	EAL63108, EAL63109	EGC32976, EGC32977	KYQ92087	EGG25175	EFA83356
OG0000702	EAL63112, EAL72055	EGC33789, EGC39175	KYQ94446	EGG17283	EFA84338
OG0000703	EAL63094, EAL72948	EGC34806	KYQ89691, KYQ99785	EGG13534	EFA82229
OG0000704	EAL68388, EEU04063	EGC37549, EGC39637	KYQ94342	EGG17101	EFA81373
OG0000705	EAL62933, EAL63016, EAL63017	EGC36791	KYQ91517	EGG23402	EFA86742
OG0000706	EAL62989, EAL73259	EGC29889	KYQ91071	EGG25308	EFA75488, EFA80336
OG0000707	EAL62925	EGC33121	KYQ88504	EGG16492, EGG25357	EFA82350, EFA82351
OG0000708	EAL62790, EAL64092, EAL71337, EAL71371	EGC30960, EGC37622, EGC38780
OG0000709	EAL62617	EGC32239	KYQ93810	EGG16394, EGG21571	EFA75695, EFA86382
OG0000710	EAL61608, EAL62541	EGC36360	KYQ91823	EGG20680, EGG23223	EFA81291
OG0000711	EAL62518, EAL63914	EGC30452, EGC36400	KYQ91557	EGG21262	EFA86828
OG0000712	EAL62462, EAL69514	EGC29702, EGC39173	KYQ91323	EGG20088	EFA75828
OG0000713	EAL62277	EGC28850, EGC38009	KYQ90142	EGG19221, EGG20090	EFA75822
OG0000714	EAL62204, EAL69296	EGC34059	KYQ88959	EGG15025, EGG22798	EFA77260
OG0000715	EAL62243	EGC36640, EGC36658	KYR00025, KYR00030	EGG21589	EFA83939
OG0000716	EAL60862, EAL62132, EAL67280, EEU04147				EFA74696, EFA77526, EFA79318
OG0000717	EAL62194, EEU04126	EGC35615, EGC39501, EGC40533	KYQ92241		EFA83428
OG0000718	EAL62154	EGC35613	KYR00737, KYR02042	EGG16701	EFA76022, EFA81949
OG0000719	EAL62175	EGC38495	KYQ88725	EGG13927	EFA82653, EFA82703, EFA82745
OG0000720	EAL62056, EAL73542	EGC32256, EGC34356	KYQ92309	EGG16069	EFA83581
OG0000721	EAL61879, EAL61909	EGC38873	KYR01077	EGG15279, EGG18656	EFA83712
OG0000722	EAL73205	EGC33488, EGC36393, EGC39225	KYQ91806	EGG17635	EFA79551
OG0000723	EAL73208	EGC37670	KYQ91810	EGG15451, EGG24438	EFA75054, EFA84175
OG0000724	EAL73162	EGC29159, EGC31481, EGC39633	KYR02418	EGG16639	EFA86435
OG0000725	EAL73701	EGC32379	KYQ88811, KYR01630, KYR01858	EGG21673	EFA78582
OG0000726	EAL67264, EAL73300, EAL73334, EAL73624	EGC34257		EGG17909	EFA74976
OG0000727	EAL73309	EGC35875	KYQ96782	EGG17980, EGG18354	EFA75938, EFA78210
OG0000728	EAL60581, EAL73640	EGC34439	KYR01855	EGG19472, EGG24663	EFA81700
OG0000729	EAL72367, EAL73401, EAL73557			EGG20967, EGG20968, EGG24727, EGG24729
OG0000730	EAL73723, EAL73725	EGC34433	KYQ88481, KYR02503	EGG16307	EFA80522
OG0000731	EAL67232, EAL73417	EGC29401, EGC30078	KYR00559	EGG13892	EFA81285
OG0000732	EAL68407, EAL73432	EGC36707	KYR01845	EGG23261	EFA78835, EFA84818
OG0000733	EAL73658	EGC34305	KYR02227	EGG14376, EGG19456	EFA79803, EFA85862
OG0000734	EAL73459	EGC30901	KYQ89656, KYQ90728	EGG19784	EFA76029, EFA83950
OG0000735	EAL73469, EAL73664	EGC37084, EGC37085	KYQ89630	EGG21445	EFA76236
OG0000736	EAL73735	EGC39574	KYQ88219, KYR00191	EGG16775	EFA83827, EFA85155
OG0000737	EAL73512	EGC32322	KYQ90059, KYQ90060, KYQ90061, KYR02665		EFA82965
OG0000738	EAL73525	EGC34842, EGC34843	KYQ89471		EFA77641, EFA77643, EFA77644
OG0000739	EAL73749, EDR41124, EEU04162	EGC34991	KYQ90260	EGG22757	EFA84098
OG0000740	EAL72300, EAL73555	EGC39100	KYQ99721, KYR01838		EFA80643, EFA85984
OG0000741	EAL65898, EAL73560	EGC35938	KYQ93385	EGG24313	EFA77097, EFA79459
OG0000742	EAL73577, EAL73578	EGC29788	KYQ89312, KYQ93132, KYQ93133, KYR01279
OG0000743	EAL65550, EAL73113	EGC40339	KYQ99798	EGG16235, EGG19628	EFA80664
OG0000744	EAL63987, EAL72981, EAL73087	EGC30419	KYR02330	EGG14083	EFA86239
OG0000745	EAL72326, EAL72984	EGC29142, EGC40343	KYQ91160	EGG17144	EFA83532
OG0000746	EAL70544, EAL70898, EAL73137	EGC29779, EGC33744	KYQ91550		EFA77113
OG0000747	EAL72065, EAL72066	EGC39012, EGC39013	KYR00531	EGG24470	EFA81938
OG0000748	EAL61450, EAL66308, EAL66309, EAL69797, EAL72091, EDR41015		KYQ91630
OG0000749	EAL71930, EAS66935	EGC30503	KYQ94038	EGG23733	EFA78828, EFA84396
OG0000750	EAL71588, EAL72105	EGC38603, EGC39425	KYQ91131	EGG23838	EFA83184
OG0000751	EAL72125	EGC32421, EGC36506	KYR00130	EGG21030	EFA83833, EFA83834
OG0000752	EAL65408, EAL72147	EGC31580, EGC32868	KYQ90471	EGG14719	EFA83350
OG0000753	EAL72645, EAL72646	EGC31961	KYR00257, KYR00258	EGG16979	EFA81495
OG0000754	EAL72685	EGC38962	KYQ89958	EGG24449	EFA77597, EFA77599, EFA82031
OG0000755	EAL70498, EAL70843, EAL71965	EGC37919	KYR02280	EGG20011	EFA82657
OG0000756	EAL69733, EAL72377	EGC39267	KYR01908	EGG17071, EGG20956	EFA80259
OG0000757	EAL72711	EGC35168, EGC35169, EGC35170	KYQ93985	EGG20266	EFA84424
OG0000758	EAL72427	EGC29241, EGC30857, EGC36108	KYQ96769	EGG19451	EFA84351
OG0000759	EAS66940	EGC34848	KYQ88558, KYQ88562	EGG15324	EFA81163, EFA81164
OG0000760	EAL72500, EAL72502, EAL72505	EGC36174	KYQ92967	EGG19842	EFA82725
OG0000761	EAL64200, EAL72503	EGC29648, EGC36156	KYQ92973	EGG19843	EFA82736
OG0000762	EAL72883, EEU04154	EGC35229, EGC38932	KYR02529	EGG20584	EFA83001
OG0000763	EAL71551, EAL71746, EAL71916	EGC34577		EGG15093, EGG19444	EFA79535
OG0000764	EAL61622	EGC36821, EGC39314	KYQ88794	EGG21939	EFA74508, EFA77862
OG0000765	EAL61689, EAL61697, EAL61811	EGC32397	KYQ92566	EGG21351	EFA77953
OG0000766	EAL61722, EAL65445		KYQ89186	EGG18012, EGG24298	EFA75923, EFA79982
OG0000767	EAL61355	EGC39824	KYR01341	EGG15793	EFA74835, EFA74836, EFA84230
OG0000768	EAL61383	EGC35782	KYQ93600	EGG18432, EGG21122	EFA76355, EFA85456
OG0000769	EAL61393	EGC39791	KYQ89479, KYR00545	EGG18316	EFA80769, EFA83229
OG0000770	EAL61348	EGC39233	KYQ93072	EGG23529, EGG23530	EFA83439, EFA83440
OG0000771	EAL61422	EGC37837, EGC37838	KYR00700	EGG22230, EGG22231	EFA78620
OG0000772	EAL61323	EGC32447	KYR01069	EGG21274	EFA82538, EFA82571, EFA82572
OG0000773	EAL61168, EAL61169	EGC29201, EGC29514	KYQ88379	EGG20401	EFA85250
OG0000774	EAL61106, EAL66196, EAL66249	EGC39628	KYQ92295	EGG16124	EFA82203
OG0000775	EAL60991, EAL71471	EGC33847, EGC34327	KYR01837	EGG16862	EFA75191
OG0000776	EAL60761	EGC31896	KYR00365, KYR00366	EGG14975	EFA81623, EFA81624
OG0000777	EAL60494	EGC39535	KYQ93130	EGG17574	EFA80408, EFA82905, EFA82906
OG0000778	EAL71775	EGC38536	KYQ89107, KYR02220	EGG18434	EFA81728, EFA86518
OG0000779	EAL71865		KYQ88891, KYR00404	EGG15063, EGG19328	EFA76876, EFA81931
OG0000780	EAL65650, EAL71503	EGC29287	KYQ93965	EGG23377	EFA76535, EFA76536
OG0000781	EAL66202, EAL71492	EGC29858	KYQ90110, KYQ90753	EGG22676	EFA80928
OG0000782	EAL66109, EAL71284, EAL71431			EGG16999	EFA82607, EFA83252, EFA84644
OG0000783	EAL71441	EGC28569, EGC28937, EGC34422	KYQ92491		EFA86768, EFA86769
OG0000784	EAL70543, EAL70826, EAL71251	EGC37689, EGC40385	KYQ93409, KYR01759
OG0000785	EAL71392	EGC39705	KYQ92381	EGG22494	EFA76513, EFA76663, EFA86797
OG0000786	EAL65199, EAL71185	EGC29491, EGC37474	KYQ90810	EGG14274	EFA79464
OG0000787	EAL71137	EGC33535, EGC39681	KYQ92823, KYQ94421	EGG19043	EFA85508
OG0000788	EAL70444, EAL70945	EGC33194	KYQ90215	EGG20803	EFA74725, EFA78348
OG0000789	EAL70439, EAL71080	EGC28790		EGG20123, EGG22800, EGG25380	EFA83789
OG0000790	EAL70625, EAL70780	EGC30460, EGC30943	KYQ88695	EGG16393	EFA75617
OG0000791	EAL64043, EAL70618, EEU04136	EGC36730	KYQ88734, KYQ88735, KYQ94231
OG0000792	EAL70561, EAL70895	EGC34087	KYR03044		EFA75484, EFA86661, EFA86662
OG0000793	EAL70555, EAL70817	EGC38445, EGC38446	KYQ91236	EGG21766	EFA83028
OG0000794	EAL70550, EAL70822	EGC37898	KYR02113	EGG21315	EFA78954, EFA78956
OG0000795	EAL70528, EAL70835	EGC30713	KYQ91143	EGG17701, EGG25005	EFA74898
OG0000796	EAL70527, EAL70836	EGC28262, EGC28652	KYQ89731	EGG21139	EFA78041
OG0000797	EAL70497, EAL70911	EGC37900	KYQ88632	EGG17166	EFA75942, EFA77236
OG0000798	EAL70494, EAL70789	EGC38454	KYQ89429, KYQ94063	EGG21309	EFA76748
OG0000799	EAL70654, EAL70722	EGC29780, EGC33947	KYQ99915	EGG19885	EFA77738
OG0000800	EAL65086, EAL70675, EAL70703	EGC30482, EGC31699	KYQ91753		EFA77000
OG0000801	EAL70250	EGC30124, EGC31522, EGC35009, EGC36666, EGC39902	KYQ92268
OG0000802	EAL66093, EAL70249	EGC35531, EGC40476	KYQ99850	EGG24921	EFA75542
OG0000803	EAL70170	EGC32066	KYQ91139, KYQ92597, KYQ92632	EGG22339	EFA76551
OG0000804	EAL70321, EAL70322	EGC34345	KYQ92894	EGG19483, EGG21709	EFA80375
OG0000805	EAL70014	EGC32598, EGC32599, EGC40604	KYQ92893	EGG23731	EFA74778
OG0000806	EAL70160	EGC29352	KYQ92778	EGG18617, EGG22988, EGG22989	EFA84070
OG0000807	EAL70194	EGC30445, EGC39046, EGC39048	KYR02786	EGG21584	EFA85536
OG0000808	EAL70147, EAL70230, EAL70333, EAL70334	EGC37035		EGG24354	EFA80335
OG0000809	EAL68899, EAL70009	EGC31304, EGC36663	KYQ93032	EGG18703	EFA76415
OG0000810	EAL69789, EDR41077	EGC37429	KYR02714	EGG24336, EGG24338	EFA83082
OG0000811	EAL69805	EGC36080, EGC36363, EGC36368	KYQ91751	EGG13265	EFA80239
OG0000812	EAL69551	EGC37296	KYQ88683, KYR01737, KYR02547	EGG22698	EFA78907
OG0000813	EAL69586	EGC31146, EGC39862	KYR02451	EGG13976	EFA85414, EFA85622
OG0000814	EAL69577	EGC34490	KYQ89015, KYQ89016, KYQ89017	EGG23804	EFA84971
OG0000815	EAL69338		KYQ90700	EGG24373, EGG24389, EGG24390, EGG24391	EFA77079
OG0000816	EAL69371	EGC29332	KYR00825	EGG21245, EGG23355	EFA80166, EFA83949
OG0000817	EAL69219	EGC34044	KYR01734	EGG24829	EFA81461, EFA85109, EFA85110
OG0000818	EAL69006	EGC39274	KYR00620	EGG16881, EGG20532, EGG20553	EFA79371
OG0000819	EAL67705, EAL68997	EGC29404, EGC34017, EGC34650, EGC37840		EGG19975
OG0000820	EAL68923	EGC30155, EGC36863	KYR00715	EGG24300, EGG24301	EFA75125
OG0000821	EAL68710, EAL69057	EGC31714, EGC31725	KYQ91931	EGG24458	EFA74964
OG0000822	EAL68662	EGC39137	KYR02655	EGG19479, EGG19480	EFA85309, EFA85310
OG0000823	EAL63934, EAL68254	EGC35266, EGC37374	KYR00209	EGG22570	EFA83585
OG0000824	EAL68349	EGC37223	KYQ92071	EGG18580, EGG18736, EGG19241	EFA86351
OG0000825	EAL67021	EGC40116, EGC40117	KYQ96809	EGG23658, EGG23662	EFA85783
OG0000826	EAL67772	EGC39890	KYR02678	EGG16122	EFA81236, EFA82316, EFA82344
OG0000827	EAL67813	EGC35396	KYQ90985	EGG16452, EGG19602	EFA75034, EFA85657
OG0000828	EAL67583, EAL67584, EAL67585, EAL67586	EGC29769	KYR01633		EFA78461
OG0000829	EAL67616, EAS66882	EGC37409, EGC37410	KYQ90199		EFA86174, EFA86175
OG0000830	EAL67633	EGC37401	KYQ93750	EGG24046	EFA75216, EFA84953, EFA85623
OG0000831	EAL67546, EAL67547	EGC36888	KYR01582	EGG14555, EGG14556	EFA80837
OG0000832	EAL67038, EAL67443	EGC34040, EGC35759	KYR00656	EGG23483	EFA79380
OG0000833	EAL67454	EGC30338	KYR00696, KYR01922	EGG15265, EGG20143	EFA82098
OG0000834	EAL65401, EAL65402, EDR41075	EGC34728, EGC35757, EGC36112, EGC36906
OG0000835	EAL65380, EAL67317	EGC36131, EGC39798	KYQ89073	EGG16843	EFA79058
OG0000836	EAL67071, EAL67254	EGC28816	KYR00638	EGG23167	EFA78278, EFA82194
OG0000837	EAL67077	EGC37723	KYQ91679, KYR01881	EGG13818, EGG18535	EFA76881
OG0000838	EAL66998	EGC36592, EGC38478	KYQ91158	EGG15337, EGG17119	EFA77807
OG0000839	EAL66847	EGC32087, EGC36955	KYQ90074, KYQ91506	EGG24763	EFA78920
OG0000840	EAL66928	EGC32597, EGC36325, EGC40601	KYQ93180	EGG16659	EFA77675
OG0000841	EAL66942	EGC38746, EGC40391	KYR00799	EGG16745, EGG20721	EFA80926
OG0000842	EAL66739	EGC29160, EGC29161, EGC33630	KYR00460	EGG24677	EFA85029
OG0000843	EAL64039, EAL66571	EGC31472	KYR00240	EGG19689, EGG22093	EFA80764
OG0000844	EAL66627, EAL66628	EGC31583, EGC31584	KYQ90070	EGG19961	EFA77990
OG0000845	EAL66176, EDR41072	EGC28869, EGC31010	KYQ88944	EGG14150	EFA79484
OG0000846	EAL66534	EGC28870	KYQ96742	EGG22227	EFA76079, EFA77162, EFA84667
OG0000847	EAL66273, EAL66274	EGC35256, EGC35257	KYR02747	EGG21568	EFA86111
OG0000848	EAL66064	EGC28414, EGC32151, EGC32671	KYQ92245	EGG24106	EFA84123
OG0000849	EAL66066	EGC28755	KYQ89590	EGG17914, EGG22419, EGG24577, EGG25102
OG0000850	EAL66204	EGC28228, EGC28465	KYQ89573	EGG17874	EFA76628, EFA76629
OG0000851	EDR41067	EGC31377, EGC32515, EGC33836	KYQ88531	EGG14498	EFA79702
OG0000852	EAL65893	EGC32946	KYQ90621, KYQ92495	EGG16515, EGG19094	EFA82876
OG0000853	EAL65781	EGC35446	KYR00484	EGG14295, EGG14467	EFA84790, EFA84792
OG0000854	EAL65467, EAL65468	EGC30260, EGC38646	KYR01201	EGG17118	EFA76222
OG0000855	EAL65477	EGC40240, EGC40241, EGC40242, EGC40243, EGC40244, EGC40245
OG0000856	EAL65180, EAL65415	EGC32854	KYQ91536	EGG20183, EGG21794	EFA85555
OG0000857	EAL65230	EGC31876, EGC38841	KYQ94163	EGG17827, EGG17832	EFA83971
OG0000858	EAL65190, EAL65191	EGC38563, EGC39583, EGC39584, EGC39585			EFA85151
OG0000859	EAL65024, EAL65025, EAL65068	EGC33576	KYQ93918	EGG15061	EFA76796
OG0000860	EAL64991	EGC35335	KYR03084	EGG19704	EFA77324, EFA80177, EFA80953
OG0000861	EAL64976, EAL64977	EGC37097, EGC37099	KYQ92801	EGG14315	EFA75905
OG0000862	EAL64848	EGC36769, EGC36770	KYQ96746	EGG23033, EGG25047	EFA80275
OG0000863	EAL64795	EGC31666, EGC35878	KYR02718	EGG23645	EFA75092, EFA80704
OG0000864	EAL64757	EGC38842	KYQ94258, KYQ99697	EGG22461	EFA76643, EFA81050
OG0000865	EAL64557	EGC30288	KYQ89201, KYQ89202	EGG19407	EFA78406, EFA78407
OG0000866	EAL64708	EGC33663	KYQ93853, KYQ94292, KYR01330	EGG21141	EFA74828
OG0000867	EAL64633	EGC34120	KYQ88982, KYQ90673	EGG19803, EGG20194	EFA80120
OG0000868	EAL64346	EGC33457, EGC37848	KYR00519	EGG23386	EFA75813, EFA80513
OG0000869	EAL64203	EGC33784	KYQ89667	EGG13881, EGG13882	EFA81692, EFA81693
OG0000870	EAL64181	EGC30810, EGC37303	KYQ93370	EGG16714, EGG17760	EFA77634
OG0000871	EAL64171	EGC30646, EGC30647, EGC36478	KYR01448	EGG19233	EFA81297
OG0000872	EAL64003	EGC32029	KYQ89727	EGG24874	EFA77252, EFA80510, EFA81830
OG0000873	EAL63981	EGC31290	KYQ89976, KYQ93765	EGG16742, EGG23310	EFA81952
OG0000874	EAL63940	EGC35264	KYQ89411, KYQ89562, KYQ91644	EGG19434	EFA76189
OG0000875		EGC31956	KYQ93269, KYQ93270, KYQ93682	EGG15260, EGG15282	EFA84305
OG0000876				EGG14854, EGG14855, EGG15506, EGG15508, EGG18551, EGG18552, EGG18553
OG0000877			KYQ93230, KYQ96819, KYR02546	EGG15647, EGG19723, EGG22407	EFA77426
OG0000878				EGG15728, EGG17182, EGG18022, EGG18073, EGG19386, EGG21454	EFA80904
OG0000879				EGG16873, EGG22812, EGG24141, EGG24142, EGG24254, EGG24257, EGG24258
OG0000880				EGG24164	EFA75661, EFA77156, EFA78783, EFA78785, EFA83516, EFA85530
OG0000881				EGG17228, EGG20111, EGG20112, EGG20220, EGG20685, EGG24363, EGG24365
OG0000882			KYQ90448	EGG14042, EGG17746, EGG17747, EGG17748, EGG17749, EGG19860
OG0000883				EGG13364, EGG21913, EGG22006, EGG22214, EGG22219, EGG22342, EGG22343
OG0000884				EGG13635, EGG18335, EGG18337, EGG19192, EGG19800, EGG19801, EGG22625
OG0000885			KYQ89506, KYQ90969, KYQ91675, KYQ91845, KYQ92701, KYQ93722	EGG18574
OG0000886				EGG18074, EGG18075, EGG19119, EGG19337, EGG19753, EGG20403, EGG21690
OG0000887				EGG22770	EFA77254, EFA80420, EFA80819, EFA80820, EFA82941, EFA85009
OG0000888			KYR02465, KYR02466	EGG20704	EFA79242, EFA79684, EFA82355, EFA84131
OG0000889			KYR03024, KYR03025, KYR03026, KYR03030, KYR03031, KYR03033	EGG21747
OG0000890			KYQ89648, KYQ89649, KYQ89794, KYQ89826, KYR02139, KYR02384, KYR02385
OG0000891			KYQ93213, KYQ93267, KYR02565		EFA82720, EFA82721, EFA83113, EFA83123
OG0000892			KYQ90200, KYQ93829, KYQ93830, KYQ93831, KYQ93832, KYQ93833, KYQ93834
OG0000893		EGC30559, EGC30961, EGC33402, EGC35841, EGC36235, EGC36558, EGC36565
OG0000894					EFA77508, EFA79347, EFA79610, EFA79746, EFA79941, EFA81001, EFA83371
OG0000895	EAS66897	EGC37379	KYR01040	EGG22486	EFA81710, EFA82512
OG0000896	EAL60295	EGC34823	KYQ91034	EGG16552	EFA78563, EFA83980
OG0000897	EAL62441, EAL63809, EAL63975, EAL63985, EAL63986		KYQ88924
OG0000898	EAL63821, EAL67258	EGC38379	KYQ89995	EGG14741	EFA82453
OG0000899	EAL63721	EGC36460	KYQ99775	EGG14665	EFA79256, EFA83414
OG0000900	EAL63725	EGC36444	KYQ91377	EGG13871, EGG14472	EFA75197
OG0000901	EAL63729, EAL69985	EGC35065	KYQ92371	EGG16566	EFA80258
OG0000902	EAL63716	EGC38675	KYR00829, KYR01229	EGG19041	EFA85339
OG0000903	EAL63787	EGC38676	KYQ91378	EGG14193	EFA75688, EFA83091
OG0000904	EAL63739	EGC36266	KYQ91749	EGG14397, EGG17203	EFA81345
OG0000905	EAL63742		KYQ91380, KYQ91734	EGG17784	EFA78237, EFA86800
OG0000906	EAL63679	EGC30592, EGC36472	KYQ91862	EGG13466	EFA82685
OG0000907	EAL63505	EGC36280	KYR02712	EGG23970	EFA76484, EFA84659
OG0000908	EAL63513	EGC38378	KYR00190	EGG22490	EFA75608, EFA79923
OG0000909	EAL63533	EGC33312, EGC33313	KYQ90620	EGG22644	EFA85277
OG0000910	EAL63391, EAL63546	EGC38295	KYQ88322	EGG13731	EFA81155
OG0000911	EAL63572	EGC36500		EGG21700	EFA75480, EFA79355, EFA80402
OG0000912	EAL63428, EDR41099	EGC35517	KYQ92003	EGG24333	EFA81708
OG0000913	EAL62760, EAL63442	EGC32335, EGC34310, EGC39057	KYQ91776
OG0000914	EAL63385	EGC36010	KYQ91438	EGG17152	EFA79360, EFA80506
OG0000915	EAL63389	EGC36258	KYR01402	EGG21355	EFA77935, EFA77949
OG0000916	EAL62406, EAL63395	EGC37271	KYQ99817	EGG17098	EFA85969
OG0000917	EAL63324	EGC38294	KYQ90420	EGG20231, EGG20299	EFA84830
OG0000918	EAL63333	EGC37252	KYR02408	EGG20645	EFA81070, EFA81071
OG0000919	EAL63238	EGC34009, EGC38787	KYQ90408	EGG22565	EFA86746
OG0000920	EAL63239, EAL67875	EGC29837	KYQ89416	EGG18647	EFA77327
OG0000921	EAL63240	EGC30235	KYQ91486, KYQ92786	EGG16115	EFA76505
OG0000922	EAL63181, EAL68032	EGC35548	KYQ92227	EGG17519	EFA82136
OG0000923	EAL63176	EGC31688	KYQ89135	EGG22874, EGG23040	EFA79410
OG0000924	EAL63134, EAL70407, EAL70938	EGC32412, EGC32418	KYQ94136
OG0000925	EAL63078	EGC30343	KYR02067	EGG14143	EFA76602, EFA77143
OG0000926	EAL63080	EGC36092, EGC40543	KYQ92742	EGG14335	EFA76546
OG0000927	EAL67898, EAS66837	EGC33450, EGC39689	KYQ89379, KYR01276
OG0000928	EAL63015	EGC28299, EGC37546	KYQ90998	EGG22687	EFA84113
OG0000929	EAL63034	EGC30727	KYQ89887, KYQ89894	EGG13925	EFA82728
OG0000930	EAL62956	EGC28658, EGC31056	KYQ92420	EGG15435	EFA76494
OG0000931	EAL62960	EGC28656	KYQ92400, KYQ92446	EGG13640	EFA79473
OG0000932	EAL62955	EGC36784, EGC36785	KYQ91045	EGG15431	EFA76491
OG0000933	EAL62949	EGC31856, EGC31979	KYQ91627	EGG13300	EFA82488
OG0000934	EAL62951	EGC31844, EGC31845	KYQ91623	EGG13304	EFA83245
OG0000935	EAL62910	EGC29304	KYQ90348, KYR00032	EGG19332	EFA75049
OG0000936	EAL62823	EGC33181	KYQ93107	EGG14497, EGG22668	EFA79491
OG0000937	EAL62820	EGC29886, EGC37936	KYQ88486	EGG21517	EFA83987
OG0000938	EAL62809		KYQ90489, KYQ92589	EGG19904, EGG20575	EFA81056
OG0000939	EAL62761	EGC39084	KYQ88234	EGG13672, EGG16708	EFA79319
OG0000940	EAL62726	EGC32485, EGC32486	KYQ92839	EGG18926	EFA82490
OG0000941	EAL62723, EAL62747	EGC36798	KYQ91651	EGG13320	EFA81736
OG0000942	EAL62710	EGC30945	KYQ89049, KYR01265	EGG16121	EFA81675
OG0000943	EAL62688	EGC36292	KYQ89831, KYQ89882	EGG13488	EFA84534
OG0000944	EAL62690	EGC36311	KYR02302	EGG14400, EGG17419	EFA76744
OG0000945	EAL62621	EGC32267	KYR01254	EGG14666	EFA80556, EFA80591
OG0000946	EAL62625	EGC32273	KYR00449	EGG16205	EFA84604, EFA86099
OG0000947	EAL62467	EGC28975, EGC40595	KYR01378	EGG24502	EFA85141
OG0000948	EAL62410	EGC30821	KYQ94257	EGG21183, EGG21201	EFA86466
OG0000949	EAL62422	EGC33878, EGC36643	KYQ99774	EGG15828	EFA83836
OG0000950	EAL62401	EGC36064	KYQ92650	EGG20045	EFA75804, EFA78916
OG0000951	EAL62379	EGC36059	KYR00771	EGG18471, EGG18472	EFA85234
OG0000952	EAL61978, EAS66830	EGC33722, EGC33725, EGC35696	KYQ90953
OG0000953	EAL62328	EGC36039	KYQ93788	EGG15241, EGG15780	EFA76343
OG0000954	EAL62302	EGC37995	KYQ90133, KYQ90134	EGG19967	EFA84281
OG0000955	EAL62293	EGC33182, EGC39256	KYQ90377	EGG21416	EFA82993
OG0000956	EAL61359, EAL62240	EGC31051, EGC36574	KYR01461	EGG16409
OG0000957	EAL62227, EAL72710	EGC34751, EGC36015, EGC38341		EGG13829
OG0000958	EAL62104	EGC30656, EGC34399	KYQ91822	EGG18450	EFA82516
OG0000959	EAL62106	EGC34400, EGC38382	KYR03022	EGG20209	EFA85097
OG0000960	EAL62107	EGC38518	KYQ89762, KYQ89766	EGG24396	EFA82582
OG0000961	EAL62112	EGC32768	KYQ90398	EGG22064	EFA81124, EFA83463
OG0000962	EAL62095, EAL63999	EGC29007	KYQ91741	EGG14059	EFA81862
OG0000963	EAL71630, EDR41034	EGC38564	KYQ89249	EGG19404	EFA78337
OG0000964	EAL62024	EGC38520	KYQ89853	EGG23569	EFA81202, EFA83681
OG0000965	EAL61565, EAL62025	EGC38506	KYQ93403	EGG23453	EFA79952
OG0000966	EAL62046	EGC36155	KYQ91737, KYQ92081	EGG14015	EFA86493
OG0000967	EAL61859, EAL61956	EGC28945	KYR01766	EGG18748	EFA79890
OG0000968	EAL61910, EAL65443, EAL65444	EGC29696	KYQ89819, KYQ89822
OG0000969	EAL61923	EGC38912	KYQ90592	EGG18975	EFA74637, EFA74638
OG0000970	EAL61883	EGC28364	KYQ90113, KYQ94318	EGG21482	EFA86585
OG0000971	EAL61867, EAL69453	EGC38898	KYQ89035	EGG13366	EFA84920
OG0000972	EAL61597, EAL61840	EGC31696	KYQ88673	EGG18372	EFA80265
OG0000973	EAL73583	EGC29532, EGC38431	KYQ96853	EGG23590	EFA82448
OG0000974	EAL73231	EGC30034	KYQ89600, KYQ91957	EGG16651	EFA82963
OG0000975	EAL73239	EGC31829	KYQ91830	EGG20402, EGG22742	EFA86702
OG0000976	EAL73252, EAL73253	EGC35133	KYQ92069	EGG15198	EFA81046
OG0000977	EAL73254	EGC30029	KYR01438	EGG20802, EGG23353	EFA74821
OG0000978	EAL64321, EAL73257	EGC29903, EGC32236, EGC38899, EGC38966
OG0000979	EAL73274	EGC39991	KYR01350	EGG14381	EFA84310, EFA84357
OG0000980	EAL73276	EGC29402	KYR00253	EGG16977	EFA77359, EFA81485
OG0000981	EAL73302	EGC39208	KYQ91759	EGG20525	EFA80070, EFA81306
OG0000982	EAL73712	EGC28370	KYQ92576	EGG22477	EFA74810, EFA79247
OG0000983	EAL73175, EAL73176	EGC29849	KYQ89227	EGG16645	EFA80957
OG0000984	EAL73345	EGC30066, EGC30670	KYQ90438	EGG24741	EFA75283
OG0000985	EAL73370	EGC32825, EGC35259	KYR02628	EGG13335	EFA83101
OG0000986	EEU04159	EGC36861		EGG20234	EFA76966, EFA76971, EFA85118
OG0000987	EAL73405	EGC32444	KYR00948, KYR02271	EGG20975	EFA80890
OG0000988	EAL70491, EAL70848, EAL73191	EGC35485, EGC38143	KYR01050
OG0000989	EAL66590, EAL73726	EGC28384	KYQ99762	EGG24495	EFA81812
OG0000990	EAL73651	EGC31315	KYQ94126	EGG15047, EGG15048	EFA78998
OG0000991	EAL73424	EGC31812	KYQ89324	EGG18017, EGG25411	EFA80382
OG0000992	EAL73179	EGC40010	KYR00252	EGG18015, EGG25409	EFA84224
OG0000993	EAL73448	EGC40011	KYQ88799	EGG14673	EFA80131, EFA84919
OG0000994	EAL73450	EGC40013	KYQ88615	EGG23761	EFA74686, EFA85864
OG0000995	EAL73155, EAL73172	EGC40014, EGC40017	KYR00251	EGG22745
OG0000996	EAL73152	EGC31811	KYR00249, KYR00250	EGG18377	EFA80384
OG0000997	EAL73456	EGC33661, EGC36953	KYQ92720	EGG22369	EFA83977
OG0000998	EAL73490	EGC39550, EGC39551	KYR01399	EGG21288	EFA84847
OG0000999	EAL73523	EGC39241	KYQ89090	EGG20499, EGG20717	EFA81032
OG0001000	EAL73676	EGC35742	KYQ92394	EGG15505, EGG19697	EFA82597
OG0001001	EAL73684	EGC34432	KYR02398	EGG23556	EFA84866, EFA84867
OG0001002	EAL61043, EAL73556	EGC29524	KYQ92553, KYR02988		EFA84529
OG0001003	EAL73050	EGC34729		EGG15481, EGG15482, EGG15484, EGG15485
OG0001004	EAL72942	EGC30621, EGC32102	KYR01575	EGG17458	EFA80976
OG0001005	EAL73094, EAL73095, EAL73122	EGC30608, EGC36697, EGC38024
OG0001006	EAL73072	EGC34803, EGC34804	KYR02335	EGG23596	EFA81642
OG0001007	EAL73083	EGC31410	KYQ91389	EGG23425	EFA80073, EFA85620
OG0001008	EAL73088, EAL73089	EGC34795	KYQ91074	EGG14277	EFA78169
OG0001009	EAL73019	EGC37632	KYQ89240	EGG16789, EGG24540	EFA79421
OG0001010	EAL73024	EGC31781	KYR02231	EGG14317, EGG19000	EFA79154
OG0001011	EAL72059, EAL73031	EGC28974	KYQ88987	EGG19922	EFA80144
OG0001012	EAL73035	EGC37631	KYQ89238, KYQ89390, KYQ89391		EFA83778
OG0001013	EAL71986, EAL72074	EGC38993	KYQ89460	EGG21420	EFA83838
OG0001014	EAL72013	EGC35174	KYR00571	EGG22379, EGG22425	EFA82691
OG0001015	EAL72391, EAL72395, EAL72396, EAL72606	EGC33005, EGC38648
OG0001016	EAL72093	EGC30504	KYQ88898, KYQ93572	EGG20002	EFA80817
OG0001017	EAL72109, EAL72110, EAL72792	EGC34870	KYQ88553	EGG23934
OG0001018	EDR41110, EDR41111	EGC32206, EGC33365	KYR02204		EFA84429
OG0001019	EAL72164	EGC38253	KYQ94184	EGG23961, EGG23962	EFA76230
OG0001020	EAL72177, EAL72178	EGC33692, EGC33696, EGC35712, EGC35713
OG0001021	EAL72765	EGC30616, EGC32099	KYQ91062	EGG21385	EFA77024
OG0001022	EAL64876, EAL72227	EGC33656	KYQ92375	EGG14115	EFA83357
OG0001023	EAL71912	EGC34799	KYQ91184	EGG21610	EFA75513, EFA83461
OG0001024	EAL72232	EGC31795	KYQ92747	EGG21678	EFA79705, EFA80655
OG0001025	EAL72233, EAL72821	EGC31788	KYR02272	EGG21675	EFA75881
OG0001026	EAL72244, EEU04148	EGC31674	KYQ89145	EGG22507	EFA78624
OG0001027	EAL72824	EGC30328	KYQ89144	EGG15572, EGG15577	EFA78629
OG0001028	EAL72245	EGC30327	KYQ89141	EGG14422	EFA78630, EFA85346
OG0001029	EAL72271	EGC34141	KYR00818	EGG15497	EFA83492, EFA86128
OG0001030	EAL60882, EAL71977	EGC36397	KYR00310	EGG24063	EFA83136
OG0001031	EAL72282	EGC32611	KYQ99752	EGG25154	EFA77793, EFA83196
OG0001032	EAL72309, EAL72694	EGC38968	KYQ96800	EGG21368	EFA80966
OG0001033	EAL72336	EGC33089	KYQ96795	EGG15852, EGG15853	EFA75356
OG0001034	EAL72338, EAL72545	EGC40409	KYQ88547	EGG14000	EFA84756
OG0001035	EAL72416, EAL72417	EGC39026	KYQ94236	EGG21240	EFA84798
OG0001036	EAL70235, EAL72466	EGC32992, EGC32993, EGC32994	KYR01484
OG0001037	EAL72481	EGC28703	KYQ90164	EGG24521	EFA84860, EFA85291
OG0001038	EAL72482	EGC28705	KYR00174	EGG14684, EGG22579	EFA81784
OG0001039	EAL72522	EGC32608	KYR02511	EGG17659, EGG20693	EFA77118
OG0001040	EAL70214, EAL71902	EGC40081	KYR00213	EGG23265	EFA83917
OG0001041	EAL71950	EGC33536	KYR02538	EGG16757, EGG16758	EFA77386
OG0001042	EAL72553	EGC34572	KYQ91469	EGG19338, EGG20404	EFA74527
OG0001043	EAL72556	EGC34581	KYR02507	EGG16178, EGG16887	EFA86337
OG0001044	EAL72557	EGC29086	KYQ99877, KYR02508	EGG23539	EFA82024
OG0001045	EAL61646	EGC28890	KYR02957	EGG13618	EFA79121, EFA79123
OG0001046	EAL61680	EGC33138	KYQ90087	EGG25303	EFA76618, EFA76652
OG0001047	EDR41025	EGC33145, EGC33146	KYR00976	EGG25302	EFA76654
OG0001048	EAL61701	EGC29604	KYR00125	EGG25306	EFA76633, EFA77013
OG0001049	EAL61740	EGC33602	KYQ89406	EGG13800, EGG13801	EFA76526
OG0001050	EAL61756	EGC29349, EGC29350	KYR00963	EGG23258	EFA78267
OG0001051	EAL61573	EGC34000	KYQ88932, KYQ90773, KYR01847	EGG23889
OG0001052	EAL61526	EGC35490	KYQ88326	EGG16417, EGG19821	EFA83149
OG0001053	EAL61533, EAL65834, EAL67786	EGC33993, EGC35074		EGG16389
OG0001054	EAL64970, EEU04047	EGC35327	KYQ88403	EGG14299	EFA75893
OG0001055	EAL61473, EAL61474		KYQ92460	EGG14316, EGG14318	EFA74851
OG0001056	EAL61482	EGC28445, EGC36361	KYR00920	EGG22090	EFA83314
OG0001057	EAL61341, EAL68089	EGC32538	KYQ96961	EGG19947	EFA76816
OG0001058	EAL61385, EAL68522	EGC37563		EGG20784	EFA78568, EFA80665
OG0001059	EAL61268, EAL68700	EGC29322, EGC33191, EGC33192			EFA83743
OG0001060	EAL61182	EGC30626, EGC31637, EGC39370	KYR03006	EGG25205
OG0001061	EAL61199	EGC31394, EGC31397	KYQ93903	EGG17196	EFA81541
OG0001062	EAL61233	EGC29743, EGC29744	KYQ92527	EGG16291	EFA82236
OG0001063	EEU04041	EGC34775	KYR02183, KYR02184	EGG15166, EGG19856
OG0001064	EEU04044	EGC30392, EGC30393	KYQ92526	EGG13258	EFA82237
OG0001065	EDR41010	EGC30383, EGC39067	KYQ92468	EGG25239	EFA85717
OG0001066	EAL61089, EAS66928	EGC38479	KYR00778	EGG22347	EFA78614
OG0001067	EAL61162, EAL68436	EGC39630	KYR00992	EGG17488	EFA77298
OG0001068	EAL61151	EGC40216	KYQ92403	EGG19631	EFA79376, EFA80686
OG0001069	EAL61042	EGC39488	KYR02620	EGG20224, EGG20225	EFA76311
OG0001070	EAL61047	EGC39491	KYR02808	EGG21959, EGG24465	EFA82956
OG0001071	EAL61074, EAL61075	EGC33896	KYQ99799	EGG15259	EFA81650
OG0001072	EAL60956, EAL68560	EGC33888	KYQ92533	EGG19253	EFA79104
OG0001073	EAL60957	EGC39944	KYQ93522	EGG21291	EFA75528, EFA82698
OG0001074	EAL60988	EGC39911	KYQ92780	EGG15006, EGG23227	EFA84005
OG0001075	EAL60993	EGC29741	KYR00309	EGG15510	EFA76977, EFA80561
OG0001076	EAL61039	EGC28867, EGC31001	KYR01498	EGG20982	EFA85221
OG0001077	EAL61009	EGC35641	KYQ93475	EGG17220	EFA76878, EFA86286
OG0001078	EAL60859	EGC33895	KYQ94303	EGG15097, EGG23794	EFA77060
OG0001079	EAL60883	EGC36396	KYQ90140	EGG16872	EFA75852, EFA79561
OG0001080	EAL60891	EGC31266	KYQ90986	EGG14142	EFA82016, EFA83969
OG0001081	EAL60793, EAL60832	EGC31432	KYR02602	EGG14650	EFA75296
OG0001082	EAL60739, EAL60758	EGC38756	KYQ91150	EGG23664	EFA78538
OG0001083	EAL60722	EGC31804, EGC38723	KYR03066	EGG21061	EFA78856
OG0001084	EAL60615	EGC34131	KYQ93182	EGG23115	EFA76292, EFA81917
OG0001085	EAL60617, EAL65620	EGC35822	KYR01427	EGG21903	EFA76425
OG0001086	EAL60562, EDR41009	EGC31737	KYQ93108	EGG20417	EFA85169
OG0001087	EAL60520	EGC37049	KYQ91766, KYR00873	EGG18370	EFA77317
OG0001088	EAL60337	EGC29602, EGC37624	KYQ91431	EGG19520	EFA74535
OG0001089	EAL71893	EGC29230	KYQ92399, KYQ92445	EGG23940	EFA75188
OG0001090	EAL71897	EGC29229	KYR00445	EGG17079	EFA81725, EFA81727
OG0001091	EAL71816	EGC39971	KYQ90115	EGG14214, EGG14215	EFA76917
OG0001092	EAL71764	EGC37188	KYR01366	EGG21532	EFA85320, EFA85466
OG0001093	EAL71702	EGC38528	KYR01999	EGG17485, EGG24561	EFA78842
OG0001094	EAL71747, EAL71749, EAL71870, EAL71871		KYQ93447		EFA81593
OG0001095	EAL67735, EAL71844	EGC36725	KYQ92013	EGG23262	EFA84817
OG0001096	EAL71875	EGC38562	KYR02177	EGG17428, EGG17902	EFA81506
OG0001097	EAL71679	EGC30309	KYQ89139	EGG15792, EGG21606	EFA75004
OG0001098	EAL70595, EAL70763, EAL71526	EGC31000, EGC31009			EFA84409
OG0001099	EAL71555	EGC35488	KYR03146	EGG18194, EGG18195	EFA86198
OG0001100	EAL71505	EGC29551	KYQ89971	EGG19987	EFA77197, EFA79697
OG0001101	EAL71478		KYQ90174, KYQ93324, KYR01714, KYR02035, KYR02036
OG0001102	EAL71451	EGC33644, EGC33645	KYR01355	EGG17823	EFA79706
OG0001103	EAL71428	EGC33333	KYQ99653	EGG14933, EGG20035	EFA84134
OG0001104	EAL71466	EGC29729	KYQ99657	EGG20037, EGG20038	EFA84127
OG0001105	EAL70227, EAL71440	EGC28573	KYQ89717	EGG24156	EFA81828
OG0001106	EDR41103	EGC36370, EGC38427	KYQ92342	EGG13309	EFA80232
OG0001107	EAL71311	EGC30108	KYQ91985	EGG14258, EGG20149	EFA85470
OG0001108	EAL71372	EGC30819, EGC40452	KYQ91769	EGG20915	EFA77786
OG0001109	EAL71209	EGC33329	KYQ92624, KYQ92625	EGG22185	EFA85535
OG0001110	EAL71327	EGC28677	KYR00326, KYR02009	EGG24100	EFA86401
OG0001111	EAL69038, EAL70453, EAL71078, EAL71107	EGC31660	KYR00078
OG0001112	EAL70985	EGC39662	KYQ94481	EGG14260, EGG14261	EFA85701
OG0001113	EAS66955	EGC38571	KYQ92662	EGG15719, EGG22198	EFA82336
OG0001114	EAL71068	EGC28682, EGC28683	KYR02163	EGG13863	EFA82987
OG0001115	EAS66959	EGC34424	KYR00459	EGG17869	EFA75165, EFA75166
OG0001116	EAS66962	EGC36577	KYQ90816	EGG13599	EFA75541, EFA80390
OG0001117	EAL71025	EGC28791, EGC34271	KYR00221	EGG23458	EFA82826
OG0001118	EAL71030	EGC34254	KYR00215	EGG24883	EFA78312, EFA78313
OG0001119	EAL68916, EAL71056	EGC34648	KYQ90111	EGG25291	EFA75486
OG0001120	EAL71006	EGC32708	KYQ91767, KYR01073	EGG19258	EFA83639
OG0001121	EAL70481, EAL71033	EGC38469	KYR00280	EGG21210	EFA83276
OG0001122	EAL70480, EAL70949	EGC38442	KYR00292	EGG21217	EFA83277
OG0001123	EAL70475, EAL70952	EGC39755	KYQ96899	EGG17939	EFA81011
OG0001124	EAL70471, EAL71164	EGC29545	KYQ90362	EGG23672	EFA82116
OG0001125	EAL70470, EAL71151	EGC31756	KYR00297	EGG22212	EFA77867
OG0001126	EAL70467, EAL70956	EGC28582	KYR01394	EGG18349	EFA86849
OG0001127	EAL70447, EAL70943	EGC33193	KYQ92054	EGG17744	EFA84674
OG0001128	EAL70446, EAL70944	EGC33205	KYQ91022	EGG17690	EFA79431
OG0001129	EAL70443, EAL70946	EGC33195	KYQ92059	EGG21251	EFA74726
OG0001130	EAL70442, EAL71157	EGC28765	KYR00887	EGG17556	EFA79251
OG0001131	EAL70441, EAL71079	EGC28764	KYR00898	EGG17585	EFA76453
OG0001132	EAL70435, EAL70926	EGC28540	KYQ91397	EGG21253	EFA74723
OG0001133	EAL70432, EAL71158	EGC30704	KYQ91103	EGG19445	EFA84444
OG0001134	EAL70429, EAL70430, EAL70928, EAL70929	EGC34958, EGC38483
OG0001135	EAL70423, EAL70919	EGC33281	KYQ90221	EGG24757	EFA79220
OG0001136	EAL70422, EAL70932	EGC33293	KYQ90220	EGG24756	EFA79221
OG0001137	EAL70409, EAL70937	EGC38473	KYR01677	EGG24798	EFA85390
OG0001138	EAL70408, EAL71041	EGC31803	KYR00294	EGG13932	EFA81619
OG0001139	EAL70397, EAL70925	EGC31810	KYR03105	EGG15437	EFA85675
OG0001140	EAL70645, EAL70799	EGC38450	KYR02924	EGG13628	EFA85542
OG0001141	EAL70644, EAL70800	EGC38474	KYR01708	EGG24800	EFA85543
OG0001142	EAL70623, EAL70778	EGC30459	KYQ89229	EGG19318	EFA84076
OG0001143	EAL70622, EAL70777	EGC30458	KYQ93742	EGG19393	EFA84053
OG0001144	EAL70612, EAL70854	EGC28541	KYQ90948	EGG17264	EFA74737
OG0001145	EAL70610, EAL70771	EGC38432	KYQ90949	EGG17262	EFA74736
OG0001146	EAL70609, EAL70770	EGC38433	KYQ88446	EGG19470	EFA78019
OG0001147	EAL70606, EAL70768	EGC28653	KYQ90219	EGG22181	EFA78598
OG0001148	EAL70604, EAL70857	EGC33162	KYQ91204		EFA74713, EFA82313
OG0001149	EAL70599, EAL70766	EGC28761	KYR00888	EGG17584	EFA76454
OG0001150	EAL70597, EAL70764	EGC31759	KYR00890	EGG17581	EFA76458
OG0001151	EAL70592, EAL70762	EGC35516	KYQ92645	EGG18463	EFA79855
OG0001152	EAL70588, EAL70860	EGC37926	KYR00688	EGG25184	EFA78160
OG0001153	EAL70586, EAL70760	EGC34091	KYQ89033	EGG22650	EFA83361
OG0001154	EAL70580, EAL70864	EGC33607	KYQ89374	EGG13547	EFA84643
OG0001155	EAL70579, EAL70889	EGC33290	KYQ89373	EGG20084	EFA84642
OG0001156	EAL70577, EAL70757	EGC33279	KYQ89371	EGG17162	EFA86384
OG0001157	EAL70574, EAL70756	EGC33187	KYR01676	EGG24804	EFA82211
OG0001158	EAL70563, EAL70812	EGC34086	KYR03063	EGG15448	EFA83755
OG0001159	EAL70562, EAL70813	EGC34096	KYR03043	EGG15447	EFA83754
OG0001160	EAL70560, EAL70814	EGC30107	KYR03045	EGG15446	EFA83753
OG0001161	EAL70559, EAL70747	EGC30909	KYQ89512	EGG23880	EFA80547
OG0001162	EAL70554, EAL70818	EGC38447	KYQ91232	EGG21769	EFA83107
OG0001163	EAL70553, EAL70819	EGC30910	KYR01359	EGG24708	EFA86149
OG0001164	EAL70552, EAL70820	EGC30914	KYR01360	EGG24809	EFA86150
OG0001165	EAL70551, EAL70821	EGC30913	KYR02112	EGG24930	EFA80614
OG0001166	EAL70529, EAL70834	EGC30712	KYQ92661	EGG14566	EFA76695
OG0001167	EAL70519, EAL70753	EGC28253	KYQ92045	EGG21170	EFA83304
OG0001168	EAL70516, EAL70841	EGC37910	KYR00178	EGG19789	EFA86184
OG0001169	EAL70514, EAL70907	EGC37890	KYQ88337	EGG23375	EFA83274
OG0001170	EAL70513, EAL70781	EGC37892	KYQ88338	EGG23373	EFA83272
OG0001171	EAL70510, EAL70783	EGC38470	KYR02029	EGG20206	EFA81744
OG0001172	EAL70506, EAL70909	EGC38444	KYR00066	EGG22807	EFA75899
OG0001173	EAL70503, EAL70785	EGC31364	KYR01790	EGG17633	EFA79550
OG0001174	EAL70501, EAL70875	EGC30703	KYQ91079	EGG17691	EFA85385
OG0001175	EAL70499, EAL70786	EGC37914	KYR01358	EGG17165	EFA79392
OG0001176	EAL70496, EAL70787	EGC35484	KYQ90974	EGG23414	EFA78915
OG0001177	EAL70495, EAL70788	EGC33284	KYR01675	EGG24803	EFA82212
OG0001178	EAL70489, EAL70791	EGC37917	KYR03067	EGG15449	EFA83740
OG0001179	EAL70488, EAL70792	EGC37901	KYQ88633	EGG22176	EFA79377
OG0001180	EAL70485, EAL70486, EAL70844, EAL70914	EGC35483		EGG23469
OG0001181	EEU04132, EEU04135	EGC29782	KYR01757	EGG22479	EFA85558
OG0001182	EAL70691, EAL70734	EGC31165	KYQ92028	EGG17750	EFA82898
OG0001183	EAL70660, EAL70732	EGC31162	KYQ90211	EGG17260	EFA84440
OG0001184	EAL70676, EAL70731	EGC31168	KYQ90210	EGG17261	EFA84441
OG0001185	EAL70663, EAL70728	EGC28511	KYQ90207	EGG14068	EFA77117
OG0001186	EAL70664, EAL70724	EGC29778	KYQ90203	EGG23511	EFA77142
OG0001187	EAL70696, EAL70723	EGC31164	KYQ99916	EGG19884	EFA77739
OG0001188	EAL70677, EAL70720	EGC31160	KYQ99908	EGG23797	EFA82228
OG0001189	EAL70665, EAL70719	EGC31163	KYQ99909	EGG23796	EFA86061
OG0001190	EAL70717, EEU04133	EGC33203	KYQ91449	EGG14661	EFA76909
OG0001191	EAL70667, EAL70716	EGC33189	KYQ91392	EGG21254	EFA82502
OG0001192	EAL70683, EAL70714	EGC29787	KYR02090	EGG14729	EFA75682
OG0001193	EAL70678, EAL70713	EGC29781	KYR01696	EGG20327	EFA85546
OG0001194	EAL70669, EAL70711	EGC29785	KYR01697	EGG24801	EFA85545
OG0001195	EAL70674, EAL70705	EGC33198	KYQ91466	EGG20742	EFA74743
OG0001196	EAL70070	EGC29539, EGC39377	KYQ90758	EGG13620	EFA76806
OG0001197	EAL70282	EGC29546, EGC39409	KYQ90757	EGG13621	EFA76805
OG0001198	EAL70182	EGC40083	KYQ92651	EGG17511, EGG23587	EFA84595
OG0001199	EAL67155, EAL70264	EGC33477	KYR02879	EGG19492	EFA77495
OG0001200	EAL67984, EAL70046	EGC31590	KYQ89968	EGG17131	EFA83698
OG0001201	EAL69860, EAL70027	EGC40025	KYQ90488	EGG19453	EFA76210
OG0001202	EAL70028	EGC29053, EGC32968, EGC33596	KYR01395, KYR02753
OG0001203	EAL70029	EGC40068	KYR02977, KYR02978	EGG14639	EFA76293
OG0001204	EAL70030	EGC40069	KYQ92816	EGG15854, EGG15855	EFA75214
OG0001205	EAL70195	EGC29568	KYQ90500	EGG22376	EFA76205, EFA80500
OG0001206	EAL70022	EGC40268, EGC40269	KYQ99751	EGG17644	EFA78435
OG0001207	EAL70169	EGC32065	KYQ90178	EGG20317	EFA79804, EFA79805
OG0001208	EAL70155	EGC39065	KYR01030	EGG17103	EFA80707, EFA81392
OG0001209	EAL70339	EGC35515	KYQ92550	EGG21831	EFA79822, EFA79823
OG0001210	EAL70128	EGC40028	KYQ92187	EGG18983	EFA82625, EFA86168
OG0001211	EAL70360, EAL70361	EGC35412	KYQ89889	EGG16076	EFA80254
OG0001212	EAL70104	EGC29089, EGC29090	KYR01799	EGG22149	EFA82674
OG0001213	EAL66199, EAL70103	EGC34232	KYQ93789	EGG14844	EFA78385
OG0001214	EAL65049, EAL69902, EDR41100	EGC36584		EGG23891	EFA74565
OG0001215	EAL70083	EGC37508, EGC37509	KYQ90356	EGG20764	EFA82981
OG0001216	EAL69843	EGC34261, EGC36508	KYQ94010, KYR01894		EFA84796
OG0001217	EAL69867	EGC40020	KYQ94396	EGG21447	EFA75708, EFA82017
OG0001218	EAL69838	EGC33064, EGC33066	KYR00502	EGG24583	EFA81038
OG0001219	EAL69864	EGC30866, EGC39999	KYR00530	EGG24738	EFA77913
OG0001220	EAL69882	EGC36078, EGC39986	KYR02218	EGG18712	EFA81716
OG0001221	EAL69815, EAL69819	EGC39988	KYR02223	EGG14543	EFA83876
OG0001222	EAL69914	EGC38331, EGC38332	KYR01786	EGG23405	EFA80219
OG0001223	EAL65566, EAL69859	EGC39768	KYQ94287	EGG24513	EFA82176
OG0001224	EAL69928	EGC36079	KYQ91750	EGG13291, EGG22574	EFA80212
OG0001225	EAL67622, EAL69794	EGC37430	KYR02716	EGG24349	EFA80489
OG0001226	EAL69870	EGC34793	KYR02996	EGG22670	EFA84868, EFA84902
OG0001227	EAL69763	EGC33339, EGC39264	KYR03034	EGG21854	EFA84938
OG0001228	EAL69772	EGC34607	KYR01846	EGG25173, EGG25174	EFA77673
OG0001229	EAL69597	EGC34780	KYQ88241, KYQ89129	EGG16273	EFA79323
OG0001230	EAL69547	EGC37276	KYR03174	EGG20995	EFA80751, EFA82669
OG0001231	EAL69598	EGC38578, EGC38733		EGG22161, EGG22162, EGG22163
OG0001232	EAL69599	EGC34773	KYR01761, KYR01762	EGG14232	EFA86386
OG0001233	EAL69588	EGC39859	KYQ92174	EGG21577	EFA78340, EFA79452
OG0001234	EAL69583	EGC31872, EGC36126	KYQ90726	EGG13807	EFA83617
OG0001235	EAL69268, EAL69686	EGC35956, EGC38128	KYQ94389, KYR01098
OG0001236	EAL69624	EGC34171	KYQ93095, KYQ93659	EGG15798	EFA84147
OG0001237	EAL69621	EGC28911	KYQ88436	EGG15861	EFA74533, EFA74534
OG0001238	EAL67551, EAL69563	EGC31035	KYQ90124	EGG23506	EFA78090
OG0001239	EAL69470	EGC29141	KYR01335	EGG15867, EGG15924, EGG18657
OG0001240	EAL69500, EAL69501	EGC38052	KYR02922	EGG13866	EFA80255
OG0001241	EAL69449	EGC29587, EGC31873	KYQ91268	EGG20284	EFA78472
OG0001242	EAL69368	EGC35318	KYQ91303	EGG13984	EFA80635, EFA80636
OG0001243	EAL69354	EGC36168, EGC37568, EGC39522	KYQ89672		EFA75357
OG0001244	EAL69376	EGC38020	KYQ91185	EGG18291, EGG18292	EFA80123
OG0001245	EAL69344, EAL69345	EGC32510	KYQ92909	EGG17569	EFA86726
OG0001246	EAL69332, EDR41097	EGC35351	KYQ91846	EGG21875	EFA77956
OG0001247	EAL69429	EGC28566	KYQ88470, KYR00986	EGG24148	EFA80167
OG0001248	EAL69237	EGC35350, EGC39195	KYQ88645	EGG23050	EFA86692
OG0001249	EAL69245	EGC37566	KYQ88449	EGG16022	EFA76111, EFA76112
OG0001250	EAL68951	EGC28358	KYQ99843	EGG13981	EFA77488, EFA79921
OG0001251	EAL69000	EGC28481	KYQ94334	EGG13575, EGG17752	EFA83437
OG0001252	EAL69023	EGC39479	KYQ89463, KYR01038	EGG22221	EFA80460
OG0001253	EAL68945	EGC30372	KYQ88648	EGG19570, EGG19571	EFA86696
OG0001254	EAL68900	EGC37562	KYR00695	EGG20785	EFA78561, EFA78562
OG0001255	EAL68902	EGC35355	KYQ91309	EGG23382	EFA81822, EFA84745
OG0001256	EAL68996	EGC28720, EGC29510	KYR00070	EGG23212	EFA74746
OG0001257	EAL68919	EGC31662	KYR00076, KYR00077	EGG14424	EFA82855
OG0001258	EAL68929	EGC35893	KYR00548	EGG23898	EFA77813, EFA77814
OG0001259	EAL68940	EGC28696	KYQ91883	EGG15308	EFA81547, EFA81915
OG0001260	EAL68784	EGC39293	KYQ93887, KYQ93888	EGG22504	EFA83212
OG0001261	EAL68860	EGC28719, EGC29509	KYQ88842	EGG22526	EFA84831
OG0001262	EAL68809	EGC32185, EGC32191	KYR00049	EGG15977	EFA76584
OG0001263	EAL68824	EGC30492, EGC33109	KYR00934	EGG23807	EFA85041
OG0001264	EAL68750				EFA77410, EFA77941, EFA81825, EFA82660, EFA85114
OG0001265	EAL68706, EAL68717	EGC30158	KYR00720	EGG22412	EFA78015
OG0001266	EAL68709	EGC31719, EGC31722	KYQ91904	EGG14104	EFA78246
OG0001267	EAL68718, EAS66903	EGC39138	KYR02657	EGG18481	EFA77109
OG0001268	EAL68713, EDR41094	EGC31726	KYQ99643	EGG17686	EFA74728
OG0001269	EAL68688	EGC36966	KYQ99649	EGG24709, EGG25398	EFA83373
OG0001270	EAL68690	EGC39069	KYR02868	EGG22387	EFA83013, EFA83923
OG0001271	EAL68649	EGC30043	KYQ88601	EGG25027, EGG25028	EFA79764
OG0001272	EAL68606	EGC28694	KYR00863	EGG22638, EGG23081	EFA84952
OG0001273	EAL68114	EGC34280	KYR02265, KYR02266	EGG21808	EFA86612
OG0001274	EAL68185	EGC37358	KYR02262	EGG25217	EFA81889, EFA86614
OG0001275	EAL68212, EAL68469	EGC40462	KYQ90396	EGG20780	EFA78775
OG0001276	EAL68111	EGC30160	KYQ90077	EGG16576, EGG22731	EFA84102
OG0001277	EAL68238, EAL68239, EAL68241, EAL68242	EGC37440, EGC37441
OG0001278	EAL68250	EGC37212	KYR02770	EGG24405, EGG24444	EFA76178
OG0001279	EAL68483	EGC37351	KYQ90932, KYQ93248	EGG17762	EFA75426
OG0001280	EAL68488	EGC30408	KYQ93704	EGG22908	EFA85943, EFA85944
OG0001281	EAL68278	EGC39751		EGG16743, EGG20642, EGG20643, EGG22386
OG0001282	EAL68293	EGC37355	KYR01041	EGG25231	EFA81092, EFA81501
OG0001283	EAL68348	EGC37205	KYQ94474, KYR02235	EGG23904	EFA82528
OG0001284	EAL68380	EGC33683, EGC33684	KYQ90681	EGG15764	EFA76615
OG0001285	EAL68428, EAL68429, EAL68430			EGG19756, EGG21638, EGG21639
OG0001286	EAL67981	EGC38183	KYQ91793	EGG16049	EFA78712, EFA78713
OG0001287	EAL67982	EGC39843	KYR00595	EGG25206	EFA77791, EFA77792
OG0001288	EAL64112, EAL67998	EGC36611, EGC37534	KYQ92314	EGG21155
OG0001289	EAL68027	EGC28308, EGC29498	KYQ91995	EGG14685	EFA76444
OG0001290	EAL67920, EAL67921	EGC37626	KYR01406, KYR01407		EFA75773
OG0001291	EAL67941	EGC28350, EGC29516	KYQ91837	EGG22542	EFA81601
OG0001292	EAL67885	EGC36135, EGC36136	KYQ90427	EGG20672	EFA75701
OG0001293	EAL67852	EGC28558	KYQ91456, KYQ92198	EGG16507	EFA81773
OG0001294	EAL67775, EDR41050	EGC39089	KYR00678	EGG21551	EFA78156
OG0001295	EAL67847	EGC39569	KYR00640	EGG15060, EGG23944	EFA80244
OG0001296	EAL67794	EGC37616, EGC39547	KYR00523	EGG14533	EFA84092
OG0001297	EAL67833	EGC37191, EGC37725	KYQ88211	EGG23176	EFA75723
OG0001298	EAL67655	EGC32300, EGC40464	KYQ90527	EGG16335	EFA84553
OG0001299	EAL67657	EGC39611	KYQ88228	EGG13698	EFA79876, EFA79877
OG0001300	EAL67661	EGC34560, EGC34561	KYQ91300	EGG23523	EFA86516
OG0001301	EAL67665	EGC38316	KYR00990	EGG14251, EGG22905	EFA85127
OG0001302	EAL67580	EGC29771, EGC33341	KYR01722	EGG13962	EFA78465
OG0001303	EAL67577	EGC31996	KYQ89164	EGG15502, EGG15537	EFA83169
OG0001304	EAL67603	EGC36862	KYQ89159	EGG15512	EFA76489, EFA84404
OG0001305	EAL67535	EGC36006, EGC36319	KYQ96663	EGG24409	EFA82814
OG0001306	EAL67539	EGC31479	KYR02617	EGG15059	EFA84106, EFA84158
OG0001307	EAL67479	EGC28304	KYQ92119	EGG24323	EFA80773, EFA82585
OG0001308	EAL67324	EGC37874	KYQ89715, KYR00611	EGG21850	EFA78298
OG0001309	EAL67352	EGC37720	KYQ92002	EGG14677, EGG21111	EFA76286
OG0001310	EAL65679, EAL67256	EGC38236	KYQ92843	EGG20382	EFA85823
OG0001311	EAL67373	EGC30569	KYR00398	EGG25392	EFA78653, EFA81752
OG0001312	EAL67184	EGC34603	KYQ91349	EGG15604, EGG24983	EFA75993
OG0001313	EAL67185		KYQ91366, KYQ99688	EGG20691	EFA74864, EFA83014
OG0001314	EAL67226, EAL67227	EGC30085	KYR00560	EGG15369	EFA81284
OG0001315	EAL67041	EGC29235, EGC31024	KYQ93802	EGG18958	EFA86342
OG0001316	EAL67058	EGC30449, EGC36598	KYQ91706	EGG18812	EFA76594
OG0001317	EAL66989	EGC28294	KYQ89431	EGG16451	EFA82806, EFA82807
OG0001318	EAL66794	EGC33687	KYR00773	EGG24123, EGG24132	EFA79095
OG0001319	EAL66879	EGC34660	KYQ88177	EGG18966, EGG19643	EFA82978
OG0001320	EAL66960	EGC28635	KYQ91960	EGG22606	EFA76122, EFA80270
OG0001321	EAL66907	EGC37124, EGC37125	KYQ93671	EGG23235	EFA79502
OG0001322	EAL66788	EGC34657	KYR00303	EGG20709	EFA79115, EFA86297
OG0001323	EAL66741	EGC30006	KYQ90616	EGG13519	EFA84456, EFA85847
OG0001324	EAL66718	EGC33070, EGC34882	KYQ93341	EGG16580	EFA76531
OG0001325	EAL66676, EAL66677	EGC30069	KYQ90617	EGG13520	EFA85848
OG0001326	EAL66555, EDR41071	EGC29720	KYQ93520	EGG18851	EFA77607
OG0001327	EAL66661	EGC38206	KYR02649	EGG20863, EGG20864	EFA80824
OG0001328	EAL66583	EGC34623, EGC34624	KYR01453	EGG24746	EFA82339
OG0001329	EAL66597, EAL66653	EGC35404	KYQ91724	EGG16711	EFA86274
OG0001330	EAL66601	EGC40237	KYQ89579, KYQ89969	EGG23187	EFA77316
OG0001331	EAL66629		KYQ93847	EGG13548, EGG15020, EGG21878	EFA86572
OG0001332	EAL66658	EGC33263, EGC39278	KYR03112	EGG14510	EFA76582
OG0001333	EAL66459	EGC40260	KYQ88166	EGG13349, EGG21158	EFA83330
OG0001334	EEU04097, EEU04098	EGC37420	KYQ94248	EGG16635	EFA86421
OG0001335	EAL66442	EGC29765, EGC39422	KYQ99901	EGG20805	EFA85142
OG0001336	EEU04100	EGC28754	KYQ93332	EGG16932	EFA76529, EFA76530
OG0001337	EAL66382	EGC28732, EGC35605	KYQ93612	EGG17964	EFA76282
OG0001338	EAL66310	EGC31613	KYQ91296	EGG24974	EFA75947, EFA77548
OG0001339	EAS66865	EGC35255		EGG18329, EGG23350	EFA86104, EFA86855
OG0001340	EAL66096	EGC28355	KYQ88165	EGG13348, EGG21157	EFA83329
OG0001341	EAL66242	EGC31438	KYQ88164	EGG13345, EGG21156	EFA83328
OG0001342	EAL66163	EGC32326	KYQ89067, KYQ99747	EGG17244	EFA79496
OG0001343	EAL66045	EGC37012	KYQ90233	EGG23179, EGG23180	EFA84468
OG0001344	EAL66223	EGC29856	KYQ88596	EGG20332	EFA81328, EFA84678
OG0001345	EAL66229	EGC40206	KYQ90606	EGG21635	EFA76313, EFA81245
OG0001346	EAL66232	EGC29239	KYQ99810	EGG19395	EFA78496, EFA84079
OG0001347	EAL66003	EGC39375	KYQ93937, KYR00787	EGG22633	EFA82208
OG0001348	EAL65909	EGC35436	KYQ93456, KYQ93460	EGG14197	EFA86366
OG0001349	EAL65970	EGC38625, EGC38626	KYQ92767	EGG23451	EFA82811
OG0001350	EAL65930	EGC29556	KYR01055, KYR01056	EGG15988	EFA82131
OG0001351	EDR41065		KYQ90501	EGG22334	EFA78030, EFA82711, EFA83968
OG0001352	EAL65681	EGC30887	KYQ96904, KYR00207	EGG17967	EFA76098
OG0001353	EAL65656	EGC30254, EGC33920	KYR01273	EGG17976	EFA74879
OG0001354	EAL65646	EGC32037	KYR01248	EGG18375, EGG21252	EFA76382
OG0001355	EAL63844, EAL65615	EGC33726	KYQ89944	EGG17931	EFA81730
OG0001356	EAL65574	EGC30811	KYQ93372	EGG23334	EFA77626, EFA86763
OG0001357	EAL65542	EGC32965	KYQ92851	EGG18850	EFA82619, EFA82620
OG0001358	EAL65494	EGC29106	KYQ89982, KYQ90072	EGG17664	EFA80003
OG0001359	EAL65451	EGC28322	KYQ88492, KYQ88493	EGG14224	EFA83017
OG0001360	EAL65457	EGC40176		EGG17733	EFA80632, EFA83199, EFA85139
OG0001361	EAL65442	EGC38619	KYR01195	EGG17607, EGG17608	EFA83967
OG0001362	EAL65435	EGC38196	KYQ93920	EGG20193, EGG23608	EFA78192
OG0001363	EAL65392		KYQ89947	EGG13796	EFA76404, EFA77233, EFA80160
OG0001364	EAL65355	EGC29303	KYQ96919	EGG20538	EFA86363, EFA86364
OG0001365	EAL65299	EGC39716	KYQ96798	EGG13603, EGG23620	EFA81573
OG0001366	EAL65226	EGC38001	KYQ89189	EGG23625	EFA77148, EFA81086
OG0001367	EAL65234	EGC38816	KYQ96850	EGG14935	EFA78026, EFA80279
OG0001368	EAL65213	EGC37934	KYQ89335	EGG17246, EGG23932	EFA83871
OG0001369	EAL65252	EGC37960	KYQ89336	EGG14669	EFA80109, EFA82219
OG0001370	EAL65164	EGC35820	KYQ90024	EGG16181	EFA76422, EFA76423
OG0001371	EAL65172	EGC33820	KYQ93047, KYR00936	EGG13876	EFA78073
OG0001372	EAL65075, EEU04088	EGC39772	KYQ96812	EGG24275	EFA75621
OG0001373	EAL65023	EGC30551, EGC35088	KYQ92282	EGG21150	EFA85460
OG0001374	EAL65029, EAL65030	EGC29131	KYQ89207	EGG22583	EFA79150
OG0001375	EAL65033	EGC29129	KYQ90147	EGG18305, EGG19389	EFA77694
OG0001376	EAL65018	EGC32287	KYR00594, KYR01301	EGG19551	EFA78314
OG0001377	EAL64932	EGC30889	KYR01138	EGG17127, EGG17129	EFA74990
OG0001378	EAL64868	EGC31344	KYQ96724	EGG14205, EGG14216	EFA76916
OG0001379	EAL64874	EGC36922	KYQ96673	EGG19865, EGG19872	EFA77725
OG0001380	EAL64838	EGC36914	KYQ92388	EGG18881, EGG18882	EFA81524
OG0001381	EAL64855	EGC35622	KYQ92383	EGG22743	EFA74651, EFA74670
OG0001382	EAL64786	EGC38131, EGC38227	KYQ93030	EGG19899	EFA77166
OG0001383	EAL64746	EGC38103	KYQ93286, KYR01927	EGG18368	EFA79276
OG0001384	EAL64782	EGC35092	KYQ89658	EGG15148, EGG15149	EFA78375
OG0001385	EAL64565, EAL64566	EGC33664	KYQ94210	EGG15080	EFA80961
OG0001386	EAL64588	EGC34077	KYR00119	EGG13308	EFA77578, EFA77579
OG0001387	EAL64608	EGC33547, EGC36473	KYQ93538	EGG23297	EFA77681
OG0001388	EAL64635	EGC35594	KYQ91530	EGG14898, EGG20883	EFA78657
OG0001389	EAL64719	EGC32427	KYQ89364, KYR00172	EGG16499	EFA81173
OG0001390	EAL64656	EGC33370	KYR02728	EGG21326, EGG21643	EFA80090
OG0001391	EAL64700	EGC38738, EGC38767	KYR02901	EGG16413	EFA85746
OG0001392	EAL64530, EAL64543	EGC31853, EGC38123		EGG19822	EFA79229
OG0001393	EDR41053	EGC35205, EGC38066	KYQ92055	EGG21160	EFA84497
OG0001394	EAL64391	EGC39159	KYQ92326	EGG22444, EGG22447	EFA83999
OG0001395	EAL64397	EGC33439, EGC36490	KYR01885	EGG22753	EFA84137
OG0001396	EAL64401	EGC35277, EGC38813	KYQ90646	EGG22448	EFA78595
OG0001397	EAL64357	EGC35865	KYQ92688, KYR00115	EGG16002	EFA85369
OG0001398	EAL64361	EGC35862	KYQ92623	EGG20014, EGG20015	EFA74573
OG0001399	EAL64364, EAL64365	EGC29663	KYQ93731	EGG23322	EFA81955
OG0001400	EAL64274	EGC36426	KYR00406	EGG14458	EFA80364, EFA81482
OG0001401	EAL64270	EGC32393, EGC40497	KYQ90886	EGG14692	EFA78932
OG0001402	EAL64295	EGC35284	KYQ91619, KYR00137	EGG18229	EFA80410
OG0001403	EAL64301	EGC32401	KYQ90823	EGG20366, EGG20367	EFA76047
OG0001404	EAL64201	EGC38039	KYQ90224, KYQ92930	EGG21346	EFA81063
OG0001405	EAL64210	EGC29594	KYR00127	EGG20892	EFA79943, EFA81663
OG0001406	EAL64220	EGC33788	KYQ89443	EGG13888	EFA80607, EFA81836
OG0001407	EAL64230		KYQ89448	EGG22496, EGG22497, EGG22532	EFA78910
OG0001408	EAL64248	EGC29651, EGC29652	KYQ92975	EGG14012	EFA81858
OG0001409	EAL64180	EGC36211, EGC37289	KYQ88581	EGG14023	EFA78510
OG0001410	EAL63869, EAL64097		KYQ89890	EGG17741, EGG25139	EFA86359
OG0001411	EAL64133	EGC33135	KYQ90386	EGG14354	EFA82955, EFA83570
OG0001412	EAL64138	EGC32762	KYQ89721, KYR02278	EGG24904	EFA77253
OG0001413	EAL64000	EGC32756	KYQ89734	EGG22663	EFA78235, EFA83172
OG0001414	EAL64002	EGC32023	KYQ94476	EGG13865, EGG19524	EFA81377
OG0001415	EAL63974	EGC37532, EGC37554	KYQ90904	EGG17577	EFA81301
OG0001416	EAL63882	EGC30508	KYQ89415, KYR01451, KYR01452		EFA83308
OG0001417		EGC28407, EGC31982, EGC39887	KYQ88202	EGG15250	EFA78497
OG0001418				EGG14623, EGG15262, EGG15515, EGG17394, EGG17737, EGG23947
OG0001419				EGG15325, EGG15328, EGG15329, EGG18951, EGG20291	EFA84618
OG0001420			KYQ92990	EGG15641, EGG16666, EGG19564, EGG22992	EFA75955
OG0001421			KYQ90006, KYQ93461, KYQ99905, KYR01527	EGG13969, EGG24036
OG0001422		EGC29373, EGC30535		EGG24226	EFA81798, EFA81799, EFA81800
OG0001423			KYQ88464, KYQ89752, KYR02449	EGG24282	EFA82423, EFA82468
OG0001424			KYQ92677, KYQ92678, KYQ92679	EGG24345	EFA74563, EFA77352
OG0001425				EGG17602, EGG17688, EGG18317, EGG18326, EGG24776, EGG25341
OG0001426				EGG17233, EGG25238	EFA77789, EFA77873, EFA86083, EFA86084
OG0001427			KYQ93982, KYQ93983	EGG13528, EGG14405, EGG16618, EGG17657
OG0001428				EGG17270, EGG18289, EGG18495, EGG22858, EGG22889	EFA85048
OG0001429			KYQ93001, KYQ93411, KYR02195	EGG16324, EGG17400, EGG19242
OG0001430				EGG14888, EGG14889, EGG17888, EGG17890, EGG17895, EGG20848
OG0001431			KYR00042	EGG13824	EFA79384, EFA79385, EFA79393, EFA79399
OG0001432			KYQ88934	EGG18000, EGG22822	EFA77179, EFA77180, EFA77181
OG0001433				EGG20055, EGG20056, EGG20057, EGG20058, EGG20059, EGG21456
OG0001434			KYQ90003, KYQ90940, KYQ90959, KYR00606, KYR00985	EGG22253
OG0001435				EGG22626	EFA78892, EFA83429, EFA83443, EFA83445, EFA86608
OG0001436		EGC34782, EGC37817	KYR00871	EGG21038	EFA81422, EFA81460
OG0001437			KYQ89610, KYQ91480, KYR00007		EFA81804, EFA84921, EFA85712
OG0001438			KYQ88400, KYQ89902, KYQ89919, KYQ91376, KYQ91393, KYQ91568
OG0001439			KYQ90334, KYQ90335, KYQ90369, KYQ90373, KYR01251, KYR02727
OG0001440			KYQ88866, KYQ89428, KYQ93185, KYQ94156		EFA75989, EFA82331
OG0001441					EFA76000, EFA80987, EFA82198, EFA83497, EFA86005, EFA86305
OG0001442					EFA81528, EFA81529, EFA81531, EFA81532, EFA81533, EFA81534
OG0001443	EAL62101	EGC30476	KYR00680	EGG14346	EFA77155
OG0001444	EAL62082	EGC34358	KYQ91739	EGG14056	EFA81885
OG0001445	EAL73178	EGC39974	KYQ91284	EGG14776	EFA75580
OG0001446	EAL72157	EGC29382	KYQ94188	EGG18713	EFA81720
OG0001447	EEU04128	EGC36094	KYQ89773	EGG18529	EFA82566
OG0001448	EAL70335		KYR01467, KYR02968	EGG20000	EFA86581
OG0001449	EEU04130	EGC40053	KYQ89697	EGG17526	EFA80559
OG0001450	EAL69769	EGC28971	KYQ91352	EGG13457	EFA83054
OG0001451	EAL68537	EGC35480	KYQ89491	EGG22531	EFA78911
OG0001452	EEU04107	EGC36884	KYQ92030	EGG16911	EFA84609
OG0001453	EAL67386	EGC37734	KYQ88330	EGG19619	EFA75301
OG0001454	EAL66605	EGC40287	KYQ92107	EGG23239	EFA81090
OG0001455	EAL66533	EGC36462	KYR00111	EGG23993	EFA78297
OG0001456	EAL65992	EGC29231	KYQ99806	EGG21721	EFA77372
OG0001457	EAL65556	EGC34526	KYR01691	EGG19046	EFA79175
OG0001458	EEU04092	EGC39754	KYQ96799	EGG23181	EFA81574
OG0001459	EAL60294	EGC32137	KYQ91026	EGG14482	EFA82283
OG0001460	EAL63812	EGC32277	KYQ91601	EGG13705	EFA86812
OG0001461	EAL63813, EAL63827	EGC34075	KYQ92921		EFA86806
OG0001462	EAL63818	EGC32834	KYR00884	EGG22547	EFA84496
OG0001463	EAL63808	EGC36268	KYQ89997	EGG17943	EFA86804
OG0001464	EAL63829	EGC36024	KYQ88223	EGG21651	EFA86802
OG0001465	EAL63836	EGC36025	KYQ92011	EGG14159	EFA86801
OG0001466	EAL63830	EGC36026	KYQ91407	EGG14160	EFA80542
OG0001467	EAL63822	EGC36003, EGC40426		EGG20498	EFA82894
OG0001468	EAL63823	EGC36004	KYQ94377	EGG17934	EFA85504
OG0001469	EAL63832	EGC36013	KYQ94376	EGG15708	EFA78185
OG0001470	EAL63798	EGC30088	KYQ93514	EGG19200	EFA86759
OG0001471	EAL63805	EGC31617	KYQ89356	EGG19202	EFA86760
OG0001472	EAL63800	EGC29320	KYQ90487	EGG19600	EFA81455
OG0001473	EAL63801	EGC31624	KYQ93163	EGG13260	EFA81638
OG0001474	EAL63802	EGC31625	KYQ94440	EGG19160	EFA81520
OG0001475	EAL63797	EGC35703	KYR01414	EGG14256	EFA77098
OG0001476	EAL63719	EGC36452	KYQ90135	EGG21154	EFA74503
OG0001477	EAL63720, EAL63722	EGC36459, EGC36461			EFA83785
OG0001478	EAL63726	EGC35046	KYQ91614	EGG17790	EFA86775
OG0001479	EAL63730	EGC38705	KYQ88923	EGG17885	EFA85490
OG0001480	EAL63731	EGC38677	KYQ91299	EGG17930	EFA85493
OG0001481	EAL63733	EGC29277	KYQ93485	EGG23011	EFA81448
OG0001482	EAL63734	EGC30232	KYQ88918	EGG22367	EFA86601
OG0001483	EAL63736	EGC30678	KYQ91599	EGG20734	EFA76132
OG0001484	EAL63740	EGC30229	KYQ90229	EGG19270	EFA77094
OG0001485	EEU04072	EGC30231	KYQ90228	EGG18122	EFA77877
OG0001486	EAL63743	EGC36008	KYQ89362	EGG19093	EFA81717
OG0001487	EAL63744	EGC33299	KYQ91379	EGG20400	EFA86606
OG0001488	EAL63790	EGC38671	KYR01363	EGG17618	EFA85926
OG0001489	EAL63776	EGC38672	KYQ93711	EGG13627	EFA79521
OG0001490	EAL63748	EGC38703	KYQ91346	EGG17948	EFA81470
OG0001491	EDR41046	EGC38673	KYQ88954	EGG16909	EFA76553
OG0001492	EDR41047	EGC38674	KYQ88953	EGG17883	EFA85489
OG0001493	EAL63750	EGC32284	KYQ91602	EGG17805	EFA74980
OG0001494	EAL63753	EGC36265	KYQ91505	EGG18123	EFA77527
OG0001495	EAL63715	EGC30227	KYQ91493	EGG17364	EFA85496
OG0001496	EAL63713	EGC36022	KYQ91495	EGG24906	EFA82217
OG0001497	EAL63756	EGC36023	KYQ92992	EGG17604	EFA78863
OG0001498	EAL63757	EGC29275	KYQ91372	EGG13472	EFA81300
OG0001499	EAL63763	EGC34308	KYR00588	EGG23604	EFA85232
OG0001500	EAL63764	EGC34291	KYQ91477	EGG25365	EFA84233
OG0001501	EAL63766	EGC30919	KYQ89994	EGG14334	EFA76682
OG0001502	EAL63768	EGC30923	KYR01572	EGG15930	EFA75521
OG0001503	EAL63770	EGC30922	KYQ89234	EGG17676	EFA86778
OG0001504	EAL63771	EGC30921	KYR01370	EGG14473	EFA76686
OG0001505	EAL63775	EGC35301	KYQ91592	EGG25218	EFA80272
OG0001506	EAL63696	EGC35111	KYR01479	EGG22126	EFA85150
OG0001507	EAL63699	EGC35109	KYQ93450	EGG14030	EFA81890
OG0001508	EAL63700	EGC35122	KYQ94014	EGG24357	EFA84685
OG0001509	EAL63695	EGC32816	KYR02337	EGG18718	EFA81640
OG0001510	EAL63690	EGC36218	KYQ91891	EGG23566	EFA78190
OG0001511	EAL63656	EGC36270	KYQ93444	EGG13942	EFA83529
OG0001512	EAL63657	EGC36283	KYQ96801	EGG20996	EFA81851
OG0001513	EAL63684	EGC38367	KYR02849	EGG21391	EFA84547
OG0001514	EAL63658	EGC36005	KYR02848	EGG14273	EFA84548
OG0001515	EAL63653	EGC36014	KYQ93250	EGG14337	EFA75186
OG0001516	EAL63659	EGC38349	KYQ93251	EGG17689	EFA75097
OG0001517	EAL63664	EGC38340	KYQ92709	EGG16528	EFA80628
OG0001518	EAL63652	EGC38365	KYQ93452	EGG16302	EFA78109
OG0001519	EAL63668	EGC38706	KYQ94018	EGG22667	EFA74997
OG0001520	EAL63686	EGC36441	KYQ91575	EGG17502	EFA74797
OG0001521	EAL63670	EGC30916	KYR02634	EGG19977	EFA76777
OG0001522	EAL63671	EGC30917	KYR02632	EGG15845	EFA82930
OG0001523	EAL63675	EGC30640	KYR02990	EGG15830	EFA81185
OG0001524	EAL63676	EGC36269	KYQ94051	EGG14078	EFA81673
OG0001525	EAL63677	EGC33252	KYR02876	EGG13717	EFA81898
OG0001526	EAL63688	EGC35112	KYQ88724	EGG21717	EFA80368
OG0001527	EAL63681	EGC38343	KYR02705	EGG21909	EFA75250
OG0001528	EAL63635	EGC33238	KYQ89128	EGG25364	EFA83811
OG0001529	EAL63637	EGC33248	KYQ91199	EGG25381	EFA84249
OG0001530	EAL63607, EAL63638	EGC38374			EFA74780, EFA84209
OG0001531	EAL63609	EGC36196	KYQ92736	EGG22411	EFA79529
OG0001532	EAL63610	EGC36195	KYQ92721	EGG14842	EFA81661
OG0001533	EAL63612	EGC36194	KYQ91070	EGG15966	EFA75600
OG0001534	EAL63639	EGC36193	KYQ92608	EGG17525	EFA75559
OG0001535	EAL63640	EGC36192	KYQ92609	EGG23120	EFA75557
OG0001536	EAL63617	EGC36273	KYQ93058	EGG21357	EFA80968
OG0001537	EAL63618	EGC36249	KYR03039	EGG14534	EFA80657
OG0001538	EAL63619	EGC35068	KYR03038	EGG25056	EFA80656
OG0001539	EAL63620	EGC35054	KYR02332	EGG23330	EFA74891
OG0001540	EAL63621	EGC34290	KYR01686	EGG18835	EFA80393
OG0001541	EAL63622	EGC34304	KYQ91991	EGG17340	EFA79540
OG0001542	EAL63606	EGC34289	KYQ91990	EGG17342	EFA79539
OG0001543	EAL63601	EGC32464	KYQ88346	EGG17353	EFA79526
OG0001544	EAL63646	EGC32831	KYQ91492	EGG15660	EFA83747
OG0001545	EAL63625	EGC31626	KYQ89359	EGG21260	EFA84824
OG0001546	EAL63626	EGC35300	KYQ89358	EGG21259	EFA84823
OG0001547	EAL63628	EGC35310	KYQ89361	EGG21258	EFA81120
OG0001548	EAL63630	EGC32282	KYQ89244	EGG14248	EFA86809
OG0001549	EAL63648	EGC36451	KYQ90691	EGG15776	EFA84812
OG0001550	EAL63631	EGC35702	KYQ94378	EGG17899	EFA85483
OG0001551	EAL63494	EGC32830		EGG21811, EGG21825	EFA85687
OG0001552	EAL63495	EGC32829	KYQ91560	EGG21824	EFA81096
OG0001553	EAL63499, EAL64126	EGC32752	KYQ91129	EGG15413
OG0001554	EAL63500	EGC33247	KYR00660	EGG21311	EFA81344
OG0001555	EAL63502	EGC33234	KYQ91478	EGG25318	EFA84232
OG0001556	EAL63581	EGC32832	KYQ91491	EGG15498	EFA82379
OG0001557	EAL63508	EGC36009	KYR00064	EGG14024	EFA81868
OG0001558	EAL63510	EGC36028	KYR00186	EGG17495	EFA77389
OG0001559	EAL63511	EGC36027	KYR00188	EGG22492	EFA75606
OG0001560	EAL63512	EGC38353	KYR00189	EGG22491	EFA75607
OG0001561	EAL63514	EGC36267	KYQ89996	EGG15146	EFA86803
OG0001562	EAL63583	EGC29461	KYR02699	EGG18328	EFA80918
OG0001563	EAS66845	EGC29462	KYQ88787	EGG25194	EFA78565
OG0001564	EAL63515	EGC29459	KYQ88786	EGG25193	EFA78566
OG0001565	EAL63516	EGC32474	KYQ91970	EGG17093	EFA79528
OG0001566	EAL63517	EGC36316	KYQ90782	EGG22999	EFA85946
OG0001567	EEU04069	EGC34022	KYQ94364	EGG18868	EFA79352
OG0001568	EAL63521	EGC34023	KYQ93378	EGG24937	EFA80423
OG0001569	EAL63522	EGC35648	KYQ93373	EGG21763	EFA86691
OG0001570	EDR41045	EGC38338	KYQ93399	EGG14360	EFA75457
OG0001571	EAL63523	EGC38886	KYR01281	EGG18973	EFA74595
OG0001572	EAL63524	EGC35119	KYQ93412	EGG14791	EFA82602
OG0001573	EAL63527	EGC37235	KYQ90414	EGG22562	EFA82776
OG0001574	EAL63575	EGC36043	KYQ88614	EGG14651	EFA82762
OG0001575	EAL63531	EGC35120	KYQ89852	EGG20147	EFA86651
OG0001576	EAL63534	EGC33314	KYQ90532	EGG22645	EFA76720
OG0001577	EAL63535	EGC30089	KYR03047	EGG15441	EFA83749
OG0001578	EAL63536	EGC30097	KYR03046	EGG15442	EFA83750
OG0001579	EAL63547	EGC38810	KYR03053	EGG17067	EFA79122
OG0001580	EAL63548	EGC37324	KYQ91087	EGG21946	EFA82417
OG0001581	EAL63574	EGC37325	KYQ91088	EGG14585	EFA78321
OG0001582	EAL63552	EGC33315	KYQ90534	EGG22637	EFA76718
OG0001583	EAL63591	EGC33301	KYQ90533	EGG22646	EFA76719
OG0001584	EAL63592	EGC30096	KYR03051	EGG15440	EFA83748
OG0001585	EAL63553	EGC35104	KYQ93106	EGG16104	EFA80276
OG0001586	EAL63554	EGC28900	KYQ89850	EGG20145	EFA79457
OG0001587	EAL63555	EGC35117	KYR02676	EGG16116	EFA81247
OG0001588	EAL63558	EGC35060	KYQ92871	EGG14858	EFA76754
OG0001589	EAL63559	EGC29805	KYR00347		EFA75270, EFA81158
OG0001590	EAL63560	EGC29800	KYR00346	EGG14949	EFA81148
OG0001591	EAL63561	EGC39952	KYQ89315	EGG20146	EFA85011
OG0001592	EAL63562	EGC39990	KYQ89316	EGG19807	EFA86653
OG0001593	EAL63568	EGC34024	KYQ93375	EGG14994	EFA79922
OG0001594	EAL63570	EGC35634	KYQ93374	EGG18363	EFA82356
OG0001595	EAL63596	EGC34309	KYQ93223	EGG17739	EFA84015
OG0001596	EAL63573	EGC35711	KYR02375	EGG22711	EFA86685
OG0001597	EAL63483	EGC35053	KYR01796	EGG14494	EFA82539
OG0001598	EAL63485	EGC28248	KYR02487	EGG14970	EFA85035
OG0001599	EAL63474	EGC35115	KYQ92995	EGG18883	EFA81521
OG0001600	EAL63475	EGC34295	KYQ92878	EGG21646	EFA78214
OG0001601	EAL63476	EGC36199	KYQ92883	EGG14611	EFA77492
OG0001602	EAL63465	EGC36275	KYR01683	EGG25104	EFA80449
OG0001603	EAL63467	EGC36276	KYQ93466	EGG16147	EFA75469
OG0001604	EAL63468	EGC36277	KYQ90855	EGG23821	EFA76166
OG0001605	EAL63463	EGC36255	KYQ90227	EGG14761	EFA84738
OG0001606	EAL63461	EGC36245	KYR01213	EGG17802	EFA80855
OG0001607	EAL63464	EGC36271	KYR01405	EGG21352	EFA77954
OG0001608	EAL63410	EGC36257	KYR00942	EGG18072	EFA81833
OG0001609	EAL63413	EGC28872	KYR02221	EGG22998	EFA85948
OG0001610	EAL63414	EGC36019	KYQ90707	EGG15778	EFA76168
OG0001611	EAL63417	EGC32987	KYQ94424	EGG20226	EFA77759
OG0001612	EAL63422	EGC32971	KYQ89802	EGG16447	EFA82820
OG0001613	EAL63429	EGC32647	KYQ93632	EGG17121	EFA86362
OG0001614	EAL63430	EGC32662	KYQ89779	EGG18747	EFA78762
OG0001615	EAS66844	EGC29213	KYQ92877	EGG21658	EFA75685
OG0001616	EAL63438	EGC35057	KYQ88187	EGG16101	EFA81234
OG0001617	EAL63439	EGC35059	KYQ88185	EGG14329	EFA79424
OG0001618	EAL63440	EGC35304	KYR00538	EGG15145	EFA75231
OG0001619	EAL63441	EGC35315	KYQ96957	EGG24812	EFA80095
OG0001620	EAL63446	EGC32463	KYR00360	EGG16150	EFA76742
OG0001621	EAL63448	EGC36011	KYR02731	EGG19649	EFA85747
OG0001622	EAL63449	EGC34300	KYQ89885	EGG17539	EFA86652
OG0001623	EAL63452	EGC37250	KYQ90413	EGG22561	EFA82777
OG0001624	EAL63399	EGC38319	KYQ90412	EGG22560	EFA82778
OG0001625	EAL63379	EGC30413	KYQ90410	EGG22747	EFA79026
OG0001626	EAL63380	EGC30416	KYQ90409	EGG21070	EFA84605
OG0001627	EAL63400	EGC36012	KYR03054	EGG20074	EFA85474
OG0001628	EAL63405	EGC36033	KYR03056	EGG20073	EFA85475
OG0001629	EAL63394	EGC32989	KYQ94463	EGG20664	EFA76273
OG0001630	EAL63408	EGC32978	KYQ94461	EGG13264	EFA82517
OG0001631	EAL63377	EGC32661	KYQ89396	EGG18800	EFA78753
OG0001632	EAL63397	EGC28663	KYQ89812	EGG16229	EFA75383
OG0001633	EAL63398	EGC28662	KYQ89806	EGG17003	EFA85068
OG0001634	EAS66843		KYQ93018	EGG17541, EGG21520	EFA82276
OG0001635	EAL63354	EGC38697	KYQ89725	EGG24857	EFA85213
OG0001636	EEU04066	EGC38698	KYQ89724	EGG24854	EFA81621
OG0001637	EEU04067	EGC38699	KYQ88868	EGG16793	EFA78452
OG0001638	EAL63356	EGC38669	KYQ93689	EGG16590	EFA75409
OG0001639	EAL63360	EGC30271	KYQ93691	EGG15064	EFA75406
OG0001640	EAL63361	EGC35305	KYQ88555	EGG21390	EFA75078
OG0001641	EAL63362	EGC28781	KYR02686	EGG16011	EFA83266
OG0001642	EAL63375	EGC28780	KYR02688	EGG16123	EFA81239
OG0001643	EAL63365	EGC34287	KYR02841	EGG14903	EFA76939
OG0001644	EAL63367	EGC40008	KYQ91283	EGG14780	EFA75579
OG0001645	EAL63368	EGC32820	KYR00202	EGG19714	EFA79573
OG0001646	EAL63370, EAL69433	EGC32818	KYQ94020	EGG19654
OG0001647	EAL62205, EAL63327		KYQ90092, KYQ94470, KYR02208
OG0001648	EAL63349	EGC37255	KYR02432	EGG20095	EFA83353
OG0001649	EAL63322	EGC37258	KYQ94420	EGG15809	EFA79717
OG0001650	EAL63331	EGC37237	KYR02406	EGG17329	EFA83352
OG0001651	EAL63332	EGC37253	KYR02407	EGG17330	EFA83351
OG0001652	EAL63321	EGC37251	KYR02409	EGG22052	EFA83887
OG0001653	EAL63351	EGC34011	KYQ90278	EGG15748	EFA83256
OG0001654	EAL63335	EGC35307	KYQ94381	EGG20958	EFA82972
OG0001655	EAL63338	EGC38373	KYQ93383	EGG14925	EFA82729
OG0001656	EAL63339	EGC38352	KYQ93184	EGG16695	EFA86574
OG0001657	EAL63346		KYQ92448	EGG22254	EFA78390, EFA84912
OG0001658	EAL63343	EGC33242	KYQ92717	EGG14395	EFA78727
OG0001659	EAL63352	EGC33250	KYQ92716	EGG13760	EFA77774
OG0001660	EAL63344	EGC33243	KYQ92708	EGG13759	EFA77773
OG0001661	EAL63307	EGC33244	KYQ92707	EGG13758	EFA77775
OG0001662	EAL63309	EGC40098	KYQ91057	EGG15021	EFA77193
OG0001663	EAL63310	EGC37242	KYQ91059	EGG18445	EFA79113
OG0001664	EAL63317	EGC37241	KYQ99815	EGG24460	EFA83732
OG0001665	EAL63311	EGC37259	KYQ91138	EGG19374	EFA75017
OG0001666	EAL63318	EGC31930	KYQ92884	EGG24384	EFA77491
OG0001667	EAL63315	EGC35308	KYQ94021	EGG14724	EFA77297
OG0001668	EAL63306	EGC35309	KYQ90281	EGG20302	EFA83253
OG0001669	EAL63299	EGC37333	KYR01089	EGG17803	EFA80856
OG0001670	EAL63300	EGC37332	KYR01088	EGG24108	EFA80878
OG0001671	EAL63286	EGC35294	KYQ92729	EGG14796	EFA79513
OG0001672	EAL63287	EGC35048	KYQ96902	EGG19846	EFA85113
OG0001673	EAL63288	EGC38377	KYR02681	EGG18202	EFA84381
OG0001674	EAL63289	EGC38376	KYR00173	EGG16768	EFA76248
OG0001675	EAL63292	EGC33241	KYR00170	EGG16765	EFA76251
OG0001676	EAL63294	EGC38293	KYQ91055	EGG23122	EFA75553
OG0001677	EAL63296	EGC36214	KYQ92610	EGG23119	EFA75556
OG0001678	EAL63276	EGC34298	KYQ92881	EGG19513	EFA80388
OG0001679	EAL63258	EGC34297	KYQ92880	EGG13894	EFA81346
OG0001680	EAL63259	EGC35038	KYQ91169	EGG14444	EFA75453
OG0001681	EAL63260	EGC35056	KYQ88965	EGG23703	EFA80694
OG0001682	EAL63261	EGC35050	KYR01851	EGG16539	EFA80630
OG0001683	EAL63262	EGC35051	KYR00423	EGG16538	EFA80631
OG0001684	EAL63263	EGC35052	KYR00418	EGG17572	EFA74801
OG0001685	EAL63256	EGC28986	KYR01824	EGG14969	EFA81679
OG0001686	EAL63271	EGC28991	KYR01822	EGG14939	EFA81683
OG0001687	EAL63272	EGC28988	KYR01821	EGG14938	EFA81684
OG0001688	EAL63277	EGC28989	KYR01863	EGG14874	EFA81685
OG0001689	EAS66839	EGC30418	KYR00349	EGG14960	EFA84452
OG0001690	EAL63280	EGC31049	KYR01890	EGG17833	EFA77567
OG0001691	EAS66840	EGC38713	KYQ89537	EGG18356	EFA75945
OG0001692	EAL63213	EGC37338	KYQ89824	EGG24532	EFA74819
OG0001693	EAL63215	EGC30276	KYQ93692	EGG21039	EFA85352
OG0001694	EAL63218	EGC37340	KYQ91849	EGG14364	EFA82156
OG0001695	EAL63212	EGC30162	KYQ93770	EGG13916	EFA75002
OG0001696	EAL63219	EGC30161	KYQ93773	EGG25342	EFA78999
OG0001697	EAL63249	EGC30165	KYQ93771	EGG14073	EFA75003
OG0001698	EAL63221	EGC30273	KYQ93020	EGG17542	EFA76350
OG0001699	EAL63226	EGC38668	KYQ89726	EGG24855	EFA85212
OG0001700	EAL63250	EGC38696	KYQ89728	EGG24860	EFA82075
OG0001701	EAL63228	EGC38695	KYQ94360	EGG16039	EFA79576
OG0001702	EAL63252	EGC38786	KYR01913	EGG23598	EFA79727
OG0001703	EAL63243	EGC30876	KYR02839	EGG17000	EFA76889
OG0001704	EAL63245	EGC29480	KYQ90677	EGG21705	EFA80454
OG0001705	EAL63255	EGC33496, EGC34846		EGG22725, EGG22765
OG0001706	EAL63203	EGC32979	KYQ94438	EGG19173	EFA81537
OG0001707	EAL63204	EGC32990	KYQ94439	EGG19172	EFA81519
OG0001708	EAL63206	EGC28468	KYQ89886	EGG19804	EFA75593
OG0001709	EAL63207	EGC28467	KYR01993	EGG22084	EFA74603
OG0001710	EAL63208	EGC36317	KYQ94052	EGG14040	EFA81672
OG0001711	EAL63210	EGC30093	KYQ91120	EGG24047	EFA78320
OG0001712	EAL63202	EGC30092	KYQ91122	EGG24531	EFA74817
OG0001713	EAS66841	EGC30091	KYQ91123	EGG14070	EFA74818
OG0001714	EAS66842	EGC35116	KYQ91124	EGG17847	EFA75948
OG0001715	EAL63193	EGC36331	KYQ94053	EGG19713	EFA74862
OG0001716	EAL63189	EGC30099	KYQ91119	EGG24053	EFA78319
OG0001717	EAL63196	EGC36318	KYQ91680	EGG20144	EFA74897
OG0001718	EAL63199	EGC30233	KYQ91669	EGG24326	EFA86632
OG0001719	EAL63191	EGC36017	KYR00379	EGG16167	EFA75802
OG0001720	EAL63190	EGC31686	KYQ89134	EGG22945	EFA78607
OG0001721	EAL63186	EGC28360	KYQ88352	EGG23503	EFA76072
OG0001722	EAL63180	EGC29481, EGC33746	KYQ90186		EFA77212
OG0001723	EAL63177	EGC29488	KYQ90676	EGG18841	EFA81474
OG0001724	EAL63184	EGC29810	KYQ90712	EGG18844	EFA82570
OG0001725	EAL63171	EGC31695	KYQ90710	EGG13665	EFA74519
OG0001726	EAL63172	EGC31689	KYQ89619	EGG22820	EFA78604
OG0001727	EAL63174	EGC31927	KYR02850	EGG13695	EFA81895
OG0001728	EAL63164	EGC32471	KYQ88938	EGG13694	EFA81896
OG0001729	EAL63165	EGC32478	KYR02872	EGG22364	EFA83956
OG0001730	EAL63166	EGC31939	KYR02875	EGG13693	EFA81897
OG0001731	EAL63167	EGC31940	KYR02443	EGG15275	EFA82576
OG0001732	EAL63168	EGC32475	KYR03092	EGG23688	EFA82577
OG0001733	EAL63139	EGC32468	KYR03094	EGG19968	EFA74906
OG0001734	EAL63141	EGC28440	KYQ89807	EGG17589	EFA74631
OG0001735	EAL63142	EGC36007	KYR00363	EGG14961	EFA85922
OG0001736	EAL63144	EGC36216	KYQ93508	EGG23615	EFA77215
OG0001737	EAL63138	EGC37711	KYQ91093	EGG17594	EFA79075
OG0001738	EAL63154	EGC37710	KYQ91083	EGG16583	EFA75224
OG0001739	EAL63156	EGC31852	KYQ91405	EGG23605	EFA84597
OG0001740	EAL63158	EGC31076	KYQ93343	EGG19970	EFA80271
OG0001741	EAL63159	EGC31081	KYQ90287	EGG22709	EFA76179
OG0001742	EAL63137	EGC31851	KYR00422	EGG13929	EFA80803
OG0001743	EAL63136	EGC31850	KYR00390	EGG22455	EFA80805
OG0001744	EAL63132	EGC29115	KYQ89722	EGG24849	EFA85215
OG0001745	EAL63133	EGC29890	KYQ89723	EGG24853	EFA85214
OG0001746	EAS66838	EGC32659	KYQ93363	EGG16513	EFA81043
OG0001747	EAL63131	EGC31079	KYR01314	EGG21478	EFA85641
OG0001748	EAL63123	EGC31074	KYQ93031	EGG13730	EFA85645
OG0001749	EAL63124	EGC32650	KYR01313	EGG14124	EFA79001
OG0001750	EAL63117	EGC32651	KYR01835	EGG21295	EFA76163
OG0001751	EAL63118	EGC31077	KYQ94465	EGG20667	EFA75605
OG0001752	EAL63125	EGC32664	KYQ92088	EGG25273	EFA79863
OG0001753	EAL63126	EGC32467	KYR02474	EGG14928	EFA78275
OG0001754	EAL63127	EGC31942	KYR02472	EGG14927	EFA78276
OG0001755	EAL63106	EGC31934	KYQ93415	EGG14937	EFA75458
OG0001756	EAL63113	EGC30726	KYQ93507	EGG23565	EFA77214
OG0001757	EAL63104	EGC30267	KYQ94445	EGG15217	EFA81475
OG0001758	EAL63073	EGC29458	KYQ89801	EGG16325	EFA74627
OG0001759	EAL63074	EGC32988	KYQ94466	EGG20668	EFA75604
OG0001760	EAL63077	EGC38381	KYR02254	EGG16600	EFA82480
OG0001761	EAL63071	EGC34012	KYR02066	EGG25290	EFA77144
OG0001762	EAL63079	EGC29333, EGC33348, EGC36438, EGC40466
OG0001763	EAL63081	EGC34020	KYQ88186	EGG16102	EFA81211
OG0001764	EAL63082	EGC34013	KYQ93128	EGG16103	EFA81210
OG0001765	EAL63084	EGC34016	KYR02069	EGG16960	EFA78433
OG0001766	EAL63085	EGC37331	KYR02070	EGG22509	EFA78437
OG0001767	EAL63090	EGC38805	KYR02071	EGG17189	EFA85656
OG0001768	EAL63091	EGC38806	KYR01911	EGG13723	EFA85652
OG0001769	EAL63072	EGC38783	KYR00726	EGG15752	EFA82768
OG0001770	EAL63093	EGC36294	KYR02293	EGG13478	EFA79518
OG0001771	EAL63070	EGC31073	KYQ89684	EGG24039	EFA77309
OG0001772	EAL63096	EGC29626	KYQ94447	EGG17281	EFA84317
OG0001773	EAS66836	EGC29628	KYQ94455	EGG16619	EFA75615
OG0001774	EAL63099	EGC29627	KYQ94454	EGG25340	EFA75614
OG0001775	EAL63068	EGC28964	KYQ94453	EGG25338	EFA75613
OG0001776	EAL63069	EGC28962	KYQ94452	EGG25337	EFA85156
OG0001777	EAL63066	EGC28963	KYQ94451	EGG17603	EFA84313
OG0001778	EAL63067	EGC28961	KYQ94450	EGG20662	EFA75709
OG0001779	EAL63065	EGC28873	KYQ89789	EGG22569	EFA82779
OG0001780	EEU04064	EGC37528	KYQ89790	EGG18207	EFA82824
OG0001781	EAL63061	EGC37526	KYR02461	EGG23272	EFA77678
OG0001782	EAS66835	EGC37527	KYQ96948	EGG15781	EFA82909
OG0001783	EAL63006	EGC37548	KYQ96954	EGG15753	EFA82907
OG0001784	EAL63053	EGC37975	KYR02462	EGG23273	EFA77679
OG0001785	EAL63013	EGC28830	KYQ96936	EGG23275	EFA77680
OG0001786	EAL63019	EGC37997	KYQ89788	EGG21580	EFA79839
OG0001787	EAL63021	EGC39083	KYQ99962	EGG16218	EFA80238
OG0001788	EAL63022	EGC39055	KYQ91701	EGG21528	EFA75230
OG0001789	EAL63024	EGC28493	KYR02830	EGG19702	EFA80952
OG0001790	EAL63025	EGC31144	KYQ93472	EGG17218	EFA77627
OG0001791	EAL63008	EGC31145	KYQ93471	EGG17217	EFA76946
OG0001792	EAL63027	EGC31138	KYQ88488	EGG23204	EFA85722
OG0001793	EAL63030	EGC30730	KYQ88613	EGG17470	EFA78316
OG0001794	EAL63031	EGC30729	KYQ88612	EGG24056	EFA78317
OG0001795	EAL63032	EGC30728	KYQ89578	EGG18224	EFA80206
OG0001796	EAL63033	EGC30735	KYR00391	EGG22527	EFA86633
OG0001797	EAL63038	EGC39082	KYQ99964	EGG13286	EFA76697
OG0001798	EAL63039	EGC31069	KYR02397	EGG16511	EFA79414
OG0001799	EAL63045	EGC39079	KYQ99965	EGG13287	EFA76698
OG0001800	EAL63046	EGC39080	KYQ99966	EGG13319	EFA76699
OG0001801	EAL63057	EGC28330	KYQ91712	EGG13461	EFA85825
OG0001802	EAL63058	EGC33319	KYQ91721	EGG17499	EFA74951
OG0001803	EAL63000	EGC33124	KYQ88483	EGG21494	EFA83947
OG0001804	EAL62968, EAL65688, EAL70198	EGC30645, EGC37090
OG0001805	EAL62969	EGC37545	KYQ88485	EGG22223	EFA74915
OG0001806	EAL62970	EGC37524	KYQ88484	EGG22222	EFA74914
OG0001807	EAL62971	EGC28883	KYQ89552	EGG14184	EFA83659
OG0001808	EAL62973	EGC29881	KYR02827	EGG14186	EFA83647
OG0001809	EAL63001	EGC29875	KYR02828	EGG14169	EFA83661
OG0001810	EAL62998	EGC29874	KYR02829	EGG14168	EFA83664
OG0001811	EAL62975	EGC32489	KYQ99972	EGG15109	EFA82152
OG0001812	EAL62976	EGC32488, EGC34420, EGC38965		EGG20173
OG0001813	EAL62977	EGC32501	KYQ99971	EGG15119	EFA82153
OG0001814	EAL62978	EGC33127	KYQ88482	EGG21495	EFA74899
OG0001815	EAL62961	EGC29892	KYR02154	EGG19894	EFA77854
OG0001816	EAL62985	EGC29887	KYQ91047	EGG13615	EFA84419
OG0001817	EAL62988	EGC29888	KYQ91048	EGG13631	EFA85315
OG0001818	EAL63003	EGC33949	KYQ91661	EGG13294	EFA86233
OG0001819	EAL62990	EGC33950	KYQ91662	EGG13283	EFA84206
OG0001820	EAL63004	EGC33937	KYQ91782	EGG13296	EFA84203
OG0001821	EAL62991	EGC33938	KYQ91660	EGG13321	EFA82485
OG0001822	EAL62992	EGC33948	KYQ91659	EGG13303	EFA82101
OG0001823	EAL62993	EGC29212	KYR02811	EGG14052	EFA81199
OG0001824	EAL63005	EGC33112	KYR02809	EGG22545	EFA81159
OG0001825	EAL62994	EGC33123	KYQ99822	EGG19963	EFA86252
OG0001826	EAL62997	EGC33122	KYQ99826	EGG17924	EFA83868
OG0001827	EAL62962	EGC28657	KYQ91052	EGG15434	EFA76493
OG0001828	EAL62958	EGC28400	KYR01620	EGG22936	EFA81044
OG0001829	EAL62943	EGC36786	KYQ91046	EGG15734	EFA78579
OG0001830	EAL62944	EGC33720	KYQ99980	EGG13268	EFA76740
OG0001831	EAL62945	EGC31603	KYQ91038	EGG16964	EFA76712
OG0001832	EAL62946	EGC31848	KYQ88660	EGG20796	EFA86271
OG0001833	EAL62950	EGC31846	KYQ91626	EGG13299	EFA83246
OG0001834	EAL62919	EGC28276	KYQ91621	EGG13306	EFA83243
OG0001835	EAL62921	EGC28278	KYQ91632	EGG21619	EFA83242
OG0001836	EAL62917	EGC31066	KYQ91631	EGG21618	EFA83241
OG0001837	EAL62922	EGC31065	KYQ91635	EGG13327	EFA82487
OG0001838	EAL62923	EGC31616	KYQ91865	EGG21940	EFA82372
OG0001839	EAL62924	EGC29119	KYQ88505	EGG24292	EFA76410
OG0001840	EAL62926	EGC33805	KYQ91702	EGG23586	EFA81921
OG0001841	EAL62928	EGC32970	KYQ91716	EGG13302	EFA82102
OG0001842	EAL62930	EGC32985	KYQ91720	EGG13410	EFA75225
OG0001843	EAL62932	EGC28849	KYQ91620	EGG13326	EFA79365
OG0001844	EAS66834	EGC36812	KYR01520	EGG17031	EFA78232
OG0001845	EAL62937	EGC33943	KYQ89087	EGG22401	EFA86719
OG0001846	EAL62939	EGC33954	KYR02259	EGG21732	EFA76948
OG0001847	EAL62913	EGC33944	KYR00027	EGG23423	EFA85618
OG0001848	EAL62912	EGC30738	KYQ89817	EGG24967	EFA75365
OG0001849	EAL62889	EGC36817	KYQ89547	EGG18768	EFA80392
OG0001850	EAL62890	EGC36799	KYQ91002	EGG23421	EFA75040
OG0001851	EAL62892	EGC28904	KYQ91001	EGG23429	EFA75041
OG0001852	EAL62887	EGC33958	KYR00033	EGG18819	EFA75042
OG0001853	EAL62865	EGC33807	KYQ91700	EGG13289	EFA81911
OG0001854	EAL62869	EGC36790	KYQ89082	EGG25026	EFA79763
OG0001855	EAL62870	EGC36811	KYQ91406	EGG14220	EFA86748
OG0001856	EAL62875	EGC36809	KYQ89027	EGG24979	EFA76320
OG0001857	EAL62877	EGC36808	KYQ89840	EGG24980	EFA80179
OG0001858	EAL62878	EGC36806	KYQ89839	EGG20107	EFA81102
OG0001859	EAL62866	EGC36803	KYQ89843	EGG13950	EFA78234
OG0001860	EAL62882	EGC36801, EGC37497	KYQ89683		EFA77308
OG0001861	EAL62883	EGC32177	KYQ89678	EGG24879	EFA86488
OG0001862	EAL62857	EGC31068	KYQ89679	EGG24878	EFA86486
OG0001863	EAL62824	EGC38380	KYR00102	EGG17492	EFA86499
OG0001864	EAL62825	EGC38354	KYQ91972	EGG18906	EFA81592
OG0001865	EAL62833	EGC30428	KYQ89570	EGG18672	EFA79724
OG0001866	EAL62834	EGC30430	KYQ89568	EGG17109	EFA77832
OG0001867	EAL62835	EGC30422	KYQ94448	EGG17280	EFA84316
OG0001868	EAL62821	EGC32024	KYQ90257	EGG22708	EFA76905
OG0001869	EAL62841	EGC33186	KYR01305	EGG13726	EFA85640
OG0001870	EAL62842	EGC33175	KYR01303	EGG13725	EFA85639
OG0001871	EAL62855	EGC28833	KYQ91848	EGG18507	EFA86309
OG0001872	EAL62850	EGC33117	KYQ88491	EGG21518	EFA83986
OG0001873	EAL62851	EGC33128	KYQ88490	EGG21519	EFA83988
OG0001874	EAL62852	EGC29117	KYQ88341	EGG16495	EFA83902
OG0001875	EAL62822	EGC29118	KYQ93669	EGG17675	EFA85721
OG0001876	EAL62811	EGC29116	KYQ88508	EGG16491	EFA83905
OG0001877	EAL62816	EGC36818	KYQ89814	EGG23419	EFA75361
OG0001878	EEU04060	EGC38680	KYQ91187	EGG22394	EFA82263
OG0001879	EEU04061	EGC38709	KYQ91188	EGG24019	EFA74581
OG0001880	EEU04062	EGC38679	KYQ91189	EGG19452	EFA77660
OG0001881	EAL62789	EGC36391	KYR02048		EFA77350, EFA77922
OG0001882	EAL62785	EGC33721	KYQ99982	EGG13278	EFA80225
OG0001883	EAL62781	EGC28331	KYQ99983	EGG13266	EFA80213
OG0001884	EAL62749	EGC29214	KYR02937	EGG15083	EFA80958
OG0001885	EAL62754	EGC29215	KYQ93445	EGG15079	EFA82928
OG0001886	EAL62755	EGC31849	KYQ94268	EGG20795	EFA86270
OG0001887	EAL62756	EGC28590	KYQ91754	EGG13277	EFA80240
OG0001888	EAL62757	EGC28591	KYQ91755	EGG13275	EFA80241
OG0001889	EAL62758	EGC28592	KYQ91715	EGG13267	EFA80242
OG0001890	EAL62759	EGC39054	KYQ99967	EGG13282	EFA81920
OG0001891	EAL62776	EGC29034	KYQ91704	EGG13782	EFA81739
OG0001892	EAS66832	EGC28995	KYQ91790	EGG13408	EFA75226
OG0001893	EAL62752	EGC33304	KYQ91788	EGG13284	EFA84196
OG0001894	EAL62767	EGC39076	KYQ91723	EGG20028	EFA82150
OG0001895	EAL62779	EGC39051	KYQ88736	EGG22107	EFA81983
OG0001896	EAL62772	EGC39052	KYQ91694	EGG23667	EFA81100
OG0001897	EAL62725	EGC32500	KYQ89984	EGG17666	EFA80002
OG0001898	EAL62729, EDR41066	EGC29109, EGC31972, EGC37767
OG0001899	EAL62735	EGC36815	KYQ91654	EGG25399	EFA81738
OG0001900	EAL62737, EAL62738	EGC36816		EGG13394	EFA78848
OG0001901	EAL62742	EGC28907	KYQ91709	EGG13285	EFA86242
OG0001902	EAL62739	EGC32499	KYQ89267	EGG17170	EFA75950
OG0001903	EAL62721	EGC30952	KYQ93545	EGG14995	EFA83990
OG0001904	EAL62706	EGC32643	KYQ88271	EGG25200	EFA85828
OG0001905	EAL62711	EGC31693	KYQ91637	EGG13325	EFA82100
OG0001906	EAL62712	EGC31692	KYQ93205	EGG14138	EFA81839
OG0001907	EAL62719	EGC36552	KYQ93216	EGG19024	EFA81631
OG0001908	EAL62714	EGC33415	KYQ93217	EGG19025	EFA81630
OG0001909	EAL62715	EGC31684	KYQ93206	EGG14137	EFA85679
OG0001910	EAL62716	EGC29255	KYQ93215	EGG16179	EFA79639
OG0001911	EDR41039	EGC30423	KYQ88920	EGG25297	EFA83741
OG0001912	EDR41040	EGC33935	KYQ93219	EGG16236	EFA79637
OG0001913	EAL62673	EGC33934	KYQ93220	EGG24723	EFA76383
OG0001914	EAL62672	EGC32483	KYQ88919	EGG25298	EFA83742
OG0001915	EAL62681	EGC32498	KYQ88921	EGG17734	EFA81835
OG0001916	EAL62682	EGC32484	KYQ88922	EGG24924	EFA85677
OG0001917	EAL62702	EGC36309	KYQ89830	EGG13467	EFA84533
OG0001918	EAL62689	EGC36310	KYQ89829	EGG17938	EFA85563
OG0001919	EAL62699	EGC36293	KYQ89828	EGG13474	EFA82182
OG0001920	EAL62695	EGC28422		EGG14788	EFA76227, EFA81435
OG0001921	EAL62693	EGC28426	KYQ88450	EGG13371	EFA75863
OG0001922	EAL62701	EGC28424	KYQ88702	EGG15968	EFA75771
OG0001923	EAL62667	EGC30772	KYQ88701	EGG13372	EFA75910
OG0001924	EAL62668	EGC32967	KYQ93201	EGG13428	EFA75859
OG0001925	EAL62669	EGC32981	KYQ93202	EGG18201	EFA74513
OG0001926	EAL62671	EGC32966	KYQ93203	EGG13339	EFA79546
OG0001927	EAL62663	EGC36308	KYQ92009	EGG13487	EFA84536
OG0001928	EAL62664	EGC36291	KYQ88279	EGG13468	EFA83280
OG0001929	EAL62662	EGC30771	KYR01376	EGG13427	EFA84883
OG0001930	EAL62660	EGC30766	KYQ90015	EGG13362	EFA83322
OG0001931	EAL62655	EGC36307	KYR01374	EGG13370	EFA81449
OG0001932	EAL62650	EGC32237	KYQ88929	EGG23670	EFA82788
OG0001933	EAL62647	EGC32245	KYQ88928	EGG23668	EFA82787
OG0001934	EEU04051	EGC32244	KYQ90854	EGG17774	EFA84747
OG0001935	EAL62646	EGC30764	KYQ88263	EGG13938	EFA79545
OG0001936	EAL62645	EGC30763	KYQ88372	EGG13343	EFA74518
OG0001937	EAL62618	EGC32235	KYQ93224	EGG14145	EFA77138
OG0001938	EAL62623	EGC32265	KYQ88273	EGG16186	EFA79650
OG0001939	EAL62624	EGC32264	KYQ91497	EGG18119	EFA77870
OG0001940	EAL62628	EGC32272	KYQ93190	EGG20235	EFA76390
OG0001941	EAL62629	EGC32263	KYQ91576	EGG14234	EFA77102
OG0001942	EAL62630	EGC32271	KYQ91577	EGG14235	EFA77101
OG0001943	EAL62631	EGC32262	KYQ91501	EGG17797	EFA86824
OG0001944	EAL62640	EGC32270	KYQ91556	EGG21261	EFA86829
OG0001945	EAL62547	EGC34458	KYQ88718	EGG15873	EFA80913
OG0001946	EAL62549	EGC34471	KYR01932	EGG22365	EFA74969
OG0001947	EAL62544	EGC34459	KYQ91711	EGG13458	EFA85824
OG0001948	EAL62551	EGC34473	KYQ91710	EGG13530	EFA74970
OG0001949	EAL62559	EGC36300	KYQ89233	EGG17677	EFA86794
OG0001950	EAL62538	EGC36287	KYQ88705	EGG13423	EFA75915
OG0001951	EAL62561	EGC36306	KYQ88700	EGG13388	EFA75911
OG0001952	EAL62562	EGC36286	KYR01550	EGG13425	EFA85812
OG0001953	EAL62563	EGC36288	KYQ89036	EGG17858	EFA74971
OG0001954	EAL62545	EGC30951	KYQ89430	EGG13415	EFA86629
OG0001955	EAL62565	EGC30950	KYQ88247	EGG25201	EFA86545
OG0001956	EAL62567	EGC29250	KYQ88733	EGG15851	EFA78839
OG0001957	EAL62568	EGC32653	KYQ88375	EGG13754	EFA84703
OG0001958	EAL62569	EGC32641	KYQ88246	EGG18847	EFA79351
OG0001959	EAL62575	EGC34477	KYQ93242	EGG19973	EFA78864
OG0001960	EAL62577, EAL66386	EGC32364, EGC32365			EFA84665
OG0001961	EAL62578	EGC34460	KYQ93241	EGG13430	EFA75869
OG0001962	EAL62579	EGC34476	KYQ93200	EGG13429	EFA75868
OG0001963	EAL62586	EGC29712	KYQ93237	EGG16784	EFA80247
OG0001964	EAL62593	EGC39081	KYQ92010	EGG13416	EFA85818
OG0001965	EAL62597	EGC32231	KYQ92053	EGG24109	EFA75198
OG0001966	EAL62598	EGC32230	KYQ89268	EGG15835	EFA80981
OG0001967	EAL62542	EGC32242	KYQ89266	EGG13259	EFA82235
OG0001968	EAL62615	EGC34056	KYQ92015	EGG19045	EFA81731
OG0001969	EAL62514	EGC32269	KYQ88373	EGG19023	EFA81718
OG0001970	EAL62515	EGC32275	KYQ88378	EGG17318	EFA84623
OG0001971	EAL62530	EGC30451	KYQ91508	EGG16339	EFA86186
OG0001972	EAL62516	EGC32959	KYR01907	EGG21290	EFA75527
OG0001973	EEU04050	EGC29358	KYQ92191	EGG18979	EFA85759
OG0001974	EAL62458	EGC40030	KYQ93557	EGG20089	EFA82414
OG0001975	EAL62459	EGC40070	KYQ92260	EGG15084	EFA76507
OG0001976	EAL62496	EGC28992	KYQ92258	EGG17086	EFA80312
OG0001977	EAL62498	EGC40540	KYQ93326	EGG18596	EFA84071
OG0001978	EAL62499	EGC40596	KYQ92797	EGG18618	EFA82524
OG0001979	EAL62471, EAL62500	EGC31687, EGC40542	KYR00483
OG0001980	EAL62473	EGC33468	KYQ96934	EGG18205	EFA76147
OG0001981	EAL62452	EGC38084	KYQ92244	EGG21475	EFA79456
OG0001982	EAL62453	EGC33469	KYQ92238	EGG20133	EFA82416
OG0001983	EAL62502	EGC40549	KYQ92237	EGG20132	EFA82415
OG0001984	EAL62450	EGC28996	KYQ93226	EGG19204	EFA86771
OG0001985	EAL62474	EGC28993	KYQ93227	EGG19203	EFA86772
OG0001986	EAL62480	EGC29108	KYR00706	EGG22154	EFA82677
OG0001987	EAL62505	EGC34763	KYR02932	EGG13908	EFA85426
OG0001988	EAL62483	EGC34757	KYR02579	EGG23080	EFA77185
OG0001989	EAL62484	EGC34764	KYR02570	EGG23042	EFA77189
OG0001990	EAL62451	EGC37476	KYR02571	EGG23078	EFA77190
OG0001991	EAL62455	EGC35630	KYR02573	EGG19887	EFA77177
OG0001992	EAL62489	EGC35631	KYR00708	EGG15019	EFA79090
OG0001993	EAL62439	EGC32766	KYR00682	EGG15016	EFA79092
OG0001994	EAL62442	EGC35201	KYR03091	EGG18374	EFA74635
OG0001995	EAL62448	EGC29990	KYR02574	EGG19888	EFA77176
OG0001996	EAL62413	EGC30816	KYQ91473	EGG19340	EFA74528
OG0001997	EAL62417	EGC30814	KYQ94374	EGG20546	EFA75572
[truncated: 6,533 more rows]

## Sheet: TableS3.OrthogroupSizes
Table S3: Orthogroup size and genome contributions. Number of members from each species for each orthogroup.
Orthogroup	dd	dp	dl	df	pp	size
OG0000000	54	36	52	1	5	148
OG0000001	75	34	1	0	0	110
OG0000002	6	0	2	1	99	108
OG0000003	56	43	1	1	0	101
OG0000004	49	0	12	5	18	84
OG0000005	42	39	0	0	0	81
OG0000006	2	1	2	40	33	78
OG0000007	0	0	0	60	10	70
OG0000008	1	1	2	58	3	65
OG0000009	2	2	2	53	2	61
OG0000010	1	1	1	24	33	60
OG0000011	19	16	5	9	9	58
OG0000012	10	7	2	0	37	56
OG0000013	1	1	53	0	1	56
OG0000014	0	0	0	1	55	56
OG0000015	7	8	10	6	23	54
OG0000016	0	0	0	0	53	53
OG0000017	9	14	5	15	5	48
OG0000018	6	42	0	0	0	48
OG0000019	0	0	2	12	33	47
OG0000020	1	1	3	1	38	44
OG0000021	34	8	0	0	0	42
OG0000022	1	0	0	40	1	42
OG0000023	0	0	0	3	39	42
OG0000024	0	2	2	3	35	42
OG0000025	11	30	0	0	0	41
OG0000026	0	0	22	18	1	41
OG0000027	0	1	1	25	12	39
OG0000028	0	0	0	37	1	38
OG0000029	1	0	0	0	36	37
OG0000030	10	13	5	2	7	37
OG0000031	0	0	35	2	0	37
OG0000032	4	30	0	0	2	36
OG0000033	2	5	7	7	15	36
OG0000034	12	24	0	0	0	36
OG0000035	0	0	3	1	32	36
OG0000036	1	1	1	31	1	35
OG0000037	2	26	2	2	2	34
OG0000038	0	0	0	0	34	34
OG0000039	11	21	0	1	0	33
OG0000040	1	0	1	31	0	33
OG0000041	1	1	2	7	21	32
OG0000042	26	2	3	0	0	31
OG0000043	17	8	6	0	0	31
OG0000044	4	27	0	0	0	31
OG0000045	7	12	2	4	6	31
OG0000046	5	4	4	5	13	31
OG0000047	6	12	3	4	6	31
OG0000048	2	0	29	0	0	31
OG0000049	1	1	0	1	28	31
OG0000050	5	6	2	7	10	30
OG0000051	12	1	3	11	3	30
OG0000052	3	16	6	2	3	30
OG0000053	2	2	3	8	15	30
OG0000054	3	5	2	17	3	30
OG0000055	0	0	30	0	0	30
OG0000056	28	1	0	0	0	29
OG0000057	2	1	13	5	8	29
OG0000058	1	25	1	1	1	29
OG0000059	5	2	3	10	9	29
OG0000060	12	17	0	0	0	29
OG0000061	1	1	23	0	4	29
OG0000062	0	0	0	29	0	29
OG0000063	7	7	5	5	4	28
OG0000064	19	7	2	0	0	28
OG0000065	2	26	0	0	0	28
OG0000066	4	16	2	3	3	28
OG0000067	13	9	6	0	0	28
OG0000068	0	0	0	27	1	28
OG0000069	0	0	0	2	26	28
OG0000070	3	3	2	15	4	27
OG0000071	7	3	4	7	6	27
OG0000072	4	19	2	1	1	27
OG0000073	5	7	6	3	6	27
OG0000074	0	0	0	2	25	27
OG0000075	0	5	22	0	0	27
OG0000076	4	17	1	3	1	26
OG0000077	1	3	15	1	6	26
OG0000078	1	1	1	21	1	25
OG0000079	0	0	0	25	0	25
OG0000080	0	25	0	0	0	25
OG0000081	24	0	0	0	0	24
OG0000082	11	8	5	0	0	24
OG0000083	1	1	1	13	8	24
OG0000084	2	4	5	5	8	24
OG0000085	1	1	20	1	1	24
OG0000086	1	20	1	1	1	24
OG0000087	0	0	3	20	1	24
OG0000088	0	4	0	20	0	24
OG0000089	0	0	0	0	24	24
OG0000090	2	5	1	10	5	23
OG0000091	14	6	1	2	0	23
OG0000092	22	1	0	0	0	23
OG0000093	1	1	4	2	15	23
OG0000094	0	0	3	3	17	23
OG0000095	6	5	0	6	5	22
OG0000096	7	9	1	2	3	22
OG0000097	8	14	0	0	0	22
OG0000098	6	10	3	3	0	22
OG0000099	1	1	3	3	14	22
OG0000100	12	10	0	0	0	22
OG0000101	0	0	22	0	0	22
OG0000102	0	0	6	0	16	22
OG0000103	5	13	1	1	1	21
OG0000104	8	6	1	3	3	21
OG0000105	2	1	1	16	1	21
OG0000106	6	1	13	0	1	21
OG0000107	2	6	6	4	3	21
OG0000108	1	7	1	1	11	21
OG0000109	4	3	7	4	3	21
OG0000110	1	1	1	2	16	21
OG0000111	0	1	3	16	1	21
OG0000112	0	0	0	19	2	21
OG0000113	7	4	2	1	6	20
OG0000114	19	0	1	0	0	20
OG0000115	1	19	0	0	0	20
OG0000116	16	4	0	0	0	20
OG0000117	2	1	5	7	5	20
OG0000118	1	0	3	15	1	20
OG0000119	0	0	2	16	2	20
OG0000120	0	0	8	7	5	20
OG0000121	0	0	5	9	6	20
OG0000122	0	0	20	0	0	20
OG0000123	5	2	2	4	6	19
OG0000124	19	0	0	0	0	19
OG0000125	3	3	5	0	8	19
OG0000126	4	2	3	4	6	19
OG0000127	7	2	2	6	2	19
OG0000128	7	5	5	1	1	19
OG0000129	6	2	5	1	5	19
OG0000130	6	5	3	1	4	19
OG0000131	3	5	1	3	7	19
OG0000132	4	7	3	2	3	19
OG0000133	2	0	0	16	1	19
OG0000134	1	1	1	12	4	19
OG0000135	0	0	1	12	6	19
OG0000136	0	0	0	1	18	19
OG0000137	0	0	10	2	7	19
OG0000138	0	0	1	18	0	19
OG0000139	0	2	3	1	13	19
OG0000140	0	0	17	2	0	19
OG0000141	0	0	5	11	3	19
OG0000142	0	0	19	0	0	19
OG0000143	0	8	9	0	2	19
OG0000144	0	19	0	0	0	19
OG0000145	0	19	0	0	0	19
OG0000146	11	7	0	0	0	18
OG0000147	13	5	0	0	0	18
OG0000148	17	0	0	0	1	18
OG0000149	5	2	4	4	3	18
OG0000150	8	1	0	3	6	18
OG0000151	7	5	1	3	2	18
OG0000152	10	6	1	0	1	18
OG0000153	4	2	3	6	3	18
OG0000154	2	16	0	0	0	18
OG0000155	1	0	3	5	9	18
OG0000156	2	5	7	1	3	18
OG0000157	0	0	0	18	0	18
OG0000158	0	0	7	10	1	18
OG0000159	0	16	0	1	1	18
OG0000160	3	0	2	0	12	17
OG0000161	6	4	3	1	3	17
OG0000162	14	2	1	0	0	17
OG0000163	17	0	0	0	0	17
OG0000164	2	3	1	6	5	17
OG0000165	4	4	1	4	4	17
OG0000166	3	2	4	4	4	17
OG0000167	7	7	0	2	1	17
OG0000168	6	1	0	0	10	17
OG0000169	1	1	1	1	13	17
OG0000170	1	0	1	14	1	17
OG0000171	3	1	9	3	1	17
OG0000172	4	2	3	2	6	17
OG0000173	0	0	3	14	0	17
OG0000174	0	1	4	10	2	17
OG0000175	0	0	0	1	16	17
OG0000176	0	0	5	5	7	17
OG0000177	0	0	17	0	0	17
OG0000178	0	0	1	0	16	17
OG0000179	0	1	0	0	16	17
OG0000180	7	0	6	0	3	16
OG0000181	12	2	1	0	1	16
OG0000182	15	1	0	0	0	16
OG0000183	6	7	3	0	0	16
OG0000184	4	6	2	1	3	16
OG0000185	3	4	3	3	3	16
OG0000186	6	2	3	1	4	16
OG0000187	15	1	0	0	0	16
OG0000188	12	4	0	0	0	16
OG0000189	2	3	5	3	3	16
OG0000190	3	4	2	3	4	16
OG0000191	3	5	3	3	2	16
OG0000192	3	6	2	2	3	16
OG0000193	3	3	3	4	3	16
OG0000194	3	2	1	4	6	16
OG0000195	2	3	3	4	4	16
OG0000196	0	0	0	14	2	16
OG0000197	0	0	0	5	11	16
OG0000198	0	0	0	16	0	16
OG0000199	5	4	3	2	1	15
OG0000200	6	2	0	3	4	15
OG0000201	6	2	1	3	3	15
OG0000202	1	0	10	3	1	15
OG0000203	8	7	0	0	0	15
OG0000204	2	1	3	3	6	15
OG0000205	1	0	0	14	0	15
OG0000206	2	0	8	3	2	15
OG0000207	10	2	1	1	1	15
OG0000208	3	9	1	1	1	15
OG0000209	2	5	3	3	2	15
OG0000210	4	4	4	2	1	15
OG0000211	5	7	2	1	0	15
OG0000212	6	8	1	0	0	15
OG0000213	1	11	1	1	1	15
OG0000214	5	5	0	5	0	15
OG0000215	2	1	5	0	7	15
OG0000216	1	11	1	1	1	15
OG0000217	1	1	6	6	1	15
OG0000218	0	0	0	3	12	15
OG0000219	0	10	0	2	3	15
OG0000220	0	0	0	14	1	15
OG0000221	0	1	13	1	0	15
OG0000222	0	15	0	0	0	15
OG0000223	0	0	0	0	15	15
OG0000224	4	4	4	2	0	14
OG0000225	3	2	3	3	3	14
OG0000226	5	2	1	3	3	14
OG0000227	3	2	2	5	2	14
OG0000228	5	6	3	0	0	14
OG0000229	7	4	1	0	2	14
OG0000230	3	2	2	3	4	14
OG0000231	14	0	0	0	0	14
OG0000232	3	1	0	2	8	14
OG0000233	2	4	2	3	3	14
OG0000234	5	2	1	1	5	14
OG0000235	3	3	2	4	2	14
OG0000236	8	2	2	1	1	14
OG0000237	1	1	1	10	1	14
OG0000238	2	6	0	4	2	14
OG0000239	2	4	1	2	5	14
OG0000240	7	1	2	2	2	14
OG0000241	1	13	0	0	0	14
OG0000242	2	0	0	11	1	14
OG0000243	1	1	1	6	5	14
OG0000244	1	1	0	0	12	14
OG0000245	6	5	1	1	1	14
OG0000246	1	1	2	6	4	14
OG0000247	2	3	3	3	3	14
OG0000248	4	7	0	2	1	14
OG0000249	1	5	5	0	3	14
OG0000250	1	1	0	11	1	14
OG0000251	0	0	10	2	2	14
OG0000252	0	0	0	7	7	14
OG0000253	0	13	0	1	0	14
OG0000254	0	0	11	2	1	14
OG0000255	0	0	14	0	0	14
OG0000256	0	13	1	0	0	14
OG0000257	0	13	0	0	1	14
OG0000258	0	12	0	0	2	14
OG0000259	1	10	1	0	1	13
OG0000260	3	10	0	0	0	13
OG0000261	8	1	1	2	1	13
OG0000262	3	10	0	0	0	13
OG0000263	5	1	2	2	3	13
OG0000264	5	3	2	1	2	13
OG0000265	7	1	1	2	2	13
OG0000266	3	2	1	4	3	13
OG0000267	1	0	0	0	12	13
OG0000268	3	8	1	1	0	13
OG0000269	2	3	2	1	5	13
OG0000270	3	3	3	2	2	13
OG0000271	1	10	2	0	0	13
OG0000272	3	1	1	5	3	13
OG0000273	1	10	0	1	1	13
OG0000274	2	6	1	2	2	13
OG0000275	1	4	1	2	5	13
OG0000276	9	4	0	0	0	13
OG0000277	3	3	2	3	2	13
OG0000278	2	2	3	3	3	13
OG0000279	0	0	0	5	8	13
OG0000280	0	0	0	10	3	13
OG0000281	0	0	0	12	1	13
OG0000282	0	0	10	1	2	13
OG0000283	0	2	10	1	0	13
OG0000284	0	0	13	0	0	13
OG0000285	0	0	13	0	0	13
OG0000286	0	0	0	0	13	13
OG0000287	3	2	2	2	3	12
OG0000288	4	4	1	1	2	12
OG0000289	3	2	3	2	2	12
OG0000290	1	2	1	2	6	12
OG0000291	2	3	0	3	4	12
OG0000292	3	2	1	3	3	12
OG0000293	1	1	7	1	2	12
OG0000294	1	1	1	2	7	12
OG0000295	1	5	3	1	2	12
OG0000296	4	3	1	2	2	12
OG0000297	5	2	2	1	2	12
OG0000298	3	9	0	0	0	12
OG0000299	7	3	2	0	0	12
OG0000300	8	2	2	0	0	12
OG0000301	3	2	2	3	2	12
OG0000302	1	1	0	6	4	12
OG0000303	5	4	1	1	1	12
OG0000304	1	4	0	7	0	12
OG0000305	11	0	1	0	0	12
OG0000306	10	0	0	2	0	12
OG0000307	3	2	1	4	2	12
OG0000308	4	1	2	1	4	12
OG0000309	2	3	2	4	1	12
OG0000310	2	1	9	0	0	12
OG0000311	2	1	1	5	3	12
OG0000312	2	1	1	1	7	12
OG0000313	5	1	5	0	1	12
OG0000314	7	5	0	0	0	12
OG0000315	1	2	3	5	1	12
OG0000316	4	1	5	1	1	12
OG0000317	3	2	3	2	2	12
OG0000318	4	6	0	1	1	12
OG0000319	1	1	1	8	1	12
OG0000320	2	2	3	2	3	12
OG0000321	1	8	1	1	1	12
OG0000322	1	1	10	0	0	12
OG0000323	1	2	2	2	5	12
OG0000324	0	0	2	10	0	12
OG0000325	0	3	1	8	0	12
OG0000326	0	0	3	1	8	12
OG0000327	0	0	11	0	1	12
OG0000328	0	0	0	0	12	12
OG0000329	6	5	0	0	0	11
OG0000330	3	4	1	2	1	11
OG0000331	10	1	0	0	0	11
OG0000332	2	4	2	2	1	11
OG0000333	2	2	4	2	1	11
OG0000334	6	2	1	1	1	11
OG0000335	3	3	2	1	2	11
OG0000336	2	1	4	3	1	11
OG0000337	5	2	3	1	0	11
OG0000338	4	2	1	2	2	11
OG0000339	7	4	0	0	0	11
OG0000340	1	1	3	2	4	11
OG0000341	2	2	5	2	0	11
OG0000342	1	1	1	3	5	11
OG0000343	4	4	1	1	1	11
OG0000344	3	2	2	2	2	11
OG0000345	1	2	1	3	4	11
OG0000346	4	3	1	1	2	11
OG0000347	4	3	2	2	0	11
OG0000348	4	5	2	0	0	11
OG0000349	4	3	1	1	2	11
OG0000350	1	1	1	5	3	11
OG0000351	3	2	1	2	3	11
OG0000352	2	2	2	2	3	11
OG0000353	2	2	3	2	2	11
OG0000354	3	3	1	1	3	11
OG0000355	4	5	2	0	0	11
OG0000356	2	9	0	0	0	11
OG0000357	3	2	1	1	4	11
OG0000358	2	0	0	4	5	11
OG0000359	5	3	0	1	2	11
OG0000360	4	2	3	2	0	11
OG0000361	3	2	2	2	2	11
OG0000362	4	2	2	2	1	11
OG0000363	3	1	2	1	4	11
OG0000364	2	2	5	1	1	11
OG0000365	3	2	2	2	2	11
OG0000366	2	3	2	2	2	11
OG0000367	1	1	2	3	4	11
OG0000368	1	1	1	7	1	11
OG0000369	1	10	0	0	0	11
OG0000370	2	4	1	1	3	11
OG0000371	4	2	4	1	0	11
OG0000372	2	9	0	0	0	11
OG0000373	1	8	1	1	0	11
OG0000374	0	0	0	11	0	11
OG0000375	0	0	0	2	9	11
OG0000376	0	0	1	8	2	11
OG0000377	0	0	1	2	8	11
OG0000378	0	0	3	4	4	11
OG0000379	0	0	0	1	10	11
OG0000380	1	2	0	3	4	10
OG0000381	1	1	5	1	2	10
OG0000382	5	5	0	0	0	10
OG0000383	6	2	0	0	2	10
OG0000384	4	4	1	0	1	10
OG0000385	2	1	3	2	2	10
OG0000386	3	4	1	1	1	10
OG0000387	5	1	1	2	1	10
OG0000388	7	3	0	0	0	10
OG0000389	3	2	1	2	2	10
OG0000390	2	1	1	3	3	10
OG0000391	1	1	1	4	3	10
OG0000392	2	2	2	1	3	10
OG0000393	2	1	0	3	4	10
OG0000394	2	2	3	1	2	10
OG0000395	1	1	3	4	1	10
OG0000396	2	3	2	1	2	10
OG0000397	3	2	2	2	1	10
OG0000398	10	0	0	0	0	10
OG0000399	1	1	1	2	5	10
OG0000400	3	2	1	2	2	10
OG0000401	5	2	1	1	1	10
OG0000402	2	1	3	2	2	10
OG0000403	2	2	2	2	2	10
OG0000404	2	3	2	1	2	10
OG0000405	4	4	1	1	0	10
OG0000406	3	1	2	2	2	10
OG0000407	4	6	0	0	0	10
OG0000408	1	1	5	2	1	10
OG0000409	5	3	0	0	2	10
OG0000410	2	2	1	1	4	10
OG0000411	3	2	2	2	1	10
OG0000412	2	2	2	2	2	10
OG0000413	4	2	2	1	1	10
OG0000414	2	2	2	2	2	10
OG0000415	3	3	1	2	1	10
OG0000416	4	3	0	1	2	10
OG0000417	1	1	1	6	1	10
OG0000418	2	2	2	2	2	10
OG0000419	2	2	2	2	2	10
OG0000420	3	2	2	1	2	10
OG0000421	3	2	2	2	1	10
OG0000422	3	2	2	1	2	10
OG0000423	2	2	1	1	4	10
OG0000424	1	9	0	0	0	10
OG0000425	2	2	2	2	2	10
OG0000426	2	2	2	3	1	10
OG0000427	2	2	2	1	3	10
OG0000428	2	2	2	2	2	10
OG0000429	1	1	1	7	0	10
OG0000430	2	2	2	2	2	10
OG0000431	1	1	3	3	2	10
OG0000432	1	0	2	5	2	10
OG0000433	4	3	1	1	1	10
OG0000434	1	1	1	4	3	10
OG0000435	1	1	3	4	1	10
OG0000436	1	1	2	1	5	10
OG0000437	2	3	3	1	1	10
OG0000438	1	2	1	5	1	10
OG0000439	0	0	1	7	2	10
OG0000440	0	0	0	2	8	10
OG0000441	0	0	2	5	3	10
OG0000442	0	0	0	7	3	10
OG0000443	0	0	1	6	3	10
OG0000444	0	0	0	6	4	10
OG0000445	0	0	0	7	3	10
OG0000446	0	0	10	0	0	10
OG0000447	0	0	3	0	7	10
OG0000448	0	0	1	0	9	10
OG0000449	0	0	0	0	10	10
OG0000450	5	4	0	0	0	9
OG0000451	2	2	2	1	2	9
OG0000452	2	2	1	2	2	9
OG0000453	2	2	2	1	2	9
OG0000454	2	0	0	2	5	9
OG0000455	4	2	1	1	1	9
OG0000456	2	2	2	1	2	9
OG0000457	1	1	1	3	3	9
OG0000458	2	3	1	2	1	9
OG0000459	7	0	1	0	1	9
OG0000460	1	1	0	2	5	9
OG0000461	1	1	2	1	4	9
OG0000462	1	2	3	1	2	9
OG0000463	2	2	1	2	2	9
OG0000464	4	5	0	0	0	9
OG0000465	2	1	2	2	2	9
OG0000466	2	1	1	2	3	9
OG0000467	2	2	3	1	1	9
OG0000468	6	2	1	0	0	9
OG0000469	3	5	0	0	1	9
OG0000470	3	2	1	2	1	9
OG0000471	2	1	5	0	1	9
OG0000472	2	2	1	2	2	9
OG0000473	5	4	0	0	0	9
OG0000474	2	2	2	2	1	9
OG0000475	1	2	1	4	1	9
OG0000476	6	1	0	1	1	9
OG0000477	5	1	1	1	1	9
OG0000478	1	1	4	1	2	9
OG0000479	1	1	2	4	1	9
OG0000480	2	2	2	2	1	9
OG0000481	6	3	0	0	0	9
OG0000482	2	2	1	2	2	9
OG0000483	2	4	1	0	2	9
OG0000484	2	2	2	1	2	9
OG0000485	2	2	2	1	2	9
OG0000486	1	1	2	2	3	9
OG0000487	1	1	1	3	3	9
OG0000488	2	2	1	2	2	9
OG0000489	1	0	1	6	1	9
OG0000490	1	1	2	4	1	9
OG0000491	1	5	1	1	1	9
OG0000492	1	3	1	1	3	9
OG0000493	2	1	3	1	2	9
OG0000494	2	3	1	1	2	9
OG0000495	3	3	1	1	1	9
OG0000496	3	2	1	1	2	9
OG0000497	2	3	1	2	1	9
OG0000498	2	1	1	4	1	9
OG0000499	2	1	2	2	2	9
OG0000500	1	4	1	2	1	9
OG0000501	2	1	2	2	2	9
OG0000502	3	5	0	1	0	9
OG0000503	3	2	1	1	2	9
OG0000504	2	2	1	2	2	9
OG0000505	1	1	1	5	1	9
OG0000506	2	1	2	2	2	9
OG0000507	1	1	1	1	5	9
OG0000508	1	1	1	1	5	9
OG0000509	3	3	1	1	1	9
OG0000510	2	2	0	3	2	9
OG0000511	1	2	2	2	2	9
OG0000512	2	2	2	2	1	9
OG0000513	1	1	1	3	3	9
OG0000514	3	5	1	0	0	9
OG0000515	2	2	2	3	0	9
OG0000516	1	3	1	1	3	9
OG0000517	4	5	0	0	0	9
OG0000518	2	1	1	2	3	9
OG0000519	1	1	2	2	3	9
OG0000520	2	2	2	1	2	9
OG0000521	2	1	2	3	1	9
OG0000522	1	1	2	1	4	9
OG0000523	1	2	1	1	4	9
OG0000524	1	1	1	2	4	9
OG0000525	2	4	1	1	1	9
OG0000526	2	3	0	0	4	9
OG0000527	2	2	2	1	2	9
OG0000528	2	1	3	1	2	9
OG0000529	1	3	2	2	1	9
OG0000530	1	1	3	3	1	9
OG0000531	0	0	0	9	0	9
OG0000532	0	1	0	5	3	9
OG0000533	0	0	0	9	0	9
OG0000534	0	0	1	5	3	9
OG0000535	0	0	1	7	1	9
OG0000536	0	0	3	1	5	9
OG0000537	0	0	9	0	0	9
OG0000538	0	7	2	0	0	9
OG0000539	0	0	0	0	9	9
OG0000540	0	0	0	0	9	9
OG0000541	0	0	0	0	9	9
OG0000542	1	1	3	1	2	8
OG0000543	5	1	1	0	1	8
OG0000544	2	1	0	2	3	8
OG0000545	1	1	1	4	1	8
OG0000546	4	2	1	1	0	8
OG0000547	2	2	1	1	2	8
OG0000548	1	1	3	2	1	8
OG0000549	1	1	1	1	4	8
OG0000550	2	1	1	2	2	8
OG0000551	2	4	0	0	2	8
OG0000552	2	2	1	2	1	8
OG0000553	2	1	1	2	2	8
OG0000554	2	2	2	1	1	8
OG0000555	2	3	1	1	1	8
OG0000556	2	1	2	1	2	8
OG0000557	2	2	1	1	2	8
OG0000558	2	1	2	1	2	8
OG0000559	1	4	1	1	1	8
OG0000560	2	0	2	2	2	8
OG0000561	3	2	1	1	1	8
OG0000562	2	2	1	1	2	8
OG0000563	1	1	1	2	3	8
OG0000564	1	1	1	1	4	8
OG0000565	7	1	0	0	0	8
OG0000566	2	2	1	2	1	8
OG0000567	2	2	2	1	1	8
OG0000568	3	1	1	1	2	8
OG0000569	7	1	0	0	0	8
OG0000570	4	4	0	0	0	8
OG0000571	2	2	2	1	1	8
OG0000572	3	2	1	0	2	8
OG0000573	4	4	0	0	0	8
OG0000574	2	2	2	1	1	8
OG0000575	1	3	2	1	1	8
OG0000576	1	2	3	1	1	8
OG0000577	2	2	0	1	3	8
OG0000578	2	2	2	1	1	8
OG0000579	3	4	0	0	1	8
OG0000580	1	7	0	0	0	8
OG0000581	1	2	1	2	2	8
OG0000582	3	5	0	0	0	8
OG0000583	3	2	1	1	1	8
OG0000584	1	1	1	1	4	8
OG0000585	2	1	2	1	2	8
OG0000586	2	3	1	1	1	8
OG0000587	3	1	1	2	1	8
OG0000588	1	1	2	1	3	8
OG0000589	1	1	0	2	4	8
OG0000590	2	1	1	1	3	8
OG0000591	3	2	1	1	1	8
OG0000592	2	2	2	1	1	8
OG0000593	3	4	1	0	0	8
OG0000594	4	3	0	1	0	8
OG0000595	3	2	0	2	1	8
OG0000596	1	4	1	1	1	8
OG0000597	1	1	2	2	2	8
OG0000598	1	1	1	1	4	8
OG0000599	3	2	0	2	1	8
OG0000600	8	0	0	0	0	8
OG0000601	1	3	2	1	1	8
OG0000602	2	3	1	1	1	8
OG0000603	2	3	0	2	1	8
OG0000604	1	4	1	1	1	8
OG0000605	7	1	0	0	0	8
OG0000606	1	0	0	0	7	8
OG0000607	2	6	0	0	0	8
OG0000608	1	3	1	2	1	8
OG0000609	2	2	1	1	2	8
OG0000610	1	1	1	2	3	8
OG0000611	2	1	1	3	1	8
OG0000612	1	4	1	0	2	8
OG0000613	2	5	0	0	1	8
OG0000614	1	1	2	2	2	8
OG0000615	3	3	2	0	0	8
OG0000616	1	2	1	2	2	8
OG0000617	2	1	2	2	1	8
OG0000618	4	2	1	0	1	8
OG0000619	3	2	1	1	1	8
OG0000620	1	1	1	4	1	8
OG0000621	1	2	1	2	2	8
OG0000622	1	4	1	1	1	8
OG0000623	1	4	1	1	1	8
OG0000624	1	2	1	2	2	8
OG0000625	4	1	0	1	2	8
OG0000626	2	2	2	1	1	8
OG0000627	1	1	1	1	4	8
OG0000628	3	2	1	1	1	8
OG0000629	1	1	0	6	0	8
OG0000630	1	1	2	3	1	8
OG0000631	3	5	0	0	0	8
OG0000632	2	2	2	1	1	8
OG0000633	1	1	2	2	2	8
OG0000634	3	1	2	1	1	8
OG0000635	3	2	1	1	1	8
OG0000636	3	5	0	0	0	8
OG0000637	2	2	2	1	1	8
OG0000638	1	3	1	1	2	8
OG0000639	2	2	1	1	2	8
OG0000640	2	2	2	1	1	8
OG0000641	2	1	2	2	1	8
OG0000642	1	2	1	2	2	8
OG0000643	2	6	0	0	0	8
OG0000644	2	2	1	1	2	8
OG0000645	1	1	1	2	3	8
OG0000646	1	1	2	2	2	8
OG0000647	2	1	2	2	1	8
OG0000648	2	1	2	1	2	8
OG0000649	2	1	2	1	2	8
OG0000650	2	2	1	2	1	8
OG0000651	1	1	1	2	3	8
OG0000652	2	2	1	2	1	8
OG0000653	2	1	2	2	1	8
OG0000654	1	1	1	2	3	8
OG0000655	2	1	2	1	2	8
OG0000656	1	2	1	2	2	8
OG0000657	1	0	1	3	3	8
OG0000658	2	2	2	1	1	8
OG0000659	2	2	1	2	1	8
OG0000660	2	1	1	1	3	8
OG0000661	2	2	1	1	2	8
OG0000662	1	2	2	2	1	8
OG0000663	1	3	2	1	1	8
OG0000664	2	2	2	1	1	8
OG0000665	1	2	1	2	2	8
OG0000666	2	1	2	2	1	8
OG0000667	1	1	1	4	1	8
OG0000668	3	4	1	0	0	8
OG0000669	3	2	1	1	1	8
OG0000670	1	2	2	2	1	8
OG0000671	1	2	2	1	2	8
OG0000672	1	7	0	0	0	8
OG0000673	2	3	1	2	0	8
OG0000674	1	2	4	0	1	8
OG0000675	0	0	1	2	5	8
OG0000676	0	0	3	2	3	8
OG0000677	0	2	3	2	1	8
OG0000678	0	0	5	2	1	8
OG0000679	0	7	0	1	0	8
OG0000680	0	0	0	3	5	8
OG0000681	0	0	7	1	0	8
OG0000682	0	0	0	2	6	8
OG0000683	0	0	0	1	7	8
OG0000684	0	0	8	0	0	8
OG0000685	0	5	1	0	2	8
OG0000686	0	0	7	0	1	8
OG0000687	0	0	8	0	0	8
OG0000688	0	0	7	0	1	8
OG0000689	0	8	0	0	0	8
OG0000690	0	2	0	0	6	8
OG0000691	0	0	0	0	8	8
OG0000692	0	0	0	0	8	8
OG0000693	1	1	2	1	2	7
OG0000694	3	2	1	0	1	7
OG0000695	3	1	1	1	1	7
OG0000696	2	1	2	2	0	7
OG0000697	1	1	2	1	2	7
OG0000698	1	1	2	1	2	7
OG0000699	2	1	1	1	2	7
OG0000700	2	2	1	1	1	7
OG0000701	2	2	1	1	1	7
OG0000702	2	2	1	1	1	7
OG0000703	2	1	2	1	1	7
OG0000704	2	2	1	1	1	7
OG0000705	3	1	1	1	1	7
OG0000706	2	1	1	1	2	7
OG0000707	1	1	1	2	2	7
OG0000708	4	3	0	0	0	7
OG0000709	1	1	1	2	2	7
OG0000710	2	1	1	2	1	7
OG0000711	2	2	1	1	1	7
OG0000712	2	2	1	1	1	7
OG0000713	1	2	1	2	1	7
OG0000714	2	1	1	2	1	7
OG0000715	1	2	2	1	1	7
OG0000716	4	0	0	0	3	7
OG0000717	2	3	1	0	1	7
OG0000718	1	1	2	1	2	7
OG0000719	1	1	1	1	3	7
OG0000720	2	2	1	1	1	7
OG0000721	2	1	1	2	1	7
OG0000722	1	3	1	1	1	7
OG0000723	1	1	1	2	2	7
OG0000724	1	3	1	1	1	7
OG0000725	1	1	3	1	1	7
OG0000726	4	1	0	1	1	7
OG0000727	1	1	1	2	2	7
OG0000728	2	1	1	2	1	7
OG0000729	3	0	0	4	0	7
OG0000730	2	1	2	1	1	7
OG0000731	2	2	1	1	1	7
OG0000732	2	1	1	1	2	7
OG0000733	1	1	1	2	2	7
OG0000734	1	1	2	1	2	7
OG0000735	2	2	1	1	1	7
OG0000736	1	1	2	1	2	7
OG0000737	1	1	4	0	1	7
OG0000738	1	2	1	0	3	7
OG0000739	3	1	1	1	1	7
OG0000740	2	1	2	0	2	7
OG0000741	2	1	1	1	2	7
OG0000742	2	1	4	0	0	7
OG0000743	2	1	1	2	1	7
OG0000744	3	1	1	1	1	7
OG0000745	2	2	1	1	1	7
OG0000746	3	2	1	0	1	7
OG0000747	2	2	1	1	1	7
OG0000748	6	0	1	0	0	7
OG0000749	2	1	1	1	2	7
OG0000750	2	2	1	1	1	7
OG0000751	1	2	1	1	2	7
OG0000752	2	2	1	1	1	7
OG0000753	2	1	2	1	1	7
OG0000754	1	1	1	1	3	7
OG0000755	3	1	1	1	1	7
OG0000756	2	1	1	2	1	7
OG0000757	1	3	1	1	1	7
OG0000758	1	3	1	1	1	7
OG0000759	1	1	2	1	2	7
OG0000760	3	1	1	1	1	7
OG0000761	2	2	1	1	1	7
OG0000762	2	2	1	1	1	7
OG0000763	3	1	0	2	1	7
OG0000764	1	2	1	1	2	7
OG0000765	3	1	1	1	1	7
OG0000766	2	0	1	2	2	7
OG0000767	1	1	1	1	3	7
OG0000768	1	1	1	2	2	7
OG0000769	1	1	2	1	2	7
OG0000770	1	1	1	2	2	7
OG0000771	1	2	1	2	1	7
OG0000772	1	1	1	1	3	7
OG0000773	2	2	1	1	1	7
OG0000774	3	1	1	1	1	7
OG0000775	2	2	1	1	1	7
OG0000776	1	1	2	1	2	7
OG0000777	1	1	1	1	3	7
OG0000778	1	1	2	1	2	7
OG0000779	1	0	2	2	2	7
OG0000780	2	1	1	1	2	7
OG0000781	2	1	2	1	1	7
OG0000782	3	0	0	1	3	7
OG0000783	1	3	1	0	2	7
OG0000784	3	2	2	0	0	7
OG0000785	1	1	1	1	3	7
OG0000786	2	2	1	1	1	7
OG0000787	1	2	2	1	1	7
OG0000788	2	1	1	1	2	7
OG0000789	2	1	0	3	1	7
OG0000790	2	2	1	1	1	7
OG0000791	3	1	3	0	0	7
OG0000792	2	1	1	0	3	7
OG0000793	2	2	1	1	1	7
OG0000794	2	1	1	1	2	7
OG0000795	2	1	1	2	1	7
OG0000796	2	2	1	1	1	7
OG0000797	2	1	1	1	2	7
OG0000798	2	1	2	1	1	7
OG0000799	2	2	1	1	1	7
OG0000800	3	2	1	0	1	7
OG0000801	1	5	1	0	0	7
OG0000802	2	2	1	1	1	7
OG0000803	1	1	3	1	1	7
OG0000804	2	1	1	2	1	7
OG0000805	1	3	1	1	1	7
OG0000806	1	1	1	3	1	7
OG0000807	1	3	1	1	1	7
OG0000808	4	1	0	1	1	7
OG0000809	2	2	1	1	1	7
OG0000810	2	1	1	2	1	7
OG0000811	1	3	1	1	1	7
OG0000812	1	1	3	1	1	7
OG0000813	1	2	1	1	2	7
OG0000814	1	1	3	1	1	7
OG0000815	1	0	1	4	1	7
OG0000816	1	1	1	2	2	7
OG0000817	1	1	1	1	3	7
OG0000818	1	1	1	3	1	7
OG0000819	2	4	0	1	0	7
OG0000820	1	2	1	2	1	7
OG0000821	2	2	1	1	1	7
OG0000822	1	1	1	2	2	7
OG0000823	2	2	1	1	1	7
OG0000824	1	1	1	3	1	7
OG0000825	1	2	1	2	1	7
OG0000826	1	1	1	1	3	7
OG0000827	1	1	1	2	2	7
OG0000828	4	1	1	0	1	7
OG0000829	2	2	1	0	2	7
OG0000830	1	1	1	1	3	7
OG0000831	2	1	1	2	1	7
OG0000832	2	2	1	1	1	7
OG0000833	1	1	2	2	1	7
OG0000834	3	4	0	0	0	7
OG0000835	2	2	1	1	1	7
OG0000836	2	1	1	1	2	7
OG0000837	1	1	2	2	1	7
OG0000838	1	2	1	2	1	7
OG0000839	1	2	2	1	1	7
OG0000840	1	3	1	1	1	7
OG0000841	1	2	1	2	1	7
OG0000842	1	3	1	1	1	7
OG0000843	2	1	1	2	1	7
OG0000844	2	2	1	1	1	7
OG0000845	2	2	1	1	1	7
OG0000846	1	1	1	1	3	7
OG0000847	2	2	1	1	1	7
OG0000848	1	3	1	1	1	7
OG0000849	1	1	1	4	0	7
OG0000850	1	2	1	1	2	7
OG0000851	1	3	1	1	1	7
OG0000852	1	1	2	2	1	7
OG0000853	1	1	1	2	2	7
OG0000854	2	2	1	1	1	7
OG0000855	1	6	0	0	0	7
OG0000856	2	1	1	2	1	7
OG0000857	1	2	1	2	1	7
OG0000858	2	4	0	0	1	7
OG0000859	3	1	1	1	1	7
OG0000860	1	1	1	1	3	7
OG0000861	2	2	1	1	1	7
OG0000862	1	2	1	2	1	7
OG0000863	1	2	1	1	2	7
OG0000864	1	1	2	1	2	7
OG0000865	1	1	2	1	2	7
OG0000866	1	1	3	1	1	7
OG0000867	1	1	2	2	1	7
OG0000868	1	2	1	1	2	7
OG0000869	1	1	1	2	2	7
OG0000870	1	2	1	2	1	7
OG0000871	1	3	1	1	1	7
OG0000872	1	1	1	1	3	7
OG0000873	1	1	2	2	1	7
OG0000874	1	1	3	1	1	7
OG0000875	0	1	3	2	1	7
OG0000876	0	0	0	7	0	7
OG0000877	0	0	3	3	1	7
OG0000878	0	0	0	6	1	7
OG0000879	0	0	0	7	0	7
OG0000880	0	0	0	1	6	7
OG0000881	0	0	0	7	0	7
OG0000882	0	0	1	6	0	7
OG0000883	0	0	0	7	0	7
OG0000884	0	0	0	7	0	7
OG0000885	0	0	6	1	0	7
OG0000886	0	0	0	7	0	7
OG0000887	0	0	0	1	6	7
OG0000888	0	0	2	1	4	7
OG0000889	0	0	6	1	0	7
OG0000890	0	0	7	0	0	7
OG0000891	0	0	3	0	4	7
OG0000892	0	0	7	0	0	7
OG0000893	0	7	0	0	0	7
OG0000894	0	0	0	0	7	7
OG0000895	1	1	1	1	2	6
OG0000896	1	1	1	1	2	6
OG0000897	5	0	1	0	0	6
OG0000898	2	1	1	1	1	6
OG0000899	1	1	1	1	2	6
OG0000900	1	1	1	2	1	6
OG0000901	2	1	1	1	1	6
OG0000902	1	1	2	1	1	6
OG0000903	1	1	1	1	2	6
OG0000904	1	1	1	2	1	6
OG0000905	1	0	2	1	2	6
OG0000906	1	2	1	1	1	6
OG0000907	1	1	1	1	2	6
OG0000908	1	1	1	1	2	6
OG0000909	1	2	1	1	1	6
OG0000910	2	1	1	1	1	6
OG0000911	1	1	0	1	3	6
OG0000912	2	1	1	1	1	6
OG0000913	2	3	1	0	0	6
OG0000914	1	1	1	1	2	6
OG0000915	1	1	1	1	2	6
OG0000916	2	1	1	1	1	6
OG0000917	1	1	1	2	1	6
OG0000918	1	1	1	1	2	6
OG0000919	1	2	1	1	1	6
OG0000920	2	1	1	1	1	6
OG0000921	1	1	2	1	1	6
OG0000922	2	1	1	1	1	6
OG0000923	1	1	1	2	1	6
OG0000924	3	2	1	0	0	6
OG0000925	1	1	1	1	2	6
OG0000926	1	2	1	1	1	6
OG0000927	2	2	2	0	0	6
OG0000928	1	2	1	1	1	6
OG0000929	1	1	2	1	1	6
OG0000930	1	2	1	1	1	6
OG0000931	1	1	2	1	1	6
OG0000932	1	2	1	1	1	6
OG0000933	1	2	1	1	1	6
OG0000934	1	2	1	1	1	6
OG0000935	1	1	2	1	1	6
OG0000936	1	1	1	2	1	6
OG0000937	1	2	1	1	1	6
OG0000938	1	0	2	2	1	6
OG0000939	1	1	1	2	1	6
OG0000940	1	2	1	1	1	6
OG0000941	2	1	1	1	1	6
OG0000942	1	1	2	1	1	6
OG0000943	1	1	2	1	1	6
OG0000944	1	1	1	2	1	6
OG0000945	1	1	1	1	2	6
OG0000946	1	1	1	1	2	6
OG0000947	1	2	1	1	1	6
OG0000948	1	1	1	2	1	6
OG0000949	1	2	1	1	1	6
OG0000950	1	1	1	1	2	6
OG0000951	1	1	1	2	1	6
OG0000952	2	3	1	0	0	6
OG0000953	1	1	1	2	1	6
OG0000954	1	1	2	1	1	6
OG0000955	1	2	1	1	1	6
OG0000956	2	2	1	1	0	6
OG0000957	2	3	0	1	0	6
OG0000958	1	2	1	1	1	6
OG0000959	1	2	1	1	1	6
OG0000960	1	1	2	1	1	6
OG0000961	1	1	1	1	2	6
OG0000962	2	1	1	1	1	6
OG0000963	2	1	1	1	1	6
OG0000964	1	1	1	1	2	6
OG0000965	2	1	1	1	1	6
OG0000966	1	1	2	1	1	6
OG0000967	2	1	1	1	1	6
OG0000968	3	1	2	0	0	6
OG0000969	1	1	1	1	2	6
OG0000970	1	1	2	1	1	6
OG0000971	2	1	1	1	1	6
OG0000972	2	1	1	1	1	6
OG0000973	1	2	1	1	1	6
OG0000974	1	1	2	1	1	6
OG0000975	1	1	1	2	1	6
OG0000976	2	1	1	1	1	6
OG0000977	1	1	1	2	1	6
OG0000978	2	4	0	0	0	6
OG0000979	1	1	1	1	2	6
OG0000980	1	1	1	1	2	6
OG0000981	1	1	1	1	2	6
OG0000982	1	1	1	1	2	6
OG0000983	2	1	1	1	1	6
OG0000984	1	2	1	1	1	6
OG0000985	1	2	1	1	1	6
OG0000986	1	1	0	1	3	6
OG0000987	1	1	2	1	1	6
OG0000988	3	2	1	0	0	6
OG0000989	2	1	1	1	1	6
OG0000990	1	1	1	2	1	6
OG0000991	1	1	1	2	1	6
OG0000992	1	1	1	2	1	6
OG0000993	1	1	1	1	2	6
OG0000994	1	1	1	1	2	6
OG0000995	2	2	1	1	0	6
OG0000996	1	1	2	1	1	6
OG0000997	1	2	1	1	1	6
OG0000998	1	2	1	1	1	6
OG0000999	1	1	1	2	1	6
OG0001000	1	1	1	2	1	6
OG0001001	1	1	1	1	2	6
OG0001002	2	1	2	0	1	6
OG0001003	1	1	0	4	0	6
OG0001004	1	2	1	1	1	6
OG0001005	3	3	0	0	0	6
OG0001006	1	2	1	1	1	6
OG0001007	1	1	1	1	2	6
OG0001008	2	1	1	1	1	6
OG0001009	1	1	1	2	1	6
OG0001010	1	1	1	2	1	6
OG0001011	2	1	1	1	1	6
OG0001012	1	1	3	0	1	6
OG0001013	2	1	1	1	1	6
OG0001014	1	1	1	2	1	6
OG0001015	4	2	0	0	0	6
OG0001016	1	1	2	1	1	6
OG0001017	3	1	1	1	0	6
OG0001018	2	2	1	0	1	6
OG0001019	1	1	1	2	1	6
OG0001020	2	4	0	0	0	6
OG0001021	1	2	1	1	1	6
OG0001022	2	1	1	1	1	6
OG0001023	1	1	1	1	2	6
OG0001024	1	1	1	1	2	6
OG0001025	2	1	1	1	1	6
OG0001026	2	1	1	1	1	6
OG0001027	1	1	1	2	1	6
OG0001028	1	1	1	1	2	6
OG0001029	1	1	1	1	2	6
OG0001030	2	1	1	1	1	6
OG0001031	1	1	1	1	2	6
OG0001032	2	1	1	1	1	6
OG0001033	1	1	1	2	1	6
OG0001034	2	1	1	1	1	6
OG0001035	2	1	1	1	1	6
OG0001036	2	3	1	0	0	6
OG0001037	1	1	1	1	2	6
OG0001038	1	1	1	2	1	6
OG0001039	1	1	1	2	1	6
OG0001040	2	1	1	1	1	6
OG0001041	1	1	1	2	1	6
OG0001042	1	1	1	2	1	6
OG0001043	1	1	1	2	1	6
OG0001044	1	1	2	1	1	6
OG0001045	1	1	1	1	2	6
OG0001046	1	1	1	1	2	6
OG0001047	1	2	1	1	1	6
OG0001048	1	1	1	1	2	6
OG0001049	1	1	1	2	1	6
OG0001050	1	2	1	1	1	6
OG0001051	1	1	3	1	0	6
OG0001052	1	1	1	2	1	6
OG0001053	3	2	0	1	0	6
OG0001054	2	1	1	1	1	6
OG0001055	2	0	1	2	1	6
OG0001056	1	2	1	1	1	6
OG0001057	2	1	1	1	1	6
OG0001058	2	1	0	1	2	6
OG0001059	2	3	0	0	1	6
OG0001060	1	3	1	1	0	6
OG0001061	1	2	1	1	1	6
OG0001062	1	2	1	1	1	6
OG0001063	1	1	2	2	0	6
OG0001064	1	2	1	1	1	6
OG0001065	1	2	1	1	1	6
OG0001066	2	1	1	1	1	6
OG0001067	2	1	1	1	1	6
OG0001068	1	1	1	1	2	6
OG0001069	1	1	1	2	1	6
OG0001070	1	1	1	2	1	6
OG0001071	2	1	1	1	1	6
OG0001072	2	1	1	1	1	6
OG0001073	1	1	1	1	2	6
OG0001074	1	1	1	2	1	6
OG0001075	1	1	1	1	2	6
OG0001076	1	2	1	1	1	6
OG0001077	1	1	1	1	2	6
OG0001078	1	1	1	2	1	6
OG0001079	1	1	1	1	2	6
OG0001080	1	1	1	1	2	6
OG0001081	2	1	1	1	1	6
OG0001082	2	1	1	1	1	6
OG0001083	1	2	1	1	1	6
OG0001084	1	1	1	1	2	6
OG0001085	2	1	1	1	1	6
OG0001086	2	1	1	1	1	6
OG0001087	1	1	2	1	1	6
OG0001088	1	2	1	1	1	6
OG0001089	1	1	2	1	1	6
OG0001090	1	1	1	1	2	6
OG0001091	1	1	1	2	1	6
OG0001092	1	1	1	1	2	6
OG0001093	1	1	1	2	1	6
OG0001094	4	0	1	0	1	6
OG0001095	2	1	1	1	1	6
OG0001096	1	1	1	2	1	6
OG0001097	1	1	1	2	1	6
OG0001098	3	2	0	0	1	6
OG0001099	1	1	1	2	1	6
OG0001100	1	1	1	1	2	6
OG0001101	1	0	5	0	0	6
OG0001102	1	2	1	1	1	6
OG0001103	1	1	1	2	1	6
OG0001104	1	1	1	2	1	6
OG0001105	2	1	1	1	1	6
OG0001106	1	2	1	1	1	6
OG0001107	1	1	1	2	1	6
OG0001108	1	2	1	1	1	6
OG0001109	1	1	2	1	1	6
OG0001110	1	1	2	1	1	6
OG0001111	4	1	1	0	0	6
OG0001112	1	1	1	2	1	6
OG0001113	1	1	1	2	1	6
OG0001114	1	2	1	1	1	6
OG0001115	1	1	1	1	2	6
OG0001116	1	1	1	1	2	6
OG0001117	1	2	1	1	1	6
OG0001118	1	1	1	1	2	6
OG0001119	2	1	1	1	1	6
OG0001120	1	1	2	1	1	6
OG0001121	2	1	1	1	1	6
OG0001122	2	1	1	1	1	6
OG0001123	2	1	1	1	1	6
OG0001124	2	1	1	1	1	6
OG0001125	2	1	1	1	1	6
OG0001126	2	1	1	1	1	6
OG0001127	2	1	1	1	1	6
OG0001128	2	1	1	1	1	6
OG0001129	2	1	1	1	1	6
OG0001130	2	1	1	1	1	6
OG0001131	2	1	1	1	1	6
OG0001132	2	1	1	1	1	6
OG0001133	2	1	1	1	1	6
OG0001134	4	2	0	0	0	6
OG0001135	2	1	1	1	1	6
OG0001136	2	1	1	1	1	6
OG0001137	2	1	1	1	1	6
OG0001138	2	1	1	1	1	6
OG0001139	2	1	1	1	1	6
OG0001140	2	1	1	1	1	6
OG0001141	2	1	1	1	1	6
OG0001142	2	1	1	1	1	6
OG0001143	2	1	1	1	1	6
OG0001144	2	1	1	1	1	6
OG0001145	2	1	1	1	1	6
OG0001146	2	1	1	1	1	6
OG0001147	2	1	1	1	1	6
OG0001148	2	1	1	0	2	6
OG0001149	2	1	1	1	1	6
OG0001150	2	1	1	1	1	6
OG0001151	2	1	1	1	1	6
OG0001152	2	1	1	1	1	6
OG0001153	2	1	1	1	1	6
OG0001154	2	1	1	1	1	6
OG0001155	2	1	1	1	1	6
OG0001156	2	1	1	1	1	6
OG0001157	2	1	1	1	1	6
OG0001158	2	1	1	1	1	6
OG0001159	2	1	1	1	1	6
OG0001160	2	1	1	1	1	6
OG0001161	2	1	1	1	1	6
OG0001162	2	1	1	1	1	6
OG0001163	2	1	1	1	1	6
OG0001164	2	1	1	1	1	6
OG0001165	2	1	1	1	1	6
OG0001166	2	1	1	1	1	6
OG0001167	2	1	1	1	1	6
OG0001168	2	1	1	1	1	6
OG0001169	2	1	1	1	1	6
OG0001170	2	1	1	1	1	6
OG0001171	2	1	1	1	1	6
OG0001172	2	1	1	1	1	6
OG0001173	2	1	1	1	1	6
OG0001174	2	1	1	1	1	6
OG0001175	2	1	1	1	1	6
OG0001176	2	1	1	1	1	6
OG0001177	2	1	1	1	1	6
OG0001178	2	1	1	1	1	6
OG0001179	2	1	1	1	1	6
OG0001180	4	1	0	1	0	6
OG0001181	2	1	1	1	1	6
OG0001182	2	1	1	1	1	6
OG0001183	2	1	1	1	1	6
OG0001184	2	1	1	1	1	6
OG0001185	2	1	1	1	1	6
OG0001186	2	1	1	1	1	6
OG0001187	2	1	1	1	1	6
OG0001188	2	1	1	1	1	6
OG0001189	2	1	1	1	1	6
OG0001190	2	1	1	1	1	6
OG0001191	2	1	1	1	1	6
OG0001192	2	1	1	1	1	6
OG0001193	2	1	1	1	1	6
OG0001194	2	1	1	1	1	6
OG0001195	2	1	1	1	1	6
OG0001196	1	2	1	1	1	6
OG0001197	1	2	1	1	1	6
OG0001198	1	1	1	2	1	6
OG0001199	2	1	1	1	1	6
OG0001200	2	1	1	1	1	6
OG0001201	2	1	1	1	1	6
OG0001202	1	3	2	0	0	6
OG0001203	1	1	2	1	1	6
OG0001204	1	1	1	2	1	6
OG0001205	1	1	1	1	2	6
OG0001206	1	2	1	1	1	6
OG0001207	1	1	1	1	2	6
OG0001208	1	1	1	1	2	6
OG0001209	1	1	1	1	2	6
OG0001210	1	1	1	1	2	6
OG0001211	2	1	1	1	1	6
OG0001212	1	2	1	1	1	6
OG0001213	2	1	1	1	1	6
OG0001214	3	1	0	1	1	6
OG0001215	1	2	1	1	1	6
OG0001216	1	2	2	0	1	6
OG0001217	1	1	1	1	2	6
OG0001218	1	2	1	1	1	6
OG0001219	1	2	1	1	1	6
OG0001220	1	2	1	1	1	6
OG0001221	2	1	1	1	1	6
OG0001222	1	2	1	1	1	6
OG0001223	2	1	1	1	1	6
OG0001224	1	1	1	2	1	6
OG0001225	2	1	1	1	1	6
OG0001226	1	1	1	1	2	6
OG0001227	1	2	1	1	1	6
OG0001228	1	1	1	2	1	6
OG0001229	1	1	2	1	1	6
OG0001230	1	1	1	1	2	6
OG0001231	1	2	0	3	0	6
OG0001232	1	1	2	1	1	6
OG0001233	1	1	1	1	2	6
OG0001234	1	2	1	1	1	6
OG0001235	2	2	2	0	0	6
OG0001236	1	1	2	1	1	6
OG0001237	1	1	1	1	2	6
OG0001238	2	1	1	1	1	6
OG0001239	1	1	1	3	0	6
OG0001240	2	1	1	1	1	6
OG0001241	1	2	1	1	1	6
OG0001242	1	1	1	1	2	6
OG0001243	1	3	1	0	1	6
OG0001244	1	1	1	2	1	6
OG0001245	2	1	1	1	1	6
OG0001246	2	1	1	1	1	6
OG0001247	1	1	2	1	1	6
OG0001248	1	2	1	1	1	6
OG0001249	1	1	1	1	2	6
OG0001250	1	1	1	1	2	6
OG0001251	1	1	1	2	1	6
OG0001252	1	1	2	1	1	6
OG0001253	1	1	1	2	1	6
OG0001254	1	1	1	1	2	6
OG0001255	1	1	1	1	2	6
OG0001256	1	2	1	1	1	6
OG0001257	1	1	2	1	1	6
OG0001258	1	1	1	1	2	6
OG0001259	1	1	1	1	2	6
OG0001260	1	1	2	1	1	6
OG0001261	1	2	1	1	1	6
OG0001262	1	2	1	1	1	6
OG0001263	1	2	1	1	1	6
OG0001264	1	0	0	0	5	6
OG0001265	2	1	1	1	1	6
OG0001266	1	2	1	1	1	6
OG0001267	2	1	1	1	1	6
OG0001268	2	1	1	1	1	6
OG0001269	1	1	1	2	1	6
OG0001270	1	1	1	1	2	6
OG0001271	1	1	1	2	1	6
OG0001272	1	1	1	2	1	6
OG0001273	1	1	2	1	1	6
OG0001274	1	1	1	1	2	6
OG0001275	2	1	1	1	1	6
OG0001276	1	1	1	2	1	6
OG0001277	4	2	0	0	0	6
OG0001278	1	1	1	2	1	6
OG0001279	1	1	2	1	1	6
OG0001280	1	1	1	1	2	6
OG0001281	1	1	0	4	0	6
OG0001282	1	1	1	1	2	6
OG0001283	1	1	2	1	1	6
OG0001284	1	2	1	1	1	6
OG0001285	3	0	0	3	0	6
OG0001286	1	1	1	1	2	6
OG0001287	1	1	1	1	2	6
OG0001288	2	2	1	1	0	6
OG0001289	1	2	1	1	1	6
OG0001290	2	1	2	0	1	6
OG0001291	1	2	1	1	1	6
OG0001292	1	2	1	1	1	6
OG0001293	1	1	2	1	1	6
OG0001294	2	1	1	1	1	6
OG0001295	1	1	1	2	1	6
OG0001296	1	2	1	1	1	6
OG0001297	1	2	1	1	1	6
OG0001298	1	2	1	1	1	6
OG0001299	1	1	1	1	2	6
OG0001300	1	2	1	1	1	6
OG0001301	1	1	1	2	1	6
OG0001302	1	2	1	1	1	6
OG0001303	1	1	1	2	1	6
OG0001304	1	1	1	1	2	6
OG0001305	1	2	1	1	1	6
OG0001306	1	1	1	1	2	6
OG0001307	1	1	1	1	2	6
OG0001308	1	1	2	1	1	6
OG0001309	1	1	1	2	1	6
OG0001310	2	1	1	1	1	6
OG0001311	1	1	1	1	2	6
OG0001312	1	1	1	2	1	6
OG0001313	1	0	2	1	2	6
OG0001314	2	1	1	1	1	6
OG0001315	1	2	1	1	1	6
OG0001316	1	2	1	1	1	6
OG0001317	1	1	1	1	2	6
OG0001318	1	1	1	2	1	6
OG0001319	1	1	1	2	1	6
OG0001320	1	1	1	1	2	6
OG0001321	1	2	1	1	1	6
OG0001322	1	1	1	1	2	6
OG0001323	1	1	1	1	2	6
OG0001324	1	2	1	1	1	6
OG0001325	2	1	1	1	1	6
OG0001326	2	1	1	1	1	6
OG0001327	1	1	1	2	1	6
OG0001328	1	2	1	1	1	6
OG0001329	2	1	1	1	1	6
OG0001330	1	1	2	1	1	6
OG0001331	1	0	1	3	1	6
OG0001332	1	2	1	1	1	6
OG0001333	1	1	1	2	1	6
OG0001334	2	1	1	1	1	6
OG0001335	1	2	1	1	1	6
OG0001336	1	1	1	1	2	6
OG0001337	1	2	1	1	1	6
OG0001338	1	1	1	1	2	6
OG0001339	1	1	0	2	2	6
OG0001340	1	1	1	2	1	6
OG0001341	1	1	1	2	1	6
OG0001342	1	1	2	1	1	6
OG0001343	1	1	1	2	1	6
OG0001344	1	1	1	1	2	6
OG0001345	1	1	1	1	2	6
OG0001346	1	1	1	1	2	6
OG0001347	1	1	2	1	1	6
OG0001348	1	1	2	1	1	6
OG0001349	1	2	1	1	1	6
OG0001350	1	1	2	1	1	6
OG0001351	1	0	1	1	3	6
OG0001352	1	1	2	1	1	6
OG0001353	1	2	1	1	1	6
OG0001354	1	1	1	2	1	6
OG0001355	2	1	1	1	1	6
OG0001356	1	1	1	1	2	6
OG0001357	1	1	1	1	2	6
OG0001358	1	1	2	1	1	6
OG0001359	1	1	2	1	1	6
OG0001360	1	1	0	1	3	6
OG0001361	1	1	1	2	1	6
OG0001362	1	1	1	2	1	6
OG0001363	1	0	1	1	3	6
OG0001364	1	1	1	1	2	6
OG0001365	1	1	1	2	1	6
OG0001366	1	1	1	1	2	6
OG0001367	1	1	1	1	2	6
OG0001368	1	1	1	2	1	6
OG0001369	1	1	1	1	2	6
OG0001370	1	1	1	1	2	6
OG0001371	1	1	2	1	1	6
OG0001372	2	1	1	1	1	6
OG0001373	1	2	1	1	1	6
OG0001374	2	1	1	1	1	6
OG0001375	1	1	1	2	1	6
OG0001376	1	1	2	1	1	6
OG0001377	1	1	1	2	1	6
OG0001378	1	1	1	2	1	6
OG0001379	1	1	1	2	1	6
OG0001380	1	1	1	2	1	6
OG0001381	1	1	1	1	2	6
OG0001382	1	2	1	1	1	6
OG0001383	1	1	2	1	1	6
OG0001384	1	1	1	2	1	6
OG0001385	2	1	1	1	1	6
OG0001386	1	1	1	1	2	6
OG0001387	1	2	1	1	1	6
OG0001388	1	1	1	2	1	6
OG0001389	1	1	2	1	1	6
OG0001390	1	1	1	2	1	6
OG0001391	1	2	1	1	1	6
OG0001392	2	2	0	1	1	6
OG0001393	1	2	1	1	1	6
OG0001394	1	1	1	2	1	6
OG0001395	1	2	1	1	1	6
OG0001396	1	2	1	1	1	6
OG0001397	1	1	2	1	1	6
OG0001398	1	1	1	2	1	6
OG0001399	2	1	1	1	1	6
OG0001400	1	1	1	1	2	6
OG0001401	1	2	1	1	1	6
OG0001402	1	1	2	1	1	6
OG0001403	1	1	1	2	1	6
OG0001404	1	1	2	1	1	6
OG0001405	1	1	1	1	2	6
OG0001406	1	1	1	1	2	6
OG0001407	1	0	1	3	1	6
OG0001408	1	2	1	1	1	6
OG0001409	1	2	1	1	1	6
OG0001410	2	0	1	2	1	6
OG0001411	1	1	1	1	2	6
OG0001412	1	1	2	1	1	6
OG0001413	1	1	1	1	2	6
OG0001414	1	1	1	2	1	6
OG0001415	1	2	1	1	1	6
OG0001416	1	1	3	0	1	6
OG0001417	0	3	1	1	1	6
OG0001418	0	0	0	6	0	6
OG0001419	0	0	0	5	1	6
OG0001420	0	0	1	4	1	6
OG0001421	0	0	4	2	0	6
OG0001422	0	2	0	1	3	6
OG0001423	0	0	3	1	2	6
OG0001424	0	0	3	1	2	6
OG0001425	0	0	0	6	0	6
OG0001426	0	0	0	2	4	6
OG0001427	0	0	2	4	0	6
OG0001428	0	0	0	5	1	6
OG0001429	0	0	3	3	0	6
OG0001430	0	0	0	6	0	6
OG0001431	0	0	1	1	4	6
OG0001432	0	0	1	2	3	6
OG0001433	0	0	0	6	0	6
OG0001434	0	0	5	1	0	6
OG0001435	0	0	0	1	5	6
OG0001436	0	2	1	1	2	6
OG0001437	0	0	3	0	3	6
OG0001438	0	0	6	0	0	6
OG0001439	0	0	6	0	0	6
OG0001440	0	0	4	0	2	6
OG0001441	0	0	0	0	6	6
OG0001442	0	0	0	0	6	6
OG0001443	1	1	1	1	1	5
OG0001444	1	1	1	1	1	5
OG0001445	1	1	1	1	1	5
OG0001446	1	1	1	1	1	5
OG0001447	1	1	1	1	1	5
OG0001448	1	0	2	1	1	5
OG0001449	1	1	1	1	1	5
OG0001450	1	1	1	1	1	5
OG0001451	1	1	1	1	1	5
OG0001452	1	1	1	1	1	5
OG0001453	1	1	1	1	1	5
OG0001454	1	1	1	1	1	5
OG0001455	1	1	1	1	1	5
OG0001456	1	1	1	1	1	5
OG0001457	1	1	1	1	1	5
OG0001458	1	1	1	1	1	5
OG0001459	1	1	1	1	1	5
OG0001460	1	1	1	1	1	5
OG0001461	2	1	1	0	1	5
OG0001462	1	1	1	1	1	5
OG0001463	1	1	1	1	1	5
OG0001464	1	1	1	1	1	5
OG0001465	1	1	1	1	1	5
OG0001466	1	1	1	1	1	5
OG0001467	1	2	0	1	1	5
OG0001468	1	1	1	1	1	5
OG0001469	1	1	1	1	1	5
OG0001470	1	1	1	1	1	5
OG0001471	1	1	1	1	1	5
OG0001472	1	1	1	1	1	5
OG0001473	1	1	1	1	1	5
OG0001474	1	1	1	1	1	5
OG0001475	1	1	1	1	1	5
OG0001476	1	1	1	1	1	5
OG0001477	2	2	0	0	1	5
OG0001478	1	1	1	1	1	5
OG0001479	1	1	1	1	1	5
OG0001480	1	1	1	1	1	5
OG0001481	1	1	1	1	1	5
OG0001482	1	1	1	1	1	5
OG0001483	1	1	1	1	1	5
OG0001484	1	1	1	1	1	5
OG0001485	1	1	1	1	1	5
OG0001486	1	1	1	1	1	5
OG0001487	1	1	1	1	1	5
OG0001488	1	1	1	1	1	5
OG0001489	1	1	1	1	1	5
OG0001490	1	1	1	1	1	5
OG0001491	1	1	1	1	1	5
OG0001492	1	1	1	1	1	5
OG0001493	1	1	1	1	1	5
OG0001494	1	1	1	1	1	5
OG0001495	1	1	1	1	1	5
OG0001496	1	1	1	1	1	5
OG0001497	1	1	1	1	1	5
OG0001498	1	1	1	1	1	5
OG0001499	1	1	1	1	1	5
OG0001500	1	1	1	1	1	5
OG0001501	1	1	1	1	1	5
OG0001502	1	1	1	1	1	5
OG0001503	1	1	1	1	1	5
OG0001504	1	1	1	1	1	5
OG0001505	1	1	1	1	1	5
OG0001506	1	1	1	1	1	5
OG0001507	1	1	1	1	1	5
OG0001508	1	1	1	1	1	5
OG0001509	1	1	1	1	1	5
OG0001510	1	1	1	1	1	5
OG0001511	1	1	1	1	1	5
OG0001512	1	1	1	1	1	5
OG0001513	1	1	1	1	1	5
OG0001514	1	1	1	1	1	5
OG0001515	1	1	1	1	1	5
OG0001516	1	1	1	1	1	5
OG0001517	1	1	1	1	1	5
OG0001518	1	1	1	1	1	5
OG0001519	1	1	1	1	1	5
OG0001520	1	1	1	1	1	5
OG0001521	1	1	1	1	1	5
OG0001522	1	1	1	1	1	5
OG0001523	1	1	1	1	1	5
OG0001524	1	1	1	1	1	5
OG0001525	1	1	1	1	1	5
OG0001526	1	1	1	1	1	5
OG0001527	1	1	1	1	1	5
OG0001528	1	1	1	1	1	5
OG0001529	1	1	1	1	1	5
OG0001530	2	1	0	0	2	5
OG0001531	1	1	1	1	1	5
OG0001532	1	1	1	1	1	5
OG0001533	1	1	1	1	1	5
OG0001534	1	1	1	1	1	5
OG0001535	1	1	1	1	1	5
OG0001536	1	1	1	1	1	5
OG0001537	1	1	1	1	1	5
OG0001538	1	1	1	1	1	5
OG0001539	1	1	1	1	1	5
OG0001540	1	1	1	1	1	5
OG0001541	1	1	1	1	1	5
OG0001542	1	1	1	1	1	5
OG0001543	1	1	1	1	1	5
OG0001544	1	1	1	1	1	5
OG0001545	1	1	1	1	1	5
OG0001546	1	1	1	1	1	5
OG0001547	1	1	1	1	1	5
OG0001548	1	1	1	1	1	5
OG0001549	1	1	1	1	1	5
OG0001550	1	1	1	1	1	5
OG0001551	1	1	0	2	1	5
OG0001552	1	1	1	1	1	5
OG0001553	2	1	1	1	0	5
OG0001554	1	1	1	1	1	5
OG0001555	1	1	1	1	1	5
OG0001556	1	1	1	1	1	5
OG0001557	1	1	1	1	1	5
OG0001558	1	1	1	1	1	5
OG0001559	1	1	1	1	1	5
OG0001560	1	1	1	1	1	5
OG0001561	1	1	1	1	1	5
OG0001562	1	1	1	1	1	5
OG0001563	1	1	1	1	1	5
OG0001564	1	1	1	1	1	5
OG0001565	1	1	1	1	1	5
OG0001566	1	1	1	1	1	5
OG0001567	1	1	1	1	1	5
OG0001568	1	1	1	1	1	5
OG0001569	1	1	1	1	1	5
OG0001570	1	1	1	1	1	5
OG0001571	1	1	1	1	1	5
OG0001572	1	1	1	1	1	5
OG0001573	1	1	1	1	1	5
OG0001574	1	1	1	1	1	5
OG0001575	1	1	1	1	1	5
OG0001576	1	1	1	1	1	5
OG0001577	1	1	1	1	1	5
OG0001578	1	1	1	1	1	5
OG0001579	1	1	1	1	1	5
OG0001580	1	1	1	1	1	5
OG0001581	1	1	1	1	1	5
OG0001582	1	1	1	1	1	5
OG0001583	1	1	1	1	1	5
OG0001584	1	1	1	1	1	5
OG0001585	1	1	1	1	1	5
OG0001586	1	1	1	1	1	5
OG0001587	1	1	1	1	1	5
OG0001588	1	1	1	1	1	5
OG0001589	1	1	1	0	2	5
OG0001590	1	1	1	1	1	5
OG0001591	1	1	1	1	1	5
OG0001592	1	1	1	1	1	5
OG0001593	1	1	1	1	1	5
OG0001594	1	1	1	1	1	5
OG0001595	1	1	1	1	1	5
OG0001596	1	1	1	1	1	5
OG0001597	1	1	1	1	1	5
OG0001598	1	1	1	1	1	5
OG0001599	1	1	1	1	1	5
OG0001600	1	1	1	1	1	5
OG0001601	1	1	1	1	1	5
OG0001602	1	1	1	1	1	5
OG0001603	1	1	1	1	1	5
OG0001604	1	1	1	1	1	5
OG0001605	1	1	1	1	1	5
OG0001606	1	1	1	1	1	5
OG0001607	1	1	1	1	1	5
OG0001608	1	1	1	1	1	5
OG0001609	1	1	1	1	1	5
OG0001610	1	1	1	1	1	5
OG0001611	1	1	1	1	1	5
OG0001612	1	1	1	1	1	5
OG0001613	1	1	1	1	1	5
OG0001614	1	1	1	1	1	5
OG0001615	1	1	1	1	1	5
OG0001616	1	1	1	1	1	5
OG0001617	1	1	1	1	1	5
OG0001618	1	1	1	1	1	5
OG0001619	1	1	1	1	1	5
OG0001620	1	1	1	1	1	5
OG0001621	1	1	1	1	1	5
OG0001622	1	1	1	1	1	5
OG0001623	1	1	1	1	1	5
OG0001624	1	1	1	1	1	5
OG0001625	1	1	1	1	1	5
OG0001626	1	1	1	1	1	5
OG0001627	1	1	1	1	1	5
OG0001628	1	1	1	1	1	5
OG0001629	1	1	1	1	1	5
OG0001630	1	1	1	1	1	5
OG0001631	1	1	1	1	1	5
OG0001632	1	1	1	1	1	5
OG0001633	1	1	1	1	1	5
OG0001634	1	0	1	2	1	5
OG0001635	1	1	1	1	1	5
OG0001636	1	1	1	1	1	5
OG0001637	1	1	1	1	1	5
OG0001638	1	1	1	1	1	5
OG0001639	1	1	1	1	1	5
OG0001640	1	1	1	1	1	5
OG0001641	1	1	1	1	1	5
OG0001642	1	1	1	1	1	5
OG0001643	1	1	1	1	1	5
OG0001644	1	1	1	1	1	5
OG0001645	1	1	1	1	1	5
OG0001646	2	1	1	1	0	5
OG0001647	2	0	3	0	0	5
OG0001648	1	1	1	1	1	5
OG0001649	1	1	1	1	1	5
OG0001650	1	1	1	1	1	5
OG0001651	1	1	1	1	1	5
OG0001652	1	1	1	1	1	5
OG0001653	1	1	1	1	1	5
OG0001654	1	1	1	1	1	5
OG0001655	1	1	1	1	1	5
OG0001656	1	1	1	1	1	5
OG0001657	1	0	1	1	2	5
OG0001658	1	1	1	1	1	5
OG0001659	1	1	1	1	1	5
OG0001660	1	1	1	1	1	5
OG0001661	1	1	1	1	1	5
OG0001662	1	1	1	1	1	5
OG0001663	1	1	1	1	1	5
OG0001664	1	1	1	1	1	5
OG0001665	1	1	1	1	1	5
OG0001666	1	1	1	1	1	5
OG0001667	1	1	1	1	1	5
OG0001668	1	1	1	1	1	5
OG0001669	1	1	1	1	1	5
OG0001670	1	1	1	1	1	5
OG0001671	1	1	1	1	1	5
OG0001672	1	1	1	1	1	5
OG0001673	1	1	1	1	1	5
OG0001674	1	1	1	1	1	5
OG0001675	1	1	1	1	1	5
OG0001676	1	1	1	1	1	5
OG0001677	1	1	1	1	1	5
OG0001678	1	1	1	1	1	5
OG0001679	1	1	1	1	1	5
OG0001680	1	1	1	1	1	5
OG0001681	1	1	1	1	1	5
OG0001682	1	1	1	1	1	5
OG0001683	1	1	1	1	1	5
OG0001684	1	1	1	1	1	5
OG0001685	1	1	1	1	1	5
OG0001686	1	1	1	1	1	5
OG0001687	1	1	1	1	1	5
OG0001688	1	1	1	1	1	5
OG0001689	1	1	1	1	1	5
OG0001690	1	1	1	1	1	5
OG0001691	1	1	1	1	1	5
OG0001692	1	1	1	1	1	5
OG0001693	1	1	1	1	1	5
OG0001694	1	1	1	1	1	5
OG0001695	1	1	1	1	1	5
OG0001696	1	1	1	1	1	5
OG0001697	1	1	1	1	1	5
OG0001698	1	1	1	1	1	5
OG0001699	1	1	1	1	1	5
OG0001700	1	1	1	1	1	5
OG0001701	1	1	1	1	1	5
OG0001702	1	1	1	1	1	5
OG0001703	1	1	1	1	1	5
OG0001704	1	1	1	1	1	5
OG0001705	1	2	0	2	0	5
OG0001706	1	1	1	1	1	5
OG0001707	1	1	1	1	1	5
OG0001708	1	1	1	1	1	5
OG0001709	1	1	1	1	1	5
OG0001710	1	1	1	1	1	5
OG0001711	1	1	1	1	1	5
OG0001712	1	1	1	1	1	5
OG0001713	1	1	1	1	1	5
OG0001714	1	1	1	1	1	5
OG0001715	1	1	1	1	1	5
OG0001716	1	1	1	1	1	5
OG0001717	1	1	1	1	1	5
OG0001718	1	1	1	1	1	5
OG0001719	1	1	1	1	1	5
OG0001720	1	1	1	1	1	5
OG0001721	1	1	1	1	1	5
OG0001722	1	2	1	0	1	5
OG0001723	1	1	1	1	1	5
OG0001724	1	1	1	1	1	5
OG0001725	1	1	1	1	1	5
OG0001726	1	1	1	1	1	5
OG0001727	1	1	1	1	1	5
OG0001728	1	1	1	1	1	5
OG0001729	1	1	1	1	1	5
OG0001730	1	1	1	1	1	5
OG0001731	1	1	1	1	1	5
OG0001732	1	1	1	1	1	5
OG0001733	1	1	1	1	1	5
OG0001734	1	1	1	1	1	5
OG0001735	1	1	1	1	1	5
OG0001736	1	1	1	1	1	5
OG0001737	1	1	1	1	1	5
OG0001738	1	1	1	1	1	5
OG0001739	1	1	1	1	1	5
OG0001740	1	1	1	1	1	5
OG0001741	1	1	1	1	1	5
OG0001742	1	1	1	1	1	5
OG0001743	1	1	1	1	1	5
OG0001744	1	1	1	1	1	5
OG0001745	1	1	1	1	1	5
OG0001746	1	1	1	1	1	5
OG0001747	1	1	1	1	1	5
OG0001748	1	1	1	1	1	5
OG0001749	1	1	1	1	1	5
OG0001750	1	1	1	1	1	5
OG0001751	1	1	1	1	1	5
OG0001752	1	1	1	1	1	5
OG0001753	1	1	1	1	1	5
OG0001754	1	1	1	1	1	5
OG0001755	1	1	1	1	1	5
OG0001756	1	1	1	1	1	5
OG0001757	1	1	1	1	1	5
OG0001758	1	1	1	1	1	5
OG0001759	1	1	1	1	1	5
OG0001760	1	1	1	1	1	5
OG0001761	1	1	1	1	1	5
OG0001762	1	4	0	0	0	5
OG0001763	1	1	1	1	1	5
OG0001764	1	1	1	1	1	5
OG0001765	1	1	1	1	1	5
OG0001766	1	1	1	1	1	5
OG0001767	1	1	1	1	1	5
OG0001768	1	1	1	1	1	5
OG0001769	1	1	1	1	1	5
OG0001770	1	1	1	1	1	5
OG0001771	1	1	1	1	1	5
OG0001772	1	1	1	1	1	5
OG0001773	1	1	1	1	1	5
OG0001774	1	1	1	1	1	5
OG0001775	1	1	1	1	1	5
OG0001776	1	1	1	1	1	5
OG0001777	1	1	1	1	1	5
OG0001778	1	1	1	1	1	5
OG0001779	1	1	1	1	1	5
OG0001780	1	1	1	1	1	5
OG0001781	1	1	1	1	1	5
OG0001782	1	1	1	1	1	5
OG0001783	1	1	1	1	1	5
OG0001784	1	1	1	1	1	5
OG0001785	1	1	1	1	1	5
OG0001786	1	1	1	1	1	5
OG0001787	1	1	1	1	1	5
OG0001788	1	1	1	1	1	5
OG0001789	1	1	1	1	1	5
OG0001790	1	1	1	1	1	5
OG0001791	1	1	1	1	1	5
OG0001792	1	1	1	1	1	5
OG0001793	1	1	1	1	1	5
OG0001794	1	1	1	1	1	5
OG0001795	1	1	1	1	1	5
OG0001796	1	1	1	1	1	5
OG0001797	1	1	1	1	1	5
OG0001798	1	1	1	1	1	5
OG0001799	1	1	1	1	1	5
OG0001800	1	1	1	1	1	5
OG0001801	1	1	1	1	1	5
OG0001802	1	1	1	1	1	5
OG0001803	1	1	1	1	1	5
OG0001804	3	2	0	0	0	5
OG0001805	1	1	1	1	1	5
OG0001806	1	1	1	1	1	5
OG0001807	1	1	1	1	1	5
OG0001808	1	1	1	1	1	5
OG0001809	1	1	1	1	1	5
OG0001810	1	1	1	1	1	5
OG0001811	1	1	1	1	1	5
OG0001812	1	3	0	1	0	5
OG0001813	1	1	1	1	1	5
OG0001814	1	1	1	1	1	5
OG0001815	1	1	1	1	1	5
OG0001816	1	1	1	1	1	5
OG0001817	1	1	1	1	1	5
OG0001818	1	1	1	1	1	5
OG0001819	1	1	1	1	1	5
OG0001820	1	1	1	1	1	5
OG0001821	1	1	1	1	1	5
OG0001822	1	1	1	1	1	5
OG0001823	1	1	1	1	1	5
OG0001824	1	1	1	1	1	5
OG0001825	1	1	1	1	1	5
OG0001826	1	1	1	1	1	5
OG0001827	1	1	1	1	1	5
OG0001828	1	1	1	1	1	5
OG0001829	1	1	1	1	1	5
OG0001830	1	1	1	1	1	5
OG0001831	1	1	1	1	1	5
OG0001832	1	1	1	1	1	5
OG0001833	1	1	1	1	1	5
OG0001834	1	1	1	1	1	5
OG0001835	1	1	1	1	1	5
OG0001836	1	1	1	1	1	5
OG0001837	1	1	1	1	1	5
OG0001838	1	1	1	1	1	5
OG0001839	1	1	1	1	1	5
OG0001840	1	1	1	1	1	5
OG0001841	1	1	1	1	1	5
OG0001842	1	1	1	1	1	5
OG0001843	1	1	1	1	1	5
OG0001844	1	1	1	1	1	5
OG0001845	1	1	1	1	1	5
OG0001846	1	1	1	1	1	5
OG0001847	1	1	1	1	1	5
OG0001848	1	1	1	1	1	5
OG0001849	1	1	1	1	1	5
OG0001850	1	1	1	1	1	5
OG0001851	1	1	1	1	1	5
OG0001852	1	1	1	1	1	5
OG0001853	1	1	1	1	1	5
OG0001854	1	1	1	1	1	5
OG0001855	1	1	1	1	1	5
OG0001856	1	1	1	1	1	5
OG0001857	1	1	1	1	1	5
OG0001858	1	1	1	1	1	5
OG0001859	1	1	1	1	1	5
OG0001860	1	2	1	0	1	5
OG0001861	1	1	1	1	1	5
OG0001862	1	1	1	1	1	5
OG0001863	1	1	1	1	1	5
OG0001864	1	1	1	1	1	5
OG0001865	1	1	1	1	1	5
OG0001866	1	1	1	1	1	5
OG0001867	1	1	1	1	1	5
OG0001868	1	1	1	1	1	5
OG0001869	1	1	1	1	1	5
OG0001870	1	1	1	1	1	5
OG0001871	1	1	1	1	1	5
OG0001872	1	1	1	1	1	5
OG0001873	1	1	1	1	1	5
OG0001874	1	1	1	1	1	5
OG0001875	1	1	1	1	1	5
OG0001876	1	1	1	1	1	5
OG0001877	1	1	1	1	1	5
OG0001878	1	1	1	1	1	5
OG0001879	1	1	1	1	1	5
OG0001880	1	1	1	1	1	5
OG0001881	1	1	1	0	2	5
OG0001882	1	1	1	1	1	5
OG0001883	1	1	1	1	1	5
OG0001884	1	1	1	1	1	5
OG0001885	1	1	1	1	1	5
OG0001886	1	1	1	1	1	5
OG0001887	1	1	1	1	1	5
OG0001888	1	1	1	1	1	5
OG0001889	1	1	1	1	1	5
OG0001890	1	1	1	1	1	5
OG0001891	1	1	1	1	1	5
OG0001892	1	1	1	1	1	5
OG0001893	1	1	1	1	1	5
OG0001894	1	1	1	1	1	5
OG0001895	1	1	1	1	1	5
OG0001896	1	1	1	1	1	5
OG0001897	1	1	1	1	1	5
OG0001898	2	3	0	0	0	5
OG0001899	1	1	1	1	1	5
OG0001900	2	1	0	1	1	5
OG0001901	1	1	1	1	1	5
OG0001902	1	1	1	1	1	5
OG0001903	1	1	1	1	1	5
OG0001904	1	1	1	1	1	5
OG0001905	1	1	1	1	1	5
OG0001906	1	1	1	1	1	5
OG0001907	1	1	1	1	1	5
OG0001908	1	1	1	1	1	5
OG0001909	1	1	1	1	1	5
OG0001910	1	1	1	1	1	5
OG0001911	1	1	1	1	1	5
OG0001912	1	1	1	1	1	5
OG0001913	1	1	1	1	1	5
OG0001914	1	1	1	1	1	5
OG0001915	1	1	1	1	1	5
OG0001916	1	1	1	1	1	5
OG0001917	1	1	1	1	1	5
OG0001918	1	1	1	1	1	5
OG0001919	1	1	1	1	1	5
OG0001920	1	1	0	1	2	5
OG0001921	1	1	1	1	1	5
OG0001922	1	1	1	1	1	5
OG0001923	1	1	1	1	1	5
OG0001924	1	1	1	1	1	5
OG0001925	1	1	1	1	1	5
OG0001926	1	1	1	1	1	5
OG0001927	1	1	1	1	1	5
OG0001928	1	1	1	1	1	5
OG0001929	1	1	1	1	1	5
OG0001930	1	1	1	1	1	5
OG0001931	1	1	1	1	1	5
OG0001932	1	1	1	1	1	5
OG0001933	1	1	1	1	1	5
OG0001934	1	1	1	1	1	5
OG0001935	1	1	1	1	1	5
OG0001936	1	1	1	1	1	5
OG0001937	1	1	1	1	1	5
OG0001938	1	1	1	1	1	5
OG0001939	1	1	1	1	1	5
OG0001940	1	1	1	1	1	5
OG0001941	1	1	1	1	1	5
OG0001942	1	1	1	1	1	5
OG0001943	1	1	1	1	1	5
OG0001944	1	1	1	1	1	5
OG0001945	1	1	1	1	1	5
OG0001946	1	1	1	1	1	5
OG0001947	1	1	1	1	1	5
OG0001948	1	1	1	1	1	5
OG0001949	1	1	1	1	1	5
OG0001950	1	1	1	1	1	5
OG0001951	1	1	1	1	1	5
OG0001952	1	1	1	1	1	5
OG0001953	1	1	1	1	1	5
OG0001954	1	1	1	1	1	5
OG0001955	1	1	1	1	1	5
OG0001956	1	1	1	1	1	5
OG0001957	1	1	1	1	1	5
OG0001958	1	1	1	1	1	5
OG0001959	1	1	1	1	1	5
OG0001960	2	2	0	0	1	5
OG0001961	1	1	1	1	1	5
OG0001962	1	1	1	1	1	5
OG0001963	1	1	1	1	1	5
OG0001964	1	1	1	1	1	5
OG0001965	1	1	1	1	1	5
OG0001966	1	1	1	1	1	5
OG0001967	1	1	1	1	1	5
OG0001968	1	1	1	1	1	5
OG0001969	1	1	1	1	1	5
OG0001970	1	1	1	1	1	5
OG0001971	1	1	1	1	1	5
OG0001972	1	1	1	1	1	5
OG0001973	1	1	1	1	1	5
OG0001974	1	1	1	1	1	5
OG0001975	1	1	1	1	1	5
OG0001976	1	1	1	1	1	5
OG0001977	1	1	1	1	1	5
OG0001978	1	1	1	1	1	5
OG0001979	2	2	1	0	0	5
OG0001980	1	1	1	1	1	5
OG0001981	1	1	1	1	1	5
OG0001982	1	1	1	1	1	5
OG0001983	1	1	1	1	1	5
OG0001984	1	1	1	1	1	5
OG0001985	1	1	1	1	1	5
OG0001986	1	1	1	1	1	5
OG0001987	1	1	1	1	1	5
OG0001988	1	1	1	1	1	5
OG0001989	1	1	1	1	1	5
OG0001990	1	1	1	1	1	5
OG0001991	1	1	1	1	1	5
OG0001992	1	1	1	1	1	5
OG0001993	1	1	1	1	1	5
OG0001994	1	1	1	1	1	5
OG0001995	1	1	1	1	1	5
OG0001996	1	1	1	1	1	5
OG0001997	1	1	1	1	1	5
[truncated: 6,533 more rows]

## Sheet: TableS4.StagesExpressed
Table S4. Average number of stages in which genes are expressed. Gene expression across five developmental stages was assessed based on expression thresholds of 0 TPM and 1 TPM.
	Average number of stages expressed above 0 TPM
	shared singleton	shared paralog	lineage-specific gene	lineage-specific expansion
total	4.96773	4.62187	4.34069	4.50049
dd	4.92471	4.26725	3.71856	3.75371
dp	4.96034	4.53224	3.95342	3.96519
df	4.99424	4.94118	4.91005	4.93565
dl	4.99278	4.90909	4.84935	4.8908
pp	4.97148	4.76458	4.58781	4.71605
	Average number of stages expressed above 1 TPM
	shared singleton	shared paralog	lineage-specific gene	lineage-specific expansion
total	4.73323	3.88211	3.52301	3.51783
dd	4.35751	3.19389	2.54378	2.26855
dp	4.6818	3.60346	2.86277	2.6747
df	4.95819	4.6841	4.54393	4.38202
dl	4.90596	4.47993	4.28186	4.27457
pp	4.80942	4.10226	3.87421	3.65147

## Sheet: TableS5.BiasedGenes
Table S5. Biased genes. The genes in the top 5% of expression specificity (tau) are shown, with the average expression (TPM) across stages, the expression level and stage in which it is highest expressed (biased), the gene category, and the FDR corrected p-value resulting from the branch-site model for positive selection (for paralogs - LSEs and shared paralogs).
Orthogroup	gene ID	transcript ID	species	tau	average	maximum	max_stage	category	selection FDR
OG0000001	DDB_G0279871	EAL67492	dd	0.91	1.8	6.59	0h	lineage-specific expansion	NA
OG0000002	PPL_10411	EFA76194	pp	0.95	93.25	387.89	8h	lineage-specific expansion	NA
OG0000004	DDB_G0268508	EAL73707	dd	1	1.07	5.36	20h	lineage-specific expansion	NA
OG0000004	DDB_G0276979	EAL68991	dd	0.91	3.01	11.17	8h	lineage-specific expansion	NA
OG0000004	DDB_G0293818	EAL60542	dd	0.9	0.35	1.25	8h	lineage-specific expansion	NA
OG0000007	DFA_09357	EGG16327	df	0.8	1.51	4.19	8h	lineage-specific expansion	NA
OG0000009	DFA_09619	EGG15948	df	0.83	2.29	6.76	24h	lineage-specific expansion	NA
OG0000009	DFA_09620	EGG15949	df	0.83	2.45	7.36	24h	lineage-specific expansion	NA
OG0000014	PPL_09891	EFA77136	pp	0.91	23.68	87.4	0h	lineage-specific expansion	NA
OG0000015	PPL_00871	EFA85642	pp	0.97	72.94	324.61	0h	lineage-specific expansion	0.00154074
OG0000015	PPL_03058	EFA83985	pp	0.95	2.87	11.81	0h	lineage-specific expansion	1
OG0000015	PPL_06004	EFA81167	pp	0.92	11.7	43.98	0h	lineage-specific expansion	0.0117715
OG0000015	PPL_07385	EFA79694	pp	0.93	96.1	379.23	0h	lineage-specific expansion	0.00282375
OG0000015	PPL_09115	EFA78463	pp	0.95	6.41	26.37	0h	lineage-specific expansion	1
OG0000015	PPL_10987	EFA75483	pp	0.92	21.98	84.42	0h	lineage-specific expansion	5.49844e-05
OG0000019	PPL_02076	EFA85079	pp	0.98	51.27	234.75	0h	lineage-specific expansion	NA
OG0000019	PPL_05872	EFA81037	pp	1	33.07	162.76	0h	lineage-specific expansion	NA
OG0000021	DDB_G0268340	EAL73623	dd	1	0.31	1.54	20h	lineage-specific expansion	NA
OG0000021	DDB_G0280031	EAL67487	dd	1	0.21	1.07	20h	lineage-specific expansion	NA
OG0000021	DDB_G0285315	EAL64787	dd	0.9	0.38	1.36	24h	lineage-specific expansion	1
OG0000021	DDB_G0291878	EAL61469	dd	1	0.48	2.39	8h	lineage-specific expansion	NA
OG0000021	DDB_G0291940	EAL61500	dd	1	0.27	1.34	24h	lineage-specific expansion	0
OG0000023	PPL_09917	EFA76612	pp	0.94	6.58	26.41	0h	lineage-specific expansion	0.000382154
OG0000027	DFA_07455	EGG20331	df	0.79	18.59	50.19	12h	lineage-specific expansion	0
OG0000029	PPL_03248	EFA84174	pp	0.92	0.53	2	24h	lineage-specific expansion	0
OG0000031	DLAC_01182	KYR02351	dl	0.95	5.19	21.93	24h	lineage-specific expansion	0.0824649
OG0000033	PPL_01409	EFA85452	pp	0.94	2.77	11.29	0h	lineage-specific expansion	0.170337
OG0000033	PPL_06854	EFA80033	pp	0.9	3.42	12.18	0h	lineage-specific expansion	0.924644
OG0000035	PPL_02136	EFA85137	pp	0.91	0.71	2.64	0h	lineage-specific expansion	0
OG0000035	PPL_11382	EFA75306	pp	0.89	1.59	5.53	0h	lineage-specific expansion	0
OG0000036	DFA_03186	EGG24941	df	0.8	31.09	86.91	8h	lineage-specific expansion	NA
OG0000036	DFA_07420	EGG20297	df	0.9	108.62	390.93	12h	lineage-specific expansion	0.000321689
OG0000037	DICPUDRAFT_74721	EGC39736	dp	0.94	8.16	33.39	0h	lineage-specific expansion	1
OG0000037	DICPUDRAFT_74729	EGC39744	dp	0.94	4.29	17.38	0h	lineage-specific expansion	1
OG0000042	DDB_G0271018	EAL72859	dd	1	0.45	2.27	20h	lineage-specific expansion	NA
OG0000042	DDB_G0273323	EAL70879	dd	0.97	0.24	1.08	20h	lineage-specific expansion	1
OG0000042	DDB_G0276495	EAL69201	dd	1	0.78	3.92	20h	lineage-specific expansion	1
OG0000042	DDB_G0277297	EAL68835	dd	1	0.38	1.92	24h	lineage-specific expansion	NA
OG0000042	DDB_G0279389	EAL67843	dd	1	0.43	2.13	20h	lineage-specific expansion	1
OG0000042	DDB_G0282797	EAL66258	dd	1	0.23	1.15	12h	lineage-specific expansion	0.403476
OG0000042	DDB_G0293158	EAL60931	dd	0.9	0.3	1.06	20h	lineage-specific expansion	NA
OG0000046	PPL_01801	EFA84808	pp	0.98	9.17	42.03	0h	lineage-specific expansion	0.162035
OG0000046	PPL_07401	EFA79710	pp	0.92	4.72	18.01	0h	lineage-specific expansion	0.752944
OG0000046	PPL_07425	EFA79734	pp	0.94	62.24	255.05	0h	lineage-specific expansion	8.11765e-06
OG0000046	PPL_09333	EFA77835	pp	0.93	1.99	7.83	0h	lineage-specific expansion	0.000763157
OG0000048	DLAC_00373	KYR02895	dl	0.89	3.19	10.98	0h	lineage-specific expansion	0.387415
OG0000048	DLAC_03634	KYQ99694	dl	0.94	12.42	50.88	0h	lineage-specific expansion	1
OG0000048	DLAC_03963	KYQ96677	dl	0.89	2.52	8.79	0h	lineage-specific expansion	1
OG0000048	DLAC_04366	KYQ94086	dl	0.93	4.38	17.35	0h	lineage-specific expansion	0
OG0000048	DLAC_05482	KYQ92891	dl	0.9	8.61	30.7	0h	lineage-specific expansion	0.00957806
OG0000048	DLAC_06299	KYQ92336	dl	0.93	7.59	29.84	0h	lineage-specific expansion	0.0237877
OG0000048	DLAC_06686	KYQ92687	dl	0.91	13.06	48.19	0h	lineage-specific expansion	0.00032292
OG0000048	DLAC_10342	KYQ89110	dl	0.93	15.78	61.16	0h	lineage-specific expansion	0.779113
OG0000048	DLAC_10343	KYQ89111	dl	0.93	92.92	363.62	0h	lineage-specific expansion	0.000771321
OG0000048	DLAC_11756	KYQ90441	dl	0.94	36.3	145.9	0h	lineage-specific expansion	0.000324118
OG0000048	DLAC_11770	KYQ90693	dl	0.93	20.82	81.62	0h	lineage-specific expansion	1
OG0000052	DICPUDRAFT_152678	EGC35028	dp	0.97	30.43	138.24	0h	lineage-specific expansion	0.0276791
OG0000061	DLAC_04034	KYQ96736	dl	0.97	9.94	44.74	0h	lineage-specific expansion	0
OG0000061	DLAC_04035	KYQ96737	dl	0.97	16.08	71.81	0h	lineage-specific expansion	0
OG0000062	DFA_02704	EGG18964	df	0.92	1.17	4.45	24h	lineage-specific expansion	0
OG0000064	DDB_G0274529	EAL70157	dd	0.91	0.66	2.46	20h	lineage-specific expansion	0
OG0000064	DDB_G0290261	EAL62257	dd	0.95	21.04	87.9	0h	lineage-specific expansion	1
OG0000065	DICPUDRAFT_146538	EGC40610	dp	0.96	2.37	10.24	12h	lineage-specific expansion	0.000382557
OG0000065	DICPUDRAFT_48394	EGC34321	dp	0.96	1.57	6.66	12h	lineage-specific expansion	1
OG0000065	DICPUDRAFT_84141	EGC29885	dp	0.95	1.96	8.28	12h	lineage-specific expansion	0.122999
OG0000066	DICPUDRAFT_24137	EGC39918	dp	1	0.33	1.65	8h	lineage-specific expansion	1
OG0000066	DICPUDRAFT_24178	EGC39950	dp	1	0.24	1.22	8h	lineage-specific expansion	0.815249
OG0000066	DICPUDRAFT_28057	EGC38799	dp	1	0.61	3.04	24h	lineage-specific expansion	1
OG0000066	DICPUDRAFT_32968	EGC35704	dp	1	0.34	1.69	20h	lineage-specific expansion	1
OG0000068	DFA_11006	EGG14746	df	0.79	5.19	14.26	24h	lineage-specific expansion	0
OG0000070	DFA_08379	EGG17384	df	0.81	16.17	46.45	24h	lineage-specific expansion	0.151282
OG0000070	DFA_10617	EGG15774	df	0.9	17.2	62.08	24h	lineage-specific expansion	0.00120349
OG0000074	PPL_08607	EFA77962	pp	0.95	22.69	94.97	24h	lineage-specific expansion	0
OG0000076	DICPUDRAFT_47964	EGC34950	dp	0.95	202.65	842.59	12h	lineage-specific expansion	4.6e-05
OG0000076	DICPUDRAFT_59151	EGC28857	dp	0.94	145.47	592.92	12h	lineage-specific expansion	1.78448e-05
OG0000076	DICPUDRAFT_92112	EGC34949	dp	0.96	8.68	37.46	12h	lineage-specific expansion	0.0219065
OG0000078	DFA_10539	EGG15697	df	0.9	3.99	14.08	0h	lineage-specific expansion	0.0162956
OG0000079	DFA_09291	EGG16261	df	0.85	10.81	33.62	12h	lineage-specific expansion	0.000267375
OG0000080	DICPUDRAFT_85197	EGC28730	dp	1	0.5	2.49	20h	lineage-specific expansion	0
OG0000086	DICPUDRAFT_42538	EGC29667	dp	1	0.6	3	8h	lineage-specific expansion	1
OG0000086	DICPUDRAFT_74222	EGC40311	dp	1	0.33	1.63	20h	lineage-specific expansion	1
OG0000086	DICPUDRAFT_76981	EGC37411	dp	1	0.65	3.23	24h	lineage-specific expansion	1
OG0000092	DDB_G0267506	EAL73206	dd	0.93	4.8	18.88	24h	lineage-specific expansion	0
OG0000092	DDB_G0273211	EAL70823	dd	0.99	50.68	245.45	24h	lineage-specific expansion	1
OG0000094	PPL_06840	EFA80019	pp	0.92	15.33	57.83	0h	lineage-specific expansion	4.3125e-06
OG0000106	DLAC_02256	KYR01149	dl	0.93	7.53	29.82	20h	lineage-specific expansion	4.34032e-05
OG0000114	DDB_G0271028	EAL72864	dd	1	0.2	1.01	20h	lineage-specific expansion	0
OG0000114	DDB_G0281107	EAL66850	dd	1	0.31	1.56	24h	lineage-specific expansion	1
OG0000114	DDB_G0282755	EAL66237	dd	0.9	0.6	2.13	20h	lineage-specific expansion	0.534983
OG0000114	DDB_G0289793	EAL62608	dd	1	0.43	2.14	20h	lineage-specific expansion	0.763889
OG0000114	DDB_G0293630	EAL60627	dd	1	0.43	2.13	20h	lineage-specific expansion	1
OG0000116	DDB_G0276593	EAL69139	dd	0.94	3.15	12.75	20h	lineage-specific expansion	1
OG0000122	DLAC_00920	KYR02121	dl	0.95	37.44	158.61	0h	lineage-specific expansion	0
OG0000122	DLAC_07414	KYQ91640	dl	0.91	9.16	33.45	0h	lineage-specific expansion	0.000325286
OG0000141	DFA_00083	EGG19505	df	0.91	0.28	1.03	24h	lineage-specific expansion	4.3125e-06
OG0000142	DLAC_03404	KYR00244	dl	0.91	0.49	1.8	24h	lineage-specific expansion	0.000129761
OG0000145	DICPUDRAFT_146591	EGC40420	dp	1	0.25	1.26	24h	lineage-specific expansion	1
OG0000145	DICPUDRAFT_158213	EGC30106	dp	1	0.32	1.6	24h	lineage-specific expansion	0.546792
OG0000148	DDB_G0268304	EAL73605	dd	0.91	20.75	75.86	8h	lineage-specific expansion	0
OG0000148	DDB_G0283249	EAL65863	dd	0.9	0.51	1.83	8h	lineage-specific expansion	0.000177429
OG0000148	DDB_G0283323	EAL65802	dd	0.92	1.32	4.96	8h	lineage-specific expansion	1.47857e-05
OG0000148	DDB_G0291514	EAL61741	dd	0.9	10.73	38.4	8h	lineage-specific expansion	0
OG0000157	DFA_04657	EGG22529	df	0.78	1.18	3.17	12h	lineage-specific expansion	1
OG0000163	DDB_G0293320	EAL60784	dd	1	0.23	1.15	8h	lineage-specific expansion	1
OG0000170	DFA_00162	EGG19584	df	0.79	0.41	1.11	24h	lineage-specific expansion	0
OG0000170	DFA_04367	EGG22249	df	0.9	14.49	52.37	8h	lineage-specific expansion	1
OG0000170	DFA_05348	EGG23216	df	0.81	2.6	7.44	8h	lineage-specific expansion	1
OG0000174	DFA_00589	EGG20726	df	0.84	8.58	25.99	24h	lineage-specific expansion	1
OG0000174	DFA_01096	EGG21221	df	0.95	5.29	21.99	24h	lineage-specific expansion	1
OG0000175	PPL_03340	EFA84263	pp	0.97	1.69	7.5	8h	lineage-specific expansion	0
OG0000175	PPL_10078	EFA76315	pp	0.91	27.34	99.22	0h	lineage-specific expansion	0.0034411
OG0000177	DLAC_09865	KYQ89513	dl	0.95	29.38	121.96	0h	lineage-specific expansion	0.256596
OG0000182	DDB_G0271460	EAL71860	dd	1	0.46	2.31	12h	lineage-specific expansion	0
OG0000196	DFA_01111	EGG21236	df	0.85	12.86	40.35	24h	lineage-specific expansion	0.000125455
OG0000205	DFA_00734	EGG20869	df	0.83	100.02	298.44	0h	lineage-specific expansion	0
OG0000205	DFA_07724	EGG16746	df	0.88	101.64	339.81	0h	lineage-specific expansion	0.269078
OG0000207	DDB_G0270288	EAL72494	dd	0.92	29.8	112.92	20h	lineage-specific expansion	1
OG0000207	DDB_G0270290	EAL72495	dd	0.91	13.65	50.28	20h	lineage-specific expansion	1
OG0000207	DDB_G0270292	EAL72496	dd	0.95	47.22	198.37	20h	lineage-specific expansion	1
OG0000207	DDB_G0270294	EAL72497	dd	0.92	72.19	272.97	20h	lineage-specific expansion	1
OG0000207	DDB_G0292222	EAL61321	dd	0.92	6	23.07	20h	lineage-specific expansion	0.129572
OG0000213	DICPUDRAFT_100012	EGC28852	dp	0.98	21.18	96.34	12h	lineage-specific expansion	1
OG0000213	DICPUDRAFT_78110	EGC36231	dp	0.96	0.56	2.45	12h	lineage-specific expansion	1
OG0000216	DICPUDRAFT_41424	EGC30444	dp	1	0.54	2.7	24h	lineage-specific expansion	0
OG0000218	PPL_07826	EFA79408	pp	0.91	1.05	3.89	0h	lineage-specific expansion	0
OG0000221	DLAC_08403	KYQ91436	dl	0.9	57.84	204.18	8h	lineage-specific expansion	0
OG0000221	DLAC_08979	KYQ90364	dl	0.92	107.35	411.98	8h	lineage-specific expansion	8.11765e-06
OG0000222	DICPUDRAFT_151399	EGC36167	dp	1	0.28	1.4	8h	lineage-specific expansion	9.87231e-05
OG0000222	DICPUDRAFT_155837	EGC32211	dp	1	0.71	3.55	24h	lineage-specific expansion	0
OG0000222	DICPUDRAFT_160219	EGC28397	dp	1	1.56	7.82	20h	lineage-specific expansion	0.145152
OG0000223	PPL_03808	EFA83024	pp	0.96	0.34	1.46	8h	lineage-specific expansion	0.0490205
OG0000223	PPL_06112	EFA81272	pp	0.93	2.77	10.68	8h	lineage-specific expansion	0
OG0000237	DFA_01925	EGG22036	df	0.89	38.38	131.69	24h	lineage-specific expansion	0.000140029
OG0000237	DFA_06417	EGG24267	df	0.85	35.17	111.15	24h	lineage-specific expansion	1.15e-05
OG0000240	DDB_G0282439	EAL66079	dd	0.99	60.2	290.5	24h	lineage-specific expansion	0.295565
OG0000240	DDB_G0282441	EAL66080	dd	0.97	3.06	13.62	24h	lineage-specific expansion	0.448105
OG0000240	DDB_G0282443	EAL66081	dd	1	2.83	14.15	24h	lineage-specific expansion	0.517253
OG0000240	DDB_G0293906	EAL60452	dd	1	1.13	5.66	20h	lineage-specific expansion	0.874658
OG0000241	DICPUDRAFT_154745	EGC33221	dp	0.98	7.29	34.03	24h	lineage-specific expansion	0.0158189
OG0000244	PPL_02536	EFA84501	pp	0.93	2.14	8.36	0h	lineage-specific expansion	0.0018423
OG0000244	PPL_08077	EFA78622	pp	0.95	1.91	8.06	0h	lineage-specific expansion	1
OG0000244	PPL_11206	EFA75132	pp	0.94	35.23	141.41	0h	lineage-specific expansion	0
OG0000253	DICPUDRAFT_77794	EGC36559	dp	0.96	5.33	23.35	12h	lineage-specific expansion	1.15e-05
OG0000254	DLAC_00954	KYR02149	dl	0.97	18.52	83.2	0h	lineage-specific expansion	0.0364376
OG0000254	DLAC_02433	KYR00439	dl	0.93	4.31	16.96	0h	lineage-specific expansion	0
OG0000254	DLAC_03611	KYQ99672	dl	0.99	6.86	32.37	0h	lineage-specific expansion	0
OG0000254	DLAC_06706	KYQ92705	dl	0.88	3.75	12.62	0h	lineage-specific expansion	4.3125e-06
OG0000255	DLAC_11224	KYQ88506	dl	0.94	7.72	30.9	0h	lineage-specific expansion	0.0231608
OG0000256	DICPUDRAFT_80198	EGC34064	dp	1	2.76	13.82	24h	lineage-specific expansion	1
OG0000258	DICPUDRAFT_147018	EGC40135	dp	1	0.67	3.37	24h	lineage-specific expansion	0.0676604
OG0000258	DICPUDRAFT_152930	EGC34819	dp	1	0.34	1.68	24h	lineage-specific expansion	1
OG0000258	DICPUDRAFT_157546	EGC30692	dp	1	0.42	2.1	8h	lineage-specific expansion	0.0193093
OG0000260	DICPUDRAFT_155721	EGC32338	dp	0.95	2.94	12.13	24h	lineage-specific expansion	0.0229126
OG0000260	DICPUDRAFT_83253	EGC30835	dp	0.95	5.92	24.31	24h	lineage-specific expansion	0.0518027
OG0000267	PPL_09809	EFA77056	pp	0.91	0.32	1.19	0h	lineage-specific expansion	0
OG0000290	PPL_08355	EFA78887	pp	0.94	15.64	63.27	0h	lineage-specific expansion	0.016905
OG0000293	DLAC_01784	KYR01772	dl	0.99	767.07	3646.08	0h	lineage-specific expansion	0
OG0000293	DLAC_08606	KYQ90026	dl	1	694.96	3445.05	0h	lineage-specific expansion	0.000509737
OG0000293	DLAC_08607	KYQ90027	dl	0.99	614.22	2943.31	0h	lineage-specific expansion	1
OG0000293	DLAC_08608	KYQ90028	dl	0.99	292.69	1414.27	0h	lineage-specific expansion	1
OG0000293	DLAC_10279	KYQ89053	dl	0.89	66.78	229.28	0h	lineage-specific expansion	0.175523
OG0000294	PPL_00457	EFA86656	pp	0.89	23.32	81.44	0h	lineage-specific expansion	0.0142182
OG0000298	DICPUDRAFT_156409	EGC31702	dp	1	0.2	1.01	8h	lineage-specific expansion	1
OG0000306	DDB_G0271320	EAL71790	dd	0.96	33.46	144.41	24h	lineage-specific expansion	0.000321689
OG0000310	DLAC_01752	KYR01743	dl	0.95	4.98	21.01	0h	lineage-specific expansion	1.15e-05
OG0000310	DLAC_04223	KYQ96906	dl	0.95	11.35	47.04	0h	lineage-specific expansion	0
OG0000310	DLAC_04227	KYQ96908	dl	0.98	13.33	61.08	0h	lineage-specific expansion	0
OG0000326	PPL_09088	EFA78436	pp	0.98	143.74	663.27	0h	lineage-specific expansion	8.11765e-06
OG0000326	PPL_12466	EFA77255	pp	0.94	3.66	14.72	0h	lineage-specific expansion	0.000230324
OG0000326	PPL_12467	EFA77256	pp	0.92	4.71	18	0h	lineage-specific expansion	0.333211
OG0000327	DLAC_04140	KYQ96834	dl	0.88	4.37	14.83	20h	lineage-specific expansion	1
OG0000327	DLAC_11577	KYQ96890	dl	0.97	12.14	54.48	24h	lineage-specific expansion	1
OG0000341	DLAC_01216	KYR02378	dl	0.92	3.99	15.26	0h	lineage-specific expansion	0
OG0000341	DLAC_01218	KYR02380	dl	0.94	1.36	5.51	0h	lineage-specific expansion	0
OG0000341	DLAC_02496	KYR00492	dl	0.97	21.58	97.59	0h	lineage-specific expansion	0
OG0000356	DICPUDRAFT_74249	EGC40199	dp	1	0.55	2.74	12h	lineage-specific expansion	1
OG0000374	DFA_03560	EGG25311	df	0.85	27.79	87.38	0h	lineage-specific expansion	0
OG0000374	DFA_09431	EGG16397	df	0.83	82.42	247.73	24h	lineage-specific expansion	2.07e-05
OG0000375	PPL_00052	EFA74554	pp	0.96	21.03	91.29	0h	lineage-specific expansion	0
OG0000375	PPL_00057	EFA74559	pp	0.94	9.29	37.22	0h	lineage-specific expansion	4.3125e-06
OG0000375	PPL_01045	EFA85814	pp	0.96	24.98	106.58	0h	lineage-specific expansion	2.07e-05
OG0000376	DFA_06919	EGG19817	df	0.8	28.72	79.99	0h	lineage-specific expansion	0
OG0000376	DFA_10703	EGG14830	df	0.84	5.13	15.75	24h	lineage-specific expansion	1
OG0000398	DDB_G0267778	EAL73342	dd	0.93	0.28	1.11	24h	lineage-specific expansion	0.80542
OG0000436	PPL_00405	EFA86604	pp	0.91	12.2	44.41	0h	lineage-specific expansion	1.78448e-05
OG0000436	PPL_04125	EFA83332	pp	0.92	7.61	28.89	8h	lineage-specific expansion	0.0787679
OG0000438	DFA_07561	EGG20437	df	0.78	7.44	19.94	24h	lineage-specific expansion	3.0541e-05
OG0000440	PPL_02542	EFA84507	pp	0.89	24.56	86.31	20h	lineage-specific expansion	1
OG0000446	DLAC_11503	KYR01367	dl	0.89	1.16	4.01	0h	lineage-specific expansion	1
OG0000449	PPL_03314	EFA84237	pp	0.91	1.26	4.6	24h	lineage-specific expansion	0.939894
OG0000459	DDB_G0275497	EAL69499	dd	0.91	4.08	14.98	0h	lineage-specific expansion	0.00120349
OG0000460	PPL_11179	EFA75105	pp	0.96	3.93	16.94	0h	lineage-specific expansion	0.263598
OG0000533	DFA_05030	EGG22900	df	0.8	10.81	29.7	12h	lineage-specific expansion	0
OG0000535	DFA_03476	EGG25228	df	0.84	36.86	112.79	0h	lineage-specific expansion	0.000159
OG0000537	DLAC_10625	KYQ88826	dl	0.89	15.4	52.86	0h	lineage-specific expansion	0.0282818
OG0000539	PPL_08139	EFA78679	pp	0.9	3.36	12.06	0h	lineage-specific expansion	1
OG0000539	PPL_11957	EFA74923	pp	0.92	2.23	8.32	0h	lineage-specific expansion	0.00399246
OG0000684	DLAC_07160	KYQ91922	dl	0.9	33.24	118.87	0h	lineage-specific expansion	0.0203577
OG0000685	DICPUDRAFT_147720	EGC39506	dp	0.97	13.91	61.31	24h	lineage-specific expansion	0.0434571
OG0000691	PPL_00966	EFA85736	pp	0.93	30.96	121.27	0h	lineage-specific expansion	0
OG0000855	DICPUDRAFT_96288	EGC40241	dp	0.98	39.72	185.27	8h	lineage-specific expansion	1.47857e-05
OG0000878	DFA_08166	EGG17182	df	0.83	24.52	72.23	24h	lineage-specific expansion	0.000572444
OG0000883	DFA_04460	EGG22342	df	0.79	2.42	6.53	24h	lineage-specific expansion	0.00188802
OG0000885	DLAC_07452	KYQ91675	dl	0.9	2.49	8.82	20h	lineage-specific expansion	0.145162
OG0000885	DLAC_07649	KYQ91845	dl	0.9	1.38	4.96	24h	lineage-specific expansion	1
OG0000887	PPL_02003	EFA85009	pp	0.97	198.98	877.22	0h	lineage-specific expansion	0.0014609
OG0000887	PPL_06408	EFA80820	pp	0.96	5.82	25.48	0h	lineage-specific expansion	0.00160483
OG0000887	PPL_12465	EFA77254	pp	0.92	11.27	42.91	0h	lineage-specific expansion	0.0109454
OG0000890	DLAC_09615	KYQ89649	dl	0.96	21.09	91.83	24h	lineage-specific expansion	0.131285
OG0000893	DICPUDRAFT_150947	EGC36558	dp	1	0.95	4.74	12h	lineage-specific expansion	1
OG0000893	DICPUDRAFT_151735	EGC35841	dp	0.94	9.78	39.88	12h	lineage-specific expansion	1
OG0001101	DLAC_01723	KYR01714	dl	0.92	1.86	6.96	0h	lineage-specific expansion	0.778416
OG0001428	DFA_03989	EGG18495	df	0.86	62.87	201.8	0h	lineage-specific expansion	0.0676604
OG0001428	DFA_08262	EGG17270	df	0.92	20.36	76.65	0h	lineage-specific expansion	0.00947624
OG0001439	DLAC_00191	KYR02727	dl	0.92	3.81	14.34	12h	lineage-specific expansion	0.000638671
OG0001439	DLAC_08942	KYQ90334	dl	0.89	3.8	13.15	0h	lineage-specific expansion	0
OG0006040	DFA_07161	EGG20044	df	0.84	1.9	5.83	0h	lineage-specific expansion	1
OG0006065	DLAC_00641	KYR03141	dl	0.93	14.57	56.77	24h	lineage-specific expansion	0
OG0006065	DLAC_09017	KYQ90399	dl	0.97	2.78	12.57	24h	lineage-specific expansion	0.50709
OG0006065	DLAC_11534	KYR00916	dl	0.93	12.95	49.99	24h	lineage-specific expansion	0.0942337
OG0006068	DLAC_01653	KYR01651	dl	1	439.67	2170.72	0h	lineage-specific expansion	0.455982
OG0006075	PPL_08309	EFA78844	pp	0.96	53.47	229.92	0h	lineage-specific expansion	0.967655
OG0006075	PPL_08314	EFA78849	pp	0.96	2111.46	9056.01	0h	lineage-specific expansion	0.122999
OG0006075	PPL_08365	EFA78897	pp	0.98	469.21	2212.15	0h	lineage-specific expansion	1
OG0006075	PPL_08369	EFA78901	pp	0.96	15.32	65.42	0h	lineage-specific expansion	0.741672
OG0006168	DDB_G0271110	EAL71887	dd	0.97	799.51	3552.71	24h	lineage-specific gene
OG0006211	DDB_G0290855	EAL62022	dd	0.91	39.5	146.7	8h	lineage-specific gene
OG0006859	DDB_G0286685	EAL64098	dd	0.9	92.93	334.64	12h	lineage-specific gene
OG0006859	DDB_G0286689	EAL64100	dd	0.9	48.66	171.56	12h	lineage-specific gene
OG0007070	DFA_03425	EGG25177	df	0.91	75.13	274.27	12h	lineage-specific gene
OG0007130	DLAC_03712	KYQ99767	dl	0.99	541.18	2636.52	0h	lineage-specific gene
OG0007130	DLAC_06462	KYQ92478	dl	0.88	857.88	2937.14	24h	lineage-specific gene
OG0007132	DLAC_08278	KYQ91331	dl	0.93	7.37	29.14	0h	lineage-specific gene
OG0007132	DLAC_08279	KYQ91332	dl	0.98	3.35	15.63	0h	lineage-specific gene
OG0007132	DLAC_08281	KYQ91334	dl	0.92	4.71	17.92	0h	lineage-specific gene
OG0007132	DLAC_08282	KYQ91335	dl	0.98	3.55	16.26	0h	lineage-specific gene
OG0007141	PPL_05833	EFA80998	pp	0.93	8.73	34.54	0h	lineage-specific gene
OG0007143	PPL_00697	EFA86136	pp	1	363.99	1786.5	8h	lineage-specific gene
OG0007143	PPL_00738	EFA86176	pp	0.9	1215.1	4328.11	8h	lineage-specific gene
OG0007143	PPL_03541	EFA83396	pp	0.91	411.59	1493.33	8h	lineage-specific gene
OG0007526	DFA_04354	EGG22236	df	0.83	181.65	540.93	0h	lineage-specific gene
OG0007660	DLAC_06319	KYQ92356	dl	0.97	4.81	21.18	24h	lineage-specific gene
OG0007660	DLAC_06328	KYQ92363	dl	0.99	653.95	3198.41	24h	lineage-specific gene
OG0007684	PPL_06455	EFA80866	pp	0.95	39.81	166.53	0h	lineage-specific gene
OG0007685	PPL_05404	EFA81418	pp	0.97	2.29	10.29	0h	lineage-specific gene
OG0007685	PPL_05406	EFA81420	pp	0.99	2.85	13.5	0h	lineage-specific gene
OG0007685	PPL_06007	EFA81170	pp	0.89	17.72	61.21	0h	lineage-specific gene
OG0007687	PPL_11570	EFA74602	pp	0.97	36.69	165.84	0h	lineage-specific gene
OG0007688	PPL_00111	EFA86321	pp	0.97	0.52	2.28	20h	lineage-specific gene
OG0007688	PPL_03094	EFA84021	pp	0.94	0.4	1.61	20h	lineage-specific gene
OG0008367	DFA_02465	EGG19217	df	0.79	13.92	37.71	0h	lineage-specific gene
OG0008509	DICPUDRAFT_76197	EGC38207	dp	0.94	22.69	92.52	8h	lineage-specific gene
OG0008531	DDB_G0295779	EEU04065	dd	0.92	149.8	566.81	0h	lineage-specific gene
OG0008558	DDB_G0294190	EAL60382	dd	1	0.22	1.12	12h	lineage-specific gene
OG0008622	DDB_G0294168	EAL60412	dd	0.93	0.87	3.37	8h	lineage-specific gene
OG0008643	DDB_G0287249	EAL63826	dd	1	0.64	3.19	12h	lineage-specific gene
OG0008667	DDB_G0287453	EAL63794	dd	0.91	0.3	1.1	12h	lineage-specific gene
OG0008672	DDB_G0287501	EAL63693	dd	0.99	5.4	26.24	24h	lineage-specific gene
OG0008680	DDB_G0287579	EAL63689	dd	1	2.29	11.46	20h	lineage-specific gene
OG0008703	DDB_G0287765	EAL63529	dd	0.91	1.97	7.28	0h	lineage-specific gene
OG0008715	DDB_G0287835	EAL63564	dd	1	0.27	1.34	20h	lineage-specific gene
OG0008743	DDB_G0288167	EAL63371	dd	0.99	118.43	563.38	24h	lineage-specific gene
OG0008744	DDB_G0288185	EAL63323	dd	0.94	113.12	460.79	24h	lineage-specific gene
OG0008760	DDB_G0288397	EAL63224	dd	1	51.05	253.63	24h	lineage-specific gene
OG0008761	DDB_G0288399	EAL63225	dd	0.96	7.64	33.42	24h	lineage-specific gene
OG0008804	DDB_G0288781	EAL63012	dd	0.91	789.83	2923.03	24h	lineage-specific gene
OG0008809	DDB_G0288829	EAL63036	dd	0.98	105.75	492.03	24h	lineage-specific gene
OG0008812	DDB_G0288841	EAL63042	dd	1	489.13	2408.82	24h	lineage-specific gene
OG0008813	DDB_G0288843	EAL63043	dd	0.98	1.69	7.73	24h	lineage-specific gene
OG0008816	DDB_G0288881	EAL62964	dd	0.91	0.89	3.25	20h	lineage-specific gene
OG0008825	DDB_G0289065	EAL62911	dd	0.98	8.62	39.88	24h	lineage-specific gene
OG0008831	DDB_G0289095	EAL62897	dd	0.96	2.71	11.86	24h	lineage-specific gene
OG0008854	DDB_G0289279	EAL62803	dd	1	0.26	1.28	8h	lineage-specific gene
OG0008855	DDB_G0295745	EEU04059	dd	0.91	26.81	99.88	24h	lineage-specific gene
OG0008866	DDB_G0289359	EAL62766	dd	0.99	53.53	261.88	24h	lineage-specific gene
OG0008896	DDB_G0289579	EAL62656	dd	0.9	1.09	3.85	24h	lineage-specific gene
OG0008907	DDB_G0289783	EAL62603	dd	0.96	3.46	14.74	24h	lineage-specific gene
OG0008914	DDB_G0289745	EAL62584	dd	0.97	0.41	1.84	20h	lineage-specific gene
OG0008950	DDB_G0290151	EAL62370	dd	0.92	20.37	76.38	24h	lineage-specific gene
OG0008953	DDB_G0290167	EAL62355	dd	0.9	0.88	3.19	8h	lineage-specific gene
OG0008961	DDB_G0290247	EAL62345	dd	0.9	4.05	14.51	0h	lineage-specific gene
OG0008962	DDB_G0290203	EAL62323	dd	0.95	0.38	1.58	20h	lineage-specific gene
OG0009001	DDB_G0290521	EAL62121	dd	0.91	66.36	244.35	24h	lineage-specific gene
OG0009092	DDB_G0267198	EAL73836	dd	1	0.27	1.34	20h	lineage-specific gene
OG0009101	DDB_G0267224	EAL73849	dd	1	0.2	1	20h	lineage-specific gene
OG0009171	DDB_G0267628	EAL73267	dd	0.92	0.32	1.21	20h	lineage-specific gene
OG0009231	DDB_G0268400	EAL73653	dd	0.93	8.57	33.61	20h	lineage-specific gene
OG0009232	DDB_G0267936	EAL73421	dd	0.96	2.5	10.69	20h	lineage-specific gene
OG0009263	DDB_G0268166	EAL73536	dd	0.92	3.95	15.09	24h	lineage-specific gene
OG0009269	DDB_G0268458	EAL73682	dd	0.91	18.11	66.94	20h	lineage-specific gene
OG0009280	DDB_G0268604	EAL73755	dd	1	0.25	1.24	8h	lineage-specific gene
OG0009288	DDB_G0268470	EAL73688	dd	0.94	1.35	5.44	20h	lineage-specific gene
OG0009295	DDB_G0268670	EAL72924	dd	1	0.25	1.23	8h	lineage-specific gene
OG0009298	DDB_G0268676	EAL72927	dd	1	0.39	1.94	8h	lineage-specific gene
OG0009301	DDB_G0268688	EAL72933	dd	0.95	1.24	5.17	8h	lineage-specific gene
OG0009308	DDB_G0268942	EAL73060	dd	1	0.21	1.07	20h	lineage-specific gene
OG0009312	DDB_G0268724	EAL72951	dd	1	0.23	1.17	20h	lineage-specific gene
OG0009329	DDB_G0268740	EAL72959	dd	0.97	20.81	94.56	24h	lineage-specific gene
OG0009352	DDB_G0268842	EAL73010	dd	0.95	0.35	1.46	20h	lineage-specific gene
OG0009353	DDB_G0268858	EAL73018	dd	0.99	73.19	357.92	24h	lineage-specific gene
OG0009359	DDB_G0268896	EAL73037	dd	0.91	9.61	34.96	0h	lineage-specific gene
OG0009381	DDB_G0269390	EAL72045	dd	0.9	30.13	107.84	24h	lineage-specific gene
OG0009383	DDB_G0270504	EAL72602	dd	1	0.37	1.87	20h	lineage-specific gene
OG0009392	DDB_G0269428	EAL72064	dd	0.97	9.72	43.58	24h	lineage-specific gene
OG0009407	DDB_G0270536	EAL72618	dd	1	0.47	2.37	8h	lineage-specific gene
OG0009429	DDB_G0270594	EAL72647	dd	0.98	13.71	64.64	24h	lineage-specific gene
OG0009440	DDB_G0270614	EAL72657	dd	0.94	5.26	21.23	8h	lineage-specific gene
OG0009454	DDB_G0270638	EAL72669	dd	1	12.13	60.66	24h	lineage-specific gene
OG0009474	DDB_G0269866	EAL72283	dd	0.94	0.62	2.53	20h	lineage-specific gene
OG0009482	DDB_G0269904	EAL72302	dd	0.98	2.47	11.58	24h	lineage-specific gene
OG0009498	DDB_G0270004	EAL72352	dd	1	25.51	126.15	24h	lineage-specific gene
OG0009501	DDB_G0270010	EAL72355	dd	0.9	1.29	4.6	24h	lineage-specific gene
OG0009518	DDB_G0270144	EAL72422	dd	0.97	0.96	4.3	24h	lineage-specific gene
OG0009530	DDB_G0270236	EAL72468	dd	0.92	92.84	346.98	24h	lineage-specific gene
OG0009536	DDB_G0295695	EDR41117	dd	0.93	21.51	84.04	24h	lineage-specific gene
OG0009543	DDB_G0270794	EAL72747	dd	1	0.6	3.02	20h	lineage-specific gene
OG0009556	DDB_G0270812	EAL72756	dd	0.92	0.66	2.51	12h	lineage-specific gene
OG0009558	DDB_G0270820	EAL72760	dd	1	0.26	1.28	24h	lineage-specific gene
OG0009572	DDB_G0291293	EAL61630	dd	0.9	1.44	5.12	20h	lineage-specific gene
OG0009575	DDB_G0291364	EAL61666	dd	0.9	83.63	296.16	0h	lineage-specific gene
OG0009628	DDB_G0291826	EAL61534	dd	0.9	19.98	72.27	0h	lineage-specific gene
OG0009648	DDB_G0291982	EAL61347	dd	0.91	235.58	859.93	12h	lineage-specific gene
OG0009654	DDB_G0292172	EAL61442	dd	1	0.22	1.08	20h	lineage-specific gene
OG0009670	DDB_G0291988	EAL61350	dd	0.9	48.09	170.02	0h	lineage-specific gene
OG0009673	DDB_G0292198	EAL61455	dd	1	0.29	1.45	24h	lineage-specific gene
OG0009674	DDB_G0292228	EAL61324	dd	1	0.3	1.51	24h	lineage-specific gene
OG0009675	DDB_G0292210	EAL61315	dd	0.9	0.41	1.46	20h	lineage-specific gene
OG0009687	DDB_G0292364	EAL61306	dd	0.94	2.69	10.74	20h	lineage-specific gene
OG0009691	DDB_G0292370	EAL61309	dd	1	1.15	5.73	24h	lineage-specific gene
OG0009705	DDB_G0292496	EAL61227	dd	0.94	5.72	22.87	20h	lineage-specific gene
OG0009713	DDB_G0292598	EAL61102	dd	0.97	24.02	109.16	24h	lineage-specific gene
OG0009730	DDB_G0292798	EAL61073	dd	1	0.48	2.38	12h	lineage-specific gene
OG0009762	DDB_G0293112	EAL60908	dd	0.95	86.78	358.87	12h	lineage-specific gene
OG0009764	DDB_G0293152	EAL60928	dd	1	0.24	1.22	12h	lineage-specific gene
OG0009776	DDB_G0293324	EAL60786	dd	0.94	6.56	26.14	24h	lineage-specific gene
OG0009790	DDB_G0293422	EAL60732	dd	0.98	8.45	39.64	24h	lineage-specific gene
OG0009792	DDB_G0293430	EAL60727	dd	0.92	0.39	1.5	8h	lineage-specific gene
OG0009793	DDB_G0293432	EAL60728	dd	1	24.05	120.24	24h	lineage-specific gene
OG0009800	DDB_G0293506	EAL60688	dd	0.9	1.7	6.1	20h	lineage-specific gene
OG0009804	DDB_G0293684	EAL60654	dd	1	0.47	2.37	12h	lineage-specific gene
OG0009810	DDB_G0293688	EAL60656	dd	1	0.89	4.45	24h	lineage-specific gene
OG0009818	DDB_G0293734	EAL60679	dd	0.93	0.5	1.95	20h	lineage-specific gene
OG0009847	DDB_G0293854	EAL60498	dd	0.91	841.8	3140.91	24h	lineage-specific gene
OG0009849	DDB_G0293890	EAL60516	dd	1	268.63	1328.5	24h	lineage-specific gene
OG0009866	DDB_G0293998	EAL60441	dd	0.93	61.91	241.64	24h	lineage-specific gene
OG0009882	DDB_G0271380	EAL71820	dd	1	0.24	1.18	20h	lineage-specific gene
OG0009889	DDB_G0271260	EAL71760	dd	0.9	86.81	312.28	24h	lineage-specific gene
OG0009910	DDB_G0271422	EAL71841	dd	1	0.87	4.33	8h	lineage-specific gene
OG0009928	DDB_G0271450	EAL71855	dd	1	0.65	3.27	8h	lineage-specific gene
OG0009941	DDB_G0271568	EAL71648	dd	0.98	2.24	10.48	24h	lineage-specific gene
OG0009961	DDB_G0271588	EAL71658	dd	0.96	24.67	107.88	24h	lineage-specific gene
OG0009966	DDB_G0271704	EAL71542	dd	0.93	0.29	1.15	20h	lineage-specific gene
OG0009970	DDB_G0271756	EAL71568	dd	1	154.14	765.85	24h	lineage-specific gene
OG0009984	DDB_G0271762	EAL71571	dd	1	0.34	1.71	20h	lineage-specific gene
OG0010001	DDB_G0271920	EAL71484	dd	0.98	111.17	512.92	24h	lineage-specific gene
OG0010091	DDB_G0272718	EAL70996	dd	0.92	522.65	1965.19	0h	lineage-specific gene
OG0010105	DDB_G0272981	EAL71128	dd	0.97	1.57	6.93	24h	lineage-specific gene
OG0010112	DDB_G0272762	EAL71018	dd	0.9	0.65	2.35	20h	lineage-specific gene
OG0010155	DDB_G0273111	EAL70773	dd	0.99	19.43	94.27	24h	lineage-specific gene
OG0010157	DDB_G0273337	EAL70886	dd	1	36.19	177.67	24h	lineage-specific gene
OG0010164	DDB_G0273183	EAL70809	dd	0.97	127.31	559.25	24h	lineage-specific gene
OG0010272	DDB_G0274343	EAL70064	dd	0.99	77.24	370.94	24h	lineage-specific gene
OG0010299	DDB_G0274507	EAL70146	dd	0.9	222.47	797.18	20h	lineage-specific gene
OG0010301	DDB_G0274671	EAL70228	dd	1	0.37	1.84	20h	lineage-specific gene
OG0010330	DDB_G0274417	EAL70101	dd	1	1.24	6.19	8h	lineage-specific gene
OG0010331	DDB_G0274415	EAL70100	dd	1	0.64	3.22	8h	lineage-specific gene
OG0010351	DDB_G0274163	EAL69974	dd	0.92	27.3	102.2	24h	lineage-specific gene
OG0010354	DDB_G0274151	EAL69968	dd	0.92	1.98	7.49	20h	lineage-specific gene
OG0010365	DDB_G0275217	EAL69889	dd	1	0.32	1.58	8h	lineage-specific gene
OG0010388	DDB_G0275031	EAL69796	dd	0.97	95.26	429.5	24h	lineage-specific gene
OG0010401	DDB_G0275949	EAL69725	dd	0.96	137.49	597.56	24h	lineage-specific gene
OG0010407	DDB_G0275819	EAL69660	dd	0.91	364.01	1325.45	20h	lineage-specific gene
OG0010438	DDB_G0275757	EAL69629	dd	1	0.53	2.64	12h	lineage-specific gene
OG0010447	DDB_G0275903	EAL69702	dd	0.98	2.1	9.73	24h	lineage-specific gene
OG0010451	DDB_G0275481	EAL69491	dd	0.9	19.34	68.44	12h	lineage-specific gene
OG0010452	DDB_G0275483	EAL69492	dd	0.93	0.57	2.24	20h	lineage-specific gene
OG0010458	DDB_G0275915	EAL69708	dd	0.92	32.66	124.44	0h	lineage-specific gene
OG0010463	DDB_G0275475	EAL69488	dd	0.92	6.92	25.93	0h	lineage-specific gene
OG0010465	DDB_G0275463	EAL69482	dd	0.91	0.65	2.35	20h	lineage-specific gene
OG0010474	DDB_G0275975	EAL69444	dd	0.96	3.72	15.81	20h	lineage-specific gene
OG0010477	DDB_G0276009	EAL69461	dd	1	0.26	1.3	12h	lineage-specific gene
OG0010503	DDB_G0276063	EAL69331	dd	0.94	129.69	525.9	24h	lineage-specific gene
OG0010511	DDB_G0276257	EAL69428	dd	0.9	2.69	9.65	24h	lineage-specific gene
OG0010516	DDB_G0276323	EAL69308	dd	1	0.43	2.13	20h	lineage-specific gene
OG0010529	DDB_G0276525	EAL69216	dd	0.9	0.77	2.78	8h	lineage-specific gene
OG0010537	DDB_G0276497	EAL69202	dd	0.95	0.74	3.11	24h	lineage-specific gene
OG0010540	DDB_G0276499	EAL69203	dd	0.95	0.41	1.68	20h	lineage-specific gene
OG0010544	DDB_G0276433	EAL69170	dd	0.93	71.21	277.32	0h	lineage-specific gene
OG0010558	DDB_G0276591	EAL69152	dd	0.92	1.38	5.28	20h	lineage-specific gene
OG0010559	DDB_G0276605	EAL69145	dd	0.91	2.14	7.95	8h	lineage-specific gene
OG0010560	DDB_G0276609	EAL69147	dd	1	0.66	3.29	20h	lineage-specific gene
OG0010561	DDB_G0276599	EAL69142	dd	1	0.27	1.37	8h	lineage-specific gene
OG0010562	DDB_G0276595	EAL69140	dd	1	0.75	3.77	12h	lineage-specific gene
OG0010565	DDB_G0276619	EAL69122	dd	0.91	0.6	2.19	24h	lineage-specific gene
OG0010567	DDB_G0276629	EAL69127	dd	1	0.64	3.22	12h	lineage-specific gene
OG0010575	DDB_G0276613	EAS66910	dd	0.94	12.88	52.39	20h	lineage-specific gene
OG0010579	DDB_G0276655	EAL69085	dd	0.92	1	3.76	20h	lineage-specific gene
OG0010581	DDB_G0276665	EAL69090	dd	1	0.28	1.41	20h	lineage-specific gene
OG0010588	DDB_G0276687	EAL69101	dd	1	490.95	2412.05	24h	lineage-specific gene
OG0010593	DDB_G0276703	EAL69109	dd	1	1.03	5.14	20h	lineage-specific gene
OG0010621	DDB_G0276819	EAL68911	dd	0.91	5.44	20.22	20h	lineage-specific gene
OG0010641	DDB_G0276957	EAL68980	dd	0.96	4.71	20.13	20h	lineage-specific gene
OG0010643	DDB_G0277209	EAL68790	dd	0.9	4.83	17.34	24h	lineage-specific gene
OG0010649	DDB_G0277233	EAL68802	dd	0.92	146.04	549.41	20h	lineage-specific gene
OG0010684	DDB_G0277623	EAL68629	dd	0.96	0.38	1.62	24h	lineage-specific gene
OG0010691	DDB_G0277607	EAL68621	dd	0.95	35.12	144	0h	lineage-specific gene
OG0010696	DDB_G0277709	EAL68590	dd	1	34.71	171.31	24h	lineage-specific gene
OG0010701	DDB_G0277739	EAL68543	dd	0.92	115.46	432.9	20h	lineage-specific gene
OG0010702	DDB_G0277741	EAL68544	dd	0.95	55.7	229.89	20h	lineage-specific gene
OG0010714	DDB_G0277785	EAL68566	dd	1	0.42	2.09	8h	lineage-specific gene
OG0010757	DDB_G0277903	EAL68124	dd	0.99	1166.22	5510.08	24h	lineage-specific gene
OG0010784	DDB_G0278361	EAL68353	dd	1	0.33	1.63	8h	lineage-specific gene
OG0010786	DDB_G0278365	EAL68355	dd	1	0.3	1.52	0h	lineage-specific gene
OG0010790	DDB_G0278401	EAL68373	dd	0.91	1.3	4.81	20h	lineage-specific gene
OG0010793	DDB_G0278419	EAL68382	dd	0.94	1.27	5.21	20h	lineage-specific gene
OG0010802	DDB_G0278695	EAL68520	dd	0.97	124.96	562.55	24h	lineage-specific gene
OG0010804	DDB_G0278523	EAL68434	dd	0.92	19.52	74.14	0h	lineage-specific gene
OG0010807	DDB_G0278553	EAL68449	dd	1	40.81	201.37	24h	lineage-specific gene
OG0010808	DDB_G0278559	EAL68452	dd	0.96	34.55	147.01	24h	lineage-specific gene
OG0010836	DDB_G0280839	EAL67031	dd	0.91	0.6	2.23	20h	lineage-specific gene
OG0010838	DDB_G0280833	EAL67028	dd	1	0.22	1.11	20h	lineage-specific gene
OG0010845	DDB_G0295473	EDR41083	dd	0.95	210.82	883.36	0h	lineage-specific gene
OG0010851	DDB_G0279097	EAL67887	dd	0.91	0.41	1.53	20h	lineage-specific gene
OG0010852	DDB_G0279101	EAL67889	dd	0.91	16.07	58.93	12h	lineage-specific gene
OG0010855	DDB_G0279125	EAL67901	dd	0.93	249.19	963.45	20h	lineage-specific gene
OG0010887	DDB_G0279337	EAL67817	dd	0.96	235.62	1032.71	8h	lineage-specific gene
OG0010896	DDB_G0279595	EAL67736	dd	1	0.36	1.82	24h	lineage-specific gene
OG0010900	DDB_G0279541	EAL67709	dd	0.98	95.21	443.18	24h	lineage-specific gene
OG0010909	DDB_G0279651	EAL67600	dd	0.91	24.81	92.14	24h	lineage-specific gene
OG0010932	DDB_G0279861	EAL67544	dd	1	0.24	1.19	12h	lineage-specific gene
OG0010940	DDB_G0279935	EAL67439	dd	0.98	10.39	48.96	20h	lineage-specific gene
OG0010943	DDB_G0280023	EAL67483	dd	0.9	0.34	1.19	20h	lineage-specific gene
OG0010972	DDB_G0280331	EAL67392	dd	0.91	3.37	12.49	24h	lineage-specific gene
OG0010976	DDB_G0280337	EAL67395	dd	0.98	250.08	1161.04	24h	lineage-specific gene
OG0011002	DDB_G0280561	EAL67082	dd	0.94	682.55	2779.85	24h	lineage-specific gene
OG0011003	DDB_G0280563	EAL67083	dd	0.95	0.59	2.46	24h	lineage-specific gene
OG0011009	DDB_G0280603	EAL67103	dd	0.91	12.22	44.69	8h	lineage-specific gene
OG0011017	DDB_G0280641	EAL67122	dd	1	0.42	2.11	20h	lineage-specific gene
OG0011021	DDB_G0280547	EAL67075	dd	0.92	374.08	1434.22	8h	lineage-specific gene
OG0011022	DDB_G0280533	EAL67068	dd	0.95	242.97	1011.97	0h	lineage-specific gene
OG0011031	DDB_G0280665	EAL67134	dd	0.91	1.43	5.2	20h	lineage-specific gene
OG0011039	DDB_G0280685	EAL67144	dd	0.92	3.75	14.21	12h	lineage-specific gene
OG0011049	DDB_G0280751	EAL67177	dd	0.95	9.18	37.89	8h	lineage-specific gene
OG0011097	DDB_G0281041	EAL66817	dd	1	0.5	2.48	8h	lineage-specific gene
OG0011114	DDB_G0281189	EAL66891	dd	0.93	57.59	223.05	20h	lineage-specific gene
OG0011117	DDB_G0281197	EAL66895	dd	0.9	18.34	65.83	20h	lineage-specific gene
OG0011142	DDB_G0281417	EAL66690	dd	0.92	57.12	218.42	8h	lineage-specific gene
OG0011156	DDB_G0281513	EAL66738	dd	0.91	12.02	44.78	24h	lineage-specific gene
OG0011183	DDB_G0281757	EAL66640	dd	1	42.13	207.44	24h	lineage-specific gene
OG0011184	DDB_G0281769	EAL66646	dd	0.95	229.48	963.43	24h	lineage-specific gene
OG0011190	DDB_G0281879	EAL66499	dd	0.94	7.61	30.5	12h	lineage-specific gene
OG0011215	DDB_G0282013	EAL66428	dd	0.97	5.78	25.91	24h	lineage-specific gene
OG0011248	DDB_G0282315	EAL66279	dd	0.93	62.93	248.09	20h	lineage-specific gene
OG0011249	DDB_G0282317	EAL66280	dd	0.97	7.82	35.36	20h	lineage-specific gene
OG0011251	DDB_G0282321	EAL66282	dd	0.92	9.28	35.1	20h	lineage-specific gene
OG0011252	DDB_G0282323	EAL66283	dd	0.97	18.84	83.43	20h	lineage-specific gene
OG0011255	DDB_G0282331	EAL66287	dd	0.95	0.84	3.49	20h	lineage-specific gene
OG0011256	DDB_G0282335	EAL66289	dd	0.92	0.7	2.65	12h	lineage-specific gene
OG0011258	DDB_G0282355	EAL66299	dd	1	2.01	10.06	12h	lineage-specific gene
OG0011261	DDB_G0282399	EAL66059	dd	0.9	270.67	979.35	20h	lineage-specific gene
OG0011262	DDB_G0282401	EAL66060	dd	0.92	131.96	504.49	20h	lineage-specific gene
OG0011267	DDB_G0282455	EAL66087	dd	0.99	53.19	257.7	24h	lineage-specific gene
OG0011295	DDB_G0282585	EAL66152	dd	0.93	13.26	51.88	12h	lineage-specific gene
OG0011296	DDB_G0282589	EAL66154	dd	0.96	13.12	56.03	24h	lineage-specific gene
OG0011303	DDB_G0282791	EAL66255	dd	0.91	0.7	2.55	8h	lineage-specific gene
OG0011310	DDB_G0282799	EAL66259	dd	1	0.43	2.16	8h	lineage-specific gene
OG0011313	DDB_G0282681	EAL66200	dd	0.97	1.09	4.94	24h	lineage-specific gene
OG0011318	DDB_G0282703	EAL66211	dd	1	0.95	4.74	12h	lineage-specific gene
OG0011382	DDB_G0283301	EAL65791	dd	0.91	7.78	28.89	8h	lineage-specific gene
OG0011383	DDB_G0283337	EAL65809	dd	0.97	2.69	12	8h	lineage-specific gene
OG0011388	DDB_G0283395	EAL65682	dd	0.96	18.47	78.53	20h	lineage-specific gene
OG0011399	DDB_G0283519	EAL65744	dd	0.9	384.31	1360.12	20h	lineage-specific gene
OG0011412	DDB_G0283467	EAL65718	dd	0.94	48.22	193.85	8h	lineage-specific gene
OG0011413	DDB_G0283469	EAL65719	dd	0.97	14.7	66.36	8h	lineage-specific gene
OG0011421	DDB_G0283645	EAL65589	dd	0.95	143.83	590.31	8h	lineage-specific gene
OG0011422	DDB_G0283611	EAL65572	dd	0.91	210.78	774.54	8h	lineage-specific gene
OG0011424	DDB_G0283613	EAL65573	dd	0.96	177.31	760.14	8h	lineage-specific gene
OG0011428	DDB_G0283659	EAL65596	dd	0.95	1.65	6.91	20h	lineage-specific gene
OG0011432	DDB_G0283693	EAL65613	dd	0.92	4.1	15.7	8h	lineage-specific gene
OG0011436	DDB_G0283713	EAL65623	dd	0.9	5.22	18.44	12h	lineage-specific gene
OG0011453	DDB_G0283929	EAL65452	dd	0.97	100.15	441.35	24h	lineage-specific gene
OG0011454	DDB_G0283931	EAL65453	dd	0.94	28.32	115.16	24h	lineage-specific gene
OG0011463	DDB_G0284095	EAL65388	dd	0.93	1.71	6.69	8h	lineage-specific gene
OG0011485	DDB_G0284283	EAL65330	dd	0.92	88.36	339.16	20h	lineage-specific gene
OG0011486	DDB_G0284285	EAL65331	dd	0.91	0.57	2.08	20h	lineage-specific gene
OG0011511	DDB_G0284665	EAL65102	dd	0.92	0.37	1.39	8h	lineage-specific gene
OG0011512	DDB_G0284673	EAL65106	dd	0.94	0.53	2.17	20h	lineage-specific gene
OG0011530	DDB_G0284875	EAL64901	dd	0.9	0.66	2.37	20h	lineage-specific gene
OG0011537	DDB_G0284927	EAL64927	dd	0.97	237.3	1071.89	0h	lineage-specific gene
OG0011538	DDB_G0284925	EAL64926	dd	0.9	152.51	540.77	0h	lineage-specific gene
OG0011539	DDB_G0285043	EAL64985	dd	0.91	105.09	382	0h	lineage-specific gene
OG0011580	DDB_G0285383	EAL64766	dd	0.93	28.71	110.6	24h	lineage-specific gene
OG0011581	DDB_G0285441	EAL64558	dd	1	9.85	49.24	24h	lineage-specific gene
OG0011582	DDB_G0285737	EAL64706	dd	1	636.14	3146.29	24h	lineage-specific gene
OG0011583	DDB_G0285443	EAL64559	dd	1	345.18	1703.03	24h	lineage-specific gene
OG0011595	DDB_G0285549	EAL64612	dd	0.96	24.63	106.23	20h	lineage-specific gene
OG0011596	DDB_G0285551	EAL64613	dd	0.96	20.4	88.91	20h	lineage-specific gene
OG0011598	DDB_G0285567	EAL64621	dd	1	492.63	2439.09	24h	lineage-specific gene
OG0011599	DDB_G0285569	EAL64622	dd	1	300.46	1491.24	24h	lineage-specific gene
OG0011601	DDB_G0285583	EAL64629	dd	0.95	1.12	4.62	8h	lineage-specific gene
OG0011611	DDB_G0285633	EAL64654	dd	0.94	4.92	19.82	8h	lineage-specific gene
OG0011634	DDB_G0285873	EAL64471	dd	0.96	1.93	8.41	24h	lineage-specific gene
OG0011654	DDB_G0286081	EAL64419	dd	0.94	2.57	10.51	20h	lineage-specific gene
OG0011665	DDB_G0286203	EAL64277	dd	0.98	5.01	22.84	24h	lineage-specific gene
OG0011695	DDB_G0286407	EAL64228	dd	1	0.21	1.04	12h	lineage-specific gene
OG0011728	DDB_G0286631	EAL64071	dd	0.98	248.29	1167.78	24h	lineage-specific gene
OG0011734	DDB_G0286667	EAL64089	dd	0.94	7.64	30.64	20h	lineage-specific gene
OG0011735	DDB_G0286675	EAL64093	dd	1	405.26	2009.88	24h	lineage-specific gene
OG0011736	DDB_G0286815	EAL64163	dd	0.99	4.14	19.87	24h	lineage-specific gene
OG0011737	DDB_G0286779	EAL64145	dd	0.95	13.29	56.33	8h	lineage-specific gene
OG0011742	DDB_G0286717	EAL64114	dd	1	0.29	1.45	0h	lineage-specific gene
OG0011773	DDB_G0286937	EAL63966	dd	1	0.21	1.06	8h	lineage-specific gene
OG0011813	DFA_09820	EGG15000	df	0.85	2.59	8.11	24h	lineage-specific gene
OG0011819	DFA_09846	EGG15024	df	0.84	8.39	25.86	12h	lineage-specific gene
OG0011829	DFA_09900	EGG15077	df	0.84	24.77	75.31	0h	lineage-specific gene
OG0011845	DFA_09962	EGG15138	df	0.93	302.54	1175.4	12h	lineage-specific gene
OG0011848	DFA_09986	EGG15160	df	0.88	25.05	85.57	24h	lineage-specific gene
OG0011860	DFA_10031	EGG15201	df	0.81	4.73	13.53	12h	lineage-specific gene
OG0011906	DFA_10222	EGG15388	df	0.79	21.15	57.3	0h	lineage-specific gene
OG0011960	DFA_10399	EGG15557	df	0.85	2.16	6.67	24h	lineage-specific gene
OG0011983	DFA_10450	EGG15608	df	0.95	80.57	333.28	12h	lineage-specific gene
OG0011984	DFA_10451	EGG15609	df	0.88	22.25	75.72	24h	lineage-specific gene
OG0011990	DFA_10470	EGG15628	df	0.86	15.09	48.17	12h	lineage-specific gene
OG0012012	DFA_10524	EGG15682	df	0.8	2.47	6.8	24h	lineage-specific gene
OG0012015	DFA_10531	EGG15689	df	0.8	28.08	78.24	24h	lineage-specific gene
OG0012040	DFA_10613	EGG15770	df	0.81	52.44	150.41	12h	lineage-specific gene
OG0012055	DFA_09506	EGG15837	df	0.88	4.38	14.97	24h	lineage-specific gene
OG0012085	DFA_09594	EGG15923	df	0.84	41.19	126.33	0h	lineage-specific gene
OG0012086	DFA_09596	EGG15925	df	0.87	3.76	12.36	8h	lineage-specific gene
OG0012092	DFA_09608	EGG15937	df	0.87	2420.23	7864.96	0h	lineage-specific gene
OG0012117	DFA_09716	EGG16044	df	0.81	1.18	3.36	0h	lineage-specific gene
OG0012118	DFA_09717	EGG16045	df	0.97	34.32	152.19	0h	lineage-specific gene
OG0012125	DFA_09742	EGG16070	df	0.9	13.36	47.81	24h	lineage-specific gene
OG0012142	DFA_05901	EGG23766	df	0.86	16.03	50.78	12h	lineage-specific gene
OG0012144	DFA_05903	EGG23768	df	0.83	0.69	2.06	24h	lineage-specific gene
OG0012176	DFA_06067	EGG23929	df	0.83	5.29	15.59	24h	lineage-specific gene
OG0012179	DFA_06086	EGG23948	df	0.8	14.97	41.66	24h	lineage-specific gene
OG0012183	DFA_06111	EGG23973	df	0.89	78.09	272.95	12h	lineage-specific gene
OG0012215	DFA_06187	EGG24049	df	0.84	4.05	12.27	20h	lineage-specific gene
OG0012252	DFA_06283	EGG24140	df	0.83	21.54	64.2	0h	lineage-specific gene
OG0012257	DFA_06301	EGG24155	df	0.87	197.37	647.24	24h	lineage-specific gene
OG0012269	DFA_06328	EGG24181	df	0.82	18.47	53.94	0h	lineage-specific gene
OG0012317	DFA_06480	EGG24330	df	0.95	1.84	7.69	24h	lineage-specific gene
OG0012318	DFA_06481	EGG24331	df	0.85	157.15	487.37	8h	lineage-specific gene
OG0012358	DFA_02799	EGG24556	df	0.84	8.69	26.18	24h	lineage-specific gene
OG0012380	DFA_02840	EGG24597	df	0.86	19.27	61.11	24h	lineage-specific gene
OG0012393	DFA_02859	EGG24616	df	0.81	0.45	1.28	0h	lineage-specific gene
OG0012395	DFA_02861	EGG24618	df	0.94	62.72	255.85	0h	lineage-specific gene
OG0012405	DFA_02909	EGG24665	df	0.93	54.66	214.65	0h	lineage-specific gene
OG0012407	DFA_02916	EGG24672	df	0.8	0.99	2.78	24h	lineage-specific gene
OG0012429	DFA_02981	EGG24737	df	0.86	87.73	280.75	24h	lineage-specific gene
OG0012462	DFA_03108	EGG24863	df	0.83	113.89	340.57	8h	lineage-specific gene
OG0012465	DFA_03114	EGG24869	df	0.8	8.37	23.07	24h	lineage-specific gene
OG0012466	DFA_03115	EGG24870	df	0.81	268.4	764.75	8h	lineage-specific gene
OG0012491	DFA_03216	EGG24971	df	1	0.46	2.3	24h	lineage-specific gene
OG0012501	DFA_03259	EGG25013	df	0.87	57.48	187.61	24h	lineage-specific gene
OG0012510	DFA_03283	EGG25037	df	0.83	1.85	5.49	8h	lineage-specific gene
OG0012512	DFA_03288	EGG25042	df	0.9	9.03	32.26	12h	lineage-specific gene
OG0012529	DFA_03351	EGG25105	df	0.85	7.88	24.76	0h	lineage-specific gene
OG0012567	DFA_03527	EGG25279	df	0.82	6.54	19.04	24h	lineage-specific gene
OG0012580	DFA_03571	EGG25322	df	0.97	18.66	84.28	24h	lineage-specific gene
OG0012593	DFA_03631	EGG25382	df	0.83	37.77	113.42	12h	lineage-specific gene
OG0012594	DFA_03632	EGG25383	df	0.82	23.01	66.81	12h	lineage-specific gene
OG0012596	DFA_03634	EGG25385	df	0.84	34.35	104.1	12h	lineage-specific gene
OG0012616	DFA_07638	EGG16660	df	0.8	37.72	104.64	12h	lineage-specific gene
OG0012657	DFA_07794	EGG16816	df	0.93	5.8	22.96	24h	lineage-specific gene
OG0012807	DFA_08342	EGG17347	df	0.83	772.17	2310	12h	lineage-specific gene
OG0012810	DFA_08362	EGG17367	df	0.82	1.14	3.34	24h	lineage-specific gene
OG0012811	DFA_08363	EGG17368	df	0.8	22.95	63.98	0h	lineage-specific gene
OG0012812	DFA_08375	EGG17380	df	0.83	48.21	144.14	12h	lineage-specific gene
OG0012840	DFA_08505	EGG17509	df	0.82	9.05	26.01	24h	lineage-specific gene
OG0012841	DFA_08506	EGG17510	df	0.81	6.01	16.94	24h	lineage-specific gene
OG0012843	DFA_08512	EGG17516	df	0.8	227.52	629.04	8h	lineage-specific gene
OG0012847	DFA_08518	EGG17522	df	0.92	47.32	177.5	8h	lineage-specific gene
OG0012905	DFA_08817	EGG17816	df	0.88	2.63	8.99	24h	lineage-specific gene
OG0012912	DFA_08836	EGG17835	df	0.81	6.36	17.92	0h	lineage-specific gene
OG0012936	DFA_08918	EGG17917	df	0.81	6.23	17.65	24h	lineage-specific gene
OG0012952	DFA_11093	EGG13332	df	0.92	11.78	44.15	12h	lineage-specific gene
OG0012973	DFA_11142	EGG13381	df	0.84	31.86	97.47	8h	lineage-specific gene
OG0012976	DFA_11147	EGG13386	df	0.81	1.44	4.06	24h	lineage-specific gene
OG0012994	DFA_11187	EGG13426	df	0.82	170.32	496.79	8h	lineage-specific gene
OG0013072	DFA_11488	EGG13727	df	0.84	2042.59	6288.98	12h	lineage-specific gene
OG0013076	DFA_11510	EGG13749	df	0.85	11.08	34.86	24h	lineage-specific gene
OG0013077	DFA_11511	EGG13750	df	0.84	57.47	176.29	0h	lineage-specific gene
OG0013111	DFA_11702	EGG13941	df	0.94	726.89	2885.18	8h	lineage-specific gene
OG0013115	DFA_11717	EGG13956	df	0.81	26.9	76.84	0h	lineage-specific gene
OG0013153	DFA_11863	EGG14099	df	0.97	1303.3	5716.94	12h	lineage-specific gene
OG0013185	DFA_11995	EGG14225	df	0.84	18.24	55.38	0h	lineage-specific gene
OG0013186	DFA_11999	EGG14229	df	0.83	25.58	75.33	8h	lineage-specific gene
OG0013201	DFA_12064	EGG14294	df	0.82	12.16	35.06	24h	lineage-specific gene
OG0013223	DFA_12139	EGG14367	df	0.9	4.92	17.41	24h	lineage-specific gene
OG0013238	DFA_12187	EGG14415	df	0.84	0.55	1.69	20h	lineage-specific gene
OG0013286	DFA_12316	EGG14540	df	0.81	15.8	45.06	8h	lineage-specific gene
OG0013291	DFA_12340	EGG14564	df	0.84	68.22	208.98	8h	lineage-specific gene
OG0013319	DFA_09169	EGG16144	df	0.79	6.92	18.84	20h	lineage-specific gene
OG0013368	DFA_09322	EGG16292	df	0.79	4.36	11.93	8h	lineage-specific gene
OG0013370	DFA_09328	EGG16298	df	0.83	893.03	2681.11	12h	lineage-specific gene
OG0013409	DFA_03674	EGG18187	df	0.84	1188.87	3612.22	8h	lineage-specific gene
OG0013430	DFA_03735	EGG18248	df	0.81	341.63	966.88	24h	lineage-specific gene
OG0013453	DFA_03827	EGG18333	df	0.92	6.45	24.54	0h	lineage-specific gene
OG0013454	DFA_03834	EGG18340	df	0.81	44.18	124.48	12h	lineage-specific gene
OG0013503	DFA_04031	EGG18537	df	0.79	15.5	42.2	24h	lineage-specific gene
OG0013520	DFA_04098	EGG18604	df	0.91	18.73	68.85	24h	lineage-specific gene
OG0013526	DFA_04110	EGG18615	df	0.85	145.64	454.41	0h	lineage-specific gene
OG0013541	DFA_04164	EGG18668	df	0.8	40.84	113.91	12h	lineage-specific gene
OG0013545	DFA_04177	EGG18681	df	0.82	121.32	352.36	24h	lineage-specific gene
OG0013556	DFA_04203	EGG18707	df	0.82	30.09	86.94	24h	lineage-specific gene
OG0013571	DFA_10911	EGG14653	df	0.95	87.21	364.31	8h	lineage-specific gene
OG0013573	DFA_10913	EGG14655	df	0.89	14.57	50.2	8h	lineage-specific gene
OG0013578	DFA_10946	EGG14688	df	0.88	62.73	212.91	24h	lineage-specific gene
OG0013592	DFA_11000	EGG14740	df	0.89	4.65	15.97	24h	lineage-specific gene
OG0013595	DFA_11011	EGG14751	df	0.81	5.5	15.53	24h	lineage-specific gene
OG0013601	DFA_02021	EGG19236	df	0.86	25.6	81.43	24h	lineage-specific gene
OG0013604	DFA_02036	EGG19250	df	0.85	213.16	661.81	0h	lineage-specific gene
OG0013617	DFA_02079	EGG19292	df	0.91	8.72	31.89	8h	lineage-specific gene
OG0013632	DFA_02114	EGG19327	df	0.95	8.54	35.36	24h	lineage-specific gene
OG0013644	DFA_02158	EGG19371	df	0.86	10.67	34.14	12h	lineage-specific gene
OG0013651	DFA_02230	EGG18987	df	0.79	563.13	1525.96	8h	lineage-specific gene
OG0013653	DFA_02239	EGG18996	df	0.8	26.5	74.14	8h	lineage-specific gene
OG0013659	DFA_02265	EGG19022	df	0.81	11.19	31.56	24h	lineage-specific gene
OG0013690	DFA_02346	EGG19100	df	0.81	5.04	14.41	24h	lineage-specific gene
OG0013699	DFA_02370	EGG19123	df	0.79	3.11	8.46	24h	lineage-specific gene
OG0013774	DFA_02660	EGG18920	df	0.81	102.71	288.63	12h	lineage-specific gene
OG0013797	DFA_10670	EGG14797	df	0.82	13.54	39.09	20h	lineage-specific gene
OG0013829	DFA_10748	EGG14875	df	0.8	171.6	475.79	12h	lineage-specific gene
OG0013875	DFA_04912	EGG22782	df	0.85	9.61	30.34	0h	lineage-specific gene
OG0013886	DFA_04927	EGG22797	df	0.89	25.72	89.74	24h	lineage-specific gene
OG0013902	DFA_04967	EGG22837	df	0.84	320.9	974.36	0h	lineage-specific gene
OG0013924	DFA_05007	EGG22877	df	0.79	10	26.91	8h	lineage-specific gene
OG0013946	DFA_05068	EGG22938	df	0.82	4.41	12.95	24h	lineage-specific gene
OG0014014	DFA_05251	EGG23121	df	0.89	82.92	290.6	12h	lineage-specific gene
OG0014032	DFA_05289	EGG23157	df	0.8	1.96	5.47	20h	lineage-specific gene
OG0014040	DFA_05315	EGG23183	df	0.82	18.91	55.02	24h	lineage-specific gene
OG0014042	DFA_05317	EGG23185	df	0.9	31.02	112.31	24h	lineage-specific gene
OG0014045	DFA_05333	EGG23201	df	0.84	3298.02	10010.8	12h	lineage-specific gene
OG0014102	DFA_05599	EGG23466	df	0.91	24.72	90.1	8h	lineage-specific gene
OG0014140	DFA_05778	EGG23644	df	0.8	57.23	157.96	24h	lineage-specific gene
OG0014147	DFA_05800	EGG23666	df	0.95	32.5	133.47	24h	lineage-specific gene
OG0014151	DFA_05814	EGG23680	df	0.85	105.37	331.03	12h	lineage-specific gene
OG0014185	DFA_00108	EGG19530	df	0.8	4.69	12.9	0h	lineage-specific gene
OG0014252	DFA_00268	EGG19690	df	0.8	21.11	58.67	12h	lineage-specific gene
OG0014306	DFA_06745	EGG18078	df	0.92	5.52	21.06	0h	lineage-specific gene
OG0014324	DFA_06800	EGG18133	df	0.85	0.54	1.68	24h	lineage-specific gene
OG0014330	DFA_06812	EGG18145	df	0.81	13.48	38.01	12h	lineage-specific gene
OG0014353	DFA_06847	EGG18180	df	0.84	2.86	8.68	24h	lineage-specific gene
OG0014362	DFA_06874	EGG19774	df	0.79	16.52	44.73	8h	lineage-specific gene
OG0014384	DFA_06999	EGG19895	df	0.82	133.08	385.97	0h	lineage-specific gene
OG0014428	DFA_07276	EGG20156	df	0.89	5.75	19.9	24h	lineage-specific gene
OG0014429	DFA_07278	EGG20158	df	0.82	26.73	76.83	24h	lineage-specific gene
OG0014438	DFA_07319	EGG20199	df	0.83	250.25	747.45	8h	lineage-specific gene
OG0014447	DFA_07371	EGG20248	df	0.85	401.82	1253.22	12h	lineage-specific gene
OG0014482	DFA_07492	EGG20368	df	0.88	4.18	13.95	0h	lineage-specific gene
OG0014494	DFA_07545	EGG20421	df	0.95	0.37	1.57	24h	lineage-specific gene
OG0014508	DFA_04287	EGG22169	df	0.81	97.19	279.17	0h	lineage-specific gene
OG0014517	DFA_04320	EGG22202	df	0.81	3.92	11.19	24h	lineage-specific gene
OG0014520	DFA_04326	EGG22208	df	0.9	15.82	57.03	0h	lineage-specific gene
OG0014626	DFA_04778	EGG22648	df	0.83	30.63	91.56	24h	lineage-specific gene
OG0014627	DFA_04781	EGG22651	df	0.87	518.06	1693.08	0h	lineage-specific gene
OG0014651	DFA_09032	EGG16494	df	0.9	245.6	888.67	8h	lineage-specific gene
OG0014652	DFA_09034	EGG16496	df	0.85	338.98	1058.31	8h	lineage-specific gene
OG0014689	DFA_00409	EGG20548	df	0.96	769.43	3295.39	12h	lineage-specific gene
OG0014706	DFA_00468	EGG20607	df	0.81	3.53	10.04	24h	lineage-specific gene
OG0014732	DFA_00495	EGG20634	df	0.81	22.53	63.49	12h	lineage-specific gene
OG0014818	DFA_00828	EGG20959	df	0.88	18.45	63.02	24h	lineage-specific gene
OG0014824	DFA_00861	EGG20992	df	0.8	21.83	60.94	24h	lineage-specific gene
OG0014838	DFA_00936	EGG21063	df	0.81	100.36	284.06	8h	lineage-specific gene
OG0014846	DFA_00961	EGG21086	df	0.81	17.25	49.38	24h	lineage-specific gene
OG0014851	DFA_00977	EGG21102	df	0.87	26.77	87	24h	lineage-specific gene
OG0014863	DFA_01066	EGG21191	df	0.79	342.76	931.86	12h	lineage-specific gene
OG0014867	DFA_01109	EGG21234	df	0.89	6.01	21.09	0h	lineage-specific gene
OG0014888	DFA_01234	EGG21353	df	0.82	21.73	63.18	8h	lineage-specific gene
OG0014898	DFA_01275	EGG21393	df	0.87	2279.72	7552.65	8h	lineage-specific gene
OG0014900	DFA_01277	EGG21395	df	0.85	23.71	74.22	8h	lineage-specific gene
OG0014903	DFA_01298	EGG21414	df	0.85	19.05	59.06	12h	lineage-specific gene
OG0014925	DFA_01413	EGG21527	df	0.82	138.3	397.91	8h	lineage-specific gene
OG0014951	DFA_01547	EGG21661	df	0.81	79.06	226.95	0h	lineage-specific gene
OG0014962	DFA_01589	EGG21703	df	0.96	58.28	249.73	24h	lineage-specific gene
OG0014981	DFA_01654	EGG21768	df	0.96	19.95	85.23	8h	lineage-specific gene
OG0015020	DFA_01807	EGG21921	df	0.84	150.92	458.78	12h	lineage-specific gene
OG0015053	DFA_01897	EGG22008	df	0.79	129.66	353.19	8h	lineage-specific gene
OG0015082	DLAC_07211	KYQ91874	dl	0.97	0.59	2.65	0h	lineage-specific gene
OG0015099	DLAC_11681	KYQ91943	dl	0.89	13.91	48.75	0h	lineage-specific gene
OG0015108	DLAC_03993	KYQ96700	dl	0.88	25.97	88.79	24h	lineage-specific gene
OG0015118	DLAC_04109	KYQ96806	dl	0.89	12.37	42.49	0h	lineage-specific gene
OG0015119	DLAC_04122	KYQ96818	dl	0.95	73.26	308.47	24h	lineage-specific gene
OG0015130	DLAC_04176	KYQ96867	dl	0.91	9.36	34.83	24h	lineage-specific gene
OG0015137	DLAC_04247	KYQ96927	dl	0.91	5.56	20.19	0h	lineage-specific gene
OG0015189	DLAC_03308	KYR00156	dl	0.97	24.98	112.17	24h	lineage-specific gene
OG0015213	DLAC_03461	KYR00295	dl	0.91	1.55	5.66	0h	lineage-specific gene
OG0015222	DLAC_03617	KYQ99679	dl	0.9	65.16	235.07	12h	lineage-specific gene
OG0015226	DLAC_03624	KYQ99686	dl	0.94	742.16	2979.61	24h	lineage-specific gene
OG0015240	DLAC_11560	KYQ99724	dl	0.93	7.22	27.85	0h	lineage-specific gene
OG0015246	DLAC_03682	KYQ99742	dl	0.97	55.99	253.89	24h	lineage-specific gene
OG0015257	DLAC_03790	KYQ99839	dl	0.88	1.49	5.05	0h	lineage-specific gene
OG0015268	DLAC_03884	KYQ99917	dl	0.91	1.13	4.14	24h	lineage-specific gene
OG0015270	DLAC_03900	KYQ99934	dl	0.88	17.17	57.31	20h	lineage-specific gene
OG0015275	DLAC_11512	KYR01325	dl	0.88	37.86	129.1	20h	lineage-specific gene
OG0015287	DLAC_06833	KYQ92007	dl	0.95	0.58	2.39	20h	lineage-specific gene
OG0015293	DLAC_06858	KYQ92029	dl	0.96	0.27	1.17	24h	lineage-specific gene
OG0015301	DLAC_06921	KYQ92084	dl	0.89	1.98	6.85	24h	lineage-specific gene
OG0015332	DLAC_07126	KYQ92277	dl	0.88	10.46	35.53	20h	lineage-specific gene
OG0015333	DLAC_07127	KYQ92278	dl	0.9	11.33	39.99	20h	lineage-specific gene
OG0015351	DLAC_07862	KYQ90975	dl	0.9	9.14	32.82	0h	lineage-specific gene
OG0015383	DLAC_08131	KYQ91208	dl	0.9	229.34	821.88	24h	lineage-specific gene
OG0015396	DLAC_08274	KYQ91328	dl	1	209.82	1041.62	0h	lineage-specific gene
OG0015398	DLAC_08280	KYQ91333	dl	0.95	2.29	9.68	0h	lineage-specific gene
OG0015399	DLAC_08284	KYQ91336	dl	0.97	5.09	22.81	0h	lineage-specific gene
OG0015405	DLAC_08315	KYQ91362	dl	0.98	194.06	890.79	0h	lineage-specific gene
OG0015431	DLAC_08442	KYQ91475	dl	0.97	0.75	3.4	24h	lineage-specific gene
OG0015444	DLAC_02134	KYR01046	dl	0.95	5.02	20.87	20h	lineage-specific gene
OG0015448	DLAC_02155	KYR01061	dl	0.91	33.65	125.14	20h	lineage-specific gene
OG0015458	DLAC_02222	KYR01120	dl	0.88	9.4	31.46	0h	lineage-specific gene
OG0015464	DLAC_02248	KYR01143	dl	0.9	22.24	80.54	20h	lineage-specific gene
OG0015466	DLAC_02253	KYR01147	dl	0.94	22.88	91.23	24h	lineage-specific gene
OG0015484	DLAC_02334	KYR01216	dl	0.9	100.17	356.94	20h	lineage-specific gene
OG0015496	DLAC_10713	KYQ88689	dl	0.96	27.08	116.33	0h	lineage-specific gene
OG0015498	DLAC_10719	KYQ88696	dl	0.88	22.94	78.17	20h	lineage-specific gene
OG0015507	DLAC_10765	KYQ88737	dl	0.91	0.57	2.11	24h	lineage-specific gene
OG0015531	DLAC_06307	KYQ92344	dl	0.92	6.68	25.54	24h	lineage-specific gene
OG0015533	DLAC_06315	KYQ92352	dl	0.89	4.47	15.45	0h	lineage-specific gene
OG0015549	DLAC_06400	KYQ92421	dl	0.88	22.46	74.98	0h	lineage-specific gene
OG0015552	DLAC_06408	KYQ92429	dl	0.94	4.83	19.77	0h	lineage-specific gene
OG0015563	DLAC_06459	KYQ92475	dl	0.92	269.08	1014.41	0h	lineage-specific gene
OG0015580	DLAC_06559	KYQ92570	dl	0.95	192.37	812.76	24h	lineage-specific gene
OG0015581	DLAC_06560	KYQ92571	dl	0.98	16.03	74.93	24h	lineage-specific gene
OG0015596	DLAC_06653	KYQ92659	dl	0.88	9.85	32.98	0h	lineage-specific gene
OG0015602	DLAC_06697	KYQ92697	dl	0.89	2.85	9.82	24h	lineage-specific gene
OG0015605	DLAC_06737	KYQ92732	dl	0.9	29.51	105.32	0h	lineage-specific gene
OG0015634	DLAC_09617	KYQ89651	dl	0.88	3.17	10.8	24h	lineage-specific gene
OG0015658	DLAC_09813	KYQ89836	dl	0.87	33.64	111.58	0h	lineage-specific gene
OG0015670	DLAC_09892	KYQ89237	dl	0.97	76.27	343.21	0h	lineage-specific gene
OG0015678	DLAC_09962	KYQ89302	dl	0.94	22.25	88.81	20h	lineage-specific gene
OG0015689	DLAC_11804	KYQ89387	dl	0.96	8.58	37.28	0h	lineage-specific gene
OG0015690	DLAC_10067	KYQ89407	dl	0.88	23.82	79.91	12h	lineage-specific gene
OG0015697	DLAC_10124	KYQ89455	dl	0.92	41.47	155.58	8h	lineage-specific gene
OG0015740	DLAC_00007	KYR02568	dl	0.93	20.64	80.14	0h	lineage-specific gene
OG0015791	DLAC_00357	KYR02881	dl	0.91	2.48	9.12	24h	lineage-specific gene
OG0015792	DLAC_00358	KYR02882	dl	0.91	625.92	2309.23	24h	lineage-specific gene
OG0015806	DLAC_00443	KYR02960	dl	0.97	22.05	97.94	24h	lineage-specific gene
OG0015837	DLAC_00604	KYR03109	dl	0.91	1.78	6.61	0h	lineage-specific gene
OG0015854	DLAC_04958	KYQ93585	dl	0.9	4.59	16.48	0h	lineage-specific gene
OG0015862	DLAC_04992	KYQ93613	dl	0.88	95.61	325.89	20h	lineage-specific gene
OG0015863	DLAC_04993	KYQ93614	dl	0.89	7.69	26.92	20h	lineage-specific gene
OG0015865	DLAC_04999	KYQ93618	dl	0.87	2.11	7.02	0h	lineage-specific gene
OG0015867	DLAC_05002	KYQ93620	dl	0.93	2.95	11.57	0h	lineage-specific gene
OG0015869	DLAC_05015	KYQ93633	dl	0.89	43.82	154.21	8h	lineage-specific gene
OG0015873	DLAC_05028	KYQ93645	dl	0.92	12.28	45.93	0h	lineage-specific gene
OG0015877	DLAC_05070	KYQ93683	dl	0.94	36.34	147.81	24h	lineage-specific gene
OG0015880	DLAC_05081	KYQ93693	dl	0.95	25.15	103.69	0h	lineage-specific gene
OG0015896	DLAC_05221	KYQ93822	dl	0.98	11.77	55.12	24h	lineage-specific gene
OG0015901	DLAC_05260	KYQ93860	dl	0.93	16.59	64.26	0h	lineage-specific gene
OG0015914	DLAC_05306	KYQ93902	dl	0.95	44.01	185.78	0h	lineage-specific gene
OG0015918	DLAC_05320	KYQ93911	dl	0.88	5.38	18.12	20h	lineage-specific gene
OG0015922	DLAC_05353	KYQ92774	dl	0.88	27.76	92.79	0h	lineage-specific gene
OG0015976	DLAC_05715	KYQ93092	dl	0.96	98.01	426.42	24h	lineage-specific gene
OG0016016	DLAC_06104	KYQ93416	dl	0.92	8.89	34.09	0h	lineage-specific gene
OG0016040	DLAC_06211	KYQ93513	dl	0.88	148.45	503.04	0h	lineage-specific gene
OG0016074	DLAC_04381	KYQ94100	dl	0.98	15.9	72.34	24h	lineage-specific gene
OG0016102	DLAC_04457	KYQ94167	dl	0.9	1733	6263.62	0h	lineage-specific gene
OG0016106	DLAC_04491	KYQ94198	dl	0.94	57.13	231.63	20h	lineage-specific gene
OG0016123	DLAC_04623	KYQ94324	dl	0.99	70.29	340.34	0h	lineage-specific gene
OG0016135	DLAC_04721	KYQ94425	dl	0.9	17.95	64.11	0h	lineage-specific gene
OG0016137	DLAC_04723	KYQ94427	dl	0.88	253.42	853.53	0h	lineage-specific gene
OG0016144	DLAC_04758	KYQ94460	dl	0.88	6.54	22.26	0h	lineage-specific gene
OG0016173	DLAC_10329	KYQ89098	dl	0.89	432.71	1496.34	20h	lineage-specific gene
OG0016175	DLAC_10344	KYQ89112	dl	0.9	11.88	42.16	0h	lineage-specific gene
OG0016176	DLAC_10345	KYQ89113	dl	0.89	53.27	186.35	0h	lineage-specific gene
OG0016204	DLAC_10539	KYQ88950	dl	0.9	0.71	2.57	24h	lineage-specific gene
OG0016240	DLAC_02601	KYR00582	dl	0.98	4.54	21.1	24h	lineage-specific gene
OG0016248	DLAC_02659	KYR00632	dl	0.96	318.97	1363.43	0h	lineage-specific gene
OG0016255	DLAC_02702	KYR00668	dl	0.99	21.34	102.37	24h	lineage-specific gene
OG0016260	DLAC_11529	KYR00687	dl	0.89	37.06	129.59	0h	lineage-specific gene
OG0016295	DLAC_02912	KYR00855	dl	0.93	22.18	86.22	0h	lineage-specific gene
OG0016321	DLAC_02998	KYR00935	dl	0.94	5.45	22.11	0h	lineage-specific gene
OG0016324	DLAC_03017	KYR00952	dl	0.89	0.9	3.16	24h	lineage-specific gene
OG0016350	DLAC_01555	KYR01561	dl	0.89	49.12	172.76	8h	lineage-specific gene
OG0016366	DLAC_01637	KYR01635	dl	0.94	9.12	36.57	24h	lineage-specific gene
OG0016374	DLAC_01654	KYR01652	dl	0.99	19.58	92.87	0h	lineage-specific gene
OG0016391	DLAC_01729	KYR01719	dl	0.97	61.98	272.66	0h	lineage-specific gene
OG0016392	DLAC_01730	KYR01720	dl	0.98	172.51	794.18	0h	lineage-specific gene
OG0016393	DLAC_01738	KYR01727	dl	0.89	3.79	13.17	0h	lineage-specific gene
OG0016428	DLAC_11504	KYR01372	dl	0.96	5.64	23.95	24h	lineage-specific gene
OG0016433	DLAC_01970	KYR01383	dl	0.89	163.39	568.19	0h	lineage-specific gene
OG0016440	DLAC_10874	KYQ88190	dl	0.9	3.68	13	24h	lineage-specific gene
OG0016441	DLAC_11829	KYQ88191	dl	0.88	3.1	10.47	24h	lineage-specific gene
OG0016442	DLAC_10875	KYQ88192	dl	0.92	2.89	11.07	24h	lineage-specific gene
OG0016451	DLAC_10931	KYQ88243	dl	0.94	117.18	476.23	24h	lineage-specific gene
OG0016485	DLAC_11134	KYQ88430	dl	0.93	1.15	4.55	24h	lineage-specific gene
OG0016490	DLAC_11203	KYQ88489	dl	0.93	19.88	77.92	24h	lineage-specific gene
OG0016516	DLAC_10580	KYQ88785	dl	0.96	19.96	87.01	24h	lineage-specific gene
OG0016537	DLAC_10699	KYQ88889	dl	0.94	45.96	187.22	24h	lineage-specific gene
OG0016560	DLAC_00839	KYR02043	dl	0.97	3.12	13.89	0h	lineage-specific gene
OG0016582	DLAC_00941	KYR02140	dl	0.95	1.93	8.13	24h	lineage-specific gene
OG0016585	DLAC_00955	KYR02150	dl	0.93	15.58	60.39	0h	lineage-specific gene
OG0016588	DLAC_00994	KYR02179	dl	0.89	30.98	108.22	0h	lineage-specific gene
OG0016591	DLAC_01008	KYR02191	dl	0.92	0.45	1.68	24h	lineage-specific gene
OG0016593	DLAC_01014	KYR02197	dl	0.95	1.95	8.08	0h	lineage-specific gene
OG0016595	DLAC_01021	KYR02202	dl	0.87	35.94	119.14	0h	lineage-specific gene
OG0016616	DLAC_01256	KYR02416	dl	0.9	6.63	23.44	0h	lineage-specific gene
OG0016626	DLAC_01290	KYR02450	dl	0.98	49.49	226.67	0h	lineage-specific gene
OG0016643	DLAC_01380	KYR02535	dl	0.93	3.31	13.1	0h	lineage-specific gene
OG0016645	DLAC_01386	KYR02541	dl	0.98	26.99	123.63	0h	lineage-specific gene
OG0016660	DLAC_07338	KYQ91569	dl	1	0.43	2.13	24h	lineage-specific gene
OG0016664	DLAC_07344	KYQ91574	dl	0.93	16.23	63.52	0h	lineage-specific gene
OG0016696	DLAC_07612	KYQ91817	dl	0.91	75.65	278.55	0h	lineage-specific gene
OG0016717	DLAC_08497	KYQ89927	dl	0.94	1.96	7.94	0h	lineage-specific gene
OG0016733	DLAC_08582	KYQ90007	dl	0.91	8.18	30.5	24h	lineage-specific gene
OG0016739	DLAC_08615	KYQ90033	dl	0.94	37.71	153.49	12h	lineage-specific gene
OG0016750	DLAC_11737	KYQ90062	dl	0.88	23.86	80.33	20h	lineage-specific gene
OG0016764	DLAC_08765	KYQ90172	dl	0.92	12.49	47.24	0h	lineage-specific gene
OG0016765	DLAC_08766	KYQ90173	dl	0.89	19.61	68.43	0h	lineage-specific gene
OG0016774	DLAC_08850	KYQ90247	dl	0.91	12.92	47.15	0h	lineage-specific gene
OG0016786	DLAC_08914	KYQ90312	dl	0.9	5.9	20.83	0h	lineage-specific gene
OG0016812	DLAC_09055	KYQ90433	dl	0.95	262.12	1093.15	24h	lineage-specific gene
OG0016817	DLAC_09073	KYQ90450	dl	0.95	5.19	21.92	0h	lineage-specific gene
OG0016851	DLAC_09226	KYQ90598	dl	0.89	7.91	27.38	24h	lineage-specific gene
OG0016881	DICPUDRAFT_152249	EGC35425	dp	0.99	8.05	38.62	24h	lineage-specific gene
OG0016897	DICPUDRAFT_158639	EGC29739	dp	1	0.21	1.06	24h	lineage-specific gene
OG0016900	DICPUDRAFT_158578	EGC29794	dp	0.97	9.73	43.91	24h	lineage-specific gene
OG0016904	DICPUDRAFT_158540	EGC29823	dp	0.94	37.87	153.26	0h	lineage-specific gene
OG0016930	DICPUDRAFT_76632	EGC37777	dp	1	49.61	244.8	12h	lineage-specific gene
OG0016931	DICPUDRAFT_91559	EGC37778	dp	0.99	138.63	671.28	12h	lineage-specific gene
OG0017005	DICPUDRAFT_98727	EGC32906	dp	0.99	24.87	119.86	24h	lineage-specific gene
OG0017033	DICPUDRAFT_96226	EGC40608	dp	0.99	389.52	1893.35	0h	lineage-specific gene
OG0017041	DICPUDRAFT_91857	EGC36296	dp	0.95	5.71	23.42	24h	lineage-specific gene
OG0017049	DICPUDRAFT_75950	EGC38463	dp	0.98	5.72	26.87	0h	lineage-specific gene
OG0017053	DICPUDRAFT_148854	EGC38441	dp	0.96	182.96	798.15	24h	lineage-specific gene
OG0017069	DICPUDRAFT_82214	EGC31944	dp	1	0.46	2.28	24h	lineage-specific gene
OG0017071	DICPUDRAFT_80458	EGC33762	dp	0.95	3.13	12.84	24h	lineage-specific gene
OG0017084	DICPUDRAFT_80158	EGC34065	dp	0.99	52.48	254.02	24h	lineage-specific gene
OG0017096	DICPUDRAFT_76760	EGC37658	dp	1	0.3	1.51	8h	lineage-specific gene
OG0017099	DICPUDRAFT_159266	EGC29188	dp	0.94	0.64	2.61	24h	lineage-specific gene
OG0017173	DICPUDRAFT_84964	EGC28984	dp	0.94	1.43	5.71	8h	lineage-specific gene
OG0017179	DICPUDRAFT_74835	EGC39644	dp	0.95	27.92	115.12	0h	lineage-specific gene
OG0017183	DICPUDRAFT_74842	EGC39649	dp	1	0.25	1.25	8h	lineage-specific gene
OG0017201	DICPUDRAFT_157613	EGC30613	dp	0.95	29.13	122.74	24h	lineage-specific gene
OG0017237	DICPUDRAFT_149247	EGC38085	dp	0.99	6.49	31.56	24h	lineage-specific gene
OG0017258	DICPUDRAFT_83274	EGC30801	dp	0.95	5.55	23.3	12h	lineage-specific gene
OG0017271	DICPUDRAFT_83669	EGC30390	dp	0.97	30.08	134.59	12h	lineage-specific gene
OG0017275	DICPUDRAFT_85570	EGC28325	dp	1	0.22	1.12	24h	lineage-specific gene
OG0017285	DICPUDRAFT_147534	EGC39674	dp	0.95	0.5	2.08	24h	lineage-specific gene
OG0017318	DICPUDRAFT_159694	EGC28809	dp	0.98	40.87	189.71	24h	lineage-specific gene
OG0017359	DICPUDRAFT_32615	EGC35896	dp	0.96	3.89	16.88	8h	lineage-specific gene
OG0017366	DICPUDRAFT_54918	EGC35907	dp	0.99	273.08	1330.21	24h	lineage-specific gene
OG0017369	DICPUDRAFT_92825	EGC31249	dp	1	1.05	5.23	20h	lineage-specific gene
OG0017377	DICPUDRAFT_82710	EGC31398	dp	0.97	5.4	23.84	12h	lineage-specific gene
OG0017378	DICPUDRAFT_156757	EGC31408	dp	0.99	37.65	177.68	24h	lineage-specific gene
OG0017379	DICPUDRAFT_92802	EGC31411	dp	0.96	108.62	472.39	24h	lineage-specific gene
OG0017380	DICPUDRAFT_151739	EGC35843	dp	1	0.51	2.53	8h	lineage-specific gene
OG0017427	DICPUDRAFT_91251	EGC39306	dp	0.98	65.59	304.15	24h	lineage-specific gene
OG0017436	DICPUDRAFT_159446	EGC29021	dp	1	0.48	2.39	20h	lineage-specific gene
OG0017455	DICPUDRAFT_78328	EGC35974	dp	0.96	0.79	3.46	24h	lineage-specific gene
OG0017470	DICPUDRAFT_81106	EGC33094	dp	0.98	66.75	308.97	12h	lineage-specific gene
OG0017476	DICPUDRAFT_154469	EGC33466	dp	1	0.29	1.47	20h	lineage-specific gene
OG0017490	DICPUDRAFT_79275	EGC35008	dp	1	0.72	3.58	12h	lineage-specific gene
OG0017497	DICPUDRAFT_92232	EGC34379	dp	0.97	65.23	290.03	8h	lineage-specific gene
OG0017582	DICPUDRAFT_158609	EGC29766	dp	0.99	21.46	102.15	24h	lineage-specific gene
OG0017605	DICPUDRAFT_77618	EGC36715	dp	0.97	2.96	13.25	24h	lineage-specific gene
OG0017626	DICPUDRAFT_151387	EGC36158	dp	0.97	8.48	38.26	24h	lineage-specific gene
OG0017657	DICPUDRAFT_149571	EGC37822	dp	0.98	1.67	7.82	0h	lineage-specific gene
OG0017664	DICPUDRAFT_153328	EGC34468	dp	1	0.51	2.56	12h	lineage-specific gene
OG0017676	DICPUDRAFT_153653	EGC34178	dp	1	0.32	1.6	0h	lineage-specific gene
OG0017682	DICPUDRAFT_148424	EGC38849	dp	0.94	134.31	546.14	8h	lineage-specific gene
OG0017716	DICPUDRAFT_159924	EGC28626	dp	1	0.64	3.18	20h	lineage-specific gene
OG0017717	DICPUDRAFT_159896	EGC28648	dp	0.96	25.82	110.01	12h	lineage-specific gene
OG0017756	DICPUDRAFT_80196	EGC34063	dp	1	7.03	35.15	0h	lineage-specific gene
OG0017780	DICPUDRAFT_82868	EGC31223	dp	0.95	0.91	3.83	24h	lineage-specific gene
OG0017789	DICPUDRAFT_147837	EGC39395	dp	1	17.63	86.44	24h	lineage-specific gene
OG0017793	DICPUDRAFT_84697	EGC29272	dp	1	0.32	1.59	20h	lineage-specific gene
OG0017795	DICPUDRAFT_159652	EGC28853	dp	0.99	23.39	110.79	0h	lineage-specific gene
OG0017859	DICPUDRAFT_154965	EGC33017	dp	1	0.32	1.59	0h	lineage-specific gene
OG0017865	DICPUDRAFT_159011	EGC29408	dp	1	0.38	1.9	8h	lineage-specific gene
OG0017866	DICPUDRAFT_159012	EGC29412	dp	1	0.52	2.6	8h	lineage-specific gene
OG0017885	DICPUDRAFT_40318	EGC31176	dp	0.94	0.99	4.04	8h	lineage-specific gene
OG0017886	DICPUDRAFT_82913	EGC31178	dp	1	0.43	2.14	20h	lineage-specific gene
OG0017898	DICPUDRAFT_156446	EGC31670	dp	0.94	4.05	16.61	0h	lineage-specific gene
OG0017923	DICPUDRAFT_82094	EGC32060	dp	0.95	19.3	81.6	8h	lineage-specific gene
OG0017944	DICPUDRAFT_160197	EGC28411	dp	1	0.96	4.78	20h	lineage-specific gene
OG0017945	DICPUDRAFT_85489	EGC28412	dp	1	0.44	2.18	8h	lineage-specific gene
OG0018007	DICPUDRAFT_96521	EGC39575	dp	0.94	68.88	280.69	24h	lineage-specific gene
OG0018013	DICPUDRAFT_157892	EGC30376	dp	1	0.42	2.08	24h	lineage-specific gene
OG0018019	DICPUDRAFT_152869	EGC34867	dp	0.98	11.53	53.74	24h	lineage-specific gene
OG0018023	DICPUDRAFT_82654	EGC31474	dp	0.97	13.39	58.84	24h	lineage-specific gene
OG0018033	DICPUDRAFT_157093	EGC31100	dp	1	108.4	537.44	24h	lineage-specific gene
OG0018045	DICPUDRAFT_158549	EGC29817	dp	0.94	1.51	6.09	24h	lineage-specific gene
OG0018075	DICPUDRAFT_74078	EGC40324	dp	0.97	0.5	2.26	24h	lineage-specific gene
OG0018107	DICPUDRAFT_152919	EGC34812	dp	1	0.37	1.85	20h	lineage-specific gene
OG0018108	DICPUDRAFT_34411	EGC34801	dp	1	7.58	37.64	24h	lineage-specific gene
OG0018123	DICPUDRAFT_159219	EGC29224	dp	0.96	8.05	34.86	24h	lineage-specific gene
OG0018124	DICPUDRAFT_149927	EGC37437	dp	0.99	234.63	1139.63	24h	lineage-specific gene
OG0018125	DICPUDRAFT_149928	EGC37438	dp	0.99	15.49	74.36	24h	lineage-specific gene
OG0018137	DICPUDRAFT_96465	EGC39764	dp	0.95	150	627.2	24h	lineage-specific gene
OG0018143	DICPUDRAFT_147472	EGC39774	dp	1	0.24	1.19	12h	lineage-specific gene
OG0018158	DICPUDRAFT_85319	EGC28600	dp	0.94	18.1	74.07	24h	lineage-specific gene
OG0018164	DICPUDRAFT_81588	EGC32585	dp	0.95	0.53	2.26	8h	lineage-specific gene
OG0018180	DICPUDRAFT_97147	EGC37713	dp	0.99	6.65	31.64	24h	lineage-specific gene
OG0018182	DICPUDRAFT_149642	EGC37739	dp	1	0.25	1.23	20h	lineage-specific gene
OG0018197	DICPUDRAFT_146965	EGC40147	dp	0.94	173.33	708.19	0h	lineage-specific gene
OG0018236	DICPUDRAFT_75407	EGC38991	dp	0.99	72.38	354.36	0h	lineage-specific gene
OG0018252	DICPUDRAFT_156891	EGC31285	dp	0.98	12.11	55.61	24h	lineage-specific gene
OG0018253	DICPUDRAFT_40169	EGC31286	dp	0.95	17	69.69	24h	lineage-specific gene
OG0018259	DICPUDRAFT_91779	EGC36779	dp	1	747.24	3690.44	24h	lineage-specific gene
OG0018271	DICPUDRAFT_75352	EGC39043	dp	1	2.08	10.41	8h	lineage-specific gene
OG0018281	DICPUDRAFT_81118	EGC33084	dp	1	0.23	1.13	12h	lineage-specific gene
OG0018307	DICPUDRAFT_83985	EGC30049	dp	0.99	9.21	43.76	0h	lineage-specific gene
OG0018321	DICPUDRAFT_91591	EGC37595	dp	1	631.12	3147.38	24h	lineage-specific gene
OG0018324	DICPUDRAFT_152622	EGC35080	dp	0.99	8.27	40.12	24h	lineage-specific gene
OG0018346	DICPUDRAFT_57957	EGC31040	dp	1	31.79	157.64	24h	lineage-specific gene
OG0018350	DICPUDRAFT_152790	EGC34922	dp	1	0.27	1.35	20h	lineage-specific gene
OG0018368	DICPUDRAFT_149193	EGC38169	dp	0.96	41.95	182.73	0h	lineage-specific gene
OG0018374	DICPUDRAFT_153725	EGC34107	dp	0.94	53.38	213.29	12h	lineage-specific gene
OG0018379	DICPUDRAFT_80135	EGC34126	dp	0.94	21.91	89.58	8h	lineage-specific gene
OG0018380	DICPUDRAFT_92012	EGC35519	dp	0.99	187.66	914.93	24h	lineage-specific gene
OG0018415	DICPUDRAFT_82731	EGC31392	dp	0.98	1.28	5.84	24h	lineage-specific gene
OG0018430	DICPUDRAFT_97781	EGC35828	dp	0.99	6.75	32.16	24h	lineage-specific gene
OG0018431	DICPUDRAFT_92154	EGC34734	dp	1	53.4	266.57	24h	lineage-specific gene
OG0018463	DICPUDRAFT_149841	EGC37525	dp	0.98	1.46	6.66	0h	lineage-specific gene
OG0018480	DICPUDRAFT_148957	EGC38360	dp	1	0.9	4.49	24h	lineage-specific gene
OG0018509	DICPUDRAFT_91876	EGC36226	dp	0.96	354.78	1519.75	12h	lineage-specific gene
OG0018524	DICPUDRAFT_78676	EGC35639	dp	0.94	5.63	22.5	24h	lineage-specific gene
OG0018525	DICPUDRAFT_152010	EGC35646	dp	1	0.22	1.08	24h	lineage-specific gene
OG0018550	DICPUDRAFT_81307	EGC32899	dp	0.98	15.73	73.14	0h	lineage-specific gene
OG0018556	DICPUDRAFT_77904	EGC36404	dp	0.97	12.94	57.52	24h	lineage-specific gene
OG0018583	DICPUDRAFT_168762	EGC33623	dp	1	0.3	1.49	8h	lineage-specific gene
OG0018595	DICPUDRAFT_79720	EGC34505	dp	1	0.21	1.03	0h	lineage-specific gene
OG0018600	DICPUDRAFT_153278	EGC34534	dp	0.95	19.39	81.36	24h	lineage-specific gene
OG0018613	DICPUDRAFT_155890	EGC32160	dp	1	0.25	1.25	24h	lineage-specific gene
OG0018633	DICPUDRAFT_76718	EGC37683	dp	0.97	1.92	8.52	24h	lineage-specific gene
OG0018637	DICPUDRAFT_157112	EGC31071	dp	0.94	4.17	17.07	24h	lineage-specific gene
OG0018644	DICPUDRAFT_77511	EGC36833	dp	0.94	4.74	19.41	0h	lineage-specific gene
OG0018653	DICPUDRAFT_150071	EGC37337	dp	0.94	2.55	10.29	8h	lineage-specific gene
OG0018658	DICPUDRAFT_154848	EGC33111	dp	1	42.92	214.19	24h	lineage-specific gene
OG0018661	DICPUDRAFT_77394	EGC36943	dp	0.99	4.25	20.25	24h	lineage-specific gene
OG0018677	DICPUDRAFT_152213	EGC35456	dp	0.95	298.25	1256.55	0h	lineage-specific gene
OG0018680	DICPUDRAFT_152216	EGC35459	dp	0.95	86.46	355.16	0h	lineage-specific gene
OG0018683	DICPUDRAFT_152219	EGC35462	dp	0.94	715.37	2886.15	0h	lineage-specific gene
OG0018697	DICPUDRAFT_159937	EGC28612	dp	1	0.36	1.82	20h	lineage-specific gene
OG0018705	DICPUDRAFT_81652	EGC32513	dp	1	0.43	2.15	8h	lineage-specific gene
OG0018738	DICPUDRAFT_158616	EGC29755	dp	1	0.49	2.45	0h	lineage-specific gene
OG0018742	DICPUDRAFT_84257	EGC29751	dp	0.96	20.98	91.56	12h	lineage-specific gene
OG0018757	DICPUDRAFT_160255	EGC28377	dp	0.96	27.56	120.4	12h	lineage-specific gene
OG0018768	DICPUDRAFT_149224	EGC38140	dp	0.94	11.69	47.86	0h	lineage-specific gene
OG0018794	DICPUDRAFT_148030	EGC39220	dp	1	0.31	1.57	20h	lineage-specific gene
OG0018808	DICPUDRAFT_156533	EGC31599	dp	0.94	3.88	15.56	0h	lineage-specific gene
OG0018834	DICPUDRAFT_79487	EGC34789	dp	0.97	1.21	5.45	24h	lineage-specific gene
OG0018848	DICPUDRAFT_157227	EGC30956	dp	1	0.59	2.96	8h	lineage-specific gene
OG0018877	DICPUDRAFT_73990	EGC40485	dp	1	0.26	1.29	20h	lineage-specific gene
OG0018915	DICPUDRAFT_91808	EGC36557	dp	0.96	119.39	518.73	12h	lineage-specific gene
OG0018916	DICPUDRAFT_77797	EGC36543	dp	0.94	152.9	613.77	12h	lineage-specific gene
OG0018917	DICPUDRAFT_150953	EGC36561	dp	1	0.3	1.51	8h	lineage-specific gene
OG0018928	DICPUDRAFT_160272	EGC28362	dp	0.94	19.32	77.92	24h	lineage-specific gene
OG0018939	DICPUDRAFT_147236	EGC39935	dp	1	0.38	1.89	8h	lineage-specific gene
OG0018961	DICPUDRAFT_157440	EGC30775	dp	1	0.2	1.01	0h	lineage-specific gene
OG0018968	DICPUDRAFT_146802	EGC40231	dp	1	0.21	1.03	8h	lineage-specific gene
OG0018980	DICPUDRAFT_146877	EGC40274	dp	0.97	4.99	22.08	24h	lineage-specific gene
OG0018983	DICPUDRAFT_74220	EGC40310	dp	1	0.85	4.25	0h	lineage-specific gene
OG0018984	DICPUDRAFT_71378	EGC40312	dp	0.99	12.02	58.08	24h	lineage-specific gene
OG0018991	DICPUDRAFT_151076	EGC36445	dp	1	1.42	7.1	24h	lineage-specific gene
OG0019007	DICPUDRAFT_83373	EGC30706	dp	0.97	1.17	5.25	24h	lineage-specific gene
OG0019028	DICPUDRAFT_87084	EGC37174	dp	0.97	43.13	195.64	0h	lineage-specific gene
OG0019038	DICPUDRAFT_76956	EGC37398	dp	0.96	29.99	129.15	0h	lineage-specific gene
OG0019051	DICPUDRAFT_159574	EGC28922	dp	1	0.4	1.99	24h	lineage-specific gene
OG0019064	DICPUDRAFT_158715	EGC29672	dp	1	0.35	1.74	0h	lineage-specific gene
OG0019076	DICPUDRAFT_22202	EGC33208	dp	0.99	21.5	103.93	24h	lineage-specific gene
OG0019082	DICPUDRAFT_154768	EGC33228	dp	1	0.42	2.11	12h	lineage-specific gene
OG0019084	DICPUDRAFT_78213	EGC36097	dp	0.98	0.98	4.62	0h	lineage-specific gene
OG0019098	DICPUDRAFT_82587	EGC31538	dp	0.99	11.35	55.01	0h	lineage-specific gene
OG0019130	DICPUDRAFT_71712	EGC38735	dp	1	85.7	423.35	24h	lineage-specific gene
OG0019138	DICPUDRAFT_154186	EGC33737	dp	1	0.23	1.16	20h	lineage-specific gene
OG0019150	DICPUDRAFT_82855	EGC31239	dp	0.94	1.16	4.72	12h	lineage-specific gene
OG0019158	DICPUDRAFT_154330	EGC33597	dp	0.97	3.49	15.41	24h	lineage-specific gene
OG0019179	DICPUDRAFT_158166	EGC30131	dp	1	0.46	2.31	24h	lineage-specific gene
OG0019188	DICPUDRAFT_77994	EGC36336	dp	1	0.5	2.49	0h	lineage-specific gene
OG0019195	DICPUDRAFT_148734	EGC38525	dp	1	1.11	5.53	24h	lineage-specific gene
OG0019199	DICPUDRAFT_75869	EGC38532	dp	0.95	66.76	273.95	24h	lineage-specific gene
OG0019223	DICPUDRAFT_41541	EGC30368	dp	0.94	143.28	584.97	0h	lineage-specific gene
OG0019227	DICPUDRAFT_159752	EGC28756	dp	1	0.41	2.03	20h	lineage-specific gene
OG0019259	DICPUDRAFT_75116	EGC39359	dp	0.94	3.63	14.62	8h	lineage-specific gene
OG0019270	DICPUDRAFT_159426	EGC29046	dp	0.94	5.98	24.37	0h	lineage-specific gene
OG0019298	DICPUDRAFT_160168	EGC28433	dp	1	0.56	2.79	24h	lineage-specific gene
OG0019313	DICPUDRAFT_147348	EGC39779	dp	1	0.5	2.48	8h	lineage-specific gene
OG0019354	DICPUDRAFT_151525	EGC36053	dp	0.96	0.41	1.77	8h	lineage-specific gene
OG0019367	DICPUDRAFT_149915	EGC37520	dp	0.94	3.69	14.77	24h	lineage-specific gene
OG0019368	DICPUDRAFT_154369	EGC33564	dp	0.98	35.95	167	0h	lineage-specific gene
OG0019391	DICPUDRAFT_99444	EGC30741	dp	1	579.31	2890.08	24h	lineage-specific gene
OG0019430	DICPUDRAFT_11157	EGC32052	dp	1	0.25	1.27	8h	lineage-specific gene
OG0019452	DICPUDRAFT_149800	EGC37564	dp	0.95	4.58	19.1	24h	lineage-specific gene
OG0019511	DICPUDRAFT_149409	EGC37944	dp	1	92.49	454.5	24h	lineage-specific gene
OG0019512	DICPUDRAFT_149410	EGC37945	dp	1	138.11	685.92	24h	lineage-specific gene
OG0019513	DICPUDRAFT_149411	EGC37946	dp	0.99	116.02	556.03	24h	lineage-specific gene
OG0019520	DICPUDRAFT_82472	EGC31653	dp	0.95	1.76	7.41	0h	lineage-specific gene
OG0019530	DICPUDRAFT_150128	EGC37286	dp	1	0.23	1.15	20h	lineage-specific gene
OG0019539	DICPUDRAFT_79843	EGC34406	dp	0.96	1.13	4.8	12h	lineage-specific gene
OG0019546	DICPUDRAFT_153408	EGC34412	dp	0.96	8.83	37.98	0h	lineage-specific gene
OG0019560	DICPUDRAFT_16183	EGC39104	dp	0.97	10.27	45.61	24h	lineage-specific gene
OG0019564	DICPUDRAFT_84288	EGC29716	dp	1	0.41	2.04	8h	lineage-specific gene
OG0019565	DICPUDRAFT_152467	EGC35210	dp	1	0.25	1.27	20h	lineage-specific gene
OG0019580	DICPUDRAFT_150357	EGC37095	dp	0.95	0.68	2.85	24h	lineage-specific gene
OG0019611	DICPUDRAFT_26732	EGC39528	dp	0.94	0.43	1.74	24h	lineage-specific gene
OG0019614	DICPUDRAFT_74953	EGC39534	dp	0.97	14.29	63.81	24h	lineage-specific gene
OG0019672	PPL_07641	EFA79589	pp	0.94	12.78	51	24h	lineage-specific gene
OG0019684	PPL_06527	EFA80588	pp	0.97	180.65	803	8h	lineage-specific gene
OG0019688	PPL_06545	EFA80606	pp	0.94	6.79	27.33	0h	lineage-specific gene
OG0019712	PPL_06619	EFA79800	pp	0.97	90.65	398.83	8h	lineage-specific gene
OG0019738	PPL_06699	EFA79879	pp	0.93	3.07	11.92	0h	lineage-specific gene
OG0019787	PPL_06872	EFA80051	pp	0.92	6.56	24.76	0h	lineage-specific gene
OG0019790	PPL_06878	EFA80056	pp	0.98	6.89	32.43	24h	lineage-specific gene
OG0019855	PPL_07203	EFA80369	pp	0.96	81.4	355.68	0h	lineage-specific gene
OG0019876	PPL_07303	EFA80468	pp	0.98	81.18	372.08	0h	lineage-specific gene
OG0019879	PPL_07321	EFA80486	pp	0.91	1.23	4.48	0h	lineage-specific gene
OG0019922	PPL_10864	EFA75809	pp	0.92	0.76	2.85	0h	lineage-specific gene
OG0019925	PPL_10892	EFA75837	pp	0.92	0.42	1.61	8h	lineage-specific gene
OG0019971	PPL_08600	EFA77955	pp	0.91	16.48	60.81	0h	lineage-specific gene
OG0019983	PPL_08655	EFA78010	pp	0.89	48.15	165.73	8h	lineage-specific gene
OG0019991	PPL_08674	EFA78029	pp	0.94	0.48	1.95	24h	lineage-specific gene
OG0019993	PPL_08683	EFA78037	pp	0.95	4.09	17.2	8h	lineage-specific gene
OG0020021	PPL_08767	EFA78119	pp	0.92	1.9	7.26	0h	lineage-specific gene
OG0020023	PPL_08778	EFA78129	pp	0.89	7.98	27.64	0h	lineage-specific gene
OG0020060	PPL_08910	EFA78259	pp	0.9	23.68	85.05	8h	lineage-specific gene
OG0020078	PPL_09004	EFA78353	pp	0.99	111.65	534.17	0h	lineage-specific gene
OG0020087	PPL_09045	EFA78394	pp	0.97	13.94	62.02	8h	lineage-specific gene
OG0020126	PPL_09260	EFA77762	pp	0.99	214.18	1020.67	0h	lineage-specific gene
OG0020129	PPL_09268	EFA77770	pp	0.95	38.99	162.2	0h	lineage-specific gene
OG0020186	PPL_06311	EFA80725	pp	0.96	1468.72	6240.65	0h	lineage-specific gene
OG0020188	PPL_06313	EFA80727	pp	0.92	38.52	146.33	24h	lineage-specific gene
OG0020196	PPL_06357	EFA80771	pp	0.97	39.57	179	0h	lineage-specific gene
OG0020244	PPL_12071	EFA77469	pp	0.9	67.81	243.28	0h	lineage-specific gene
OG0020274	PPL_12158	EFA77555	pp	0.97	6.85	31.06	8h	lineage-specific gene
OG0020307	PPL_12308	EFA77699	pp	0.99	403.03	1970.24	0h	lineage-specific gene
OG0020324	PPL_12373	EFA77165	pp	0.9	3.81	13.48	24h	lineage-specific gene
OG0020326	PPL_12380	EFA77172	pp	0.95	5.57	23.15	0h	lineage-specific gene
OG0020327	PPL_12381	EFA77173	pp	0.94	112.19	453.39	0h	lineage-specific gene
OG0020372	PPL_12586	EFA77373	pp	0.97	7.28	32.63	24h	lineage-specific gene
OG0020405	PPL_05921	EFA81085	pp	0.93	9.81	38.18	0h	lineage-specific gene
OG0020420	PPL_05981	EFA81144	pp	0.97	17.81	79.29	0h	lineage-specific gene
OG0020453	PPL_06110	EFA81270	pp	0.92	0.56	2.15	8h	lineage-specific gene
OG0020511	PPL_11733	EFA75048	pp	0.97	1.05	4.79	0h	lineage-specific gene
OG0020583	PPL_09676	EFA76924	pp	0.96	4.85	20.91	8h	lineage-specific gene
OG0020597	PPL_09720	EFA76968	pp	0.98	153.95	709.29	0h	lineage-specific gene
OG0020599	PPL_09724	EFA76972	pp	0.99	1129.96	5413.32	0h	lineage-specific gene
OG0020626	PPL_09787	EFA77034	pp	0.89	2.67	9.31	0h	lineage-specific gene
OG0020652	PPL_09902	EFA77147	pp	0.95	0.43	1.8	8h	lineage-specific gene
OG0020697	PPL_10511	EFA75937	pp	0.93	333.83	1322.05	8h	lineage-specific gene
OG0020773	PPL_00887	EFA85658	pp	0.96	68.8	297.31	0h	lineage-specific gene
OG0020797	PPL_00993	EFA85763	pp	0.93	5.57	21.81	0h	lineage-specific gene
OG0020803	PPL_01005	EFA85775	pp	0.89	6.46	22.28	0h	lineage-specific gene
OG0020876	PPL_01314	EFA86077	pp	0.89	0.65	2.25	0h	lineage-specific gene
OG0020903	PPL_00157	EFA86365	pp	0.97	14.01	63.61	0h	lineage-specific gene
OG0020937	PPL_00274	EFA86480	pp	0.97	11.13	49.57	0h	lineage-specific gene
OG0020951	PPL_00342	EFA86543	pp	0.97	48.78	217.66	0h	lineage-specific gene
OG0020968	PPL_00411	EFA86610	pp	0.98	12.36	56.92	0h	lineage-specific gene
OG0020969	PPL_00424	EFA86623	pp	0.93	1.09	4.28	0h	lineage-specific gene
OG0020990	PPL_00519	EFA86715	pp	0.92	0.91	3.4	24h	lineage-specific gene
OG0020998	PPL_00538	EFA86733	pp	0.99	92.31	438.67	0h	lineage-specific gene
OG0021004	PPL_00555	EFA86750	pp	0.95	217.31	900.41	24h	lineage-specific gene
OG0021011	PPL_00584	EFA86779	pp	0.92	66.87	253.69	8h	lineage-specific gene
OG0021021	PPL_00623	EFA86818	pp	0.89	0.45	1.55	0h	lineage-specific gene
OG0021037	PPL_00656	EFA86851	pp	0.95	8.81	36.53	24h	lineage-specific gene
OG0021073	PPL_00763	EFA86201	pp	0.94	48.95	197.46	0h	lineage-specific gene
OG0021103	PPL_06124	EFA80889	pp	0.96	34.94	153.06	8h	lineage-specific gene
OG0021143	PPL_04280	EFA82589	pp	0.91	9.51	34.81	0h	lineage-specific gene
OG0021151	PPL_04308	EFA82616	pp	0.9	12.74	45.08	0h	lineage-specific gene
OG0021162	PPL_04341	EFA82648	pp	0.93	27.84	108.02	0h	lineage-specific gene
OG0021166	PPL_04356	EFA82662	pp	0.99	143.06	696.09	0h	lineage-specific gene
OG0021193	PPL_04470	EFA82775	pp	0.98	12.13	57.19	0h	lineage-specific gene
OG0021197	PPL_04485	EFA82790	pp	0.98	1.38	6.34	24h	lineage-specific gene
OG0021213	PPL_04525	EFA82830	pp	0.98	67.68	309.01	0h	lineage-specific gene
OG0021254	PPL_05418	EFA81430	pp	0.93	21.78	85.29	0h	lineage-specific gene
OG0021310	PPL_05744	EFA81750	pp	0.98	25.09	114.51	0h	lineage-specific gene
OG0021315	PPL_05756	EFA81761	pp	0.92	94.35	356.46	0h	lineage-specific gene
OG0021324	PPL_05800	EFA81805	pp	1	0.26	1.3	24h	lineage-specific gene
OG0021328	PPL_11143	EFA75069	pp	0.95	0.35	1.43	20h	lineage-specific gene
OG0021331	PPL_11153	EFA75079	pp	0.92	2004.99	7568.07	0h	lineage-specific gene
OG0021332	PPL_11162	EFA75088	pp	0.9	13.44	47.39	0h	lineage-specific gene
OG0021349	PPL_11244	EFA75170	pp	0.92	0.89	3.34	0h	lineage-specific gene
OG0021363	PPL_11328	EFA75253	pp	0.93	72.05	282.45	8h	lineage-specific gene
OG0021367	PPL_11342	EFA75267	pp	0.92	6.48	24.2	0h	lineage-specific gene
OG0021379	PPL_11404	EFA75328	pp	0.89	11.42	40.17	0h	lineage-specific gene
OG0021392	PPL_11447	EFA75370	pp	0.95	165.75	691.06	0h	lineage-specific gene
OG0021411	PPL_11518	EFA75438	pp	0.96	2.44	10.66	24h	lineage-specific gene
OG0021412	PPL_11519	EFA75439	pp	0.9	18.96	67.8	0h	lineage-specific gene
OG0021436	PPL_03717	EFA82939	pp	0.89	2.27	7.92	0h	lineage-specific gene
OG0021474	PPL_03877	EFA83087	pp	0.94	48.19	196.52	0h	lineage-specific gene
OG0021492	PPL_03956	EFA83166	pp	0.95	3.23	13.51	0h	lineage-specific gene
OG0021539	PPL_04176	EFA83383	pp	0.89	9.32	32.7	24h	lineage-specific gene
OG0021584	PPL_11789	EFA74757	pp	0.9	60.44	213.36	0h	lineage-specific gene
OG0021663	PPL_10036	EFA76275	pp	0.89	13.27	46.24	0h	lineage-specific gene
OG0021668	PPL_10061	EFA76298	pp	0.95	31.27	131.66	8h	lineage-specific gene
OG0021683	PPL_10141	EFA76376	pp	0.94	10.88	43.81	0h	lineage-specific gene
OG0021734	PPL_10339	EFA76570	pp	0.97	1.74	7.92	0h	lineage-specific gene
OG0021763	PPL_05146	EFA81914	pp	0.9	14.02	50.12	0h	lineage-specific gene
OG0021773	PPL_05207	EFA81973	pp	0.94	17.44	70.65	0h	lineage-specific gene
OG0021781	PPL_05239	EFA82004	pp	0.95	2.75	11.37	0h	lineage-specific gene
OG0021793	PPL_10979	EFA75475	pp	0.9	64.37	230.31	24h	lineage-specific gene
OG0021815	PPL_11065	EFA75560	pp	0.92	6.6	24.73	24h	lineage-specific gene
OG0021878	PPL_01477	EFA85520	pp	0.9	19.62	69.73	0h	lineage-specific gene
OG0021888	PPL_01506	EFA85548	pp	0.99	20.07	97.39	24h	lineage-specific gene
OG0021899	PPL_01560	EFA84571	pp	0.97	14.51	65.45	0h	lineage-specific gene
OG0021909	PPL_01600	EFA84610	pp	0.97	28.77	129.11	0h	lineage-specific gene
OG0021921	PPL_01656	EFA84666	pp	0.92	1.22	4.55	0h	lineage-specific gene
OG0021967	PPL_01858	EFA84865	pp	0.92	5.66	21.29	0h	lineage-specific gene
OG0022020	PPL_02114	EFA85117	pp	0.91	0.8	2.89	0h	lineage-specific gene
OG0022034	PPL_02188	EFA85188	pp	0.94	2.53	10.11	0h	lineage-specific gene
OG0022045	PPL_02260	EFA85260	pp	0.95	341.61	1444.02	0h	lineage-specific gene
OG0022049	PPL_02268	EFA85268	pp	0.91	61.73	226.59	0h	lineage-specific gene
OG0022060	PPL_02296	EFA85295	pp	0.95	497.94	2069.4	0h	lineage-specific gene
OG0022072	PPL_02363	EFA85360	pp	0.89	260.82	894.06	8h	lineage-specific gene
OG0022089	PPL_02419	EFA85415	pp	0.99	51.22	246.44	0h	lineage-specific gene
OG0022091	PPL_02422	EFA85418	pp	0.91	47.53	176.17	8h	lineage-specific gene
OG0022125	PPL_02558	EFA84522	pp	0.96	85.81	364.07	0h	lineage-specific gene
OG0022174	PPL_07764	EFA79346	pp	0.93	0.27	1.08	8h	lineage-specific gene
OG0022189	PPL_07825	EFA79407	pp	0.96	12.67	53.71	0h	lineage-specific gene
OG0022191	PPL_07837	EFA79419	pp	0.96	0.77	3.3	0h	lineage-specific gene
OG0022192	PPL_07838	EFA79420	pp	0.93	2.12	8.4	8h	lineage-specific gene
OG0022231	PPL_08004	EFA79178	pp	0.94	20.58	81.92	0h	lineage-specific gene
OG0022299	PPL_08265	EFA78802	pp	0.89	63.04	216.19	0h	lineage-specific gene
OG0022364	PPL_08499	EFA79030	pp	0.93	6.77	26.59	0h	lineage-specific gene
OG0022375	PPL_11531	EFA74703	pp	0.94	6.21	25.34	24h	lineage-specific gene
OG0022385	PPL_07411	EFA79720	pp	0.94	5.91	24.22	0h	lineage-specific gene
OG0022396	PPL_07443	EFA79752	pp	0.98	0.5	2.3	20h	lineage-specific gene
OG0022434	PPL_02592	EFA83527	pp	0.98	8.44	38.42	0h	lineage-specific gene
OG0022452	PPL_02656	EFA83590	pp	0.94	31.85	129.14	0h	lineage-specific gene
OG0022482	PPL_02781	EFA83714	pp	0.91	0.37	1.38	8h	lineage-specific gene
OG0022513	PPL_02880	EFA83812	pp	0.94	35.64	141.86	24h	lineage-specific gene
OG0022549	PPL_03022	EFA83952	pp	0.98	40.77	188.34	0h	lineage-specific gene
OG0022563	PPL_03106	EFA84033	pp	0.96	23.53	102.53	0h	lineage-specific gene
OG0022584	PPL_03259	EFA84184	pp	0.95	21.09	88.08	0h	lineage-specific gene
OG0022609	PPL_03333	EFA84256	pp	0.89	7037.94	24704.3	0h	lineage-specific gene
OG0022610	PPL_03334	EFA84257	pp	0.97	166.35	731.34	0h	lineage-specific gene
OG0022631	PPL_03404	EFA84326	pp	0.97	4.25	19.14	0h	lineage-specific gene
OG0022676	PPL_04611	EFA82189	pp	0.97	25.81	116.33	0h	lineage-specific gene
OG0022697	PPL_04724	EFA82300	pp	0.89	0.7	2.42	8h	lineage-specific gene
OG0022719	PPL_04771	EFA82346	pp	0.89	131.65	451.86	8h	lineage-specific gene
OG0022722	PPL_04785	EFA82360	pp	0.91	28.51	105.26	0h	lineage-specific gene
OG0000000	DLAC_03359	KYR00201	dl	0.98	5.79	26.43	0h	shared paralog	NA
OG0000000	DLAC_04537	KYQ94243	dl	0.92	11.24	42.39	0h	shared paralog	NA
OG0000000	DLAC_05458	KYQ92870	dl	0.89	8.07	28.37	0h	shared paralog	NA
OG0000000	DLAC_07573	KYQ91779	dl	0.9	1.93	6.81	0h	shared paralog	NA
OG0000000	DLAC_09084	KYQ90461	dl	0.89	10.47	36.65	0h	shared paralog	NA
OG0000001	DICPUDRAFT_10592	EGC40584	dp	0.96	2.33	10.04	0h	shared paralog	NA
OG0000001	DICPUDRAFT_159993	EGC28568	dp	0.96	3.77	16.2	8h	shared paralog	NA
OG0000003	DICPUDRAFT_13859	EGC29482	dp	1	0.42	2.12	8h	shared paralog	NA
OG0000005	DICPUDRAFT_153496	EGC34294	dp	0.99	3.52	17	0h	shared paralog	NA
OG0000005	DICPUDRAFT_75698	EGC38761	dp	0.94	1.94	7.83	0h	shared paralog	NA
OG0000006	DFA_00924	EGG21051	df	0.87	17.56	58.32	24h	shared paralog	NA
OG0000006	DFA_01943	EGG22054	df	0.92	2.89	10.8	24h	shared paralog	NA
OG0000006	DFA_07213	EGG20096	df	0.81	4.49	12.72	24h	shared paralog	NA
OG0000006	DFA_08586	EGG17590	df	0.8	29.13	80.06	0h	shared paralog	NA
OG0000006	DFA_08816	EGG17815	df	0.9	0.43	1.55	24h	shared paralog	NA
OG0000006	PPL_05337	EFA81354	pp	0.93	1.61	6.2	0h	shared paralog	NA
OG0000010	DFA_06952	EGG19849	df	0.82	1.93	5.55	24h	shared paralog	NA
OG0000011	DDB_G0269234	EAL71967	dd	0.91	555.71	2058.6	0h	shared paralog	1
OG0000015	DFA_02259	EGG19016	df	0.79	381.33	1037.98	0h	shared paralog	NA
OG0000015	DLAC_00638	KYR03138	dl	0.91	150.21	557.08	0h	shared paralog	0.031585
OG0000015	DLAC_04485	KYQ94192	dl	0.88	514.93	1738.6	0h	shared paralog	NA
OG0000017	DDB_G0278519	EAL68432	dd	0.98	142.58	652.54	24h	shared paralog	NA
OG0000017	DDB_G0278537	EAL68441	dd	0.99	538.13	2577.04	24h	shared paralog	NA
OG0000017	DDB_G0280245	EAL67349	dd	0.9	540.98	1933.72	24h	shared paralog	NA
OG0000017	DDB_G0280277	EAL67365	dd	0.91	35.75	131.67	24h	shared paralog	NA
OG0000017	DFA_06727	EGG18060	df	0.84	29.21	89.43	24h	shared paralog	NA
OG0000017	DFA_06734	EGG18067	df	0.82	73.24	213.88	24h	shared paralog	NA
OG0000017	DFA_09418	EGG16387	df	0.87	30.64	101.18	24h	shared paralog	NA
OG0000017	DFA_11533	EGG13772	df	0.95	43.95	184.95	24h	shared paralog	NA
OG0000017	DFA_11534	EGG13773	df	0.97	30.63	138.06	24h	shared paralog	NA
OG0000017	DICPUDRAFT_78182	EGC36143	dp	0.96	34.64	147.64	24h	shared paralog	0.0621952
OG0000017	DICPUDRAFT_91080	EGC40149	dp	0.96	54.19	235.56	24h	shared paralog	NA
OG0000017	DICPUDRAFT_91241	EGC39322	dp	1	535.26	2672.51	24h	shared paralog	NA
OG0000017	DLAC_00480	KYR02993	dl	0.96	96.51	409.29	24h	shared paralog	NA
OG0000017	DLAC_02519	KYR00508	dl	0.99	1995.85	9688.28	24h	shared paralog	NA
OG0000017	DLAC_02532	KYR00521	dl	0.97	294.12	1317.43	24h	shared paralog	NA
OG0000017	DLAC_03762	KYQ99813	dl	0.96	613.18	2687.28	24h	shared paralog	NA
OG0000017	DLAC_07779	KYQ90906	dl	0.98	1735.37	8142.84	24h	shared paralog	NA
OG0000024	DICPUDRAFT_154953	EGC33050	dp	0.95	6.1	25.82	0h	shared paralog	NA
OG0000025	DDB_G0271362	EAL71811	dd	0.93	0.64	2.5	24h	shared paralog	0.00584841
OG0000026	DFA_00143	EGG19565	df	0.85	42.41	131.08	24h	shared paralog	NA
OG0000026	DFA_06744	EGG18077	df	0.93	5.13	19.96	0h	shared paralog	NA
OG0000026	DFA_07645	EGG16667	df	0.78	26.39	70.85	12h	shared paralog	NA
OG0000026	DLAC_06194	KYQ93498	dl	0.88	48.08	162.8	0h	shared paralog	NA
OG0000026	DLAC_08498	KYQ89928	dl	0.95	0.85	3.55	0h	shared paralog	NA
OG0000026	DLAC_11228	KYQ88510	dl	0.97	50.58	221.9	0h	shared paralog	NA
OG0000026	DLAC_11229	KYQ88511	dl	0.96	54.31	230.53	0h	shared paralog	0
OG0000030	DDB_G0273063	EAL70749	dd	0.94	604	2399.45	0h	shared paralog	NA
OG0000030	DICPUDRAFT_91146	EGC39787	dp	0.95	672.19	2827.8	8h	shared paralog	NA
OG0000030	PPL_01142	EFA85910	pp	0.99	3390.98	16437.4	0h	shared paralog	NA
OG0000030	PPL_03145	EFA84072	pp	0.98	425.04	1963.85	0h	shared paralog	NA
OG0000030	PPL_07180	EFA80347	pp	0.98	583.41	2729.75	0h	shared paralog	NA
OG0000030	PPL_11059	EFA75554	pp	0.98	1251.72	5835.82	0h	shared paralog	NA
OG0000030	PPL_11060	EFA75555	pp	0.98	1065.61	5024.68	0h	shared paralog	NA
OG0000033	DDB_G0279545	EAL67711	dd	0.99	3.68	17.7	24h	shared paralog	NA
OG0000033	DFA_02154	EGG19367	df	0.81	34.16	97.29	0h	shared paralog	NA
OG0000033	DFA_06440	EGG24290	df	0.86	16.8	53.35	0h	shared paralog	NA
OG0000033	DICPUDRAFT_52884	EGC39103	dp	0.98	134.02	622.33	24h	shared paralog	0.00147965
OG0000033	DICPUDRAFT_87430	EGC36389	dp	0.98	27.43	126.17	0h	shared paralog	NA
OG0000034	DICPUDRAFT_78007	EGC36341	dp	0.96	23.71	100.88	12h	shared paralog	0
OG0000041	DLAC_09649	KYQ89682	dl	0.94	4.76	19	0h	shared paralog	NA
OG0000046	DFA_07986	EGG17005	df	0.79	36.13	98.09	24h	shared paralog	1
OG0000046	DICPUDRAFT_37055	EGC33246	dp	0.96	40.51	174.05	24h	shared paralog	1
OG0000047	DDB_G0272298	EAL71301	dd	0.99	150.91	736.76	24h	shared paralog	0.23751
OG0000047	PPL_05734	EFA81740	pp	0.92	7.11	26.92	0h	shared paralog	NA
OG0000047	PPL_11857	EFA74824	pp	0.94	86.81	354.21	0h	shared paralog	4.07e-05
OG0000050	DICPUDRAFT_149192	EGC38168	dp	0.96	38.14	163.85	0h	shared paralog	NA
OG0000050	PPL_06918	EFA80096	pp	0.9	29.46	104.42	0h	shared paralog	0.00262515
OG0000050	PPL_09707	EFA76955	pp	0.9	0.94	3.41	0h	shared paralog	NA
OG0000051	DDB_G0294254	EAL60354	dd	0.96	0.61	2.58	20h	shared paralog	NA
OG0000053	DFA_01851	EGG21965	df	0.83	5.73	17.05	12h	shared paralog	0.0206141
OG0000053	DFA_05990	EGG23854	df	0.87	444.49	1453.63	8h	shared paralog	NA
OG0000053	PPL_04465	EFA82770	pp	0.93	92.24	358.1	0h	shared paralog	NA
OG0000053	PPL_10174	EFA76409	pp	0.97	10.13	44.45	0h	shared paralog	0.190986
OG0000057	DFA_11363	EGG13602	df	0.9	16.51	58.8	24h	shared paralog	NA
OG0000057	DLAC_07111	KYQ92263	dl	0.95	122.46	503.76	0h	shared paralog	NA
OG0000057	DLAC_09489	KYQ89541	dl	0.97	39.17	177.31	0h	shared paralog	NA
OG0000057	PPL_00261	EFA86468	pp	0.98	64.92	305.72	0h	shared paralog	NA
OG0000057	PPL_08574	EFA77929	pp	0.98	5.95	27.21	0h	shared paralog	0
OG0000059	DFA_00307	EGG19729	df	0.82	4.98	14.64	24h	shared paralog	NA
OG0000059	DFA_00309	EGG19731	df	0.88	16.06	53.59	8h	shared paralog	NA
OG0000059	DFA_00312	EGG19734	df	0.87	32.28	105.9	12h	shared paralog	NA
OG0000059	DFA_05858	EGG23724	df	0.86	139.81	446.72	24h	shared paralog	6.35937e-05
OG0000059	DFA_11967	EGG14198	df	0.87	1.63	5.31	24h	shared paralog	NA
OG0000059	PPL_01854	EFA84861	pp	0.91	305.53	1133.22	0h	shared paralog	0.149706
OG0000059	PPL_05194	EFA81960	pp	1	0.62	3.11	0h	shared paralog	NA
OG0000059	PPL_05195	EFA81961	pp	0.94	21.33	85.78	0h	shared paralog	NA
OG0000060	DDB_G0281407	EAL66685	dd	0.97	8.43	37.77	8h	shared paralog	NA
OG0000060	DDB_G0284659	EAL65099	dd	0.96	20.97	90.88	8h	shared paralog	NA
OG0000060	DICPUDRAFT_96306	EGC40191	dp	0.94	19.04	77.08	12h	shared paralog	0
OG0000060	DICPUDRAFT_96313	EGC40212	dp	0.95	15.79	65.69	12h	shared paralog	NA
OG0000061	PPL_11193	EFA75119	pp	0.94	39.19	158.57	0h	shared paralog	0
OG0000063	DDB_G0273389	EAL70912	dd	0.98	69.43	324.34	24h	shared paralog	NA
OG0000063	DFA_02795	EGG24552	df	0.83	106.39	319.07	24h	shared paralog	NA
OG0000063	DICPUDRAFT_96914	EGC38453	dp	0.98	22.1	100.64	24h	shared paralog	0.00100367
OG0000067	DDB_G0275079	EAL69820	dd	0.94	14.38	58.34	20h	shared paralog	0.112236
OG0000067	DDB_G0276003	EAL69458	dd	0.94	27.75	112.53	20h	shared paralog	NA
OG0000067	DDB_G0276587	EAL69150	dd	0.91	7.94	29.17	20h	shared paralog	NA
OG0000067	DDB_G0276953	EAL68978	dd	0.9	56.35	203.89	20h	shared paralog	NA
OG0000067	DDB_G0277119	EAL69061	dd	0.94	25.72	104.02	20h	shared paralog	NA
OG0000067	DDB_G0277123	EAL69063	dd	1	0.52	2.61	20h	shared paralog	1
OG0000067	DDB_G0277491	EAL68708	dd	0.96	17.74	75.67	20h	shared paralog	NA
OG0000067	DDB_G0280013	EAL67478	dd	0.96	21.04	90.18	20h	shared paralog	NA
OG0000067	DICPUDRAFT_55588	EGC34748	dp	0.94	171.04	694.43	0h	shared paralog	NA
OG0000067	DICPUDRAFT_91426	EGC38438	dp	0.95	219.73	924.17	0h	shared paralog	1
OG0000067	DLAC_07286	KYQ91527	dl	0.88	24.26	80.95	24h	shared paralog	NA
OG0000070	DDB_G0271376	EAL71818	dd	0.92	22.38	85.5	0h	shared paralog	0.00584841
OG0000073	DDB_G0271134	EAL71697	dd	0.98	42.63	195.44	24h	shared paralog	NA
OG0000073	DDB_G0271314	EAL71787	dd	0.99	63.06	308.54	24h	shared paralog	NA
OG0000073	DDB_G0284239	EAL65308	dd	0.97	31.02	139.86	24h	shared paralog	NA
OG0000073	DDB_G0286321	EAL64336	dd	0.96	32.4	138.35	8h	shared paralog	NA
OG0000073	DICPUDRAFT_40165	EGC31287	dp	0.97	10.52	46.33	24h	shared paralog	1
OG0000073	DICPUDRAFT_85868	EGC39972	dp	0.99	34.08	165.42	24h	shared paralog	NA
OG0000076	DFA_08680	EGG17684	df	0.82	1176.57	3396.03	20h	shared paralog	1
OG0000077	DICPUDRAFT_82764	EGC31347	dp	0.99	5.45	26.51	24h	shared paralog	NA
OG0000082	DDB_G0289129	EAL62872	dd	0.93	1.22	4.79	8h	shared paralog	0.0055141
OG0000082	DICPUDRAFT_54411	EGC36789	dp	0.94	94.8	378.82	0h	shared paralog	NA
OG0000082	DICPUDRAFT_75252	EGC39139	dp	0.95	14.91	62.95	0h	shared paralog	1
OG0000082	DICPUDRAFT_94229	EGC36788	dp	0.95	72.28	299.28	8h	shared paralog	NA
OG0000083	DFA_03266	EGG25020	df	0.79	7.05	19.36	24h	shared paralog	NA
OG0000083	PPL_06292	EFA80706	pp	0.99	17.81	84.01	0h	shared paralog	NA
OG0000083	PPL_10538	EFA75962	pp	0.95	8.99	36.93	0h	shared paralog	0
OG0000084	DFA_07667	EGG16689	df	0.87	65.18	215.88	0h	shared paralog	NA
OG0000084	DICPUDRAFT_41061	EGC30714	dp	1	0.24	1.2	8h	shared paralog	1
OG0000084	DLAC_04027	KYQ96730	dl	1	243.75	1197.91	24h	shared paralog	NA
OG0000090	DFA_10438	EGG15596	df	0.84	15.18	46.44	24h	shared paralog	1
OG0000090	DFA_10441	EGG15599	df	0.79	472.19	1274.72	0h	shared paralog	NA
OG0000090	PPL_01653	EFA84663	pp	1	930.61	4588.65	8h	shared paralog	1
OG0000090	PPL_10869	EFA75814	pp	0.97	419.29	1890.16	8h	shared paralog	NA
OG0000090	PPL_10872	EFA75817	pp	0.97	215.49	967.91	8h	shared paralog	1
OG0000094	DLAC_07353	KYQ91585	dl	0.89	1.15	4.04	20h	shared paralog	0.00227063
OG0000095	DFA_03900	EGG18406	df	0.93	350.25	1383.33	8h	shared paralog	0.00985636
OG0000095	DFA_03901	EGG18407	df	0.87	94.46	310.24	8h	shared paralog	NA
OG0000096	DFA_07281	EGG20161	df	0.79	23.69	64.46	12h	shared paralog	0
OG0000098	DICPUDRAFT_50425	EGC31064	dp	1	51.43	254.44	24h	shared paralog	1
OG0000099	DFA_11625	EGG13864	df	0.86	4475.48	14424.4	12h	shared paralog	0.0188414
OG0000103	DDB_G0289843	EAL62522	dd	0.97	0.63	2.76	8h	shared paralog	1
OG0000104	DDB_G0271740	EAL71560	dd	0.91	1.64	6.1	24h	shared paralog	NA
OG0000104	DDB_G0271780	EAL71580	dd	0.99	55.44	270.21	24h	shared paralog	NA
OG0000104	DDB_G0273155	EAL70795	dd	0.99	152.34	734.89	24h	shared paralog	NA
OG0000104	DFA_04496	EGG22378	df	0.85	4.16	13.14	24h	shared paralog	0.031585
OG0000104	DICPUDRAFT_47417	EGC35895	dp	0.99	53.89	263.85	24h	shared paralog	0.0005291
OG0000104	PPL_04831	EFA82406	pp	0.95	10.03	42.41	24h	shared paralog	0.010804
OG0000106	DDB_G0271042	EAL72871	dd	0.9	1.48	5.29	20h	shared paralog	2.22e-05
OG0000107	DICPUDRAFT_154393	EGC33553	dp	0.95	150.47	637.43	12h	shared paralog	0.384784
OG0000107	DLAC_04798	KYQ94493	dl	0.87	98.12	325.84	0h	shared paralog	NA
OG0000108	PPL_04271	EFA82581	pp	0.91	2.42	8.96	0h	shared paralog	0
OG0000108	PPL_08167	EFA78706	pp	0.94	2.85	11.54	0h	shared paralog	NA
OG0000108	PPL_08168	EFA78707	pp	0.97	10.12	45.61	0h	shared paralog	NA
OG0000109	DDB_G0282131	EAL66391	dd	0.92	2.02	7.58	0h	shared paralog	0.00584841
OG0000113	PPL_07659	EFA79241	pp	0.94	14.79	59.54	0h	shared paralog	0
OG0000120	DFA_08593	EGG17597	df	0.92	14.64	56.3	24h	shared paralog	NA
OG0000120	DFA_08594	EGG17598	df	0.84	47.68	146.88	24h	shared paralog	0.000131845
OG0000120	DLAC_00271	KYR02806	dl	0.92	42.91	161.47	24h	shared paralog	0.00745792
OG0000121	DLAC_11110	KYQ88409	dl	0.92	26.72	99.78	0h	shared paralog	NA
OG0000121	DLAC_11262	KYQ88538	dl	0.91	15.35	56.53	0h	shared paralog	NA
OG0000121	PPL_04618	EFA82196	pp	0.97	231.08	1018.89	0h	shared paralog	NA
OG0000121	PPL_04619	EFA82197	pp	0.95	252.54	1064.56	0h	shared paralog	0.0512394
OG0000123	DFA_08669	EGG17673	df	0.96	72.95	312.74	0h	shared paralog	0
OG0000123	PPL_11489	EFA75410	pp	0.97	45.02	202.7	0h	shared paralog	NA
OG0000123	PPL_12224	EFA77617	pp	0.97	21.05	94.55	0h	shared paralog	0
OG0000125	DICPUDRAFT_73266	EGC31218	dp	0.98	34.65	162.83	0h	shared paralog	1
OG0000125	DICPUDRAFT_87458	EGC36315	dp	0.97	19.67	86.85	0h	shared paralog	NA
OG0000125	PPL_06443	EFA80854	pp	0.91	0.71	2.6	24h	shared paralog	0.0879177
OG0000126	DFA_08705	EGG17709	df	0.83	1214.69	3621.75	0h	shared paralog	0
OG0000127	PPL_01400	EFA85443	pp	0.92	18.73	70.01	0h	shared paralog	0
OG0000128	DDB_G0268192	EAL73549	dd	0.92	1.15	4.42	0h	shared paralog	NA
OG0000128	DDB_G0269256	EAL71978	dd	0.94	13.05	53.12	0h	shared paralog	NA
OG0000128	DDB_G0269260	EAL71980	dd	1	0.29	1.44	8h	shared paralog	NA
OG0000128	DDB_G0269270	EAL71985	dd	0.97	1.78	7.86	0h	shared paralog	1
OG0000128	DDB_G0285273	EAL64800	dd	1	20.79	102.32	24h	shared paralog	0.624953
OG0000129	DLAC_00322	KYR02853	dl	0.97	21.44	94.03	0h	shared paralog	NA
OG0000129	DLAC_00335	KYR02864	dl	0.96	13.6	58.18	0h	shared paralog	1
OG0000129	DLAC_00336	KYR02865	dl	0.97	20.4	90.65	0h	shared paralog	NA
OG0000130	DICPUDRAFT_154923	EGC33069	dp	0.98	136.76	627.18	0h	shared paralog	0.0448806
OG0000132	DICPUDRAFT_158615	EGC29754	dp	1	1.08	5.4	0h	shared paralog	0.466223
OG0000132	DLAC_03568	KYQ99979	dl	0.87	19.14	63.67	24h	shared paralog	1
OG0000137	DFA_03932	EGG18438	df	0.83	0.71	2.11	12h	shared paralog	0.52082
OG0000137	PPL_10797	EFA75744	pp	0.9	1.33	4.7	8h	shared paralog	1
OG0000139	DLAC_10162	KYQ89487	dl	0.87	230.96	765.87	20h	shared paralog	1
OG0000149	DFA_01191	EGG21310	df	0.83	27.35	80.76	24h	shared paralog	NA
OG0000149	DFA_09193	EGG16166	df	0.84	256.89	790.96	24h	shared paralog	0.026735
OG0000149	DFA_09370	EGG16340	df	0.87	76.24	248.05	24h	shared paralog	NA
OG0000149	DICPUDRAFT_37318	EGC33061	dp	0.94	3.41	13.76	0h	shared paralog	1
OG0000149	DLAC_07384	KYQ91615	dl	0.89	12.22	42.19	0h	shared paralog	1
OG0000149	PPL_05051	EFA81819	pp	0.9	8.46	30.39	0h	shared paralog	0.401645
OG0000150	DDB_G0281973	EAL66408	dd	0.93	0.93	3.64	20h	shared paralog	0.124306
OG0000150	PPL_06777	EFA79956	pp	0.93	1.79	6.99	8h	shared paralog	0.165417
OG0000150	PPL_07610	EFA79559	pp	0.9	22.56	80.02	8h	shared paralog	NA
OG0000155	DFA_08829	EGG17828	df	0.9	1.18	4.22	24h	shared paralog	0.00707728
OG0000155	DFA_11102	EGG13341	df	0.94	427.64	1716.94	24h	shared paralog	NA
OG0000155	DLAC_02158	KYR01063	dl	0.9	5.43	19.25	0h	shared paralog	NA
OG0000155	DLAC_03874	KYQ99907	dl	0.97	253.33	1137.96	0h	shared paralog	NA
OG0000155	DLAC_06167	KYQ93474	dl	0.95	718.45	2979.19	0h	shared paralog	0.00118187
OG0000155	PPL_07259	EFA80425	pp	0.95	8	33.19	24h	shared paralog	0.00385681
OG0000156	DICPUDRAFT_149619	EGC37789	dp	0.94	11.7	47.55	0h	shared paralog	0.00639077
OG0000156	DLAC_09752	KYQ89784	dl	0.97	62.56	279.73	0h	shared paralog	0.0285802
OG0000156	PPL_11797	EFA74765	pp	0.89	0.77	2.64	24h	shared paralog	0.119497
OG0000158	DFA_05560	EGG23428	df	0.8	204.64	567.57	24h	shared paralog	NA
OG0000158	DFA_06395	EGG24245	df	0.83	32.43	97.44	24h	shared paralog	1.59608e-05
OG0000158	DFA_06396	EGG24246	df	0.87	17.18	56.25	24h	shared paralog	NA
OG0000161	DDB_G0287561	EAL63680	dd	0.99	44.74	217.83	24h	shared paralog	0.00041669
OG0000161	DICPUDRAFT_155555	EGC32476	dp	0.95	18.65	78.9	24h	shared paralog	8.14e-06
OG0000164	DDB_G0268438	EAL73672	dd	0.93	0.33	1.3	8h	shared paralog	0.19669
OG0000166	PPL_10542	EFA75966	pp	0.97	16.09	72.23	24h	shared paralog	0.341818
OG0000167	DFA_06306	EGG24160	df	0.78	8.7	23.32	12h	shared paralog	0.0563928
OG0000167	DICPUDRAFT_37788	EGC32778	dp	0.96	2.08	8.9	0h	shared paralog	NA
OG0000167	DICPUDRAFT_78565	EGC35758	dp	0.94	3.03	12.38	0h	shared paralog	NA
OG0000167	DICPUDRAFT_83371	EGC30701	dp	0.94	0.48	1.94	0h	shared paralog	0.19845
OG0000168	DDB_G0286957	EAL63976	dd	0.96	235.37	1016.48	12h	shared paralog	1
OG0000168	DDB_G0287047	EAL63888	dd	0.98	167.55	787.1	12h	shared paralog	1
OG0000168	DDB_G0295751	EEU04146	dd	1	0.23	1.16	8h	shared paralog	1
OG0000168	PPL_02056	EFA85060	pp	1	2.49	12.46	20h	shared paralog	1
OG0000172	PPL_04595	EFA82173	pp	0.99	17.09	81.01	8h	shared paralog	NA
OG0000172	PPL_04607	EFA82185	pp	0.92	1.11	4.23	8h	shared paralog	1
OG0000173	DLAC_00748	KYR01957	dl	0.93	10.55	40.66	24h	shared paralog	0
OG0000173	DLAC_00771	KYR01977	dl	0.96	7.62	32.35	24h	shared paralog	NA
OG0000174	DLAC_04029	KYQ96732	dl	0.98	50.61	233.15	0h	shared paralog	0.0512481
OG0000176	DLAC_01217	KYR02379	dl	0.91	2.41	8.98	0h	shared paralog	0
OG0000180	DDB_G0286503	EAL64178	dd	1	0.52	2.59	20h	shared paralog	0
OG0000181	DICPUDRAFT_159667	EGC28839	dp	0.94	11.47	46.44	24h	shared paralog	0.0209605
OG0000183	DDB_G0284207	EAL65292	dd	0.99	13.14	62.05	24h	shared paralog	1
OG0000183	DICPUDRAFT_149999	EGC37425	dp	0.97	2.15	9.68	24h	shared paralog	0.316473
OG0000184	DICPUDRAFT_159504	EGC28979	dp	0.94	1.82	7.29	0h	shared paralog	0.132336
OG0000190	DFA_03577	EGG25328	df	0.91	10.38	38.32	8h	shared paralog	0.0509543
OG0000190	PPL_01771	EFA84779	pp	0.99	18.88	90.39	0h	shared paralog	1
OG0000192	DFA_10213	EGG15379	df	0.94	8.38	33.73	24h	shared paralog	0.080478
OG0000192	DICPUDRAFT_98288	EGC34259	dp	0.94	32.04	129.73	24h	shared paralog	0.000381563
OG0000194	PPL_02350	EFA85347	pp	0.93	6.38	24.91	0h	shared paralog	NA
OG0000194	PPL_07618	EFA79567	pp	0.95	7.96	33.68	0h	shared paralog	0
OG0000195	PPL_00136	EFA86344	pp	0.89	15.75	54.22	0h	shared paralog	0.00185533
OG0000200	DDB_G0272783	EAL71029	dd	0.91	9.55	34.98	24h	shared paralog	0.379376
OG0000200	DFA_03818	EGG18324	df	0.84	26.96	81.81	8h	shared paralog	5.90806e-05
OG0000203	DICPUDRAFT_157204	EGC30983	dp	0.94	3.15	12.79	24h	shared paralog	0
OG0000204	DFA_08398	EGG17403	df	0.84	16.17	49.71	0h	shared paralog	0.129873
OG0000210	DFA_10752	EGG14879	df	0.84	15.16	46.53	24h	shared paralog	0.000818153
OG0000212	DICPUDRAFT_31231	EGC36830	dp	0.96	85.23	371.9	24h	shared paralog	0.00298691
OG0000215	PPL_05519	EFA81530	pp	0.9	3.96	14.11	0h	shared paralog	0.109189
OG0000217	DLAC_06779	KYQ91963	dl	1	11.13	54.63	0h	shared paralog	NA
OG0000217	DLAC_08931	KYQ90327	dl	0.95	13.27	55.61	0h	shared paralog	0.000727404
OG0000224	DDB_G0286873	EAL63994	dd	0.99	8.89	42.03	24h	shared paralog	0.000505241
OG0000225	PPL_12573	EFA77361	pp	0.93	5.07	19.81	0h	shared paralog	2.22e-05
OG0000226	DDB_G0292822	EAL60960	dd	0.98	17.99	82.85	24h	shared paralog	NA
OG0000226	DDB_G0292824	EAL60961	dd	0.99	161.78	763.48	24h	shared paralog	1
OG0000226	DDB_G0292826	EAL60962	dd	0.99	184.5	872.16	24h	shared paralog	0.656623
OG0000226	DFA_04325	EGG22207	df	0.92	65.24	247.2	20h	shared paralog	2.85614e-05
OG0000226	DICPUDRAFT_42897	EGC29419	dp	0.99	33.03	160.77	24h	shared paralog	NA
OG0000226	DICPUDRAFT_91044	EGC40285	dp	0.99	112.95	540.97	24h	shared paralog	0.000639571
OG0000226	PPL_00911	EFA85682	pp	0.99	74.09	359.62	24h	shared paralog	0.000407
OG0000227	DFA_00442	EGG20581	df	0.95	15.11	63.09	24h	shared paralog	NA
OG0000227	DFA_06730	EGG18063	df	0.93	0.7	2.78	24h	shared paralog	NA
OG0000227	DFA_07404	EGG20281	df	0.81	5.53	15.76	8h	shared paralog	NA
OG0000227	DFA_07951	EGG16970	df	0.94	37.51	152.48	24h	shared paralog	0.171313
OG0000227	DFA_08913	EGG17912	df	0.8	49.35	135.67	24h	shared paralog	NA
OG0000228	DLAC_06276	KYQ92313	dl	0.9	57.42	208.01	24h	shared paralog	1
OG0000233	DFA_09171	EGG16146	df	0.92	123.67	466.62	0h	shared paralog	8.14e-06
OG0000233	DLAC_08906	KYQ90304	dl	0.88	16.72	56.59	0h	shared paralog	0.706481
OG0000233	PPL_09746	EFA76994	pp	0.94	19.47	77.29	0h	shared paralog	0.700539
OG0000239	DFA_03762	EGG18270	df	0.9	12.35	43.72	0h	shared paralog	0.0031444
OG0000240	DFA_10590	EGG15747	df	0.86	2.43	7.82	24h	shared paralog	0.396146
OG0000240	DLAC_07914	KYQ91016	dl	0.91	21.95	80.33	24h	shared paralog	NA
OG0000240	DLAC_08006	KYQ91100	dl	0.95	13.81	57.88	24h	shared paralog	0.881113
OG0000246	DFA_02357	EGG19111	df	0.82	109.3	315.65	12h	shared paralog	0.0645998
OG0000246	DFA_02358	EGG19112	df	0.98	6.8	31.48	24h	shared paralog	NA
OG0000246	DFA_03365	EGG25119	df	0.89	2.75	9.65	24h	shared paralog	NA
OG0000246	DFA_07381	EGG20258	df	0.98	9.3	43.29	24h	shared paralog	NA
OG0000247	DFA_02445	EGG19197	df	0.78	95.93	257.7	24h	shared paralog	0.0136574
OG0000247	DFA_10257	EGG15422	df	0.86	312.08	998.5	24h	shared paralog	0.000407
OG0000248	DICPUDRAFT_75059	EGC39415	dp	0.96	1.75	7.52	12h	shared paralog	0.422656
OG0000249	DLAC_07204	KYQ91870	dl	0.9	1.8	6.37	20h	shared paralog	0.000264
OG0000249	PPL_05376	EFA81391	pp	0.95	0.3	1.24	24h	shared paralog	0.00446122
OG0000252	DFA_02020	EGG19235	df	0.96	9.33	40.29	24h	shared paralog	0.00147965
OG0000252	DFA_11410	EGG13649	df	0.81	0.43	1.23	24h	shared paralog	NA
OG0000261	DFA_00860	EGG20991	df	0.82	1045.15	3059.39	8h	shared paralog	0.14285
OG0000263	DFA_06716	EGG18049	df	0.91	20.33	74.62	24h	shared paralog	0.0469955
OG0000263	DLAC_00995	KYR02180	dl	0.92	46.58	177.73	0h	shared paralog	0.00191871
OG0000264	DICPUDRAFT_146743	EGC40383	dp	0.97	37.6	167.27	0h	shared paralog	NA
OG0000264	DICPUDRAFT_74088	EGC40331	dp	0.95	16.52	68.29	0h	shared paralog	0.000360633
OG0000265	PPL_01101	EFA85869	pp	0.94	32.16	130.28	0h	shared paralog	0
OG0000266	DFA_01515	EGG21629	df	0.83	18.63	55.68	24h	shared paralog	0.000327714
OG0000266	DICPUDRAFT_31893	EGC36419	dp	0.98	70.92	328.48	0h	shared paralog	0
OG0000269	PPL_04786	EFA82361	pp	0.94	63.69	257.81	0h	shared paralog	0.0514226
OG0000269	PPL_11839	EFA74806	pp	0.89	145.3	499.3	0h	shared paralog	NA
OG0000277	DDB_G0283585	EAL65670	dd	0.9	104.34	375.15	24h	shared paralog	0.132325
OG0000277	DFA_10066	EGG15234	df	0.88	120.86	406.78	8h	shared paralog	1
OG0000279	PPL_05392	EFA81407	pp	0.9	0.47	1.72	24h	shared paralog	0
OG0000287	PPL_09869	EFA77116	pp	0.91	50.15	186.24	24h	shared paralog	0.0505692
OG0000288	DICPUDRAFT_150187	EGC37264	dp	0.95	3.86	16.19	0h	shared paralog	1
OG0000290	DFA_11173	EGG13412	df	0.82	4.09	11.88	0h	shared paralog	0.11563
OG0000292	DFA_06298	EGG24152	df	0.8	65.26	181.73	8h	shared paralog	0.000339167
OG0000293	PPL_02049	EFA85053	pp	0.99	3.38	16.45	24h	shared paralog	0.031585
OG0000294	DFA_07268	EGG20148	df	0.85	126.35	399.01	12h	shared paralog	8.37941e-05
OG0000299	DICPUDRAFT_87385	EGC36527	dp	0.97	11.64	52.73	0h	shared paralog	0.19845
OG0000299	DLAC_01541	KYR01547	dl	0.87	4.44	14.81	0h	shared paralog	NA
OG0000299	DLAC_08844	KYQ90242	dl	0.92	33.05	126.75	0h	shared paralog	0.00509357
OG0000300	DICPUDRAFT_93986	EGC37831	dp	0.96	773.13	3353.79	8h	shared paralog	8.14e-06
OG0000302	DFA_08189	EGG17202	df	0.79	21.74	58.46	0h	shared paralog	6.88769e-05
OG0000303	DDB_G0284395	EAL65246	dd	0.9	2.51	8.86	20h	shared paralog	0.924146
OG0000304	DFA_01868	EGG21982	df	0.79	85.23	230.39	12h	shared paralog	0.692699
OG0000307	DDB_G0292028	EAL61370	dd	0.91	22.84	83.47	0h	shared paralog	0
OG0000308	PPL_04409	EFA82714	pp	0.93	62.68	246.46	0h	shared paralog	0.124306
OG0000309	DFA_09081	EGG16537	df	0.91	54.87	204.18	8h	shared paralog	0.00311589
OG0000309	DICPUDRAFT_54248	EGC37072	dp	0.99	62.96	304.95	24h	shared paralog	0
OG0000312	DDB_G0272893	EAL71084	dd	0.93	1673.08	6448.52	0h	shared paralog	1
OG0000315	DFA_02591	EGG18852	df	0.83	2.04	6.08	20h	shared paralog	NA
OG0000315	DFA_02762	EGG24519	df	0.87	8.84	29.46	24h	shared paralog	NA
OG0000315	DFA_03205	EGG24960	df	0.82	141.84	408.79	0h	shared paralog	1
OG0000315	DFA_07452	EGG20328	df	0.78	5.72	15.36	24h	shared paralog	NA
OG0000315	DICPUDRAFT_88463	EGC34142	dp	0.95	95.24	391.5	0h	shared paralog	1
OG0000317	DDB_G0276725	EAL69066	dd	1	0.44	2.2	20h	shared paralog	1
OG0000318	DICPUDRAFT_98336	EGC34125	dp	0.96	17.22	74.68	0h	shared paralog	0.00812372
OG0000320	DLAC_11625	KYQ92832	dl	0.89	1.03	3.56	24h	shared paralog	0.112236
OG0000330	DDB_G0287227	EAL63815	dd	0.93	338.76	1318.04	0h	shared paralog	0.119494
OG0000334	DICPUDRAFT_80612	EGC33634	dp	1	0.5	2.51	0h	shared paralog	0.0002035
OG0000335	DLAC_08552	KYQ89981	dl	0.89	20.17	69.89	0h	shared paralog	0.00812372
OG0000337	DDB_G0271366	EAL71813	dd	0.95	3.4	14.24	20h	shared paralog	1
OG0000337	DDB_G0271368	EAL71814	dd	0.93	7.49	29.05	20h	shared paralog	NA
OG0000337	DDB_G0279581	EAL67729	dd	0.93	0.26	1.02	20h	shared paralog	NA
OG0000337	DDB_G0288885	EAL62966	dd	0.94	0.32	1.3	20h	shared paralog	NA
OG0000338	DDB_G0289205	EAL62836	dd	0.93	7.33	28.83	0h	shared paralog	0.0466475
OG0000340	DLAC_00749	KYR01958	dl	0.95	27.89	115.97	24h	shared paralog	1
OG0000342	PPL_11169	EFA75095	pp	0.93	1.11	4.3	0h	shared paralog	0.125668
OG0000346	DICPUDRAFT_92909	EGC30797	dp	0.95	14.25	59.37	24h	shared paralog	0.0399483
OG0000350	PPL_07249	EFA80415	pp	0.91	1.13	4.15	0h	shared paralog	0.000299895
OG0000355	DICPUDRAFT_157044	EGC31120	dp	0.99	2.41	11.45	0h	shared paralog	0.00088319
OG0000359	DDB_G0272030	EAL71449	dd	0.94	139.94	563.29	0h	shared paralog	0.00700438
OG0000359	DDB_G0282171	EAL66365	dd	0.93	91.39	352.13	0h	shared paralog	NA
OG0000366	DICPUDRAFT_84366	EGC29616	dp	0.96	55.02	234.83	12h	shared paralog	0.000746866
OG0000367	PPL_08153	EFA78692	pp	0.9	19.04	67.96	0h	shared paralog	0.080478
OG0000370	PPL_10543	EFA75967	pp	0.9	8.91	31.61	0h	shared paralog	0.0999034
OG0000377	DFA_09285	EGG16255	df	0.94	12.69	50.54	8h	shared paralog	2.22e-05
OG0000378	DFA_03882	EGG18388	df	0.88	13.4	44.94	0h	shared paralog	0.000463791
OG0000378	PPL_00802	EFA86240	pp	0.94	0.29	1.14	0h	shared paralog	1
OG0000382	DDB_G0287293	EAL63714	dd	1	193.98	959.64	24h	shared paralog	0.317997
OG0000382	DDB_G0287549	EAL63674	dd	0.98	59.43	270.64	24h	shared paralog	0.0145766
OG0000382	DDB_G0287583	EAL63600	dd	0.99	83.79	409.93	24h	shared paralog	1
OG0000382	DDB_G0287687	EAL63490	dd	1	48.28	237.14	24h	shared paralog	0.0528294
OG0000382	DICPUDRAFT_150791	EGC36684	dp	1	27.86	137.89	24h	shared paralog	NA
OG0000382	DICPUDRAFT_35246	EGC34302	dp	0.97	9.77	44.28	24h	shared paralog	1
OG0000384	DICPUDRAFT_7275	EGC31775	dp	0.96	4.9	21.14	24h	shared paralog	0.447565
OG0000386	DDB_G0291137	EAL61852	dd	0.91	6.23	23.09	0h	shared paralog	0.0451638
OG0000386	DICPUDRAFT_147060	EGC40073	dp	0.96	111.29	478.02	0h	shared paralog	NA
OG0000386	DICPUDRAFT_153511	EGC34303	dp	0.95	160.73	678.06	0h	shared paralog	0.00214305
OG0000388	DICPUDRAFT_13500	EGC31527	dp	1	0.21	1.05	20h	shared paralog	0.0270211
OG0000392	PPL_09226	EFA78574	pp	0.92	5.18	19.48	0h	shared paralog	0.580541
OG0000393	PPL_08210	EFA78749	pp	0.97	38.53	173.32	0h	shared paralog	0.00246323
OG0000395	DFA_10688	EGG14815	df	0.91	13.2	47.95	24h	shared paralog	1
OG0000397	DDB_G0293670	EAL60647	dd	0.91	15.88	58.93	24h	shared paralog	1
OG0000397	DFA_09734	EGG16062	df	0.81	3.52	10.03	24h	shared paralog	0.494664
OG0000406	DDB_G0273249	EAL70842	dd	0.94	581.11	2326.66	0h	shared paralog	1
OG0000407	DDB_G0292060	EAL61386	dd	1	0.66	3.29	20h	shared paralog	8.14e-06
OG0000407	DICPUDRAFT_80548	EGC33699	dp	1	0.85	4.26	24h	shared paralog	0.857805
OG0000411	DFA_07515	EGG20391	df	0.86	191.23	614.65	24h	shared paralog	8.14e-06
OG0000421	DDB_G0277201	EAL68786	dd	0.94	23.81	96.5	0h	shared paralog	0.0559349
OG0000421	DFA_04803	EGG22673	df	0.92	53.86	201.65	8h	shared paralog	0.204482
OG0000421	DICPUDRAFT_53299	EGC38434	dp	0.94	52.59	212.44	24h	shared paralog	0.00446158
OG0000421	DICPUDRAFT_55507	EGC34905	dp	0.96	203.39	880.78	8h	shared paralog	NA
OG0000423	PPL_00444	EFA86643	pp	0.91	108.86	402.26	0h	shared paralog	NA
OG0000423	PPL_02299	EFA85298	pp	0.93	15.47	60.99	0h	shared paralog	0.000842778
OG0000431	DLAC_02981	KYR00917	dl	0.89	33.54	114.99	24h	shared paralog	0.483714
OG0000434	DFA_04000	EGG18506	df	0.95	28.41	120.32	24h	shared paralog	NA
OG0000434	DFA_05341	EGG23209	df	0.86	710.17	2259.72	8h	shared paralog	0.358319
OG0000435	DFA_09191	EGG16164	df	0.87	13.65	44.57	24h	shared paralog	8.14e-06
OG0000437	DICPUDRAFT_28723	EGC38392	dp	0.97	0.23	1.03	20h	shared paralog	1
OG0000439	PPL_03258	EFA84183	pp	0.95	0.46	1.92	0h	shared paralog	0.00812372
OG0000440	DFA_10219	EGG15385	df	0.86	165.49	529.04	24h	shared paralog	0.9327
OG0000450	DDB_G0267920	EAL73413	dd	1	0.25	1.27	20h	shared paralog	1
OG0000450	DICPUDRAFT_25409	EGC40292	dp	1	1.14	5.68	8h	shared paralog	1
OG0000450	DICPUDRAFT_36298	EGC33695	dp	1	0.33	1.67	0h	shared paralog	NA
OG0000457	DFA_04406	EGG22288	df	0.85	87.86	277.57	24h	shared paralog	0.316473
OG0000462	PPL_05216	EFA81982	pp	0.93	58.37	230.89	0h	shared paralog	0.000426153
OG0000467	DICPUDRAFT_38410	EGC32423	dp	0.98	214.26	987.46	24h	shared paralog	0.00643175
OG0000470	DDB_G0285053	EAL64990	dd	0.97	46.28	204.56	24h	shared paralog	0.00068271
OG0000470	DFA_06886	EGG19785	df	0.93	8.29	32.09	24h	shared paralog	0.00169148
OG0000473	DICPUDRAFT_91024	EGC40503	dp	0.96	32.85	143.3	24h	shared paralog	0.031585
OG0000475	DFA_01480	EGG21594	df	0.84	29.36	88.8	12h	shared paralog	0.00257197
OG0000475	DFA_05949	EGG23813	df	0.84	1.15	3.51	24h	shared paralog	NA
OG0000475	DFA_08280	EGG17287	df	0.85	5.56	17.19	24h	shared paralog	NA
OG0000483	DICPUDRAFT_150613	EGC36823	dp	0.96	44.51	188.66	0h	shared paralog	0.112236
OG0000487	DFA_05382	EGG23250	df	0.85	13.65	43.11	12h	shared paralog	0.0031435
OG0000492	DICPUDRAFT_32822	EGC35784	dp	0.99	31.84	151.12	0h	shared paralog	1
OG0000492	PPL_04610	EFA82188	pp	0.93	4.85	19.11	0h	shared paralog	0.19669
OG0000496	PPL_08826	EFA78176	pp	0.89	383.17	1325.76	0h	shared paralog	0.000949667
OG0000496	PPL_09259	EFA77761	pp	0.92	313.62	1173.01	0h	shared paralog	0.199252
OG0000497	DFA_11599	EGG13838	df	0.85	53.59	169.4	8h	shared paralog	1
OG0000499	PPL_09973	EFA76212	pp	0.95	37.42	157.05	0h	shared paralog	0.00185533
OG0000506	PPL_02448	EFA84416	pp	0.9	48.37	172.21	8h	shared paralog	0.129777
OG0000510	DFA_08188	EGG17201	df	0.8	3.53	9.81	0h	shared paralog	0
OG0000514	DICPUDRAFT_5964	EGC29493	dp	0.95	3.89	16.09	8h	shared paralog	0.119497
OG0000518	PPL_02795	EFA83728	pp	0.92	70.38	265.51	0h	shared paralog	0.297956
OG0000522	DLAC_06972	KYQ92131	dl	0.92	1570.5	5925.41	0h	shared paralog	1
OG0000522	PPL_03253	EFA84179	pp	0.89	20.75	72.44	0h	shared paralog	0.0224588
OG0000523	PPL_05205	EFA81971	pp	0.98	6.04	28.37	0h	shared paralog	0.00251919
OG0000526	DDB_G0284549	EAL65201	dd	0.96	62.27	264.02	0h	shared paralog	1
OG0000526	DICPUDRAFT_88764	EGC33441	dp	0.98	22.48	103.94	24h	shared paralog	0.80964
OG0000526	PPL_11264	EFA75190	pp	0.89	60.69	210.2	0h	shared paralog	0.0209605
OG0000528	DLAC_05792	KYQ93160	dl	0.88	7.28	24.52	24h	shared paralog	0.000737687
OG0000534	DFA_03278	EGG25032	df	0.85	33.14	103.58	8h	shared paralog	0
OG0000542	DLAC_07893	KYQ91000	dl	0.9	13.05	46.81	0h	shared paralog	0.172292
OG0000547	DICPUDRAFT_159898	EGC28644	dp	0.94	11.59	46.58	0h	shared paralog	1
OG0000551	DICPUDRAFT_156660	EGC31504	dp	0.97	2.11	9.52	0h	shared paralog	1
OG0000553	DFA_00443	EGG20582	df	0.97	10.75	48.35	24h	shared paralog	9.43768e-05
OG0000555	DICPUDRAFT_74921	EGC39516	dp	0.97	9.49	42.55	24h	shared paralog	0.00773021
OG0000556	DLAC_00152	KYR02693	dl	0.96	25.23	109.74	0h	shared paralog	1
OG0000560	DLAC_03573	KYQ99984	dl	0.88	1.84	6.27	0h	shared paralog	0.387666
OG0000564	PPL_00646	EFA86841	pp	0.91	5.25	19.53	24h	shared paralog	0
OG0000568	PPL_09031	EFA78380	pp	0.9	29.71	105.52	0h	shared paralog	0.231205
OG0000574	DICPUDRAFT_96381	EGC39955	dp	1	63.05	310.86	24h	shared paralog	8.14e-06
OG0000576	DLAC_07613	KYQ91818	dl	0.88	19.27	64.38	0h	shared paralog	1
OG0000577	DICPUDRAFT_93366	EGC40412	dp	0.96	21.88	93.95	0h	shared paralog	0.169084
OG0000588	PPL_02772	EFA83705	pp	0.99	45.33	221.89	8h	shared paralog	0
OG0000589	DFA_01286	EGG21403	df	0.8	14.67	41.14	8h	shared paralog	6.35937e-05
OG0000592	DLAC_03808	KYQ99855	dl	0.92	24.12	90.65	0h	shared paralog	0.000256466
OG0000595	DFA_10841	EGG14967	df	0.83	532	1582.34	0h	shared paralog	0.00446158
OG0000597	DFA_02753	EGG24510	df	0.86	20.11	64.76	24h	shared paralog	0.113977
OG0000597	DLAC_01080	KYR02250	dl	0.96	23.65	102.22	0h	shared paralog	0.642498
OG0000598	PPL_00044	EFA74546	pp	0.96	26.39	115.05	0h	shared paralog	0
OG0000599	DFA_09564	EGG15895	df	0.84	546.25	1657.35	0h	shared paralog	0
OG0000601	DICPUDRAFT_159950	EGC28604	dp	0.95	15.14	62.65	0h	shared paralog	1
OG0000604	DICPUDRAFT_44248	EGC28448	dp	0.97	5.12	22.63	24h	shared paralog	0.642379
OG0000604	DICPUDRAFT_52429	EGC39784	dp	0.96	3.77	15.96	0h	shared paralog	NA
OG0000608	DICPUDRAFT_28130	EGC38754	dp	0.97	172.9	774.66	0h	shared paralog	1
OG0000609	PPL_02546	EFA84510	pp	0.9	30.98	109.38	0h	shared paralog	0.00147965
OG0000611	DFA_04871	EGG22741	df	0.98	0.3	1.37	24h	shared paralog	0
OG0000615	DICPUDRAFT_91455	EGC38301	dp	0.94	6.04	24.15	24h	shared paralog	0.000131845
OG0000618	DICPUDRAFT_39626	EGC31657	dp	0.97	23.04	104.24	24h	shared paralog	0.0712977
OG0000621	DICPUDRAFT_54296	EGC36937	dp	0.99	54.18	256.91	24h	shared paralog	0.00794065
OG0000625	DDB_G0279355	EAL67826	dd	0.97	4.2	18.81	24h	shared paralog	1
OG0000626	DDB_G0282193	EAL66302	dd	0.98	23.38	109.41	24h	shared paralog	0.00959011
OG0000633	DFA_03211	EGG24966	df	0.93	1.89	7.47	24h	shared paralog	1
OG0000645	PPL_07860	EFA79442	pp	0.95	9.88	41.62	0h	shared paralog	0
OG0000646	DFA_10720	EGG14847	df	0.8	40.54	111.74	12h	shared paralog	0.0120665
OG0000654	DFA_01749	EGG21863	df	0.84	474.29	1439.69	8h	shared paralog	0
OG0000656	DFA_05535	EGG23403	df	0.92	135.06	515.79	0h	shared paralog	0.0176046
OG0000657	DFA_02099	EGG19312	df	0.84	3.95	12.15	0h	shared paralog	0
OG0000659	DICPUDRAFT_158384	EGC29960	dp	0.95	124.11	515.4	0h	shared paralog	0.00257197
OG0000675	DFA_01620	EGG21734	df	0.79	16.43	44.41	24h	shared paralog	NA
OG0000675	DFA_06361	EGG24214	df	0.91	56.05	206.85	24h	shared paralog	0.0114827
OG0000676	PPL_04947	EFA82042	pp	0.92	4.16	15.99	8h	shared paralog	0.125668
OG0000677	DLAC_06663	KYQ92668	dl	0.88	0.81	2.72	24h	shared paralog	0.495464
OG0000696	DLAC_05151	KYQ93761	dl	0.91	8.34	30.37	0h	shared paralog	NA
OG0000696	DLAC_09754	KYQ89786	dl	0.92	76.58	288.44	0h	shared paralog	0.0514226
OG0000698	PPL_05969	EFA81132	pp	0.92	19.29	73.9	0h	shared paralog	0.0906184
OG0000708	DICPUDRAFT_76800	EGC37622	dp	0.99	1.64	7.93	24h	shared paralog	0.719877
OG0000709	PPL_00174	EFA86382	pp	0.98	1422.1	6492.7	0h	shared paralog	0.00157147
OG0000709	PPL_10748	EFA75695	pp	0.97	72.34	318.92	0h	shared paralog	NA
OG0000717	DDB_G0290667	EAL62194	dd	0.9	12.25	43.82	8h	shared paralog	0.642379
OG0000720	DICPUDRAFT_20816	EGC32256	dp	0.99	3.31	15.73	0h	shared paralog	1
OG0000741	PPL_07877	EFA79459	pp	0.92	19.23	73.87	24h	shared paralog	0.578951
OG0000742	DLAC_09971	KYQ89312	dl	0.88	133.51	451.06	24h	shared paralog	0.479148
OG0000746	DICPUDRAFT_36244	EGC33744	dp	0.94	11.38	46.32	8h	shared paralog	0.384784
OG0000749	PPL_08292	EFA78828	pp	0.99	2298.1	10965	0h	shared paralog	0.00632885
OG0000757	DICPUDRAFT_152519	EGC35169	dp	0.96	4.23	18.12	24h	shared paralog	NA
OG0000757	DICPUDRAFT_79102	EGC35168	dp	0.99	10.19	49.35	24h	shared paralog	0.0621952
OG0000766	DFA_06448	EGG24298	df	0.89	227.48	779.72	12h	shared paralog	0.518813
OG0000766	PPL_06803	EFA79982	pp	0.96	8.63	36.74	24h	shared paralog	1
OG0000768	DFA_00997	EGG21122	df	0.99	155.33	760.15	24h	shared paralog	0
OG0000768	DFA_03926	EGG18432	df	0.91	566.55	2055.46	8h	shared paralog	NA
OG0000768	PPL_01413	EFA85456	pp	0.98	25.06	113.95	24h	shared paralog	0
OG0000773	DDB_G0292380	EAL61169	dd	0.91	60.76	221.52	0h	shared paralog	0.0005291
OG0000781	DLAC_09391	KYQ90753	dl	0.99	96.12	468.66	0h	shared paralog	0.902378
OG0000784	DLAC_01769	KYR01759	dl	0.95	26.62	111.05	0h	shared paralog	3.50862e-05
OG0000789	DFA_07243	EGG20123	df	0.8	14.53	40.68	0h	shared paralog	1
OG0000792	PPL_10988	EFA75484	pp	0.95	12.53	52.14	0h	shared paralog	1
OG0000802	DICPUDRAFT_25072	EGC40476	dp	0.99	5.65	27.37	24h	shared paralog	0.0469955
OG0000814	DLAC_10238	KYQ89017	dl	0.89	4.92	17.13	0h	shared paralog	0.124306
OG0000817	PPL_05449	EFA81461	pp	0.96	1.82	7.75	0h	shared paralog	1
OG0000818	DFA_00414	EGG20553	df	0.81	86.65	248.25	20h	shared paralog	0.000298467
OG0000818	DFA_07861	EGG16881	df	0.85	7.71	24.28	24h	shared paralog	NA
OG0000821	DICPUDRAFT_156391	EGC31725	dp	0.95	17.93	74.98	8h	shared paralog	0.0527875
OG0000825	DFA_05796	EGG23662	df	0.8	19.15	53.21	0h	shared paralog	1
OG0000826	PPL_04741	EFA82316	pp	0.89	112.46	391.07	8h	shared paralog	1
OG0000852	DFA_02340	EGG19094	df	0.89	51.38	177.18	0h	shared paralog	0.000728316
OG0000852	DLAC_06481	KYQ92495	dl	0.88	8.53	28.58	0h	shared paralog	0.0125211
OG0000852	DLAC_09250	KYQ90621	dl	0.9	62.3	224.97	0h	shared paralog	NA
OG0000858	DDB_G0284527	EAL65190	dd	0.95	8.76	36.69	8h	shared paralog	1
OG0000867	DLAC_09309	KYQ90673	dl	0.89	70.9	248.23	0h	shared paralog	0.253276
OG0000891	DLAC_05923	KYQ93267	dl	0.91	13.75	50.04	0h	shared paralog	0
OG0000906	DICPUDRAFT_9150	EGC36472	dp	0.98	11.45	53.3	0h	shared paralog	1
OG0000909	DICPUDRAFT_154651	EGC33313	dp	0.95	3.96	16.31	0h	shared paralog	1
OG0000912	DDB_G0274499	EDR41099	dd	0.92	6.8	26.11	0h	shared paralog	0.0286901
OG0000944	DFA_08414	EGG17419	df	0.81	310.88	877.78	12h	shared paralog	0.000654739
OG0000988	DICPUDRAFT_18468	EGC35485	dp	0.97	203.53	912.03	24h	shared paralog	0.0148567
OG0000997	DICPUDRAFT_77386	EGC36953	dp	0.95	11.55	47.93	24h	shared paralog	1
OG0000997	DICPUDRAFT_80593	EGC33661	dp	0.99	13.54	64.53	24h	shared paralog	NA
OG0000998	DICPUDRAFT_74877	EGC39551	dp	0.98	4.42	20.66	0h	shared paralog	0
OG0001002	DLAC_00474	KYR02988	dl	0.9	4.5	15.91	20h	shared paralog	0.0283946
OG0001020	DICPUDRAFT_80543	EGC33692	dp	0.94	2.73	11.05	12h	shared paralog	7.89701e-05
OG0001028	PPL_08085	EFA78630	pp	0.95	16.48	68.33	0h	shared paralog	0.0180208
OG0001030	DDB_G0293060	EAL60882	dd	0.99	162.7	786.58	24h	shared paralog	0.0136787
OG0001046	PPL_09957	EFA76652	pp	0.91	90.91	334.15	24h	shared paralog	5.90806e-05
OG0001047	DICPUDRAFT_154840	EGC33146	dp	0.95	46.14	189.59	24h	shared paralog	1
OG0001070	DFA_06615	EGG24465	df	0.84	6.27	19.19	24h	shared paralog	2.85614e-05
OG0001078	DFA_09921	EGG15097	df	0.92	3.62	13.59	24h	shared paralog	0.0823138
OG0001083	DICPUDRAFT_82327	EGC31804	dp	0.99	1.35	6.56	24h	shared paralog	0.384784
OG0001090	PPL_05719	EFA81725	pp	0.92	5.26	19.91	0h	shared paralog	0
OG0001096	DFA_08423	EGG17428	df	0.89	39.5	137.41	0h	shared paralog	0.00416221
OG0001098	DICPUDRAFT_92877	EGC31000	dp	0.99	13.53	64.69	0h	shared paralog	0.0562942
OG0001104	DFA_07154	EGG20038	df	0.82	15.52	45.2	8h	shared paralog	1
OG0001144	DDB_G0273273	EAL70854	dd	0.93	442.48	1707.53	24h	shared paralog	1
OG0001146	DDB_G0273105	EAL70770	dd	0.95	31.59	133.86	0h	shared paralog	1
OG0001179	DDB_G0273149	EAL70792	dd	0.92	83.67	315.38	12h	shared paralog	1
OG0001198	DFA_05721	EGG23587	df	0.87	8.07	26.4	24h	shared paralog	1
OG0001199	DDB_G0280707	EAL67155	dd	0.94	7.05	28.86	8h	shared paralog	1
OG0001206	DICPUDRAFT_74209	EGC40268	dp	0.94	2.25	9.05	0h	shared paralog	0
OG0001218	DICPUDRAFT_92482	EGC33066	dp	0.96	57.74	248.05	0h	shared paralog	0.00590589
OG0001224	DFA_04704	EGG22574	df	0.96	41.72	181.39	24h	shared paralog	7.4e-05
OG0001239	DFA_09536	EGG15867	df	0.85	1880.49	5940.37	0h	shared paralog	0.0127175
OG0001239	DFA_09595	EGG15924	df	0.79	3147.93	8615.96	0h	shared paralog	NA
OG0001263	DICPUDRAFT_83593	EGC30492	dp	0.95	11.66	48.81	24h	shared paralog	1
OG0001263	DICPUDRAFT_95122	EGC33109	dp	0.98	50.59	238.12	24h	shared paralog	NA
OG0001274	PPL_05121	EFA81889	pp	0.94	5.84	23.55	0h	shared paralog	0
OG0001285	DDB_G0278515	EAL68430	dd	0.93	0.41	1.59	20h	shared paralog	1
OG0001302	DICPUDRAFT_80876	EGC33341	dp	0.97	12.68	56.92	0h	shared paralog	0.30495
OG0001328	DICPUDRAFT_92180	EGC34624	dp	0.96	10.88	47.03	24h	shared paralog	1
OG0001343	DFA_05311	EGG23179	df	0.83	31.11	93.48	24h	shared paralog	1
OG0001352	DLAC_03364	KYR00207	dl	0.92	487.24	1854.98	0h	shared paralog	0.785106
OG0001405	PPL_05657	EFA81663	pp	0.9	28.94	103.1	0h	shared paralog	0.0136574
OG0001416	DLAC_01433	KYR01452	dl	0.96	10.56	44.89	24h	shared paralog	1
OG0001417	DICPUDRAFT_24773	EGC28407	dp	0.94	1.49	5.98	0h	shared paralog	0.413931
OG0001420	DFA_00142	EGG19564	df	0.83	23.35	69.86	24h	shared paralog	0.00257197
OG0001427	DFA_07596	EGG16618	df	0.93	1.02	3.97	24h	shared paralog	1
OG0001432	PPL_12388	EFA77180	pp	0.94	5.34	21.6	0h	shared paralog	0.000518
OG0001530	PPL_11813	EFA74780	pp	0.9	2.68	9.69	0h	shared paralog	0.0999034
OG0001860	DICPUDRAFT_30205	EGC37497	dp	0.99	12.03	58.32	24h	shared paralog	1
OG0001920	PPL_09988	EFA76227	pp	0.98	140.06	643.01	0h	shared paralog	1
OG0002056	PPL_11891	EFA74857	pp	0.92	32.31	120.66	0h	shared paralog	NA
OG0002056	PPL_12394	EFA77186	pp	0.95	64.81	272.45	0h	shared paralog	0.329764
OG0002075	DDB_G0290633	EAL62177	dd	0.92	26.6	101.66	8h	shared paralog	1
OG0002176	DDB_G0291189	EAL61878	dd	0.96	9.75	42.27	24h	shared paralog	NA
OG0002176	DDB_G0292254	EAL61337	dd	0.99	21.85	104.9	24h	shared paralog	1
OG0002220	DICPUDRAFT_79612	EGC34649	dp	1	29.92	149.6	20h	shared paralog	1
OG0003029	DDB_G0282143	EAL66351	dd	0.94	2026.36	8069.94	0h	shared paralog	0.134238
OG0003416	DFA_08801	EGG17801	df	0.87	36.04	117.52	0h	shared paralog	0.00396745
OG0003649	DDB_G0273331	EAL70883	dd	0.97	3.25	14.29	20h	shared paralog	1
OG0004143	DICPUDRAFT_151049	EGC36477	dp	0.97	0.69	3.11	24h	shared paralog	1
OG0004948	DDB_G0281253	EAL66923	dd	0.94	0.97	3.88	8h	shared paralog	1
OG0006013	DDB_G0287091	EAL63910	dd	0.9	42.17	150.74	24h	shared paralog	1
OG0006027	DICPUDRAFT_151989	EGC35651	dp	0.96	11.74	50.71	0h	shared paralog	1
OG0006028	PPL_08312	EFA78847	pp	0.96	18.93	80.86	8h	shared paralog	0.0104729
OG0006036	PPL_07364	EFA79673	pp	0.99	1319.69	6317.07	0h	shared paralog	4.07e-05
OG0006046	DFA_08911	EGG17910	df	0.91	13.43	48.88	24h	shared paralog	0.00477689
OG0006052	DFA_03988	EGG18494	df	0.95	37.33	156.81	0h	shared paralog	0.0763232
OG0006052	PPL_02046	EFA85050	pp	0.89	5.49	18.87	24h	shared paralog	0.000934891
OG0006056	PPL_01388	EFA85605	pp	0.97	30.2	135.59	0h	shared paralog	1
OG0006067	PPL_00854	EFA85625	pp	0.94	18.89	76.24	0h	shared paralog	0
OG0006271	DDB_G0269082	EAL73130	dd	0.92	3.23	12.26	24h	shared paralog	1
OG0006271	DICPUDRAFT_92241	EGC34330	dp	1	337.57	1664.21	24h	shared paralog	1
OG0006450	DDB_G0293442	EAL60723	dd	0.94	274.55	1116.17	24h	shared paralog	1
OG0006470	DICPUDRAFT_76803	EGC37604	dp	1	0.7	3.52	24h	shared paralog	0
OG0006584	DDB_G0275083	EAL69822	dd	0.96	105.74	458.2	24h	shared paralog	0.0294778
OG0006607	DDB_G0275523	EAL69512	dd	0.95	5.99	24.85	0h	shared paralog	0.0534301
OG0006707	DDB_G0278565	EAL68455	dd	0.9	22.53	81.48	20h	shared paralog	1
OG0007034	DICPUDRAFT_154723	EGC33235	dp	1	0.79	3.95	0h	shared paralog	0.0175357
OG0007046	DFA_03377	EGG25130	df	0.88	139.85	467.76	24h	shared paralog	0.153631
OG0007056	DLAC_01517	KYR01525	dl	0.9	19.15	67.52	20h	shared paralog	0.0700929
OG0007057	DLAC_07758	KYQ90887	dl	0.9	3.24	11.52	0h	shared paralog	NA
OG0007057	DLAC_11238	KYQ88516	dl	0.88	3.95	13.49	0h	shared paralog	0.34205
OG0007068	DFA_05069	EGG22939	df	0.83	2.01	5.95	24h	shared paralog	0.000386901
OG0007071	DLAC_10383	KYQ89143	dl	0.92	12.32	47.35	0h	shared paralog	0.0527875
OG0007078	DFA_01142	EGG21263	df	0.91	87.26	322.98	20h	shared paralog	0.316473
OG0007079	DFA_07950	EGG16969	df	0.87	18.85	61.8	24h	shared paralog	0.00446158
OG0007088	PPL_11069	EFA75564	pp	0.89	1.49	5.14	0h	shared paralog	0.0618459
OG0007134	DLAC_10118	KYQ89450	dl	0.91	3.72	13.66	24h	shared paralog	1
OG0007194	DICPUDRAFT_157090	EGC31104	dp	0.95	10.61	43.95	0h	shared paralog	0.0757333
OG0007203	DDB_G0267580	EAL73243	dd	0.99	9.91	46.79	24h	shared paralog	1
OG0007216	DDB_G0267474	EAL73190	dd	0.9	237.74	838.14	24h	shared paralog	1
OG0007301	DDB_G0272570	EAL70922	dd	0.9	15.41	54.86	24h	shared paralog	1
OG0007340	DICPUDRAFT_99692	EGC29905	dp	0.97	27.92	125.92	8h	shared paralog	1
OG0007368	DICPUDRAFT_25174	EGC40461	dp	0.94	57.25	228.86	8h	shared paralog	0.0238923
OG0007408	DICPUDRAFT_153667	EGC34152	dp	0.97	1.75	7.92	0h	shared paralog	0.125668
OG0007450	DICPUDRAFT_151317	EGC36236	dp	0.96	14.89	64.69	0h	shared paralog	NA
OG0007450	DICPUDRAFT_83889	EGC30140	dp	0.97	6.25	27.65	0h	shared paralog	1
OG0007515	PPL_02011	EFA85016	pp	0.93	33.1	128.55	0h	shared paralog	0.24724
OG0007559	DICPUDRAFT_155071	EGC32933	dp	1	0.23	1.15	20h	shared paralog	0.0036337
OG0007597	DLAC_09291	KYQ90657	dl	0.94	736.07	2992.82	0h	shared paralog	0.37399
OG0007606	PPL_00561	EFA86756	pp	0.96	124.42	537.97	0h	shared paralog	0
OG0007614	PPL_08932	EFA78281	pp	0.92	22.75	86.6	0h	shared paralog	1
OG0007666	DLAC_04939	KYQ93568	dl	0.9	4.6	16.4	0h	shared paralog	1
OG0007676	PPL_11218	EFA75144	pp	0.94	18.43	74.09	0h	shared paralog	2.22e-05
OG0000006	DICPUDRAFT_32656	EGC35897	dp	0.94	3.43	13.76	8h	shared singleton
OG0000129	DFA_09707	EGG16035	df	0.85	11.84	36.77	24h	shared singleton
OG0000168	DICPUDRAFT_93131	EGC29526	dp	1	160.5	795.05	24h	shared singleton
OG0000171	DICPUDRAFT_75792	EGC38630	dp	0.96	12.73	54.25	8h	shared singleton
OG0000199	PPL_10634	EFA76055	pp	0.99	264.34	1261.8	0h	shared singleton
OG0000207	DFA_01153	EGG21273	df	0.8	20.35	56.89	12h	shared singleton
OG0000212	DLAC_01180	KYR02350	dl	0.98	1146.54	5307.12	24h	shared singleton
OG0000226	DLAC_11514	KYR01004	dl	0.89	57.08	197.02	20h	shared singleton
OG0000236	DFA_08531	EGG17535	df	0.81	6.66	18.91	24h	shared singleton
OG0000239	DLAC_03494	KYQ99998	dl	0.95	123.51	521.12	0h	shared singleton
OG0000263	DICPUDRAFT_21341	EGC35486	dp	0.97	12.32	55.61	0h	shared singleton
OG0000288	DLAC_01409	KYR01905	dl	0.89	20.01	69.63	0h	shared singleton
OG0000310	DICPUDRAFT_76336	EGC38078	dp	0.96	11.57	50.45	0h	shared singleton
OG0000312	DICPUDRAFT_98603	EGC33292	dp	0.95	1483.62	6161.81	0h	shared singleton
OG0000312	DLAC_10026	KYQ89363	dl	0.92	948.16	3590.32	0h	shared singleton
OG0000318	DFA_07262	EGG20142	df	0.89	83.2	286.88	8h	shared singleton
OG0000318	PPL_10145	EFA76380	pp	0.94	4274.05	17191.5	8h	shared singleton
OG0000321	DDB_G0279257	EAL67777	dd	0.91	0.37	1.38	8h	shared singleton
OG0000326	DFA_04901	EGG22771	df	0.86	52.3	166.68	24h	shared singleton
OG0000367	DICPUDRAFT_37897	EGC32728	dp	1	0.92	4.62	24h	shared singleton
OG0000370	DFA_05365	EGG23233	df	0.89	35.5	123.91	24h	shared singleton
OG0000386	DLAC_11352	KYQ88611	dl	0.9	66.04	236.01	0h	shared singleton
OG0000393	DICPUDRAFT_151873	EGC35741	dp	0.95	128.3	537.43	0h	shared singleton
OG0000416	DFA_03059	EGG24814	df	0.85	34.43	107.58	0h	shared singleton
OG0000421	PPL_04587	EFA82167	pp	0.93	17.22	67.33	0h	shared singleton
OG0000469	PPL_04711	EFA82287	pp	0.97	335.84	1490.09	0h	shared singleton
OG0000470	DLAC_06393	KYQ92414	dl	0.9	122.63	443.12	0h	shared singleton
OG0000475	PPL_03117	EFA84044	pp	0.91	23.9	87.23	24h	shared singleton
OG0000492	DFA_03083	EGG24838	df	0.89	93.53	325.63	0h	shared singleton
OG0000492	DLAC_02476	KYR00473	dl	0.98	30.42	142.73	0h	shared singleton
OG0000500	PPL_02174	EFA85174	pp	0.96	8.09	35.11	0h	shared singleton
OG0000503	DLAC_05368	KYQ92788	dl	0.89	16.78	57.79	0h	shared singleton
OG0000516	DFA_07366	EGG20243	df	0.85	3.33	10.52	0h	shared singleton
OG0000535	PPL_06383	EFA80797	pp	0.96	61.33	266.58	0h	shared singleton
OG0000550	DICPUDRAFT_157783	EGC30491	dp	0.95	61.53	255.43	0h	shared singleton
OG0000591	DLAC_01233	KYR02394	dl	0.89	167.95	575.63	24h	shared singleton
OG0000595	PPL_02430	EFA85425	pp	0.99	1133.77	5425.86	0h	shared singleton
OG0000605	DICPUDRAFT_30982	EGC36988	dp	0.97	8.48	38.12	24h	shared singleton
OG0000608	DDB_G0293366	EAL60750	dd	0.91	78.29	284.47	0h	shared singleton
OG0000608	DLAC_01431	KYR01450	dl	0.9	4.8	17.07	0h	shared singleton
OG0000608	PPL_10113	EFA76348	pp	0.9	8.2	29.27	0h	shared singleton
OG0000612	DLAC_10965	KYQ88274	dl	0.94	13.55	54.11	24h	shared singleton
OG0000616	DDB_G0272308	EAL71306	dd	0.91	2110.49	7761.27	0h	shared singleton
OG0000619	DFA_00585	EGG20722	df	0.89	106.65	365.8	0h	shared singleton
OG0000619	PPL_05590	EFA81599	pp	0.91	138.83	507.22	0h	shared singleton
OG0000620	DDB_G0274337	EAL70061	dd	1	147.24	725.54	24h	shared singleton
OG0000620	DICPUDRAFT_91100	EGC40039	dp	0.98	125.66	574.01	24h	shared singleton
OG0000641	PPL_05226	EFA81991	pp	0.94	19.17	76.31	8h	shared singleton
OG0000661	DLAC_01491	KYR01504	dl	0.91	340.74	1247.6	0h	shared singleton
OG0000663	PPL_07598	EFA79547	pp	0.91	7.29	26.91	0h	shared singleton
OG0000695	PPL_01588	EFA84598	pp	0.98	98.54	460.37	0h	shared singleton
OG0000709	DDB_G0289599	EAL62617	dd	0.91	266.97	980.68	0h	shared singleton
OG0000718	DFA_07679	EGG16701	df	0.81	126.98	360.83	8h	shared singleton
OG0000752	DFA_10979	EGG14719	df	0.82	105.65	304.42	12h	shared singleton
OG0000753	PPL_05483	EFA81495	pp	0.95	11.66	48.48	0h	shared singleton
OG0000757	DLAC_04879	KYQ93985	dl	0.88	4.22	14.1	20h	shared singleton
OG0000763	PPL_07586	EFA79535	pp	0.9	216.71	782.02	20h	shared singleton
OG0000765	DLAC_11658	KYQ92566	dl	0.96	21.62	94.48	0h	shared singleton
OG0000766	DLAC_10430	KYQ89186	dl	0.9	64.92	230.97	0h	shared singleton
OG0000768	DDB_G0292054	EAL61383	dd	0.92	909.44	3456.94	24h	shared singleton
OG0000768	DICPUDRAFT_91957	EGC35782	dp	1	768.51	3819.02	24h	shared singleton
OG0000773	DLAC_11077	KYQ88379	dl	0.95	124.23	519.37	0h	shared singleton
OG0000773	PPL_02250	EFA85250	pp	0.97	43.56	196.24	0h	shared singleton
OG0000781	DFA_04806	EGG22676	df	0.92	5.64	21.57	0h	shared singleton
OG0000816	DDB_G0276143	EAL69371	dd	0.92	5.05	19.13	24h	shared singleton
OG0000835	DFA_07822	EGG16843	df	0.85	41.37	128.34	0h	shared singleton
OG0000858	PPL_02150	EFA85151	pp	0.95	45.56	189.64	0h	shared singleton
OG0000867	DDB_G0285591	EAL64633	dd	0.91	10.25	37.21	0h	shared singleton
OG0000887	DFA_04900	EGG22770	df	0.88	84.24	285.44	24h	shared singleton
OG0000902	DFA_02284	EGG19041	df	0.97	179.61	796.09	0h	shared singleton
OG0000907	DDB_G0287717	EAL63505	dd	0.9	119.3	431.25	0h	shared singleton
OG0000916	DLAC_03767	KYQ99817	dl	0.92	507.95	1947.6	0h	shared singleton
OG0000926	PPL_10314	EFA76546	pp	0.89	122.23	425.97	0h	shared singleton
OG0000933	DLAC_07399	KYQ91627	dl	0.94	12.87	51.87	0h	shared singleton
OG0000940	PPL_04915	EFA82490	pp	0.9	347.74	1234.53	0h	shared singleton
OG0000955	DDB_G0290333	EAL62293	dd	0.91	332.7	1209.16	0h	shared singleton
OG0000955	DFA_01300	EGG21416	df	0.83	1608.27	4793.04	0h	shared singleton
OG0000955	PPL_03772	EFA82993	pp	0.96	509	2200.24	0h	shared singleton
OG0000957	DFA_11590	EGG13829	df	0.89	55.89	192.87	12h	shared singleton
OG0000963	PPL_08988	EFA78337	pp	0.91	15.6	56.54	0h	shared singleton
OG0000970	DICPUDRAFT_51890	EGC28364	dp	0.97	18.8	84.77	24h	shared singleton
OG0000997	DDB_G0268006	EAL73456	dd	0.95	28.89	119.35	24h	shared singleton
OG0001010	PPL_07979	EFA79154	pp	0.99	45.33	214.87	0h	shared singleton
OG0001019	PPL_09991	EFA76230	pp	0.92	33.39	127.43	0h	shared singleton
OG0001025	DFA_01561	EGG21675	df	0.88	52.54	175.69	0h	shared singleton
OG0001026	PPL_08079	EFA78624	pp	0.9	40.32	143.21	0h	shared singleton
OG0001030	DICPUDRAFT_91845	EGC36397	dp	0.95	595.51	2491.69	24h	shared singleton
OG0001042	DDB_G0270406	EAL72553	dd	0.99	9.66	45.77	24h	shared singleton
OG0001046	DICPUDRAFT_92467	EGC33138	dp	0.99	1726.62	8287.43	24h	shared singleton
OG0001046	DFA_03552	EGG25303	df	0.98	72.57	332.22	24h	shared singleton
OG0001047	DLAC_02417	KYR00976	dl	0.92	34.58	132.33	24h	shared singleton
OG0001048	DDB_G0291434	EAL61701	dd	0.9	318.36	1130.15	8h	shared singleton
OG0001059	PPL_02810	EFA83743	pp	1	20.85	103.54	24h	shared singleton
OG0001061	DFA_08183	EGG17196	df	0.82	42.31	121.78	12h	shared singleton
OG0001068	DDB_G0292696	EAL61151	dd	0.91	191.69	695.96	8h	shared singleton
OG0001068	DFA_00209	EGG19631	df	0.83	507.99	1528.14	8h	shared singleton
OG0001069	PPL_10074	EFA76311	pp	0.98	42.5	193.22	0h	shared singleton
OG0001072	DFA_02039	EGG19253	df	0.83	48.03	142.58	12h	shared singleton
OG0001101	DDB_G0271908	EAL71478	dd	0.9	109.62	395.63	8h	shared singleton
OG0001102	PPL_07397	EFA79706	pp	0.95	26.14	108.65	0h	shared singleton
OG0001105	DFA_06302	EGG24156	df	0.83	144.82	428.95	0h	shared singleton
OG0001105	PPL_05060	EFA81828	pp	0.9	8.34	29.86	0h	shared singleton
OG0001118	DLAC_03371	KYR00215	dl	0.88	109.79	367.16	0h	shared singleton
OG0001120	DFA_02044	EGG19258	df	0.81	86.55	246.12	12h	shared singleton
OG0001127	PPL_01665	EFA84674	pp	0.94	18.88	77.13	0h	shared singleton
OG0001144	DICPUDRAFT_44134	EGC28541	dp	1	166.15	822.63	24h	shared singleton
OG0001144	DFA_08255	EGG17264	df	0.95	0.33	1.38	24h	shared singleton
OG0001146	DFA_00047	EGG19470	df	0.93	186.94	741.48	0h	shared singleton
OG0001168	PPL_00746	EFA86184	pp	0.92	31.26	119.38	0h	shared singleton
OG0001196	DLAC_09396	KYQ90758	dl	0.89	31.53	110.42	0h	shared singleton
OG0001197	DLAC_09395	KYQ90757	dl	0.89	41.54	144.66	0h	shared singleton
OG0001203	DDB_G0274273	EAL70029	dd	0.91	40.59	148.59	0h	shared singleton
OG0001206	PPL_09087	EFA78435	pp	0.95	11.77	48.37	0h	shared singleton
OG0001214	PPL_00065	EFA74565	pp	0.93	641.49	2500.35	0h	shared singleton
OG0001221	DFA_12319	EGG14543	df	0.91	68.74	253.57	0h	shared singleton
OG0001225	DLAC_00180	KYR02716	dl	0.88	222.85	753.22	0h	shared singleton
OG0001229	PPL_07741	EFA79323	pp	0.93	20.99	82.16	0h	shared singleton
OG0001237	DICPUDRAFT_43625	EGC28911	dp	0.94	131.68	535.26	24h	shared singleton
OG0001239	DDB_G0275439	EAL69470	dd	0.92	265.8	1007.27	8h	shared singleton
OG0001240	DFA_11627	EGG13866	df	0.87	274.98	893.92	0h	shared singleton
OG0001240	DLAC_00402	KYR02922	dl	0.91	727.43	2673.26	0h	shared singleton
OG0001250	DDB_G0276899	EAL68951	dd	0.93	23.75	91.5	0h	shared singleton
OG0001263	DFA_05943	EGG23807	df	0.82	46.55	134.46	24h	shared singleton
OG0001263	PPL_02037	EFA85041	pp	0.94	9.59	38.67	24h	shared singleton
OG0001273	DDB_G0277883	EAL68114	dd	0.95	5.01	21.1	24h	shared singleton
OG0001283	PPL_04216	EFA82528	pp	0.96	67.92	292.23	0h	shared singleton
OG0001296	PPL_03165	EFA84092	pp	0.96	203.05	876.95	0h	shared singleton
OG0001302	DLAC_01732	KYR01722	dl	0.88	22.34	75.59	0h	shared singleton
OG0001310	DFA_07506	EGG20382	df	0.8	147.11	405.05	0h	shared singleton
OG0001311	DFA_03641	EGG25392	df	0.79	33.66	90.88	8h	shared singleton
OG0001325	PPL_01080	EFA85848	pp	0.96	26.69	114.66	24h	shared singleton
OG0001332	PPL_10351	EFA76582	pp	0.89	16.18	56.89	0h	shared singleton
OG0001347	DFA_04763	EGG22633	df	0.89	6.64	23.15	24h	shared singleton
OG0001352	DDB_G0283393	EAL65681	dd	0.97	1803.94	8099.41	0h	shared singleton
OG0001363	DFA_11557	EGG13796	df	0.82	22.82	65.79	8h	shared singleton
OG0001369	DFA_10927	EGG14669	df	0.78	293.41	787.64	0h	shared singleton
OG0001370	DLAC_08602	KYQ90024	dl	0.91	45.28	164.97	8h	shared singleton
OG0001385	PPL_06196	EFA80961	pp	0.91	176.66	657.88	8h	shared singleton
OG0001388	DLAC_07291	KYQ91530	dl	0.95	12.92	54.18	0h	shared singleton
OG0001392	DFA_06924	EGG19822	df	0.81	3112.92	8836.57	0h	shared singleton
OG0001392	PPL_07647	EFA79229	pp	0.96	2060.04	8824.65	0h	shared singleton
OG0001415	DDB_G0286953	EAL63974	dd	0.91	42.67	156.44	0h	shared singleton
OG0001415	DLAC_07777	KYQ90904	dl	0.96	58.86	251.81	0h	shared singleton
OG0001424	DFA_06495	EGG24345	df	0.88	41.66	140.35	0h	shared singleton
OG0001464	DLAC_10908	KYQ88223	dl	0.87	43.91	145.9	0h	shared singleton
OG0001478	DFA_08790	EGG17790	df	0.84	71.06	214.9	12h	shared singleton
OG0001489	DDB_G0287417	EAL63776	dd	0.9	9.38	33.24	24h	shared singleton
OG0001489	DICPUDRAFT_148594	EGC38672	dp	0.99	20.63	98.27	24h	shared singleton
OG0001489	DFA_11388	EGG13627	df	0.96	3.84	16.84	24h	shared singleton
OG0001489	PPL_07572	EFA79521	pp	0.99	1.36	6.62	24h	shared singleton
OG0001517	DFA_09072	EGG16528	df	0.87	496.61	1616.03	8h	shared singleton
OG0001519	DLAC_04291	KYQ94018	dl	0.9	2.83	10.04	0h	shared singleton
OG0001529	DFA_03630	EGG25381	df	0.84	343.42	1036.85	12h	shared singleton
OG0001544	DFA_10502	EGG15660	df	0.86	4.21	13.54	8h	shared singleton
OG0001553	DLAC_08037	KYQ91129	dl	0.89	0.58	1.99	24h	shared singleton
OG0001571	DLAC_02404	KYR01281	dl	0.93	2.28	8.98	0h	shared singleton
OG0001582	DICPUDRAFT_80912	EGC33315	dp	0.97	25.59	113.05	0h	shared singleton
OG0001582	DLAC_09159	KYQ90534	dl	0.87	35.84	118.82	0h	shared singleton
OG0001583	DICPUDRAFT_36934	EGC33301	dp	0.96	15.02	64.49	0h	shared singleton
OG0001583	DLAC_09158	KYQ90533	dl	0.96	30.14	130.12	0h	shared singleton
OG0001593	PPL_06742	EFA79922	pp	0.95	19.7	81.56	0h	shared singleton
OG0001606	PPL_06444	EFA80855	pp	0.89	6.65	23.22	0h	shared singleton
OG0001609	PPL_01181	EFA85948	pp	0.89	13.58	47.27	8h	shared singleton
OG0001672	DFA_06948	EGG19846	df	0.83	105.15	313.27	0h	shared singleton
OG0001674	DLAC_03327	KYR00173	dl	0.88	464.85	1582.87	0h	shared singleton
OG0001675	PPL_10012	EFA76251	pp	0.9	34.68	125.41	0h	shared singleton
OG0001676	DICPUDRAFT_76106	EGC38293	dp	0.99	30.82	145.87	24h	shared singleton
OG0001676	DFA_05252	EGG23122	df	0.81	8.03	23.06	12h	shared singleton
OG0001676	DLAC_07957	KYQ91055	dl	0.92	17.31	65.39	24h	shared singleton
OG0001678	DDB_G0288359	EAL63276	dd	0.93	34.28	133.42	24h	shared singleton
OG0001679	DDB_G0288323	EAL63258	dd	0.98	275.46	1283.2	24h	shared singleton
OG0001679	DICPUDRAFT_55916	EGC34297	dp	1	489.67	2423.4	24h	shared singleton
OG0001679	DFA_11655	EGG13894	df	0.96	41.49	176.23	12h	shared singleton
OG0001683	DFA_09082	EGG16538	df	0.84	24.33	73.53	12h	shared singleton
OG0001686	DICPUDRAFT_84956	EGC28991	dp	0.94	1846.71	7529.64	0h	shared singleton
OG0001686	DLAC_01835	KYR01822	dl	0.92	688.64	2576.49	0h	shared singleton
OG0001715	DDB_G0288489	EAL63193	dd	1	132.43	654.59	24h	shared singleton
OG0001715	DICPUDRAFT_97608	EGC36331	dp	0.99	61.85	302.19	24h	shared singleton
OG0001723	DICPUDRAFT_158929	EGC29488	dp	0.96	182	783.66	8h	shared singleton
OG0001727	DFA_11456	EGG13695	df	0.86	3.21	10.38	24h	shared singleton
OG0001755	DLAC_06103	KYQ93415	dl	0.91	3.65	13.53	0h	shared singleton
OG0001781	DFA_05404	EGG23272	df	0.87	26.82	87.86	0h	shared singleton
OG0001787	DICPUDRAFT_27582	EGC39083	dp	0.97	7.54	33.27	0h	shared singleton
OG0001790	DICPUDRAFT_157031	EGC31144	dp	0.95	3.21	13.33	0h	shared singleton
OG0001790	PPL_12234	EFA77627	pp	0.93	0.98	3.84	0h	shared singleton
OG0001793	DDB_G0288817	EAL63030	dd	0.95	37.3	155.54	24h	shared singleton
OG0001793	DICPUDRAFT_157492	EGC30730	dp	1	68.23	335.22	24h	shared singleton
OG0001811	DLAC_03562	KYQ99972	dl	0.9	21.93	77.98	0h	shared singleton
OG0001813	DFA_09943	EGG15119	df	0.88	62.12	208.43	0h	shared singleton
OG0001813	DLAC_03561	KYQ99971	dl	0.93	164.83	653.86	0h	shared singleton
OG0001813	PPL_04573	EFA82153	pp	0.91	20.85	77.65	0h	shared singleton
OG0001821	DDB_G0288935	EAL62991	dd	0.97	39.82	178.46	0h	shared singleton
OG0001824	DFA_04675	EGG22545	df	0.99	9.41	44.47	24h	shared singleton
OG0001824	PPL_05996	EFA81159	pp	0.96	7.71	32.76	24h	shared singleton
OG0001826	DLAC_03778	KYQ99826	dl	0.9	48.86	173.06	0h	shared singleton
OG0001827	DFA_10269	EGG15434	df	0.79	29.14	78.63	12h	shared singleton
OG0001838	DFA_01826	EGG21940	df	0.94	24.16	96.71	24h	shared singleton
OG0001838	DLAC_07675	KYQ91865	dl	0.91	43.4	159.64	0h	shared singleton
OG0001841	DLAC_07498	KYQ91716	dl	0.92	1199.94	4502.04	0h	shared singleton
OG0001841	PPL_05007	EFA82102	pp	0.92	779.22	2943.5	0h	shared singleton
OG0001842	PPL_11300	EFA75225	pp	0.95	35.19	144.75	0h	shared singleton
OG0001852	DICPUDRAFT_153934	EGC33958	dp	1	1092.14	5406.02	24h	shared singleton
OG0001852	DFA_02558	EGG18819	df	0.99	26.77	126.38	24h	shared singleton
OG0001852	DLAC_03531	KYR00033	dl	0.88	82.87	279.13	20h	shared singleton
OG0001862	DLAC_09646	KYQ89679	dl	0.88	311.09	1050.31	0h	shared singleton
OG0001892	PPL_11301	EFA75226	pp	0.91	95.43	347.92	0h	shared singleton
OG0001893	PPL_03272	EFA84196	pp	0.92	23.01	88.1	0h	shared singleton
OG0001907	DFA_02267	EGG19024	df	0.79	97.08	261.09	0h	shared singleton
OG0001920	DDB_G0289527	EAL62695	dd	0.97	112.92	510.46	24h	shared singleton
OG0001920	DFA_10661	EGG14788	df	0.82	10.88	31.54	0h	shared singleton
OG0001932	DICPUDRAFT_155823	EGC32237	dp	0.95	75.52	316.07	0h	shared singleton
OG0001956	DFA_09520	EGG15851	df	0.82	18.18	52.64	20h	shared singleton
OG0001960	PPL_01655	EFA84665	pp	1	194.27	955.21	0h	shared singleton
OG0001985	DFA_02451	EGG19203	df	0.83	406.65	1216.12	12h	shared singleton
OG0001990	DLAC_00010	KYR02571	dl	0.93	827.75	3212.4	0h	shared singleton
OG0001997	DDB_G0290023	EAL62417	dd	0.94	12.86	52.4	24h	shared singleton
OG0002006	DFA_05685	EGG23552	df	0.86	83.26	266.19	12h	shared singleton
OG0002006	PPL_02303	EFA85302	pp	0.98	45.01	206.58	24h	shared singleton
OG0002009	PPL_04282	EFA82591	pp	0.94	20.86	84.97	0h	shared singleton
OG0002017	DICPUDRAFT_81609	EGC32575	dp	0.94	1957.21	7948.03	0h	shared singleton
OG0002017	DLAC_10058	KYQ89397	dl	0.91	1056.5	3900.57	0h	shared singleton
OG0002019	DICPUDRAFT_155439	EGC32574	dp	0.96	13.16	57.68	0h	shared singleton
OG0002028	DICPUDRAFT_78261	EGC36034	dp	0.94	11.65	47.13	0h	shared singleton
OG0002053	DICPUDRAFT_54064	EGC37316	dp	0.96	1683.66	7266.9	0h	shared singleton
OG0002053	DLAC_04521	KYQ94227	dl	0.92	844.08	3237.29	0h	shared singleton
OG0002064	DICPUDRAFT_53966	EGC37434	dp	0.96	17.94	78.05	0h	shared singleton
OG0002075	DICPUDRAFT_91418	EGC38500	dp	0.96	376.52	1603.75	12h	shared singleton
OG0002098	DLAC_07546	KYQ91758	dl	0.89	15.61	54.8	0h	shared singleton
OG0002098	PPL_04430	EFA82735	pp	0.91	6.76	24.69	0h	shared singleton
OG0002104	DDB_G0290745	EAS66827	dd	0.91	14.44	52.68	0h	shared singleton
OG0002104	DFA_03256	EGG25010	df	0.84	89.93	273.89	8h	shared singleton
OG0002104	PPL_08911	EFA78260	pp	0.93	28.09	109.71	8h	shared singleton
OG0002119	DFA_03009	EGG24765	df	0.81	127.53	358.96	12h	shared singleton
OG0002122	DICPUDRAFT_152406	EGC35279	dp	1	74.49	365.53	24h	shared singleton
OG0002136	DFA_01372	EGG21486	df	0.81	13.85	38.98	8h	shared singleton
OG0002150	DLAC_09723	KYQ89754	dl	0.89	55.16	191.02	0h	shared singleton
OG0002152	DICPUDRAFT_41313	EGC30572	dp	0.96	26.4	111.96	0h	shared singleton
OG0002173	PPL_12306	EFA77697	pp	0.96	369.06	1600.8	0h	shared singleton
OG0002176	DICPUDRAFT_22402	EGC33188	dp	0.99	17.24	81.37	24h	shared singleton
OG0002180	DICPUDRAFT_51206	EGC29533	dp	0.94	342.36	1395.79	0h	shared singleton
OG0002201	DICPUDRAFT_43402	EGC29052	dp	0.97	126.12	565.81	0h	shared singleton
OG0002201	DLAC_07073	KYQ92226	dl	0.88	114.48	386.32	0h	shared singleton
OG0002221	DICPUDRAFT_79139	EGC35148	dp	0.98	11.2	52.71	0h	shared singleton
OG0002224	DFA_04489	EGG22371	df	0.91	37.91	137.67	12h	shared singleton
OG0002225	PPL_00750	EFA86188	pp	0.95	85.53	353.21	0h	shared singleton
OG0002230	DLAC_11501	KYR01349	dl	0.88	809.62	2705.07	0h	shared singleton
OG0002237	DFA_00663	EGG20798	df	0.79	79.63	215.36	12h	shared singleton
OG0002244	DFA_06214	EGG24076	df	0.82	37.8	109.27	24h	shared singleton
OG0002258	DDB_G0267734	EAL73320	dd	0.92	68.88	258.99	0h	shared singleton
OG0002258	DLAC_08909	KYQ90307	dl	0.91	132.1	484.3	0h	shared singleton
OG0002258	PPL_06491	EFA80552	pp	0.93	9.8	38.52	0h	shared singleton
OG0002261	DICPUDRAFT_29096	EGC38213	dp	0.95	36.86	154.7	0h	shared singleton
OG0002270	DFA_06478	EGG24328	df	0.79	16.94	46.22	24h	shared singleton
OG0002284	DICPUDRAFT_155952	EGC32115	dp	0.95	8.18	34.28	0h	shared singleton
OG0002295	DFA_08503	EGG17507	df	0.91	3.95	14.37	24h	shared singleton
OG0002307	PPL_09225	EFA78573	pp	0.92	21.52	81.5	0h	shared singleton
OG0002329	DFA_02014	EGG19229	df	0.88	54.13	183.63	24h	shared singleton
OG0002329	PPL_10693	EFA76114	pp	0.99	62.04	298.59	24h	shared singleton
OG0002344	PPL_10688	EFA76109	pp	0.98	32.08	147.14	24h	shared singleton
OG0002348	DFA_09676	EGG16004	df	0.92	72.24	274.38	8h	shared singleton
OG0002360	DICPUDRAFT_84097	EGC29926	dp	0.94	11.51	47.02	0h	shared singleton
OG0002382	DFA_04865	EGG22735	df	0.8	27.07	75.91	8h	shared singleton
OG0002401	DFA_01481	EGG21595	df	0.8	118.18	331.62	0h	shared singleton
OG0002401	PPL_03612	EFA83464	pp	0.89	19.92	68.58	0h	shared singleton
OG0002410	DFA_11799	EGG14036	df	0.79	20	54.29	12h	shared singleton
OG0002417	PPL_01166	EFA85933	pp	0.94	24.44	97.12	0h	shared singleton
OG0002433	DFA_07034	EGG19926	df	0.87	2.27	7.43	12h	shared singleton
OG0002433	PPL_09779	EFA77027	pp	0.94	3.03	12.34	0h	shared singleton
OG0002449	DLAC_00497	KYR03010	dl	0.9	107.91	384.61	0h	shared singleton
OG0002469	DLAC_11148	KYQ88443	dl	0.89	6.32	22.06	0h	shared singleton
OG0002478	DICPUDRAFT_152862	EGC34862	dp	0.94	7.09	29.04	0h	shared singleton
OG0002478	DLAC_09968	KYQ89309	dl	0.94	15.33	62.22	0h	shared singleton
OG0002507	DICPUDRAFT_91317	EGC39021	dp	0.94	142.27	579.55	0h	shared singleton
OG0002521	DLAC_08707	KYQ90123	dl	0.92	30.11	114.38	0h	shared singleton
OG0002524	DICPUDRAFT_83574	EGC30497	dp	0.94	15.26	61.59	0h	shared singleton
OG0002561	DICPUDRAFT_38705	EGC32199	dp	0.94	23.25	93.68	0h	shared singleton
OG0002562	DDB_G0269112	EAL71905	dd	0.96	124.55	539.73	24h	shared singleton
OG0002568	DICPUDRAFT_89421	EGC31968	dp	0.95	13.14	54.49	0h	shared singleton
OG0002574	DDB_G0269658	EAL72179	dd	0.94	12.14	49.36	24h	shared singleton
OG0002619	DICPUDRAFT_74059	EGC40360	dp	0.96	19.83	85.52	0h	shared singleton
OG0002619	DLAC_08420	KYQ91453	dl	0.91	22.24	80.99	0h	shared singleton
OG0002628	DDB_G0270636	EAL72668	dd	0.97	9.09	41.01	24h	shared singleton
OG0002637	PPL_07316	EFA80481	pp	0.96	401.22	1703.19	0h	shared singleton
OG0002652	DLAC_04368	KYQ94088	dl	0.87	10.19	33.95	0h	shared singleton
[truncated: 645 more rows]

## Sheet: TableS6.GOenrichment
Table S6. Gene ontology terms that are enriched among gene categories in each species. Annotated represents the number of genes with the GO term in the genome of the focal species. Observed represents the number of genes in the gene category. Expected represents the estimated expected number of genes, and the Fold represents the fold change between observed and expected. The p-value and FDR are b…
GO.ID	Term	Species	Annotated	Observed	Expected	Fold	P-value	FDR	Category	Ontology
GO:0002181	cytoplasmic translation	dd	44	9	1.54	5.84416	1.6e-05	0.0290741	Biased	BP
GO:0005975	carbohydrate metabolic process	df	145	18	5.99	3.00501	1.1e-05	0.027556	Biased	BP
GO:0006412	translation	dd	249	32	8.7	3.67816	1.5e-08	5.4e-05	Biased	BP
GO:0006412	translation	dl	188	61	8.85	6.89266	< 1e-30	1.54e-35	Biased	BP
GO:0006412	translation	dp	264	40	9.35	4.27807	5.5e-17	2.06e-13	Biased	BP
GO:0007155	cell adhesion	pp	54	12	2.03	5.91133	1.7e-07	0.00044811	Biased	BP
GO:0055114	oxidation-reduction process	dl	319	33	15.02	2.19707	2.3e-06	0.00212719	Biased	BP
GO:0005576	extracellular region	dd	359	33	12.89	2.56012	1.7e-07	4.58e-05	Biased	CC
GO:0005840	ribosome	dl	110	67	5.69	11.775	< 1e-30	2.53e-53	Biased	CC
GO:0016021	integral component of membrane	df	2234	130	92.42	1.40662	3.6e-11	1.99e-08	Biased	CC
GO:0016021	integral component of membrane	pp	2028	115	88.17	1.3043	9.4e-06	0.00515955	Biased	CC
GO:0022625	cytosolic large ribosomal subunit	dd	47	16	1.69	9.46746	2.3e-12	1.85e-09	Biased	CC
GO:0022625	cytosolic large ribosomal subunit	dp	45	17	1.6	10.625	5.3e-14	4.47e-11	Biased	CC
GO:0022627	cytosolic small ribosomal subunit	dd	31	13	1.11	11.7117	1.3e-11	5.19e-09	Biased	CC
GO:0022627	cytosolic small ribosomal subunit	dp	34	12	1.21	9.91736	8e-10	3.35e-07	Biased	CC
GO:0031012	extracellular matrix	dp	33	7	1.17	5.98291	0.00012	0.0348337	Biased	CC
GO:0003735	structural constituent of ribosome	dd	115	31	4.07	7.61671	1.2e-19	2.31e-16	Biased	MF
GO:0003735	structural constituent of ribosome	dl	96	58	4.18	13.8756	< 1e-30	1.3e-53	Biased	MF
GO:0003735	structural constituent of ribosome	dp	113	36	3.99	9.02256	1.1e-25	1.96e-22	Biased	MF
GO:0003735	structural constituent of ribosome	pp	104	14	3.82	3.66492	2.3e-05	0.0147325	Biased	MF
GO:0005201	extracellular matrix structural constituent	dp	31	7	1.1	6.36364	7.9e-05	0.0481356	Biased	MF
GO:0008234	cysteine-type peptidase activity	df	58	11	2.38	4.62185	1.7e-05	0.0115316	Biased	MF
GO:0016787	hydrolase activity	pp	1160	59	42.65	1.38335	9.8e-05	0.0424081	Biased	MF
GO:0030246	carbohydrate binding	df	75	19	3.07	6.18893	3.9e-10	5.16e-07	Biased	MF
GO:0030246	carbohydrate binding	dp	103	12	3.64	3.2967	2.9e-05	0.0267567	Biased	MF
GO:0030246	carbohydrate binding	pp	114	17	4.19	4.05728	4.6e-07	0.00059888	Biased	MF
GO:0006013	mannose metabolic process	dl	10	5	0.1	50	1.6e-08	2.94e-05	LineageExpansion	BP
GO:0006013	mannose metabolic process	dp	12	6	0.46	13.0435	2.3e-06	0.00096126	LineageExpansion	BP
GO:0006259	DNA metabolic process	pp	225	49	6.12	8.00654	2.9e-21	3.8e-18	LineageExpansion	BP
GO:0006310	DNA recombination	dd	75	22	1.85	11.8919	1.3e-18	2.43e-15	LineageExpansion	BP
GO:0006353	DNA-templated transcription, termination	pp	4	3	0.11	27.2727	7.7e-05	0.0496328	LineageExpansion	BP
GO:0006491	N-glycan processing	dp	17	6	0.65	9.23077	2.6e-05	0.00821023	LineageExpansion	BP
GO:0006517	protein deglycosylation	dp	13	6	0.5	12	4.1e-06	0.00141393	LineageExpansion	BP
GO:0006998	nuclear envelope organization	dp	8	5	0.31	16.129	4.1e-06	0.00141393	LineageExpansion	BP
GO:0007155	cell adhesion	dd	91	10	2.24	4.46429	7e-05	0.0429167	LineageExpansion	BP
GO:0007264	small GTPase mediated signal transduction	df	236	16	4.96	3.22581	2.2e-05	0.0189798	LineageExpansion	BP
GO:0007275	multicellular organism development	df	20	8	0.42	19.0476	2.8e-09	3.56e-06	LineageExpansion	BP
GO:0009405	pathogenesis	dp	25	11	0.96	11.4583	5.8e-10	7.35e-07	LineageExpansion	BP
GO:0010468	regulation of gene expression	dp	530	42	20.37	2.06186	2.9e-07	0.00013894	LineageExpansion	BP
GO:0015074	DNA integration	dd	51	22	1.26	17.4603	6.5e-23	2.39e-19	LineageExpansion	BP
GO:0015074	DNA integration	pp	23	17	0.63	26.9841	6.2e-23	1.6e-19	LineageExpansion	BP
GO:0031098	stress-activated protein kinase signaling cascade	dp	46	9	1.77	5.08475	4.9e-05	0.014348	LineageExpansion	BP
GO:0032259	methylation	pp	150	17	4.08	4.16667	3.9e-07	0.00033401	LineageExpansion	BP
GO:0032502	developmental process	dd	548	17	13.51	1.25833	1.4e-06	0.00131948	LineageExpansion	BP
GO:0032502	developmental process	dp	586	60	22.52	2.6643	9e-20	1.7e-16	LineageExpansion	BP
GO:0033234	negative regulation of protein sumoylation	dp	50	13	1.92	6.77083	2.8e-08	1.77e-05	LineageExpansion	BP
GO:0035590	purinergic nucleotide receptor signaling pathway	dd	13	5	0.32	15.625	9.3e-06	0.00682984	LineageExpansion	BP
GO:0035725	sodium ion transmembrane transport	dp	16	9	0.61	14.7541	1.4e-09	1.33e-06	LineageExpansion	BP
GO:0043157	response to cation stress	dd	13	8	0.32	25	1.3e-10	1.58e-07	LineageExpansion	BP
GO:0046854	phosphatidylinositol phosphorylation	dp	32	11	1.23	8.94309	1.3e-08	1.01e-05	LineageExpansion	BP
GO:0051260	protein homooligomerization	df	25	10	0.53	18.8679	2.4e-11	6.27e-08	LineageExpansion	BP
GO:0055074	calcium ion homeostasis	dp	23	9	0.88	10.2273	7.9e-08	4.28e-05	LineageExpansion	BP
[truncated: 549 more rows]
